# Supplementary material
Source: publisher figshare collection journal article supplement (https://acs.figshare.com/ndownloader/files/3777217)
Supplement: Supplementary file 1 [file 3777217]

## Sheet: All peptide info
Supplementary Table 1. Peptide information for the 1,976 proteins identified (source: peptide), oxidative proteins (source: oxidative peptide) and phosphorylated proteins (source: phosphopeptide) in this study. CD and D means control and drought-stressed samples, respectively, and the number next to "-" indicates days 3, 7, 10, and 14. For example, CD-3:113.1 Intensity shows the intensity of pept…
Protein Group	Sequence Id	Source	Sequence	Observed1	Mr(expt)2	Mr(calc)3	Mass Error (ppm)4	Charge state5	Xcorr6	ΔCn7	Sequest Prob8	Modification	Max Num Enzymatic Termini9	Total Spectral Count10	Spectra Intensity11	Total Intensity12	D3/CD313	D7/CD714	D10/CD1015	D14/CD1416	Replicate	iTRAQ label
386	Cluster17585	Phosphopeptide	GLKYIHSANVLHR	1007.5	2012.99	2012.99	1.17	2	2.42	1.22	0.95	iTRAQ8plex[+304.20536] (N-term); Acetyl[+42.010565] (K3); Phospho[+79.966331] (S7); Phospho[+79.966331] (Y4)	2	2	896730	3.82641e+06	1.7353	0.112096	33.0984	0.0300864	rep1	Yes
386	Cluster17585	Phosphopeptide	GLKYIHSANVLHR	1007.5	2012.99	2012.99	0.14	2	2.42	0.2	1	iTRAQ8plex[+304.20536] (N-term); Acetyl[+42.010565] (K3); Phospho[+79.966331] (S7); Phospho[+79.966331] (Y4)	2	2	2.92968e+06	3.82641e+06	1.17125	8.31666	11.6444	94.5528	rep2	Yes
386	Cluster17585	Phosphopeptide	GLKYIHSANVLHR	1007.5	2013	2012.99	2.5	2	2.42	0.2	0.95	iTRAQ8plex[+304.20536] (N-term); Phospho[+79.966331] (S7); Phospho[+79.966331] (Y4); Acetyl[+42.010565] (H6)	2	3	1.7242e+06	6.82545e+06	1.1477	0.383988	26.0203	0.113326	rep2	Yes
386	Cluster17585	Phosphopeptide	GLKYIHSANVLHR	1007.51	2012.99	2012.99	1.53	2	2.42	0.2	0.98	iTRAQ8plex[+304.20536] (N-term); Phospho[+79.966331] (S7); Phospho[+79.966331] (Y4); Acetyl[+42.010565] (H6)	2	3	697639	6.82545e+06	1.11465	0.397994	0.568391	4.04098	rep2	Yes
386	Cluster17585	Phosphopeptide	GLKYIHSANVLHR	1007.51	2012.99	2012.99	1.37	2	2.42	0.2	1	iTRAQ8plex[+304.20536] (N-term); Phospho[+79.966331] (S7); Phospho[+79.966331] (Y4); Acetyl[+42.010565] (H6)	2	3	4.40361e+06	6.82545e+06	1.10508	0.149622	0.630845	3.65158	rep2	Yes
603	Cluster38118	Phosphopeptide	SGSGSSSSSEDDGQGGR	970.889	1939.76	1939.77	2.61	2	2.42	1.32	0.98	iTRAQ8plex[+304.20536] (N-term); Phospho[+79.966331] (S3)	2	2	260332	520664	168.423	0.0928593	0.344298	0.112043	rep1	Yes
603	Cluster38118	Phosphopeptide	SGSGSSSSSEDDGQGGR	970.889	1939.76	1939.77	1.13	2	2.42	0.2	1	iTRAQ8plex[+304.20536] (N-term); Phospho[+79.966331] (S3)	2	2	260332	520664	1.7353	0.112096	33.0984	0.0300864	rep1	Yes
885	Cluster1620	Phosphopeptide	GLAETTFK	777.918	1553.82	1553.83	7.92	2	2.42	0.2	0.95	iTRAQ8plex[+304.20536] (N-term); iTRAQ8plex[+304.20536] (K8); Phospho[+79.966331] (T6)	2	1	3.9023e+06	3.9023e+06	1.00401	45.0716	23.6027	123.497	rep2	Yes
885	Cluster1620	Phosphopeptide	VSDLTWKTR	806.376	1610.74	1610.74	3.37	2	2.42	0.2	0.99	iTRAQ8plex[+304.20536] (N-term); Acetyl[+42.010565] (S2); Phospho[+79.966331] (T5); Phospho[+79.966331] (T8)	2	1	4.98089e+06	4.98089e+06	1.79082	1.65095	11.3168	3.69992	rep1	Yes
1370	Cluster49536	Phosphopeptide	DGVSEEGKKQPSEK	958.466	1914.92	1914.92	4.22	2	2.42	0.2	1	iTRAQ8plex[+304.20536] (N-term); Phospho[+79.966331] (S4); Methyl[+14.01565] (K8)	2	1	4.12388e+06	4.12388e+06	92.5173	1.17123	0.629177	388.463	rep2	Yes
1370	Cluster49536	Phosphopeptide	DGVSEEGKKQPSEK	958.468	1914.92	1914.92	2.27	2	2.42	0.28	0.95	iTRAQ8plex[+304.20536] (N-term); Methyl[+14.01565] (K8); Phospho[+79.966331] (S12)	2	1	8565754	8565754	2.11707	3.23211	0.381847	394.496	rep1	Yes
1375	Cluster24097	Phosphopeptide	AAKSPSYYK	964.069	1926.13	1926.12	0.42	2	3.16	0.02	1	iTRAQ8plex@N-term; iTRAQ8plex(K)@3; Phospho[+79.966331] (S4); iTRAQ8plex(K)@9	2	7	1.88251e+06	1.88251e+06	0.713098	1.20947	0.693893	0.917946	rep2	Yes
1375	Cluster24097	Phosphopeptide	AGKAANSEVISVNPVYLK	1136.61	2271.21	2271.22	1.91	2	2.42	0.2	0.95	iTRAQ8plex[+304.20536] (N-term); Dimethyl[+28.0313] (K3); Phospho[+79.966331] (S11)	2	1	3.21522e+06	3.21522e+06	1.10724	0.125731	0.736559	3.57879	rep2	Yes
1	Cluster17067	Peptide	AAQQVNIPVPEGCTDPQADNFDPTAR	1035.82	3104.45	3104.45	0.97	3	2.41	0	0.95	iTRAQ8plex[+304.20536] (N-term); Methylthio (C13); Deamidated[+0.984016] (N20)	2	4	5.60396e+06	1.69805e+07	0.0470179	0.179836	0.0188901	0.0537401	rep1	Yes
1	Cluster17067	Peptide	AAQQVNIPVPEGCTDPQADNFDPTAR	1035.49	3103.46	3103.46	0	3	2.41	0	0.95	iTRAQ8plex[+304.20536] (N-term); Methylthio (C13)	2	28	956536	1.41581e+08	1.00088	10.229	0.595467	3.82225	rep2	Yes
1	Cluster17067	Peptide	DEDIVTLVDQFPGQSIDFFGALR	962.833	2885.48	2885.47	1.35	3	2.41	0	0.95	iTRAQ8plex[+304.20536] (N-term)	2	5	2.17393e+07	7.70584e+07	0.0181658	0.0510286	0.337501	32.2547	rep1	Yes
1	Cluster17067	Peptide	EAADMIK	693.396	1384.78	1080.58	9.5	2	2.86	2.57	0.95	iTRAQ8plex[+304.20536] (K7)	2	3	4.5894e+08	1293068860	1.48156	5.53891	12.1239	0.137291	rep1	Yes
1	Cluster17067	Peptide	EAADMIK	693.394	1384.77	1080.58	3.52	2	2.31	0	0.95	iTRAQ8plex[+304.20536] (N-term); iTRAQ8plex[+304.20536] (K7)	2	2	1.86128e+07	3.98291e+07	2.7228	0.245597	56.8322	367.81	rep2	Yes
1	Cluster17067	Peptide	EDKQTDGDR	836.44	1670.86	1366.66	9.5	2	2.76	2.35	0.95	iTRAQ8plex[+304.20536] (K3)	2	1	954846	954846	1.2607	4.95218	0.222506	0.914868	rep1	Yes
1	Cluster17067	Peptide	EDKQTDGDR	836.44	1670.86	1670.86	1.68	2	2.31	0	0.95	iTRAQ8plex[+304.20536] (N-term); iTRAQ8plex[+304.20536] (K3)	2	9	954847	2.08592e+07	1.2607	4.95216	0.222506	0.914871	rep1	Yes
1	Cluster17067	Peptide	EGPPVFEQPAMTLEK	1141.12	2280.22	1976.02	9.5	2	6.05	6.86	1	iTRAQ8plex[+304.20536] (K15)	2	17	1.52357e+08	9.18044e+08	2.28973	21.0782	0.83766	1.88513	rep1	Yes
1	Cluster17067	Peptide	EGPPVFEQPAMTLEK	765.753	2294.23	2294.24	2.48	3	2.41	0	0.95	iTRAQ8plex[+304.20536] (N-term); iTRAQ8plex[+304.20536] (K15); Pro->pyro-Glu[+13.979265] (T12)	2	1	3.05433e+07	3.05433e+07	65.0249	0.0840442	26.4781	226.058	rep2	Yes
1	Cluster17067	Peptide	EGPPVFEQPAMTLEK	1141.12	2280.22	1976.02	2.02	2	2.31	0	0.95	iTRAQ8plex[+304.20536] (N-term); iTRAQ8plex[+304.20536] (K15)	2	36	3.9534e+06	380374970	0.0104452	0.0640209	46.0002	0.0925672	rep2	Yes
1	Cluster17067	Peptide	EGPPVFEQPAMTLEK	668.354	2002.04	2002.04	0.9	3	2.41	0	0.95	Delta:H(2)C(2)[+26.01565] (N-term); iTRAQ8plex[+304.20536] (K15)	2	5	2.21505e+07	6.45665e+07	367.912	50.0395	0.32859	56.5279	rep1	Yes
1	Cluster17067	Peptide	FVEGLGVEK	793.473	1584.93	1280.73	9.5	2	4.07	4.52	0.97	iTRAQ8plex[+304.20536] (K9)	2	46	4.37375e+07	5978476463	1.19282	5.66706	0.360118	1.54318	rep1	Yes
1	Cluster17067	Peptide	FVEGLGVEK	793.47	1584.92	1280.73	3.28	2	2.31	0	0.95	iTRAQ8plex[+304.20536] (N-term); iTRAQ8plex[+304.20536] (K9)	2	63	21412664	719857924	115.668	0.148074	0.621471	1.11202	rep2	Yes
1	Cluster17067	Peptide	FVEGLGVEK	804.462	1606.91	1606.91	2.49	2	2.31	0	0.95	iTRAQ8plex[+304.20536] (N-term); iTRAQ8plex[+304.20536] (K9); Cation:Na[+21.981943] (E8)	2	1	1.05768e+07	1.05768e+07	1.07351	0.158703	45.7316	5.35665	rep2	Yes
1	Cluster17067	Peptide	FYWAPTR	774.938	1547.86	1547.87	3.75	2	2.31	0	0.95	iTRAQ8plex[+304.20536] (N-term); iTRAQ8plex[+304.20536] (Y2)	2	5	3.36711e+06	3.60584e+07	1.07747	11.5281	0.613758	3.50143	rep2	Yes
1	Cluster17067	Peptide	FYWAPTR	622.838	1243.66	1243.64	3.38	2	2.31	0	0.95	iTRAQ8plex[+304.20536] (N-term)	2	108	1.33036e+07	1185767354	88.5331	0.318416	18.0503	14.2505	rep2	Yes
1	Cluster17067	Peptide	FYWAPTREDR	822.925	1643.83	1643.83	2.07	2	2.31	0	0.95	iTRAQ8plex[+304.20536] (N-term)	2	3	8.77635e+06	3.35594e+07	5.46797	1.2602	47.7783	3.2931	rep1	Yes
1	Cluster17067	Peptide	GLAYDTSDDQQDITR	1001.49	2000.96	1696.75	10	2	5.93	6.72	1		2	61	6.23734e+06	2.19466e+09	0	0	0	0	rep2	No
1	Cluster17067	Peptide	GLAYDTSDDQQDITR	675.319	2022.93	2022.94	1.78	3	2.41	0	0.95	iTRAQ8plex[+304.20536] (N-term); Cation:Na[+21.981943] (D5)	2	4	3.93418e+07	5.26783e+07	1.91377	0.0874518	60.5637	10.45	rep2	Yes
1	Cluster17067	Peptide	GLAYDTSDDQQDITR	1153.59	2305.16	2305.16	1.74	2	2.31	0	0.95	iTRAQ8plex[+304.20536] (N-term); iTRAQ8plex[+304.20536] (S7)	2	3	4.77795e+06	2.88842e+07	1.14974	0.122081	0.616442	3.15603	rep2	Yes
1	Cluster17067	Peptide	GLAYDTSDDQQDITR	1153.59	2305.16	2305.16	1.74	2	2.31	0	0.95	iTRAQ8plex[+304.20536] (N-term); iTRAQ8plex[+304.20536] (Y4)	2	11	1.96464e+06	1.37295e+08	1.05655	0.467382	0.607439	234.792	rep2	Yes
1	Cluster17067	Peptide	GLAYDTSDDQQDITR	1176.58	2351.15	2351.16	1.7	2	2.31	0	0.95	iTRAQ8plex[+304.20536] (N-term); iTRAQ8plex[+304.20536] (Y4); Methylthio (D5)	2	1	3.36842e+06	3.36842e+06	1.05193	0.342665	0.625295	3.02556	rep2	Yes
1	Cluster17067	Peptide	GLAYDTSDDQQDITR	1176.58	2351.15	2351.15	1.7	2	2.31	0	0.95	iTRAQ8plex[+304.20536] (N-term); iTRAQ8plex[+304.20536] (Y4); Methylthio (D8)	2	1	7.97297e+06	7.97297e+06	1.80303	1.06263	34.1766	378.86	rep1	Yes
1	Cluster17067	Peptide	GLAYDTSDDQQDITR	661.989	1982.94	1982.95	1.36	3	2.41	0	0.95	iTRAQ8plex[+304.20536] (N-term); Glu->pyro-Glu[-18.010565] (T6)	2	5	7.38969e+06	5.00677e+07	0.51427	1.90683	40.8206	0.858825	rep1	Yes
1	Cluster17067	Peptide	GLAYDTSDDQQDITR	992.481	1982.95	1982.95	1.31	2	2.31	0	0.95	iTRAQ8plex[+304.20536] (N-term); Glu->pyro-Glu[-18.010565] (T14)	2	1	6.06983e+06	6.06983e+06	1.14811	0.333119	0.596477	367.375	rep2	Yes
1	Cluster17067	Peptide	GLAYDTSDDQQDITR	992.481	1982.95	1982.95	1.21	2	2.31	0	0.95	iTRAQ8plex[+304.20536] (N-term); Glu->pyro-Glu[-18.010565] (D9)	2	1	8.45318e+06	8.45318e+06	0.0343573	7.39536	34.2002	475.003	rep2	Yes
1	Cluster17067	Peptide	GLAYDTSDDQQDITR	992.483	1982.95	1980.94	1.21	2	2.31	0	0.95	iTRAQ8plex[+304.20536] (N-term); Glu->pyro-Glu[-18.010565] (S7)	2	4	3.704e+06	6.10308e+07	0.614643	7.89884	55.213	113.07	rep2	Yes
1	Cluster17067	Peptide	GLAYDTSDDQQDITR	1008.49	2014.97	2000.95	1	2	2.31	0	0.95	iTRAQ8plex[+304.20536] (N-term)	2	134	4.35243e+06	9.87295e+08	15.2685	0.281619	4.10412	4.65714	rep2	Yes
1	Cluster17067	Peptide	GLAYDTSDDQQDITR	1000.48	1998.94	1998.94	1	2	2.31	0	0.95	iTRAQ8plex[+304.20536] (N-term); Ser->Oxoalanine[-2.015650064] (S7)	2	1	1.23253e+07	1.23253e+07	1.44097	1.13802	0.342552	2.5043	rep1	Yes
1	Cluster17067	Peptide	GLAYDTSDDQQDITR	1024.48	2046.94	2046.95	0.98	2	2.31	0	0.95	iTRAQ8plex[+304.20536] (N-term); Methylthio (D5)	2	11	8.49297e+06	1.0118e+08	4.1659	6.37918	85.1527	1.66079	rep1	Yes
1	Cluster17067	Peptide	GLAYDTSDDQQDITR	1035.47	2068.92	2068.93	0.97	2	2.31	0	0.95	iTRAQ8plex[+304.20536] (N-term); Dichloro[+67.92205537] (Y4)	2	1	2.14717e+06	2.14717e+06	1.10796	1.23705	0.559789	98.9977	rep2	Yes
1	Cluster17067	Peptide	GLAYDTSDDQQDITR	1074.49	2146.96	2146.96	0.93	2	2.31	0	0.95	iTRAQ8plex[+304.20536] (N-term); dHex[+146.057909] (S7)	2	1	3.01387e+06	3.01387e+06	1.03949	0.394873	0.582582	3.35216	rep2	Yes
1	Cluster17067	Peptide	GMVDSVFQAPMGTGTHNAVLSSYEYISQGLK	1304.66	3910.96	3910.96	1.53	3	2.41	0	0.95	iTRAQ8plex[+304.20536] (N-term); iTRAQ8plex[+304.20536] (K31)	2	1	1.04131e+06	1.04131e+06	1.5054	258.135	0.0303314	91.2492	rep2	Yes
1	Cluster17067	Peptide	GTFYGK	640.874	1279.73	975.533	9.5	2	2.87	2.59	0.95	iTRAQ8plex[+304.20536] (K6)	2	1	1.35823e+08	1.35823e+08	1.42314	4.90963	0.243647	0.569071	rep1	Yes
1	Cluster17067	Peptide	GTFYGK	792.972	1583.93	1583.93	3.79	2	2.31	0	0.95	iTRAQ8plex[+304.20536] (N-term); iTRAQ8plex[+304.20536] (K6); iTRAQ8plex[+304.20536] (Y4)	2	4	3.91047e+06	4.78345e+07	0.976048	0.298303	0.606196	686.854	rep2	Yes
1	Cluster17067	Peptide	GTFYGK	640.873	1279.73	1279.73	3.13	2	2.31	0	0.95	iTRAQ8plex[+304.20536] (N-term); iTRAQ8plex[+304.20536] (K6)	2	7	2.01073e+07	9.16511e+07	0.838701	3.42623	0.815507	2.25148	rep2	Yes
1	Cluster17067	Peptide	KFVEGLGVEK	857.518	1713.02	1408.82	9.5	2	3.94	2.76	0.95	iTRAQ8plex[+304.20536] (K10)	2	3	2.70085e+07	7.90841e+07	1.70203	1.45987	0.392459	1.23752	rep1	Yes
1	Cluster17067	Peptide	KFVEGLGVEK	857.518	1713.02	1713.03	5.3	2	3.88	2.71	0.95	iTRAQ8plex[+304.20536] (K1); iTRAQ8plex[+304.20536] (K10)	2	3	1.50985e+07	2.48762e+07	2.06412	1.64094	0.351222	10.9674	rep1	Yes
1	Cluster17067	Peptide	KFVEGLGVEK	1009.62	2017.22	1713.02	3.5	2	2.31	0	0.95	iTRAQ8plex[+304.20536] (N-term); iTRAQ8plex[+304.20536] (K1); iTRAQ8plex[+304.20536] (K10)	2	50	2.07862e+06	261010508	0.853006	7.69031	0.628921	3.10927	rep2	Yes
1	Cluster17067	Peptide	KFVEGLGVEK	1020.61	2039.21	2039.21	2.94	2	2.31	0	0.95	iTRAQ8plex[+304.20536] (N-term); iTRAQ8plex[+304.20536] (K1); iTRAQ8plex[+304.20536] (K10); Cation:Na[+21.981943] (E9)	2	1	548775	548775	0.943615	7.65273	0.638078	4.72006	rep2	Yes
1	Cluster17067	Peptide	LMEYGNMLVMEQENVK	1268.65	2535.29	2231.09	9.5	2	4.9	6.32	1	iTRAQ8plex[+304.20536] (K16)	2	19	1.50586e+07	7.95125e+08	2.11612	4.11738	0.365339	1.97071	rep1	Yes
1	Cluster17067	Peptide	LMEYGNMLVMEQENVK	850.778	2549.31	2549.3	2.12	3	2.41	0	0.95	iTRAQ8plex[+304.20536] (N-term); iTRAQ8plex[+304.20536] (K16); Pro->pyro-Glu[+13.979265] (L1)	2	2	1.94384e+07	2.68693e+07	0.590315	1.53912	26.6051	0.124707	rep1	Yes
1	Cluster17067	Peptide	LMEYGNMLVMEQENVK	947.504	2839.49	2839.49	2.11	3	2.41	0	0.95	iTRAQ8plex[+304.20536] (N-term); iTRAQ8plex[+304.20536] (K16); iTRAQ8plex[+304.20536] (Y4)	2	2	4.8501e+06	6.31332e+06	0.976892	0.11374	0.605555	0.0363388	rep2	Yes
1	Cluster17067	Peptide	LMEYGNMLVMEQENVK	853.432	2557.27	2557.28	1.88	3	2.41	0	0.95	iTRAQ8plex[+304.20536] (N-term); iTRAQ8plex[+304.20536] (K16); Cation:Na[+21.981943] (E13)	2	1	9.55359e+06	9.55359e+06	1.08131	0.0604126	39.7443	0.194171	rep2	Yes
1	Cluster17067	Peptide	LMEYGNMLVMEQENVK	1268.65	2535.29	2535.26	0.79	2	2.31	0	0.95	iTRAQ8plex[+304.20536] (N-term); iTRAQ8plex[+304.20536] (K16)	2	33	2.02341e+07	3.25076e+08	3.81827	2.5486	0.319416	1.89829	rep1	Yes
1	Cluster17067	Peptide	LMEYGNMLVMEQENVKR	898.139	2691.39	2387.2	9.5	3	6.59	4.87	1	iTRAQ8plex[+304.20536] (K16)	2	4	5.2686e+06	4.52221e+07	2.11338	1.47263	34.6824	2.2236	rep1	Yes
1	Cluster17067	Peptide	LMEYGNMLVMEQENVKR	898.138	2691.39	2691.4	1.56	3	2.41	0	0.95	iTRAQ8plex[+304.20536] (N-term); iTRAQ8plex[+304.20536] (K16)	2	8	6.15741e+06	9.4448e+07	150.975	1.50345	52.3168	2.22361	rep1	Yes
1	Cluster17067	Peptide	LVVHITK	709.468	1416.92	1112.72	9.5	2	3.28	5.22	0.99	iTRAQ8plex[+304.20536] (K7)	2	45	1.19931e+08	3623919162	1.97212	6.13906	0.370888	1.42129	rep1	Yes
1	Cluster17067	Peptide	LVVHITK	358.742	1430.94	1430.94	4.19	4	2.61	0	0.95	iTRAQ8plex[+304.20536] (N-term); iTRAQ8plex[+304.20536] (K7); Pro->pyro-Glu[+13.979265] (T6)	2	1	1.441e+07	1.441e+07	239.221	0.0784329	2.61097	2.62223	rep1	Yes
1	Cluster17067	Peptide	LVVHITK	709.469	1416.92	1112.72	3.77	2	2.31	0	0.95	iTRAQ8plex[+304.20536] (N-term); iTRAQ8plex[+304.20536] (K7)	2	77	5.54055e+06	493704761	1.22751	0.303056	47.8636	1.90283	rep2	Yes
1	Cluster17067	Peptide	LVVHITK	570.375	1138.73	1138.74	2.28	2	2.31	0	0.95	Delta:H(2)C(2)[+26.01565] (N-term); iTRAQ8plex[+304.20536] (K7)	2	2	1.68114e+07	3.86151e+07	0.0153621	0.110014	35.8399	0.0103163	rep2	Yes
1	Cluster17067	Peptide	LVVHITK	861.569	1721.12	1721.13	2.21	2	2.31	0	0.95	iTRAQ8plex[+304.20536] (N-term); iTRAQ8plex[+304.20536] (K7); iTRAQ8plex[+304.20536] (T6)	2	1	2.76614e+06	2.76614e+06	0.0163259	0.0752423	0.636743	321.828	rep2	Yes
1	Cluster17067	Peptide	MCCLFINDLDAGAGR	665.634	1993.88	1913.91	1.88	3	2.41	0	0.95	iTRAQ8plex[+304.20536] (N-term); Methylthio (C2); Methylthio (C3)	2	13	9.9746e+06	6.74898e+07	1.07947	0.166896	0.671447	2.8053	rep2	Yes
1	Cluster17067	Peptide	MCCLFINDLDAGAGR	950.953	1899.89	1899.89	1.79	2	2.31	0	0.95	iTRAQ8plex[+304.20536] (N-term); Dethiomethyl[-48.003371] (M1); Methylthio (C2); Methylthio (C3)	2	4	7.26198e+06	3.20896e+07	119.775	0.161893	0.658698	0.178903	rep2	Yes
1	Cluster17067	Peptide	MCCLFINDLDAGAGR	951.443	1900.87	1900.87	1.26	2	2.31	0	0.95	iTRAQ8plex[+304.20536] (N-term); Dethiomethyl[-48.003371] (M1); Methylthio (C2); Methylthio (C3); Deamidated[+0.984016] (N7)	2	7	8.42344e+06	5.00618e+07	1.29282	0.209193	0.660808	0.182776	rep2	Yes
1	Cluster17067	Peptide	MCCLFINDLDAGAGR	998.439	1994.86	1994.87	1	2	2.31	0	0.95	iTRAQ8plex[+304.20536] (N-term); Methylthio (C2); Methylthio (C3); Deamidated[+0.984016] (N7)	2	10	8.75831e+06	9.88728e+07	0.00873751	5.63566	85.6136	25.6604	rep1	Yes
1	Cluster17067	Peptide	MGGTTQYTVNNQMVNATLMNIADNPTNVQLPGMYNK	1138.82	4551.24	4247.04	9.5	4	6.18	2.76	1	iTRAQ8plex[+304.20536] (K36)	2	2	4.18061e+07	6.63616e+07	1.33997	9.26148	0.640605	1.34777	rep1	Yes
1	Cluster17067	Peptide	MGGTTQYTVNNQMVNATLMNIADNPTNVQLPGMYNK	1138.82	4551.24	4585.2	0.87	4	2.61	0	0.95	iTRAQ8plex[+304.20536] (N-term); iTRAQ8plex[+304.20536] (K36)	2	2	2.45555e+07	2.61456e+07	1.14174	8.65217	15.2156	0.0585679	rep2	Yes
1	Cluster17067	Peptide	MGINPIMMSAGELESGNAGEPAK	1456.74	2911.47	2607.26	9.5	2	6.35	7.12	1	iTRAQ8plex[+304.20536] (K23)	2	7	1.351e+07	7.18856e+08	1.0601	2.38457	0.109301	1.29157	rep1	Yes
1	Cluster17067	Peptide	MGINPIMMSAGELESGNAGEPAK	884.097	2649.27	2649.28	2.47	3	3.7	3.16	0.95	Acetyl[+42.010565] (S9); iTRAQ8plex[+304.20536] (K23)	2	1	1.87242e+07	1.87242e+07	0.0197076	0.219444	0.606153	0.177069	rep2	Yes
1	Cluster17067	Peptide	MGINPIMMSAGELESGNAGEPAK	804.922	3215.65	3215.66	2.11	4	2.61	0	0.95	iTRAQ8plex[+304.20536] (N-term); iTRAQ8plex[+304.20536] (K23); iTRAQ8plex[+304.20536] (S15)	2	1	1.62031e+07	1.62031e+07	0.04516	0.133672	0.644109	0.10431	rep2	Yes
1	Cluster17067	Peptide	MGINPIMMSAGELESGNAGEPAK	1317.64	2633.27	2633.27	1.52	2	2.31	0	0.95	Delta:H(2)C(2)[+26.01565] (N-term); iTRAQ8plex[+304.20536] (K23)	2	2	4.16618e+06	2.65493e+07	2.12762	0.0745059	50.8856	0.0993559	rep1	Yes
1	Cluster17067	Peptide	MGINPIMMSAGELESGNAGEPAK	971.824	2912.45	2912.45	1.13	3	2.41	0	0.95	iTRAQ8plex[+304.20536] (N-term); iTRAQ8plex[+304.20536] (K23); Deamidated[+0.984016] (N17)	2	2	4.4177e+06	5.9784e+06	0.0431508	0.267034	0.717517	0.132083	rep2	Yes
1	Cluster17067	Peptide	MGINPIMMSAGELESGNAGEPAK	888.769	2663.28	2649.27	0.57	3	2.41	0	0.95	Acetyl[+42.010565] (N-term); iTRAQ8plex[+304.20536] (K23)	2	14	1.29243e+07	1.35233e+08	0.0238039	0.202053	0.310598	4.21943	rep1	Yes
1	Cluster17067	Peptide	MGINPIMMSAGELESGNAGEPAK	884.099	2649.27	2649.28	0.53	3	2.41	0	0.95	iTRAQ8plex[+304.20536] (N-term); iTRAQ8plex[+304.20536] (K23)	2	13	1.60168e+07	1.50282e+08	1.41385	5.42034	0.352116	1.37208	rep1	Yes
1	Cluster17067	Peptide	NFLTLPNIK	834.517	1667.02	1362.82	10	2	4.15	4.69	0.98	iTRAQ8plex[+304.20536] (K9)	2	81	5.60432e+06	10887532837	1.05906	0.0494603	0.66039	0.206733	rep2	Yes
1	Cluster17067	Peptide	NFLTLPNIK	566.027	1695.06	1695.06	3.36	3	2.41	0	0.95	iTRAQ8plex[+304.20536] (N-term); iTRAQ8plex[+304.20536] (K9); Formyl[+27.994915] (N1)	2	1	1.84321e+07	1.84321e+07	0.009985	0.223726	0.00902366	101.859	rep2	Yes
1	Cluster17067	Peptide	NFLTLPNIK	834.514	1667.01	1362.81	3.23	2	2.31	0	0.95	iTRAQ8plex[+304.20536] (N-term); iTRAQ8plex[+304.20536] (K9)	2	109	2.24987e+07	1156840995	0.999348	0.0704915	0.647962	0.00812756	rep2	Yes
1	Cluster17067	Peptide	NFLTLPNIK	841.525	1681.03	1681.04	2.5	2	2.31	0	0.95	iTRAQ8plex[+304.20536] (N-term); iTRAQ8plex[+304.20536] (K9); Pro->pyro-Glu[+13.979265] (I8)	2	2	1.19734e+07	3.75273e+07	44.4187	0.0157082	0.596936	30.0918	rep2	Yes
1	Cluster17067	Peptide	NFLTLPNIK	835.006	1668	1668	2.4	2	2.31	0	0.95	iTRAQ8plex[+304.20536] (N-term); iTRAQ8plex[+304.20536] (K9); Deamidated[+0.984016] (N1)	2	3	1.19739e+07	4.47823e+07	0.933585	0.164486	0.659844	0.0896302	rep2	Yes
1	Cluster17067	Peptide	NFLTLPNIK	835.009	1668	1668.01	2.28	2	2.31	0	0.95	iTRAQ8plex[+304.20536] (N-term); iTRAQ8plex[+304.20536] (K9); Deamidated[+0.984016] (N7)	2	1	2.19581e+07	2.19581e+07	1.03971	0.0986831	0.655042	9.98257	rep2	Yes
1	Cluster17067	Peptide	NFLTLPNIK	550.676	1649.01	1649.01	2	3	2.41	0	0.95	iTRAQ8plex[+304.20536] (N-term); iTRAQ8plex[+304.20536] (K9); Glu->pyro-Glu[-18.010565] (T4)	2	1	1.06741e+07	1.06741e+07	1.77416	0.118106	96.4304	54.0282	rep1	Yes
1	Cluster17067	Peptide	QTDGDR	498.255	994.494	690.293	10	2	2.36	1.79	0.95		2	1	808256	808256	0	0	0	0	rep1	No
1	Cluster17067	Peptide	QTDGDR	498.255	994.494	994.497	3.02	2	2.31	0	0.95	iTRAQ8plex[+304.20536] (N-term)	2	42	497589	70404399	0.034126	8.70293	0.59644	3.08018	rep2	Yes
1	Cluster17067	Peptide	QTDGDRWK	538.631	1612.87	1308.67	9.5	3	3.8	3.17	0.95	iTRAQ8plex[+304.20536] (K8)	2	4	1.10737e+08	1.63898e+08	1.2413	7.15371	0.330653	0.858502	rep1	Yes
1	Cluster17067	Peptide	QTDGDRWK	807.442	1612.87	1612.87	1.74	2	2.31	0	0.95	iTRAQ8plex[+304.20536] (N-term); iTRAQ8plex[+304.20536] (K8)	2	5	2.02961e+07	7.70883e+07	1.06149	3.12014	0.794458	2.03779	rep1	Yes
1	Cluster17067	Peptide	QYNLDNMMDGLYIAAAFMDK	1004.82	3011.43	3011.43	1	3	2.41	0	0.95	iTRAQ8plex[+304.20536] (N-term); iTRAQ8plex[+304.20536] (K20)	2	1	8.96637e+06	8.96637e+06	0.0112042	0.101609	0.649718	40.3302	rep2	Yes
1	Cluster17067	Peptide	RVQLADQYLNEAALGDANADAIGR	950.165	2847.47	2543.27	3.18	3	2.41	0	0.95	iTRAQ8plex[+304.20536] (N-term)	2	37	1.91989e+06	3.16852e+08	1.10336	5.8582	0.61615	4.09463	rep2	Yes
1	Cluster17067	Peptide	RVQLADQYLNEAALGDANADAIGR	788.928	3151.68	3151.68	3.05	4	2.61	0	0.95	iTRAQ8plex[+304.20536] (N-term); iTRAQ8plex[+304.20536] (Y8)	2	6	5.74225e+06	4.62554e+07	94.1032	0.185404	0.486703	0.0613772	rep2	Yes
1	Cluster17067	Peptide	RVQLADQYLNEAALGDANADAIGR	950.493	2848.46	2848.46	2.63	3	2.41	0	0.95	iTRAQ8plex[+304.20536] (N-term); Deamidated[+0.984016] (N10)	2	1	1.6611e+07	1.6611e+07	1.15526	0.382468	21.2222	0.05086	rep2	Yes
1	Cluster17067	Peptide	RVQLADQYLNEAALGDANADAIGR	950.492	2848.45	2848.46	2.53	3	2.41	0	0.95	iTRAQ8plex[+304.20536] (N-term); Deamidated[+0.984016] (N18)	2	2	2.13282e+07	45229538	1.1324	0.201364	0.728423	3.27398	rep2	Yes
1	Cluster17067	Peptide	SDDGTCVYNF	742.819	1483.62	1469.61	0.68	2	2.31	0	0.95	iTRAQ8plex[+304.20536] (N-term); Methylthio (C6)	2	8	7.8249e+06	6.93398e+07	2.32632	4.02652	0.472477	48.6291	rep1	Yes
1	Cluster17067	Peptide	SFQCELVMAK	603.987	1808.94	1808.94	3.84	3	2.41	0	0.95	iTRAQ8plex[+304.20536] (N-term); iTRAQ8plex[+304.20536] (K10); Methylthio (C4)	2	75	118786200	1627292056	1.67715	5.58072	0.413287	2.4493	rep1	Yes
1	Cluster17067	Peptide	SFQCELVMAK	511.257	1530.75	1530.75	2.16	3	2.41	0	0.95	Delta:H(2)C(2)[+26.01565] (N-term); Methylthio (C4); iTRAQ8plex[+304.20536] (K10)	2	1	1.20047e+07	1.20047e+07	0.864195	0.0599079	0.637349	0.212177	rep2	Yes
1	Cluster17067	Peptide	TDNVKDEDIVTLVDQFPGQSIDFFGALR	937.748	3746.96	3442.76	9.5	4	5.96	3.01	1	iTRAQ8plex[+304.20536] (K5)	2	48	1.24255e+07	2.76535e+08	1.4935	0.0707148	25.7701	0.986705	rep1	Yes
1	Cluster17067	Peptide	TDNVKDEDIVTLVDQFPGQSIDFFGALR	1157.27	3468.77	3468.76	2.59	3	2.41	0	0.95	Delta:H(2)C(2)[+26.01565] (N-term); iTRAQ8plex[+304.20536] (K5)	2	21	1.02475e+07	2.33593e+08	0.036854	8.55254	0.644297	0.721957	rep2	Yes
1	Cluster17067	Peptide	TDNVKDEDIVTLVDQFPGQSIDFFGALR	933.243	3728.94	3728.95	2.25	4	2.61	0	0.95	iTRAQ8plex[+304.20536] (N-term); iTRAQ8plex[+304.20536] (K5); Glu->pyro-Glu[-18.010565] (T11)	2	2	2.47727e+06	6.27506e+06	1.00877	7.74929	25.5202	0.198631	rep2	Yes
1	Cluster17067	Peptide	TDNVKDEDIVTLVDQFPGQSIDFFGALR	943.238	3768.92	3768.93	2.23	4	2.61	0	0.95	iTRAQ8plex[+304.20536] (N-term); iTRAQ8plex[+304.20536] (K5); Cation:Na[+21.981943] (E7)	2	1	1.45211e+07	1.45211e+07	1.06014	7.91011	0.652181	0.857481	rep2	Yes
1	Cluster17067	Peptide	TDNVKDEDIVTLVDQFPGQSIDFFGALR	947.232	3784.9	3784.91	2.22	4	2.61	0	0.95	iTRAQ8plex[+304.20536] (N-term); iTRAQ8plex[+304.20536] (K5); Cation:K[+37.955882] (E7)	2	1	1.83205e+06	1.83205e+06	0.802922	7.77908	0.692265	0.413509	rep2	Yes
1	Cluster17067	Peptide	TDNVKDEDIVTLVDQFPGQSIDFFGALR	950.974	3799.87	3799.87	2.21	4	2.61	0	0.95	iTRAQ8plex[+304.20536] (N-term); iTRAQ8plex[+304.20536] (K5); Deamidated[+0.984016] (Q15)	2	1	1.91047e+06	1.91047e+06	21.5432	7.44307	0.610252	0.817637	rep2	Yes
1	Cluster17067	Peptide	TDNVKDEDIVTLVDQFPGQSIDFFGALR	1148.59	3442.75	3746.96	0.8	3	2.41	0	0.95	iTRAQ8plex[+304.20536] (N-term); iTRAQ8plex[+304.20536] (K5)	2	156	1.50711e+07	942269521	0.0209279	5.8557	0.332407	0.39324	rep1	Yes
1	Cluster17067	Peptide	VPIIVTGNDFSTLYAPLIR	1197.19	2392.36	2088.16	10	2	5.59	7.22	1		2	89	1.91258e+08	4.60154e+09	0	0	0	0	rep1	No
1	Cluster17067	Peptide	VPIIVTGNDFSTLYAPLIR	675.151	2696.57	2696.58	2.82	4	2.61	0	0.95	iTRAQ8plex[+304.20536] (N-term); iTRAQ8plex[+304.20536] (T6)	2	1	1.80121e+06	1.80121e+06	0.0245274	0.142758	21.7446	29.2229	rep2	Yes
1	Cluster17067	Peptide	VPIIVTGNDFSTLYAPLIR	899.863	2696.56	2696.57	2.23	3	2.41	0	0.95	iTRAQ8plex[+304.20536] (N-term); iTRAQ8plex[+304.20536] (S11)	2	1	1.03911e+07	1.03911e+07	0.0170696	0.0409559	0.616489	0.0848993	rep2	Yes
1	Cluster17067	Peptide	VPIIVTGNDFSTLYAPLIR	899.864	2696.57	2696.57	2.23	3	2.41	0	0.95	iTRAQ8plex[+304.20536] (N-term); iTRAQ8plex[+304.20536] (Y14)	2	18	6.74597e+06	136793808	0.0108739	0.0540319	0.540611	0.0991644	rep2	Yes
1	Cluster17067	Peptide	VPIIVTGNDFSTLYAPLIR	900.192	2697.55	2697.55	2.11	3	2.41	0	0.95	iTRAQ8plex[+304.20536] (N-term); iTRAQ8plex[+304.20536] (Y14); Deamidated[+0.984016] (N8)	2	2	1.40949e+07	2.4568e+07	1.26976	1.71818	47.5918	26.0913	rep1	Yes
1	Cluster17067	Peptide	VPIIVTGNDFSTLYAPLIR	1197.68	2393.35	2393.35	0.84	2	2.31	0	0.95	iTRAQ8plex[+304.20536] (N-term); Deamidated[+0.984016] (N8)	2	17	4.06474e+06	7.4215e+07	2.13263	3.15996	0.443799	17.9821	rep1	Yes
1	Cluster17067	Peptide	VPIIVTGNDFSTLYAPLIR	1197.19	2392.36	2392.37	0.84	2	2.31	0	0.95	iTRAQ8plex[+304.20536] (N-term)	2	119	8.77874e+06	3.48278e+08	1.84214	2.81893	0.351785	7.16137	rep1	Yes
1	Cluster17067	Peptide	VPLILGIWGGK	881.064	1760.11	1455.91	10	2	4	5.34	0.99	iTRAQ8plex[+304.20536] (K11)	2	26	9.44893e+06	1176363371	0.943085	0.0559361	0.651759	0.0918373	rep2	Yes
1	Cluster17067	Peptide	VPLILGIWGGK	881.064	1760.11	1760.09	2.27	2	2.31	0	0.95	iTRAQ8plex[+304.20536] (N-term); iTRAQ8plex[+304.20536] (K11)	2	34	9.44893e+06	2.70968e+08	0.943083	0.055936	0.651761	0.0918372	rep2	Yes
1	Cluster17067	Peptide	VQLADQYLNEAALGDANADAIGR	1207.6	2413.19	2413.18	0.83	2	2.31	0	0.95	Delta:H(2)C(2)[+26.01565] (N-term)	2	16	7.17603e+06	6.95693e+07	0	0	0	0	rep1	No
1	Cluster17067	Peptide	VQLADQYLNEAALGDANADAIGR	1221.6	2441.18	2441.17	0.82	2	2.31	0	0.95	Formyl[+27.994915] (N-term)	2	6	3.89392e+06	2.55192e+07	0	0	0	0	rep1	No
1	Cluster17067	Peptide	VQLADQYLNEAALGDANADAIGR	1230.11	2458.21	2458.21	0	2	2.31	0	0.95	Carbamyl[+43.005814] (N-term)	2	3	2.03943e+06	1.0898e+07	0	0	0	0	rep1	No
1	Cluster17067	Peptide	VQLADQYLNEAALGDANADAIGR	1346.69	2691.37	2387.17	10	2	6.87	7.39	1		2	107	2.01895e+07	3.92858e+09	0	0	0	0	rep2	No
1	Cluster17067	Peptide	VQLADQYLNEAALGDANADAIGR	745.4	2977.57	2977.58	2.69	4	2.61	0	0.95	iTRAQ8plex[+304.20536] (N-term); iTRAQ8plex[+304.20536] (Y7); Glu->pyro-Glu[-18.010565] (D15)	2	1	1.82392e+07	1.82392e+07	111.704	0.085259	0.615337	0.223979	rep2	Yes
1	Cluster17067	Peptide	VQLADQYLNEAALGDANADAIGR	750.402	2997.58	2997.59	2.67	4	2.61	0	0.95	iTRAQ8plex[+304.20536] (N-term); iTRAQ8plex[+304.20536] (Y7); Deamidated[+0.984016] (Q6); Deamidated[+0.984016] (N9)	2	1	2.793e+07	2.793e+07	0.666995	4.21951	41.8645	1.11939	rep2	Yes
1	Cluster17067	Peptide	VQLADQYLNEAALGDANADAIGR	607.712	3033.52	3033.53	2.31	5	2.61	0	0.95	iTRAQ8plex[+304.20536] (N-term); iTRAQ8plex[+304.20536] (Y7); Cation:K[+37.955882] (E10)	2	1	1.25843e+07	1.25843e+07	1.57133	3.84204	0.368249	47.3892	rep1	Yes
1	Cluster17067	Peptide	VQLADQYLNEAALGDANADAIGR	1359.7	2717.39	2717.39	2.21	2	2.31	0	0.95	Delta:H(2)C(2)[+26.01565] (N-term); iTRAQ8plex[+304.20536] (Y7)	2	1	1.89188e+06	1.89188e+06	1.1128	7.42176	21.4677	3.88409	rep2	Yes
1	Cluster17067	Peptide	VQLADQYLNEAALGDANADAIGR	999.86	2996.56	2996.56	2.2	3	2.41	0	0.95	iTRAQ8plex[+304.20536] (N-term); iTRAQ8plex[+304.20536] (Y7); Deamidated[+0.984016] (N9)	2	7	1.77612e+07	1.34105e+08	1.18533	0.125153	0.682197	0.0199039	rep2	Yes
1	Cluster17067	Peptide	VQLADQYLNEAALGDANADAIGR	755.397	3017.56	3017.56	2.12	4	2.61	0	0.95	iTRAQ8plex[+304.20536] (N-term); iTRAQ8plex[+304.20536] (Y7); Cation:Na[+21.981943] (E10)	2	2	2.92303e+07	4.73608e+07	2.16085	0.0197984	0.123178	33.1054	rep1	Yes
1	Cluster17067	Peptide	VQLADQYLNEAALGDANADAIGR	1498.79	2995.56	2995.57	2	2	2.31	0	0.95	iTRAQ8plex[+304.20536] (N-term); iTRAQ8plex[+304.20536] (Y7)	2	112	1.0214e+06	8.84518e+08	1.5818	4.8583	0.290394	1.88429	rep1	Yes
1	Cluster17067	Peptide	VQLADQYLNEAALGDANADAIGR	683.337	2729.32	2729.32	1.76	4	2.61	0	0.95	iTRAQ8plex[+304.20536] (N-term); Cation:K[+37.955882] (E10)	2	2	2.01019e+07	2.87031e+07	0.0120992	0.178369	4.66977	19.4628	rep2	Yes
1	Cluster17067	Peptide	VQLADQYLNEAALGDANADAIGR	892.451	2674.33	2674.33	1.35	3	2.41	0	0.95	iTRAQ8plex[+304.20536] (N-term); Gln->pyro-Glu[-17.026549] (N9)	2	1	1.77405e+07	1.77405e+07	0.00836128	0.170138	0.613238	0.277822	rep2	Yes
1	Cluster17067	Peptide	VQLADQYLNEAALGDANADAIGR	892.13	2673.37	2673.37	1.35	3	2.41	0	0.95	iTRAQ8plex[+304.20536] (N-term); Glu->pyro-Glu[-18.010565] (E10)	2	4	7.05617e+06	6.29592e+07	0.0184064	0.188193	0.667088	0.319638	rep2	Yes
1	Cluster17067	Peptide	VQLADQYLNEAALGDANADAIGR	892.129	2673.36	2673.37	1.23	3	2.41	0	0.95	iTRAQ8plex[+304.20536] (N-term); Glu->pyro-Glu[-18.010565] (D5)	2	1	5.89654e+06	5.89654e+06	1.20007	0.521647	0.62795	0.406058	rep2	Yes
1	Cluster17067	Peptide	VQLADQYLNEAALGDANADAIGR	892.13	2673.37	2673.37	1.12	3	2.41	0	0.95	iTRAQ8plex[+304.20536] (N-term); Glu->pyro-Glu[-18.010565] (D19)	2	7	2.94233e+07	1.50315e+08	0.013353	0.0673309	73.2723	0.120989	rep1	Yes
1	Cluster17067	Peptide	VQLADQYLNEAALGDANADAIGR	905.791	2714.35	2714.35	1.11	3	2.41	0	0.95	iTRAQ8plex[+304.20536] (N-term); Cation:Na[+21.981943] (E10); Deamidated[+0.984016] (N17)	2	1	2.28786e+07	2.28786e+07	0.0154517	17.4974	27.9021	0.161546	rep1	Yes
1	Cluster17067	Peptide	VQLADQYLNEAALGDANADAIGR	1337.69	2673.36	2673.36	0.75	2	2.31	0	0.95	iTRAQ8plex[+304.20536] (N-term); Glu->pyro-Glu[-18.010565] (D15)	2	8	3.02211e+06	7.96362e+07	0.020111	5.63172	55.2235	4.27472	rep1	Yes
1	Cluster17067	Peptide	VQLADQYLNEAALGDANADAIGR	1347.19	2692.37	2692.35	0.74	2	2.31	0	0.95	iTRAQ8plex[+304.20536] (N-term); Deamidated[+0.984016] (N17)	2	20	8.35551e+06	1.27342e+08	0.011892	3.08425	0.398438	2.05616	rep1	Yes
1	Cluster17067	Peptide	VQLADQYLNEAALGDANADAIGR	1346.7	2691.38	2691.37	0.74	2	2.31	0	0.95	iTRAQ8plex[+304.20536] (N-term)	2	271	1.34185e+07	2278988888	3.33826	1.72736	104.666	1.65368	rep1	Yes
1	Cluster17067	Peptide	VQLADQYLNEAALGDANADAIGR	1347.19	2692.36	2692.35	0.74	2	2.31	0	0.95	iTRAQ8plex[+304.20536] (N-term); Deamidated[+0.984016] (N9)	2	17	1.32061e+07	198593614	0.0242924	11.3376	87.6529	1.53547	rep1	Yes
1	Cluster17067	Peptide	VQLADQYLNEAALGDANADAIGR	804.057	2409.15	2409.15	0.62	3	2.41	0	0.95	iTRAQ8plex[+304.20536] (N-term); Cation:Na[+21.981943] (E10)	2	5	2.10743e+07	7.14983e+07	10.5491	0.0928817	0.00305306	1.46675	rep1	Yes
1	Cluster17067	Peptide	VQLADQYLNEAALGDANADAIGR	898.79	2693.35	2693.37	0.56	3	2.41	0	0.95	iTRAQ8plex[+304.20536] (N-term); Deamidated[+0.984016] (N9); Deamidated[+0.984016] (N17)	2	3	1.97886e+07	2.75176e+07	0.0186717	0.0954003	0.403276	2.52909	rep1	Yes
1	Cluster17067	Peptide	VYDDEVR	600.313	1198.61	894.408	10	2	3.13	2.96	0.95		2	18	1.02948e+08	1.36512e+09	0	0	0	0	rep2	No
1	Cluster17067	Peptide	VYDDEVR	752.413	1502.81	1502.82	2.93	2	2.31	0	0.95	iTRAQ8plex[+304.20536] (N-term); iTRAQ8plex[+304.20536] (Y2)	2	8	4.53266e+06	6.14484e+07	1.15789	0.428029	0.543201	184.7	rep2	Yes
1	Cluster17067	Peptide	VYDDEVR	600.312	1198.61	894.407	2.46	2	2.31	0	0.95	iTRAQ8plex[+304.20536] (N-term)	2	105	5.61046e+06	1275827990	0.0348026	0.115339	74.7023	11.5769	rep2	Yes
1	Cluster17067	Peptide	VYDDEVRK	544.645	1630.91	1326.71	10	3	4.72	6.36	1	iTRAQ8plex[+304.20536] (K8)	2	30	2.64634e+07	1340905123	1.12865	3.777	38.5628	2.65553	rep2	Yes
1	Cluster17067	Peptide	VYDDEVRK	677.367	1352.72	1352.72	2.81	2	2.31	0	0.95	Delta:H(2)C(2)[+26.01565] (N-term); iTRAQ8plex[+304.20536] (K8)	2	2	1.56646e+07	4.33722e+07	1.19033	0.374272	0.554553	181.448	rep2	Yes
1	Cluster17067	Peptide	VYDDEVRK	816.462	1630.91	1630.91	2.21	2	2.31	0	0.95	iTRAQ8plex[+304.20536] (N-term); iTRAQ8plex[+304.20536] (K8)	2	23	11276379	3.80962e+08	0.0122131	0.331519	0.596852	1.89615	rep2	Yes
1	Cluster17067	Peptide	WKGLAYDTSDDQQDITR	786.723	2357.14	2357.15	2.55	3	2.41	0	0.95	iTRAQ8plex[+304.20536] (N-term); iTRAQ8plex[+304.20536] (K2)	2	1	8.96732e+06	8.96732e+06	0.0294427	0.0842554	38.1767	17.4508	rep2	Yes
2	Cluster17079	Peptide	AAQQVNLPVPEGCTDPAAK	1282.18	2562.34	2562.34	1.56	2	2.31	0	0.95	iTRAQ8plex[+304.20536] (N-term); iTRAQ8plex[+304.20536] (K19); Methylthio (C13)	2	1	3.01024e+06	3.01024e+06	0.99168	0.130875	0.703503	4.25251	rep2	Yes
2	Cluster17079	Peptide	EGPPKFEQPEMTLDK	886.822	2657.45	2353.24	9.5	3	4.73	4.86	1	iTRAQ8plex[+304.20536] (K5); iTRAQ8plex[+304.20536] (K15)	2	1	3.17936e+07	3.17936e+07	1.95131	2.97566	0.64914	2.17829	rep1	Yes
2	Cluster17079	Peptide	FEQPEMTLDK	923.497	1844.98	1540.78	10	2	3.91	4.11	0.95	iTRAQ8plex[+304.20536] (K10)	2	4	1.30876e+07	2.3217e+08	0.930418	0.0949879	0.58202	0.0687691	rep2	Yes
2	Cluster17079	Peptide	FEQPEMTLDK	923.497	1844.98	1844.98	1.84	2	2.31	0	0.95	iTRAQ8plex[+304.20536] (N-term); iTRAQ8plex[+304.20536] (K10)	2	1	1.30876e+07	1.30876e+07	0.930418	0.094988	0.582019	0.0687691	rep2	Yes
2	Cluster17079	Peptide	FVEGLGVEK	793.473	1584.93	1280.73	9.5	2	4.07	4.52	0.97	iTRAQ8plex[+304.20536] (K9)	2	46	4.37375e+07	5978476463	1.19282	5.66706	0.360118	1.54318	rep1	Yes
2	Cluster17079	Peptide	FYWAPTREDR	822.925	1643.84	1339.63	10	2	2.8	1.9	0.95		2	2	8.77635e+06	1.12622e+07	0	0	0	0	rep1	No
2	Cluster17079	Peptide	GLAYDISDDQQDITR	1007.5	2012.99	1708.79	10	2	6.28	6.38	1		2	64	7.03849e+06	2.58933e+09	0	0	0	0	rep2	No
2	Cluster17079	Peptide	GLAYDISDDQQDITR	683.321	2046.94	2046.94	2.64	3	2.41	0	0.95	iTRAQ8plex[+304.20536] (N-term); Chloro[+33.961027685] (Y4)	2	2	1.64969e+07	2.13404e+07	2.21968	0.12889	52.0602	1.33699	rep2	Yes
2	Cluster17079	Peptide	GLAYDISDDQQDITR	779.389	2335.14	2335.15	2.57	3	2.41	0	0.95	iTRAQ8plex[+304.20536] (N-term); iTRAQ8plex[+304.20536] (S7)	2	4	1.19016e+07	5.54277e+07	1.20614	0.238333	0.628021	301.862	rep2	Yes
2	Cluster17079	Peptide	GLAYDISDDQQDITR	1007.48	2012.95	2012.95	1.99	2	2.31	0	0.95	iTRAQ8plex[+304.20536] (N-term); Glu->pyro-Glu[-18.010565] (D12)	2	1	2.27857e+06	2.27857e+06	61.4113	26.2838	0.604381	197.237	rep2	Yes
2	Cluster17079	Peptide	GLAYDISDDQQDITR	1168.59	2335.15	2317.2	1.73	2	2.31	0	0.95	iTRAQ8plex[+304.20536] (N-term); iTRAQ8plex[+304.20536] (Y4)	2	19	2.1078e+06	1.33965e+08	0.992853	0.361172	0.596529	2.98218	rep2	Yes
2	Cluster17079	Peptide	GLAYDISDDQQDITR	666.002	1994.98	1994.99	1.35	3	2.41	0	0.95	iTRAQ8plex[+304.20536] (N-term); Glu->pyro-Glu[-18.010565] (S7)	2	2	3.21037e+07	5.9719e+07	1.65802	2.33618	0.385169	2.16671	rep1	Yes
2	Cluster17079	Peptide	GLAYDISDDQQDITR	666.002	1994.98	1994.98	1.35	3	2.41	0	0.95	iTRAQ8plex[+304.20536] (N-term); Glu->pyro-Glu[-18.010565] (D9)	2	1	3.55796e+07	3.55796e+07	1.89191	5.37873	84.5751	0.149109	rep1	Yes
2	Cluster17079	Peptide	GLAYDISDDQQDITR	701.328	2100.96	2100.96	1.29	3	2.41	0	0.95	iTRAQ8plex[+304.20536] (N-term); Cation:K[+37.955882] (D8)	2	1	2.05312e+07	2.05312e+07	2.54585	3.54806	0.233311	2.2745	rep1	Yes
2	Cluster17079	Peptide	GLAYDISDDQQDITR	998.502	1994.99	1994.98	1.2	2	2.31	0	0.95	iTRAQ8plex[+304.20536] (N-term); Glu->pyro-Glu[-18.010565] (T14)	2	2	4.1307e+06	3.26491e+07	1.35468	0.114455	36.8914	3.95102	rep2	Yes
2	Cluster17079	Peptide	GLAYDISDDQQDITR	1007.5	2012.99	1997	1	2	2.31	0	0.95	iTRAQ8plex[+304.20536] (N-term)	2	168	3.57485e+06	1103455881	0.0148834	0.150541	0.599092	2.51981	rep2	Yes
2	Cluster17079	Peptide	GLAYDISDDQQDITR	1018.49	2034.97	2034.97	0.98	2	2.31	0	0.95	iTRAQ8plex[+304.20536] (N-term); Cation:Na[+21.981943] (D5)	2	1	4.50751e+06	4.50751e+06	79.6219	7.54649	0.656992	0.049756	rep2	Yes
2	Cluster17079	Peptide	GLAYDISDDQQDITR	1057.51	2113.01	2113.01	0.95	2	2.31	0	0.95	iTRAQ8plex[+304.20536] (N-term); Deamidated[+0.984016] (Q11)	2	1	5.08665e+06	5.08665e+06	1.13361	11.3494	0.571495	5.5014	rep2	Yes
2	Cluster17079	Peptide	IKDEDIVK	936.578	1871.14	1566.94	9.5	2	3.48	4.45	0.96	iTRAQ8plex[+304.20536] (K2); iTRAQ8plex[+304.20536] (K8)	2	1	5.03285e+06	5.03285e+06	1.4241	1.80937	0.39386	520.768	rep1	Yes
2	Cluster17079	Peptide	IKDEDIVK	936.578	1871.14	1871.15	1.82	2	2.31	0	0.95	iTRAQ8plex[+304.20536] (N-term); iTRAQ8plex[+304.20536] (K2); iTRAQ8plex[+304.20536] (K8)	2	2	5.03285e+06	2.41875e+07	1.4241	1.80937	0.39386	520.769	rep1	Yes
2	Cluster17079	Peptide	LVDQFPGQSIDFFGALR	1107.6	2213.17	1908.97	10	2	5.12	5.35	0.99		2	11	1.14832e+08	6.67252e+08	0	0	0	0	rep1	No
2	Cluster17079	Peptide	LVDQFPGQSIDFFGALR	738.733	2213.18	1908.98	1.89	3	2.41	0	0.95	iTRAQ8plex[+304.20536] (N-term)	2	6	2.26824e+07	6.11823e+07	0.0117534	7.79691	23.6257	2.02219	rep2	Yes
2	Cluster17079	Peptide	LVVHITKNFLTLPNIKVPLILGIWGGK	630.37	3146.81	3146.84	8.98	5	3.18	1.89	1	Phospho[+79.966331] (T6); Dimethyl[+28.0313] (K7); Acetyl[+42.010565] (K16); Methyl[+14.01565] (K27)	2	1	1.70421e+06	1.70421e+06	0	0	0	0	rep2	No
2	Cluster17079	Peptide	MCVLFINDLDAGAGR	648.991	1943.95	1940.05	1.7	3	2.41	0	0.95	iTRAQ8plex[+304.20536] (N-term); Methylthio (C2)	2	5	9.78688e+06	2.48611e+07	0.0289608	0.192955	0.670411	6.49615	rep2	Yes
2	Cluster17079	Peptide	QTDGDR	498.255	994.494	690.293	10	2	2.36	1.79	0.95		2	1	808256	808256	0	0	0	0	rep1	No
2	Cluster17079	Peptide	QTDGDRWR	669.346	1336.68	1336.68	1.65	2	2.31	0	0.95	iTRAQ8plex[+304.20536] (N-term)	2	2	2.47867e+07	3.06157e+07	0.895159	1.51701	0.140895	0.973943	rep1	Yes
2	Cluster17079	Peptide	QYNLDNMMDGLYIAPAFMDK	986.826	2957.45	2653.25	9.5	3	5.68	7.71	1	iTRAQ8plex[+304.20536] (K20)	2	19	8.36565e+07	5.71388e+08	6.13574	13.0264	0.423785	0.216307	rep1	Yes
2	Cluster17079	Peptide	QYNLDNMMDGLYIAPAFMDK	986.824	2957.45	2653.24	2.15	3	2.41	0	0.95	iTRAQ8plex[+304.20536] (N-term); iTRAQ8plex[+304.20536] (K20)	2	32	9.92849e+06	4.27194e+08	1.80601	0.04272	65.7173	0.114232	rep1	Yes
2	Cluster17079	Peptide	QYNLDNMMDGLYIAPAFMDK	816.42	3261.65	3260.67	1.96	4	2.61	0	0.95	iTRAQ8plex[+304.20536] (N-term); iTRAQ8plex[+304.20536] (K20); iTRAQ8plex[+304.20536] (Y12)	2	22	1.24544e+07	200694863	0.527729	2.15845	48.4997	0.213202	rep1	Yes
2	Cluster17079	Peptide	QYNLDNMMDGLYIAPAFMDK	981.148	2940.42	2940.42	1.22	3	2.41	0	0.95	Gln->pyro-Glu[-17.026549] (N-term); iTRAQ8plex[+304.20536] (K20); iTRAQ8plex[+304.20536] (Y2)	2	2	2.06476e+07	3.37915e+07	0.00837201	0.160662	0.606637	0.411638	rep2	Yes
2	Cluster17079	Peptide	QYNLDNMMDGLYIAPAFMDK	740.618	2958.44	2958.44	1.22	4	2.61	0	0.95	iTRAQ8plex[+304.20536] (N-term); iTRAQ8plex[+304.20536] (K20); Deamidated[+0.984016] (N3)	2	1	2.27342e+07	2.27342e+07	2.61086	4.22765	92.2427	0.371383	rep1	Yes
2	Cluster17079	Peptide	QYNLDNMMDGLYIAPAFMDK	894.094	2679.26	2679.26	1.12	3	2.41	0	0.95	Delta:H(2)C(2)[+26.01565] (N-term); iTRAQ8plex[+304.20536] (K20)	2	3	2.43406e+07	6.04582e+07	0.0358185	3.896	80.2586	56.6196	rep1	Yes
2	Cluster17079	Peptide	QYNLDNMMDGLYIAPAFMDK	987.152	2958.43	2972.58	1.01	3	2.41	0	0.95	iTRAQ8plex[+304.20536] (N-term); iTRAQ8plex[+304.20536] (K20); Deamidated[+0.984016] (N6)	2	3	2.96589e+07	7.09918e+07	0.0162322	0.024953	175.144	0.227608	rep1	Yes
2	Cluster17079	Peptide	RVQLADQSLNEAALGDANADAIGR	814.734	2441.18	2441.18	1.47	3	2.41	0	0.95	iTRAQ8plex[+304.20536] (N-term)	2	4	4.49823e+06	1.65177e+07	1.09042	0.701349	36.3958	20.036	rep2	Yes
2	Cluster17079	Peptide	RVQLADQSLNEAALGDANADAIGR	814.371	2440.09	2440.09	0.61	3	2.41	0	0.95	iTRAQ8plex[+304.20536] (N-term); Deamidated[+0.984016] (Q3)	2	1	5.59794e+06	5.59794e+06	0.010725	1.69692	1.34014	2.15182	rep1	Yes
2	Cluster17079	Peptide	RVQLADQSLNEAALGDANADAIGR	814.735	2441.18	2441.18	0.61	3	2.41	0	0.95	iTRAQ8plex[+304.20536] (N-term); Deamidated[+0.984016] (Q3); Deamidated[+0.984016] (Q7)	2	2	1.449e+07	2.31581e+07	1.63713	2.23437	0.764173	3.71338	rep1	Yes
2	Cluster17079	Peptide	RVQLADQSLNEAALGDANADAIGR	932.801	2795.38	2795.38	0.54	3	2.41	0	0.95	iTRAQ8plex[+304.20536] (N-term); Deamidated[+0.984016] (N18)	2	2	4.65225e+06	6.80844e+06	0.0491951	5.53132	0.375158	0.103099	rep1	Yes
2	Cluster17079	Peptide	VPIIVTGNDFSTLYAPLIR	1197.19	2392.36	2088.16	10	2	5.59	7.22	1		2	89	1.91258e+08	4.60154e+09	0	0	0	0	rep1	No
2	Cluster17079	Peptide	VQLADQSLNEAALGDANADAIGR	745.396	2977.55	2977.56	2.69	4	2.61	0	0.95	iTRAQ8plex[+304.20536] (N-term); Deamidated[+0.984016] (N9)	2	1	1.18582e+07	1.18582e+07	118.337	8.69481	0.597136	0.282254	rep2	Yes
2	Cluster17079	Peptide	VQLADQSLNEAALGDANADAIGR	749.183	2992.7	2992.71	2.67	4	2.61	0	0.95	iTRAQ8plex[+304.20536] (N-term); iTRAQ8plex[+304.20536] (S7)	2	1	4.08761e+07	4.08761e+07	1.00091	0.12455	0.624942	0.133463	rep2	Yes
2	Cluster17079	Peptide	VQLADQSLNEAALGDANADAIGR	999.198	2994.57	2994.57	1.8	3	2.41	0	0.95	iTRAQ8plex[+304.20536] (N-term)	2	1	4.9357e+06	4.9357e+06	1.03154	6.86996	0.571137	3.03766	rep2	Yes
2	Cluster17079	Peptide	VQLADQSLNEAALGDANADAIGR	849.435	2545.28	2545.28	1.3	3	2.41	0	0.95	iTRAQ8plex[+304.20536] (N-term); Deamidated[+0.984016] (Q2)	2	1	4.58424e+06	4.58424e+06	1.21955	0.761102	0.696424	0.577271	rep2	Yes
2	Cluster17079	Peptide	VQLADQSLNEAALGDANADAIGR	983.829	2948.46	2948.46	0.41	3	2.41	0	0.95	iTRAQ8plex[+304.20536] (N-term); iTRAQ8plex[+304.20536] (S7); Deamidated[+0.984016] (N9)	2	1	744818	744818	1.70358	7.71077	0.398639	0.537753	rep1	Yes
2	Cluster17079	Peptide	VYDDEVR	600.313	1198.61	894.408	10	2	3.13	2.96	0.95		2	18	1.02948e+08	1.36512e+09	0	0	0	0	rep2	No
3	Cluster19523	Peptide	DEDIVTLVDQFPGQSIDFFGALR	962.832	2885.48	2581.27	10	3	5.82	7.04	1		2	6	3.92062e+07	1.91102e+08	0	0	0	0	rep2	No
3	Cluster19523	Peptide	EAADLIK	684.419	1366.82	1062.62	10	2	3.48	4.17	0.95	iTRAQ8plex[+304.20536] (K7)	2	13	2.38519e+07	3178056790	1.1155	0.155357	57.646	0.952345	rep2	Yes
3	Cluster19523	Peptide	EAADLIK	684.42	1366.82	1366.73	2.63	2	2.31	0	0.95	iTRAQ8plex[+304.20536] (N-term); iTRAQ8plex[+304.20536] (K7)	2	17	1.75985e+07	1.23887e+08	1.06641	0.172598	0.606841	0.0119262	rep2	Yes
3	Cluster19523	Peptide	EAADLIKK	513.32	1536.94	1232.73	10	3	3.53	3.56	0.95	Acetyl[+42.010565] (K7); iTRAQ8plex[+304.20536] (K8)	2	3	5.86439e+07	2.1038e+08	1.14459	4.33815	62.0735	5.77819	rep2	Yes
3	Cluster19523	Peptide	EAADLIKK	499.313	1494.91	1190.72	10	3	3.03	2.81	0.95	iTRAQ8plex[+304.20536] (K8)	2	2	6.34248e+07	1.47602e+08	0.985073	0.268718	58.5633	4.53202	rep2	Yes
3	Cluster19523	Peptide	EGPPLFEQPEMTLEK	785.089	2352.24	2048.04	9.5	3	3.55	2.54	0.95	iTRAQ8plex[+304.20536] (K15)	2	1	5.25816e+07	5.25816e+07	14.6026	1.09168	0.400462	1.20459	rep1	Yes
3	Cluster19523	Peptide	EGPPLFEQPEMTLEK	785.087	2352.24	2352.21	2.42	3	2.41	0	0.95	iTRAQ8plex[+304.20536] (N-term); iTRAQ8plex[+304.20536] (K15)	2	1	3.01039e+07	3.01039e+07	62.7266	0.0793139	0.647894	137.459	rep2	Yes
3	Cluster19523	Peptide	EGPPLFEQPEMTLEK	1183.13	2364.24	2364.24	1.69	2	2.31	0	0.95	iTRAQ8plex[+304.20536] (N-term); iTRAQ8plex[+304.20536] (K15); Glu->pyro-Glu[-18.010565] (E1)	2	3	2.04055e+07	4.44777e+07	6.37172	1.3551	0.351342	0.959944	rep1	Yes
3	Cluster19523	Peptide	FVEGLGVEKISK	639.71	1916.11	1916.11	1.57	3	2.41	0	0.95	iTRAQ8plex[+304.20536] (N-term); iTRAQ8plex[+304.20536] (K9); iTRAQ8plex[+304.20536] (K12)	2	2	1.78953e+07	2.69401e+07	3.73147	0.891235	0.168539	10.2044	rep1	Yes
3	Cluster19523	Peptide	FYWAPTREDR	822.925	1643.84	1339.63	10	2	2.8	1.9	0.95		2	2	8.77635e+06	1.12622e+07	0	0	0	0	rep1	No
3	Cluster19523	Peptide	GLAYDISDDQQDITR	1007.5	2012.99	1708.79	10	2	6.28	6.38	1		2	64	7.03849e+06	2.58933e+09	0	0	0	0	rep2	No
3	Cluster19523	Peptide	GTFFGQTTGQA	709.863	1417.71	1113.51	10	2	3.19	4.29	0.95		2	5	5.14728e+07	1.556e+08	0	0	0	0	rep1	No
3	Cluster19523	Peptide	GTFFGQTTGQA	716.871	1431.73	1417.71	0.71	2	2.31	0	0.95	iTRAQ8plex[+304.20536] (N-term)	2	10	1.37669e+07	1.79154e+08	2.16041	1.62599	17.0439	69.7216	rep1	Yes
3	Cluster19523	Peptide	LMEYGNMLVMEQDNVK	841.434	2521.28	2217.08	10	3	4.96	6.01	1	iTRAQ8plex[+304.20536] (K16)	2	8	9.20316e+06	161290125	1.14428	0.165716	0.616604	0.226752	rep2	Yes
3	Cluster19523	Peptide	LMEYGNMLVMEQDNVK	841.433	2521.28	2521.26	2.26	3	2.41	0	0.95	iTRAQ8plex[+304.20536] (N-term); iTRAQ8plex[+304.20536] (K16)	2	19	6.75993e+06	2.10773e+08	1.29767	0.0993793	21.614	57.0797	rep2	Yes
3	Cluster19523	Peptide	LMEYGNMLVMEQDNVK	942.838	2825.49	2825.5	2.02	3	2.41	0	0.95	iTRAQ8plex[+304.20536] (N-term); iTRAQ8plex[+304.20536] (K16); iTRAQ8plex[+304.20536] (Y4)	2	1	4.17463e+06	4.17463e+06	1.00298	0.0890237	0.659056	0.0672853	rep2	Yes
3	Cluster19523	Peptide	MCCLFINDLDAGAGR	856.893	1711.77	1720.64	0.58	2	2.31	0	0.95	Carbamyl[+43.005814] (N-term); Methylthio (C2); Methylthio (C3)	2	2	4.91911e+06	6.40807e+06	0	0	0	0	rep1	No
3	Cluster19523	Peptide	QTDGDR	498.255	994.494	690.293	10	2	2.36	1.79	0.95		2	1	808256	808256	0	0	0	0	rep1	No
3	Cluster19523	Peptide	RVQLADQYLNEAALGDANADAIGR	950.165	2847.48	2543.27	10	3	7.27	7.95	1		2	15	2.71103e+07	3.74852e+08	0	0	0	0	rep2	No
3	Cluster19523	Peptide	TDKIKDEDIVTLVDQFPGQSIDFFGALR	941	3759.97	3745.96	2.35	4	2.61	0	0.95	iTRAQ8plex[+304.20536] (N-term); iTRAQ8plex[+304.20536] (K3); iTRAQ8plex[+304.20536] (K5)	2	2	1.47981e+06	7.53454e+06	1.18219	7.50018	0.53455	0.852651	rep2	Yes
3	Cluster19523	Peptide	VPIIVTGNDFSTLYAPLIR	1197.19	2392.36	2088.16	10	2	5.59	7.22	1		2	89	1.91258e+08	4.60154e+09	0	0	0	0	rep1	No
3	Cluster19523	Peptide	VPLILGVWGGK	583.04	1746.09	1441.9	10	3	4.24	7.21	1	iTRAQ8plex[+304.20536] (K11)	2	55	6.12465e+07	3352671320	0.948228	0.0521221	0.704291	0.0377361	rep2	Yes
3	Cluster19523	Peptide	VPLILGVWGGK	764.962	1527.91	1527.91	2.49	2	2.31	0	0.95	Carbamyl[+43.005814] (N-term); iTRAQ8plex[+304.20536] (K11)	2	1	2.73093e+06	2.73093e+06	0.975001	7.5248	0.00973786	0.310962	rep2	Yes
3	Cluster19523	Peptide	VPLILGVWGGK	876.054	1750.09	1750.1	2.29	2	2.31	0	0.95	iTRAQ8plex[+304.20536] (N-term); iTRAQ8plex[+304.20536] (K11); Trp->Kynurenin[+3.994915] (W8)	2	1	6.08174e+06	6.08174e+06	1.10346	0.189416	0.653961	34.3372	rep2	Yes
3	Cluster19523	Peptide	VPLILGVWGGK	874.056	1746.1	1746.1	2.29	2	2.31	0	0.95	iTRAQ8plex[+304.20536] (N-term); iTRAQ8plex[+304.20536] (K11)	2	70	6.14538e+06	5.90652e+08	1.05638	0.0858892	0.643325	0.15297	rep2	Yes
3	Cluster19523	Peptide	VPLILGVWGGKGQGK	530.081	2116.29	1812.09	10	4	3.61	1.43	0.99	iTRAQ8plex[+304.20536] (K15)	2	1	5.64289e+06	5.64289e+06	91.9918	0.193531	0.737037	79.5489	rep2	Yes
3	Cluster19523	Peptide	VQLADQYLNEAALGDANADAIGR	822.063	2463.16	2463.17	0.61	3	2.42	0	0.95	Acetyl[+42.010565] (N-term)	2	1	5.21523e+06	5.21523e+06	0	0	0	0	rep1	No
3	Cluster19523	Peptide	VQLADQYLNEAALGDANADAIGR	1207.6	2413.19	2413.18	0.83	2	2.31	0	0.95	Delta:H(2)C(2)[+26.01565] (N-term)	2	16	7.17603e+06	6.95693e+07	0	0	0	0	rep1	No
3	Cluster19523	Peptide	VQLADQYLNEAALGDANADAIGR	1221.6	2441.18	2441.17	0.82	2	2.31	0	0.95	Formyl[+27.994915] (N-term)	2	6	3.89392e+06	2.55192e+07	0	0	0	0	rep1	No
3	Cluster19523	Peptide	VQLADQYLNEAALGDANADAIGR	1230.11	2458.21	2458.21	0	2	2.31	0	0.95	Carbamyl[+43.005814] (N-term)	2	3	2.03943e+06	1.0898e+07	0	0	0	0	rep1	No
3	Cluster19523	Peptide	VQLADQYLNEAALGDANADAIGR	1346.69	2691.37	2387.17	10	2	6.87	7.39	1		2	107	2.01895e+07	3.92858e+09	0	0	0	0	rep2	No
3	Cluster19523	Peptide	VYDDEVR	600.313	1198.61	894.408	10	2	3.13	2.96	0.95		2	18	1.02948e+08	1.36512e+09	0	0	0	0	rep2	No
3	Cluster19523	Peptide	YREAADLIK	563.003	1685.99	1381.79	9.5	3	3.58	2.92	0.95	iTRAQ8plex[+304.20536] (K9)	2	1	3.14828e+07	3.14828e+07	1.0837	3.38858	0.254929	2.23423	rep1	Yes
4	Cluster16821	Peptide	ALAALRLEDLR	515.651	1543.93	1239.73	10	3	2.65	2.54	0.95		2	2	1.64783e+07	3.02952e+07	0	0	0	0	rep2	No
4	Cluster16821	Peptide	ALAALRLEDLR	515.652	1543.93	1543.94	1.36	3	2.41	0	0.95	iTRAQ8plex[+304.20536] (N-term)	2	1	7.14055e+06	7.14055e+06	5.5253	0.0258326	72.5139	1.67899	rep1	Yes
4	Cluster16821	Peptide	AMHAVIDR	608.841	1215.67	911.465	10	2	3.18	3.13	0.95		2	14	1.31764e+07	3.35064e+08	0	0	0	0	rep2	No
4	Cluster16821	Peptide	AMHAVIDR	432.738	863.461	863.46	1.85	2	2.31	0	0.95	iTRAQ8plex[+304.20536] (N-term); Dethiomethyl[-48.003371] (M2)	2	7	2.65567e+07	1.38562e+08	1.30132	1.25884	0.151266	0.984245	rep1	Yes
4	Cluster16821	Peptide	ASVGFKAGVK	538.669	1612.98	1308.77	9.5	3	3.52	2.79	0.95	Acetyl[+42.010565] (K6); iTRAQ8plex[+304.20536] (K10)	2	1	7.91222e+07	7.91222e+07	1.25133	0.102607	0.344142	5.7271	rep1	Yes
4	Cluster16821	Peptide	ASVGFKAGVK	524.66	1570.96	1266.76	9.5	3	2.99	4.37	1	iTRAQ8plex[+304.20536] (K10)	2	1	5.72461e+07	5.72461e+07	1.5475	3.61219	26.3453	11.2786	rep1	Yes
4	Cluster16821	Peptide	AVYECLR	754.414	1506.81	1506.81	3.05	2	2.31	0	0.95	iTRAQ8plex[+304.20536] (N-term); iTRAQ8plex[+304.20536] (Y3); Methylthio (C5)	2	19	4.54557e+06	1.85525e+08	127.246	11.825	0.569688	10.0917	rep2	Yes
4	Cluster16821	Peptide	AVYECLR	602.311	1202.61	1202.61	2.99	2	2.31	0	0.95	iTRAQ8plex[+304.20536] (N-term); Methylthio (C5)	2	100	1.77248e+07	1021900848	1.17832	0.100942	0.597541	0.186059	rep2	Yes
4	Cluster16821	Peptide	DDENVNSQPFMR	739.321	1476.63	1476.63	0.81	2	2.31	0	0.95	Delta:H(2)C(2)[+26.01565] (N-term)	2	3	1.43974e+07	4.58561e+07	0	0	0	0	rep1	No
4	Cluster16821	Peptide	DDENVNSQPFMR	878.417	1754.82	1450.61	10	2	5.13	4.92	0.99		2	6	2.54457e+07	6.91998e+08	0	0	0	0	rep2	No
4	Cluster16821	Peptide	DDENVNSQPFMR	886.415	1770.81	1466.61	10	2	3.22	2.71	0.95	Oxidation[+15.994915] (M11)	2	8	1.01107e+07	9.40524e+08	0	0	0	0	rep2	No
4	Cluster16821	Peptide	DDENVNSQPFMR	726.314	1450.61	1450.62	0.83	2	2.31	0	0.95	iTRAQ8plex[+304.20536] (N-term)	2	3	2.41473e+07	5.98253e+07	0.428461	0.619442	12.5674	2.15308	rep1	Yes
4	Cluster16821	Peptide	DDYVEK	688.877	1375.74	1071.54	10	2	2.84	3.26	0.95	iTRAQ8plex[+304.20536] (K6)	2	26	3.23998e+07	2373349901	0.0163444	0.0751742	35.0426	0.691538	rep2	Yes
4	Cluster16821	Peptide	DDYVEK	688.877	1375.74	1375.74	2.91	2	2.31	0	0.95	iTRAQ8plex[+304.20536] (N-term); iTRAQ8plex[+304.20536] (K6)	2	24	1.17112e+07	2.97425e+08	109.215	0.39214	0.479361	0.526157	rep2	Yes
4	Cluster16821	Peptide	DDYVEK	840.978	1679.94	1679.94	2.5	2	2.31	0	0.95	iTRAQ8plex[+304.20536] (N-term); iTRAQ8plex[+304.20536] (K6); iTRAQ8plex[+304.20536] (Y3)	2	1	8.72825e+06	8.72825e+06	1.02934	0.170252	0.452491	781.576	rep2	Yes
4	Cluster16821	Peptide	DDYVEKDR	448.563	1342.66	1038.46	10	3	2.92	2.7	0.95		2	1	2.91867e+07	2.91867e+07	0	0	0	0	rep1	No
4	Cluster16821	Peptide	DDYVEKDR	549.963	1646.87	1342.67	9.5	3	3.94	2.82	0.95	iTRAQ8plex[+304.20536] (K6)	2	25	7.51022e+07	2001937992	1.06217	0.863877	0.0413551	1.98677	rep1	Yes
4	Cluster16821	Peptide	DDYVEKDR	824.439	1646.86	1342.67	2.53	2	2.31	0	0.95	iTRAQ8plex[+304.20536] (N-term); iTRAQ8plex[+304.20536] (K6)	2	73	3.03564e+06	5.40019e+08	0.019563	0.102732	0.539055	71.7342	rep2	Yes
4	Cluster16821	Peptide	DDYVEKDR	976.54	1951.06	1951.07	2.46	2	2.31	0	0.95	iTRAQ8plex[+304.20536] (N-term); iTRAQ8plex[+304.20536] (K6); iTRAQ8plex[+304.20536] (Y3)	2	2	5.3102e+06	9.8613e+06	1.27158	0.145565	0.395285	2.86375	rep1	Yes
4	Cluster16821	Peptide	DDYVEKDR	815.434	1628.85	1628.86	2.21	2	2.31	0	0.95	iTRAQ8plex[+304.20536] (N-term); iTRAQ8plex[+304.20536] (K6); Glu->pyro-Glu[-18.010565] (D2)	2	2	2.37858e+06	3.10494e+07	1.30617	0.0974281	28.0187	62.631	rep2	Yes
4	Cluster16821	Peptide	DLAVEGNEIIR	627.837	1253.66	1253.66	0.8	2	2.31	0	0.95	Delta:H(2)C(2)[+26.01565] (N-term)	2	19	8.89751e+06	1.12201e+08	0	0	0	0	rep1	No
4	Cluster16821	Peptide	DLAVEGNEIIR	628.331	1254.65	1254.65	0.96	2	2.31	0	0.95	Delta:H(2)C(2)[+26.01565] (N-term); Deamidated[+0.984016] (N7)	2	1	9.49095e+06	9.49095e+06	0	0	0	0	rep1	No
4	Cluster16821	Peptide	DLAVEGNEIIR	766.931	1531.85	1227.65	10	2	4.45	3.68	0.95		2	122	3.24044e+07	5.85256e+09	0	0	0	0	rep2	No
4	Cluster16821	Peptide	DLAVEGNEIIR	767.424	1532.83	1228.64	3.09	2	2.31	0	0.95	iTRAQ8plex[+304.20536] (N-term); Deamidated[+0.984016] (N7)	2	23	3.52929e+06	1.04135e+08	0.601105	0.0763753	0.63533	1.44743	rep2	Yes
4	Cluster16821	Peptide	DLAVEGNEIIR	766.932	1531.85	1227.64	2.28	2	2.31	0	0.95	iTRAQ8plex[+304.20536] (N-term)	2	192	3.64075e+06	1478780442	0.0188464	7.96325	27.2337	11.5124	rep2	Yes
4	Cluster16821	Peptide	DLAVEGNEIIR	757.927	1513.84	1513.84	1.85	2	2.31	0	0.95	iTRAQ8plex[+304.20536] (N-term); Glu->pyro-Glu[-18.010565] (D1)	2	2	2.55649e+07	4.74691e+07	1.25478	0.166622	0.566012	22.8654	rep2	Yes
4	Cluster16821	Peptide	DLAVEGNEIIR	757.931	1513.85	1513.85	1.72	2	2.31	0	0.95	iTRAQ8plex[+304.20536] (N-term); Glu->pyro-Glu[-18.010565] (E8)	2	1	2.34538e+07	2.34538e+07	1.48064	0.22394	0.562477	12.9879	rep2	Yes
4	Cluster16821	Peptide	DNGLLLHIHR	497.961	1490.86	1186.66	10	3	3.58	4.44	1		2	6	3.37338e+07	1.4322e+08	0	0	0	0	rep1	No
4	Cluster16821	Peptide	DNGLLLHIHR	607.837	1213.66	1213.66	2.47	2	2.31	0	0.95	Delta:H(2)C(2)[+26.01565] (N-term); Deamidated[+0.984016] (N2)	2	6	1.04717e+07	7.04556e+07	0	0	0	0	rep2	No
4	Cluster16821	Peptide	DNGLLLHIHR	644.835	1287.65	1287.66	1.55	2	2.31	0	0.95	Carbamyl[+43.005814] (N-term)	2	1	2.9801e+07	2.9801e+07	0	0	0	0	rep1	No
4	Cluster16821	Peptide	DTDILAAFR	524.277	1046.54	1046.54	2.48	2	2.31	0	0.95	Delta:H(2)C(2)[+26.01565] (N-term)	2	3	5.40949e+06	1.86564e+07	0	0	0	0	rep2	No
4	Cluster16821	Peptide	DTDILAAFR	663.371	1324.72	1020.52	10	2	3.59	3.76	0.95		2	116	1.80704e+07	1.00304e+10	0	0	0	0	rep2	No
4	Cluster16821	Peptide	DTDILAAFR	815.471	1628.93	1628.93	2.21	2	2.31	0	0.95	iTRAQ8plex[+304.20536] (N-term); iTRAQ8plex[+304.20536] (T2)	2	1	6.97672e+06	6.97672e+06	117.921	5.89648	26.6332	14.7965	rep2	Yes
4	Cluster16821	Peptide	DTDILAAFR	663.37	1324.72	1020.51	2.16	2	2.31	0	0.95	iTRAQ8plex[+304.20536] (N-term)	2	153	3.77126e+06	1223588732	1.49114	4.55228	0.288395	0.160791	rep1	Yes
4	Cluster16821	Peptide	EITFNFPTIDK	967.046	1932.08	1627.88	10	2	5.39	6.63	1	iTRAQ8plex[+304.20536] (K11)	2	52	2.49645e+07	2924239055	0.975812	0.0629066	0.487008	30.6365	rep2	Yes
4	Cluster16821	Peptide	EITFNFPTIDK	967.049	1932.08	1627.88	2.58	2	2.31	0	0.95	iTRAQ8plex[+304.20536] (N-term); iTRAQ8plex[+304.20536] (K11)	2	74	7.75077e+06	583945587	1.83073	6.62716	13.9748	20.3656	rep1	Yes
4	Cluster16821	Peptide	EITFNFPTIDK	645.369	1933.08	1933.09	1.86	3	2.41	0	0.95	iTRAQ8plex[+304.20536] (N-term); iTRAQ8plex[+304.20536] (K11); Deamidated[+0.984016] (N5)	2	2	1.3545e+07	2.29566e+07	1.18907	0.0382021	0.542738	1.53863	rep2	Yes
4	Cluster16821	Peptide	EITFNFPTIDK	980.054	1958.09	1958.1	1.84	2	2.31	0	0.95	Delta:H(2)C(2)[+26.01565] (N-term); iTRAQ8plex[+304.20536] (K11); iTRAQ8plex[+304.20536] (T3)	2	3	6.62511e+06	3.56717e+07	0.0138468	0.060035	0.534853	0.153493	rep2	Yes
4	Cluster16821	Peptide	EITFNFPTIDK	958.039	1914.06	1914.07	1.78	2	2.31	0	0.95	iTRAQ8plex[+304.20536] (N-term); iTRAQ8plex[+304.20536] (K11); Glu->pyro-Glu[-18.010565] (T3)	2	2	5.27691e+06	1.04218e+07	140.378	0.191936	0.56445	0.185491	rep2	Yes
4	Cluster16821	Peptide	EITFNFPTIDKLDGQD	733.709	2198.11	1893.9	10	3	4.13	3.94	0.99	Acetyl[+42.010565] (K11)	2	1	1.10111e+07	1.10111e+07	0	0	0	0	rep2	No
4	Cluster16821	Peptide	EITFNFPTIDKLDGQD	821.106	2460.29	2156.09	10	3	4.59	4.41	1	iTRAQ8plex[+304.20536] (K11)	2	39	8.34378e+07	2150930121	1.1991	6.21886	0.5586	2.1325	rep2	Yes
4	Cluster16821	Peptide	EITFNFPTIDKLDGQD	821.43	2461.27	2461.27	2.07	3	2.41	0	0.95	iTRAQ8plex[+304.20536] (N-term); iTRAQ8plex[+304.20536] (K11); Deamidated[+0.984016] (N5)	2	1	8.27789e+06	8.27789e+06	1.15205	0.0828919	0.597827	1.63661	rep2	Yes
4	Cluster16821	Peptide	EITFNFPTIDKLDGQD	825.777	2474.31	2474.31	1.45	3	2.41	0	0.95	iTRAQ8plex[+304.20536] (N-term); iTRAQ8plex[+304.20536] (K11); Pro->pyro-Glu[+13.979265] (E1)	2	1	2.09497e+07	2.09497e+07	0.453945	2.6065	66.6749	198.066	rep1	Yes
4	Cluster16821	Peptide	EITFNFPTIDKLDGQD	815.102	2442.28	2442.28	1.35	3	2.41	0	0.95	iTRAQ8plex[+304.20536] (N-term); iTRAQ8plex[+304.20536] (K11); Glu->pyro-Glu[-18.010565] (T3)	2	2	2.27028e+07	2.46834e+07	1.31441	0.200632	0.553231	1.78669	rep2	Yes
4	Cluster16821	Peptide	EITFNFPTIDKLDGQD	1231.15	2460.29	2156.1	0.93	2	2.31	0	0.95	iTRAQ8plex[+304.20536] (N-term); iTRAQ8plex[+304.20536] (K11)	2	93	9.31072e+06	8.48982e+08	1.27235	0.072915	0.588977	39.3691	rep2	Yes
4	Cluster16821	Peptide	EITFNFPTIDKLDGQD	1222.15	2442.28	2442.29	0.82	2	2.31	0	0.95	iTRAQ8plex[+304.20536] (N-term); iTRAQ8plex[+304.20536] (K11); Glu->pyro-Glu[-18.010565] (D16)	2	4	7.53126e+06	2.32249e+07	1.65786	9.77114	0.451951	31.3282	rep1	Yes
4	Cluster16821	Peptide	ESTLGFVDLLR	616.34	1230.66	1230.67	3.09	2	2.31	0	0.95	Glu->pyro-Glu[-18.010565] (N-term)	2	1	2.20722e+06	2.20722e+06	0	0	0	0	rep2	No
4	Cluster16821	Peptide	ESTLGFVDLLR	646.348	1290.68	1290.68	1.47	2	3.21	3.46	0.95	Acetyl[+42.010565] (S2)	2	1	2.54857e+06	2.54857e+06	0	0	0	0	rep1	No
4	Cluster16821	Peptide	ESTLGFVDLLR	646.348	1290.68	1290.68	0.77	2	2.31	0	0.95	Acetyl[+42.010565] (N-term)	2	1	2.54857e+06	2.54857e+06	0	0	0	0	rep1	No
4	Cluster16821	Peptide	ESTLGFVDLLR	652.348	1302.68	1274.69	0.94	2	2.31	0	0.95	Delta:H(2)C(2)[+26.01565] (N-term)	2	9	3.23976e+06	9.50938e+07	0	0	0	0	rep1	No
4	Cluster16821	Peptide	ESTLGFVDLLR	777.444	1552.87	1248.67	10	2	4.92	5.49	1		2	118	6.36869e+07	1.05448e+10	0	0	0	0	rep1	No
4	Cluster16821	Peptide	ESTLGFVDLLR	777.444	1552.87	1248.67	2.24	2	2.31	0	0.95	iTRAQ8plex[+304.20536] (N-term)	2	243	1.03944e+07	2460160603	1.10815	7.72858	0.477603	16.9785	rep2	Yes
4	Cluster16821	Peptide	ESTLGFVDLLR	929.547	1857.08	1857.08	2.05	2	2.31	0	0.95	iTRAQ8plex[+304.20536] (N-term); iTRAQ8plex[+304.20536] (T3)	2	10	3.01999e+06	5.82049e+07	1.24147	0.261891	0.52542	14.3569	rep2	Yes
4	Cluster16821	Peptide	ESTLGFVDLLR	512.629	1534.86	1534.87	1.76	3	2.41	0	0.95	iTRAQ8plex[+304.20536] (N-term); Glu->pyro-Glu[-18.010565] (S2)	2	1	9.05669e+06	9.05669e+06	0.0658287	0.0329348	62.7514	2.29273	rep1	Yes
4	Cluster16821	Peptide	ESTLGFVDLLR	512.629	1534.86	1534.86	1.76	3	2.41	0	0.95	iTRAQ8plex[+304.20536] (N-term); Glu->pyro-Glu[-18.010565] (T3)	2	3	1.166e+07	3.26859e+07	0.0603531	0.0261563	59.493	2.7448	rep1	Yes
4	Cluster16821	Peptide	ESTLGFVDLLR	929.546	1857.08	1857.08	1.72	2	2.31	0	0.95	iTRAQ8plex[+304.20536] (N-term); iTRAQ8plex[+304.20536] (S2)	2	10	5.74281e+06	146832719	6.97094	5.27212	76.2269	2.61713	rep1	Yes
4	Cluster16821	Peptide	ESTLGFVDLLR	525.959	1574.85	1574.86	1.71	3	2.41	0	0.95	iTRAQ8plex[+304.20536] (N-term); Cation:Na[+21.981943] (E1)	2	1	2.21017e+07	2.21017e+07	0.0373427	0.149533	0.515376	80.4216	rep2	Yes
4	Cluster16821	Peptide	ESTLGFVDLLR	776.438	1550.86	1550.86	1.29	2	2.31	0	0.95	iTRAQ8plex[+304.20536] (N-term); Ser->Oxoalanine[-2.015650064] (S2)	2	1	2.99524e+07	2.99524e+07	1.5899	0.283022	0.00863335	0.0253037	rep1	Yes
4	Cluster16821	Peptide	ESTLGFVDLLR	784.433	1566.85	1566.85	0.64	2	2.31	0	0.95	iTRAQ8plex[+304.20536] (N-term); Pro->pyro-Glu[+13.979265] (E1)	2	3	6.6557e+06	1.9975e+07	0.0296986	0.205123	0.395906	19.7026	rep1	Yes
4	Cluster16821	Peptide	ESTLGFVDLLRDDYVEK	869.808	2606.4	2302.2	9.5	3	7.25	7.23	1	iTRAQ8plex[+304.20536] (K17)	2	31	5.84897e+07	384385055	0.958897	10.6559	0.20606	3.36466	rep1	Yes
4	Cluster16821	Peptide	ESTLGFVDLLRDDYVEK	728.657	2910.6	2910.61	2.61	4	2.61	0	0.95	iTRAQ8plex[+304.20536] (N-term); iTRAQ8plex[+304.20536] (K17); iTRAQ8plex[+304.20536] (Y14)	2	23	4.53515e+06	9.28495e+07	118.194	0.0731592	41.532	0.219274	rep2	Yes
4	Cluster16821	Peptide	ESTLGFVDLLRDDYVEK	1304.21	2606.4	2606.4	2.3	2	2.31	0	0.95	iTRAQ8plex[+304.20536] (N-term); iTRAQ8plex[+304.20536] (K17)	2	51	1.89173e+06	376174010	96.4145	184.439	35.1765	7.55802	rep1	Yes
4	Cluster16821	Peptide	ESTLGFVDLLRDDYVEKDR	644.338	2573.32	2269.12	10	4	4.37	1.73	1		2	1	7.57391e+06	7.57391e+06	0	0	0	0	rep2	No
4	Cluster16821	Peptide	ESTLGFVDLLRDDYVEKDR	720.389	2877.52	2573.33	9.5	4	6.98	2.69	1	iTRAQ8plex[+304.20536] (K17)	2	47	2.26609e+06	1.70483e+08	0.0111392	0.0393115	75.5619	0.187797	rep1	Yes
4	Cluster16821	Peptide	ESTLGFVDLLRDDYVEKDR	637.351	3181.71	3181.72	3.46	5	2.61	0	0.95	iTRAQ8plex[+304.20536] (N-term); iTRAQ8plex[+304.20536] (K17); iTRAQ8plex[+304.20536] (Y14)	2	4	1.00261e+06	7.31138e+06	1.2328	4.48276	0.291886	0.11938	rep1	Yes
4	Cluster16821	Peptide	ESTLGFVDLLRDDYVEKDR	960.184	2877.53	2573.33	2.33	3	2.41	0	0.95	iTRAQ8plex[+304.20536] (N-term); iTRAQ8plex[+304.20536] (K17)	2	146	6.91623e+06	5.06582e+08	0.98215	0.0582532	0.360553	0.0972308	rep2	Yes
4	Cluster16821	Peptide	EYKLNYYTPEYETK	831.101	2490.28	2186.07	9.5	3	5.57	3.13	0.95	Acetyl[+42.010565] (K3); iTRAQ8plex[+304.20536] (K14)	2	1	1.8793e+07	1.8793e+07	0.922124	2.37874	0.148045	2.65509	rep1	Yes
4	Cluster16821	Peptide	EYKLNYYTPEYETK	831.101	2490.28	2490.28	1.69	3	2.41	0	0.95	iTRAQ8plex[+304.20536] (N-term); iTRAQ8plex[+304.20536] (K3); iTRAQ8plex[+304.20536] (K14)	2	2	1.81918e+07	3.7586e+07	0.922124	2.34226	0.510798	2.65512	rep1	Yes
4	Cluster16821	Peptide	FLFCAEAIYK	614.336	1839.99	1839.99	2.61	3	2.41	0	0.95	iTRAQ8plex[+304.20536] (N-term); iTRAQ8plex[+304.20536] (K10); Methylthio (C4); Glu->pyro-Glu[-18.010565] (E6)	2	3	1.56971e+07	4.71546e+07	1.57742	0.0154369	112.083	4.59034	rep1	Yes
4	Cluster16821	Peptide	FLFCAEAIYK	541.556	2162.19	2162.2	2.59	4	2.61	0	0.95	iTRAQ8plex[+304.20536] (N-term); iTRAQ8plex[+304.20536] (K10); iTRAQ8plex[+304.20536] (Y9); Methylthio (C4)	2	3	895355	2.81431e+06	1.35776	0.210424	2.53371	0.663037	rep2	Yes
4	Cluster16821	Peptide	FLFCAEAIYK	790.911	1579.81	1579.81	2.41	2	2.31	0	0.95	Delta:H(2)C(2)[+26.01565] (N-term); Methylthio (C4); iTRAQ8plex[+304.20536] (K10)	2	5	3.61787e+06	3.5226e+07	1.24044	7.79434	0.591517	0.473635	rep2	Yes
4	Cluster16821	Peptide	FLFCAEAIYK	899.022	1796.03	1796.03	2.23	2	2.31	0	0.95	iTRAQ8plex[+304.20536] (N-term); iTRAQ8plex[+304.20536] (K10); Methylthio (C4)	2	13	1.01132e+07	6.95056e+07	1.12213	9.74328	0.477829	0.223659	rep2	Yes
4	Cluster16821	Peptide	FLFCAEAIYK	943.011	1884.01	1884.01	2.02	2	2.31	0	0.95	Delta:H(2)C(2)[+26.01565] (N-term); Methylthio (C4); iTRAQ8plex[+304.20536] (K10); iTRAQ8plex[+304.20536] (Y9)	2	3	1.45761e+06	4.20938e+06	1.39648	6.08897	0.441074	0.118309	rep1	Yes
4	Cluster16821	Peptide	GGLDFTKDDENVNSQPFMR	825.401	2473.18	2168.98	10	3	4.57	2.37	0.95		2	1	4.84463e+07	4.84463e+07	0	0	0	0	rep1	No
4	Cluster16821	Peptide	GHYLNATAGTCEEMMK	788.056	2361.15	2361.15	2.67	3	2.41	0	0.95	iTRAQ8plex[+304.20536] (N-term); iTRAQ8plex[+304.20536] (K16); Methylthio (C11); Dethiomethyl[-48.003371] (M15)	2	1	1.16056e+07	1.16056e+07	0.010173	0.362023	31.1834	531.77	rep2	Yes
4	Cluster16821	Peptide	GHYLNATAGTCEEMMK	804.052	2409.13	2409.14	2.49	3	2.41	0	0.95	iTRAQ8plex[+304.20536] (N-term); iTRAQ8plex[+304.20536] (K16); Methylthio (C11)	2	4	1.8476e+07	4.94437e+07	1.23628	0.057436	0.622868	8.37758	rep2	Yes
4	Cluster16821	Peptide	GHYLNATAGTCEEMMK	804.379	2410.11	2410.12	2.12	3	2.41	0	0.95	iTRAQ8plex[+304.20536] (N-term); iTRAQ8plex[+304.20536] (K16); Deamidated[+0.984016] (N5); Methylthio (C11)	2	10	8.10709e+06	1.76175e+08	1.23609	0.146494	0.60152	11.6073	rep2	Yes
4	Cluster16821	Peptide	IPPAYTK	466.623	1396.85	1092.65	10	3	2.76	4.31	1	iTRAQ8plex[+304.20536] (K7)	2	24	3.16338e+08	5397488086	1.0801	6.73038	0.457665	0.0212535	rep2	Yes
4	Cluster16821	Peptide	IPPAYTK	699.431	1396.85	1396.85	2.86	2	2.31	0	0.95	iTRAQ8plex[+304.20536] (N-term); iTRAQ8plex[+304.20536] (K7)	2	43	2.02734e+07	3.8525e+08	0.026449	0.216382	140.78	1.485	rep2	Yes
4	Cluster16821	Peptide	IPPAYTKTFQGPPHGIQVER	635.853	2539.38	2235.18	10	4	4.23	1	0.95		2	3	1.10845e+07	48680841	0	0	0	0	rep2	No
4	Cluster16821	Peptide	IPPAYTKTFQGPPHGIQVER	856.799	2567.37	2567.38	1.99	3	2.41	0	0.95	iTRAQ8plex[+304.20536] (N-term); iTRAQ8plex[+304.20536] (K7)	2	2	6.54547e+06	1.1676e+07	1.14061	0.0722935	0.593869	19.4346	rep2	Yes
4	Cluster16821	Peptide	LEDLRIPPAYTK	506.803	2023.18	1718.99	9.5	4	3.65	1.4	0.99	iTRAQ8plex[+304.20536] (K12)	2	2	1.60427e+07	3.20187e+07	1.18607	1.26184	0.225569	2.13535	rep1	Yes
4	Cluster16821	Peptide	LEDLRIPPAYTK	675.402	2023.18	2023.18	1.48	3	2.41	0	0.95	iTRAQ8plex[+304.20536] (N-term); iTRAQ8plex[+304.20536] (K12)	2	1	1.77733e+07	1.77733e+07	1.68598	3.60985	0.130837	2.67476	rep1	Yes
4	Cluster16821	Peptide	LEGDRESTLGFVDLLR	606.979	1817.91	1817.92	1.98	3	2.42	0	0.95	Carbamyl[+43.005814] (N-term)	2	3	3.78715e+06	9.55183e+06	0	0	0	0	rep1	No
4	Cluster16821	Peptide	LEGDRESTLGFVDLLR	615.995	1844.96	1844.97	2.76	3	2.42	0	0.95	Delta:H(2)C(2)[+26.01565] (N-term)	2	5	5.03056e+06	3.50412e+07	0	0	0	0	rep2	No
4	Cluster16821	Peptide	LEGDRESTLGFVDLLR	708.725	2123.15	1818.95	10	3	5.84	6.85	1		2	46	1.90702e+08	2.0844e+09	0	0	0	0	rep1	No
4	Cluster16821	Peptide	LEGDRESTLGFVDLLR	713.395	2137.16	1832.96	10	3	3.84	2.5	0.95	Methyl[+14.01565] (R5)	2	2	2.96639e+07	4.12139e+07	0	0	0	0	rep1	No
4	Cluster16821	Peptide	LEGDRESTLGFVDLLR	923.47	1844.92	1844.93	1.08	2	2.31	0	0.95	Carbamyl[+43.005814] (N-term); Glu->pyro-Glu[-18.010565] (D4); Deamidated[+0.984016] (R5)	2	1	2.22547e+07	2.22547e+07	0	0	0	0	rep1	No
4	Cluster16821	Peptide	LEGDRESTLGFVDLLR	607.845	2427.35	2427.35	3.13	4	2.61	0	0.95	iTRAQ8plex[+304.20536] (N-term); iTRAQ8plex[+304.20536] (S7)	2	9	1.31605e+07	3.59103e+07	1.29074	0.109822	35.7585	0.388666	rep2	Yes
4	Cluster16821	Peptide	LEGDRESTLGFVDLLR	535.297	2137.15	2137.16	2.81	4	2.61	0	0.95	iTRAQ8plex[+304.20536] (N-term); Pro->pyro-Glu[+13.979265] (E2)	2	1	1.155e+07	1.155e+07	42.9834	0.104396	0.63584	285.006	rep2	Yes
4	Cluster16821	Peptide	LEGDRESTLGFVDLLR	910.485	1818.95	1818.96	2.53	2	2.31	0	0.95	iTRAQ8plex[+304.20536] (N-term)	2	67	1.00104e+07	6.39155e+08	0.0229715	0.309072	0.572772	0.625235	rep2	Yes
4	Cluster16821	Peptide	LEGDRESTLGFVDLLRDDYVEK	795.175	3176.67	2872.48	10	4	6.36	2.76	1	iTRAQ8plex[+304.20536] (K22)	2	6	2.14012e+07	2.85286e+07	87.4225	0.0672932	0.29961	0.250353	rep2	Yes
4	Cluster16821	Peptide	LEGDRESTLGFVDLLRDDYVEK	795.178	3176.68	3176.68	2.27	4	2.61	0	0.95	iTRAQ8plex[+304.20536] (N-term); iTRAQ8plex[+304.20536] (K22)	2	1	1.1113e+06	1.1113e+06	48.2658	3.62901	0.0162712	0.100159	rep2	Yes
4	Cluster16821	Peptide	LEGDRESTLGFVDLLRDDYVEKDR	862.958	3447.8	3447.81	2.78	4	2.61	0	0.95	iTRAQ8plex[+304.20536] (N-term); iTRAQ8plex[+304.20536] (K22)	2	1	796891	796891	1.05909	4.41658	0.230541	3.14498	rep1	Yes
4	Cluster16821	Peptide	LGLSAKNYGR	461.607	1381.79	1077.59	10	3	3.24	2.98	0.95		2	2	3.18578e+07	4.00115e+07	0	0	0	0	rep2	No
4	Cluster16821	Peptide	LNYYTPEYETK	1015.04	2028.06	1723.86	9.5	2	5.13	5.52	1	iTRAQ8plex[+304.20536] (K11)	2	62	8.71717e+06	3301560272	0.823239	1.47421	0.329299	4.23032	rep1	Yes
4	Cluster16821	Peptide	LNYYTPEYETK	1022.04	2042.07	2042.08	2.94	2	2.31	0	0.95	iTRAQ8plex[+304.20536] (N-term); iTRAQ8plex[+304.20536] (K11); Pro->pyro-Glu[+13.979265] (E7)	2	2	3.37809e+06	9.90256e+06	401.947	0.0280958	0.543566	4.45131	rep2	Yes
4	Cluster16821	Peptide	LNYYTPEYETK	1015.04	2028.06	1723.86	2.32	2	2.31	0	0.95	iTRAQ8plex[+304.20536] (N-term); iTRAQ8plex[+304.20536] (K11)	2	84	3.96404e+06	6.7664e+08	1.1208	0.0878222	23.9082	6.07018	rep2	Yes
4	Cluster16821	Peptide	LNYYTPEYETK	778.759	2333.25	2333.25	2.31	3	2.41	0	0.95	iTRAQ8plex[+304.20536] (N-term); iTRAQ8plex[+304.20536] (K11); iTRAQ8plex[+304.20536] (Y4); Deamidated[+0.984016] (N2)	2	2	1.88748e+07	1.98908e+07	1.00919	0.110417	0.53387	0.021745	rep2	Yes
4	Cluster16821	Peptide	LNYYTPEYETK	684.355	2050.04	2050.05	2.2	3	2.41	0	0.95	iTRAQ8plex[+304.20536] (N-term); iTRAQ8plex[+304.20536] (K11); Cation:Na[+21.981943] (E7)	2	1	1.77549e+07	1.77549e+07	1.1806	1.23444	0.194159	0.923293	rep1	Yes
4	Cluster16821	Peptide	LNYYTPEYETK	1015.53	2029.05	2029.05	1.97	2	2.31	0	0.95	iTRAQ8plex[+304.20536] (N-term); iTRAQ8plex[+304.20536] (K11); Deamidated[+0.984016] (N2)	2	12	1.01335e+07	1.25319e+08	1.25971	0.139954	0.55805	0.0340627	rep2	Yes
4	Cluster16821	Peptide	LNYYTPEYETK	1014.52	2027.03	2027.03	1.97	2	2.31	0	0.95	iTRAQ8plex[+304.20536] (N-term); iTRAQ8plex[+304.20536] (K11); Deamidated[+0.984016] (N2); Ser->Oxoalanine[-2.015650064] (Y4)	2	1	945685	945685	1.47502	0.0912659	0.315438	2.32234	rep1	Yes
4	Cluster16821	Peptide	LNYYTPEYETK	778.428	2332.26	2332.26	1.8	3	2.41	0	0.95	iTRAQ8plex[+304.20536] (N-term); iTRAQ8plex[+304.20536] (K11); iTRAQ8plex[+304.20536] (T5)	2	20	1.7943e+07	1.61337e+08	2.48729	2.74285	0.286829	0.719084	rep1	Yes
4	Cluster16821	Peptide	LNYYTPEYETK	1167.14	2332.26	2332.27	1.72	2	2.31	0	0.95	iTRAQ8plex[+304.20536] (N-term); iTRAQ8plex[+304.20536] (K11); iTRAQ8plex[+304.20536] (Y8)	2	6	1.99155e+06	2.30289e+07	0.0110608	572.864	0.32842	509.604	rep1	Yes
4	Cluster16821	Peptide	LNYYTPEYETK	1167.14	2332.26	2332.27	1.72	2	2.31	0	0.95	iTRAQ8plex[+304.20536] (N-term); iTRAQ8plex[+304.20536] (K11); iTRAQ8plex[+304.20536] (Y4)	2	20	3.79214e+06	1.27771e+08	3.06711	1.72099	78.183	2.17641	rep1	Yes
4	Cluster16821	Peptide	LNYYTPEYETK	1167.63	2333.25	2333.25	1.71	2	2.31	0	0.95	iTRAQ8plex[+304.20536] (N-term); iTRAQ8plex[+304.20536] (K11); iTRAQ8plex[+304.20536] (Y3); Deamidated[+0.984016] (N2)	2	1	2.56917e+06	2.56917e+06	2.26054	5.66694	67.2788	2.77628	rep1	Yes
4	Cluster16821	Peptide	LNYYTPEYETK	876.436	1750.86	1750.85	1.37	2	2.31	0	0.95	Delta:H(2)C(2)[+26.01565] (N-term); Deamidated[+0.984016] (N2); iTRAQ8plex[+304.20536] (K11)	2	6	5.20421e+06	2.24013e+07	62.3692	0.118692	25.1018	225.543	rep2	Yes
4	Cluster16821	Peptide	LNYYTPEYETK	873.929	1745.84	1745.84	1.37	2	2.31	0	0.95	iTRAQ8plex[+304.20536] (N-term); iTRAQ8plex[+304.20536] (K11); Cation:Na[+21.981943] (E9)	2	2	5.79902e+06	1.30923e+07	0.983914	1.27338	83.1665	125.425	rep2	Yes
4	Cluster16821	Peptide	LNYYTPEYETK	854.425	1706.83	1706.83	0	2	2.31	0	0.95	iTRAQ8plex[+304.20536] (N-term); iTRAQ8plex[+304.20536] (K11); Gln->pyro-Glu[-17.026549] (N2)	2	1	8024125	8024125	1.63646	2.90015	25.6976	1.08874	rep1	Yes
4	Cluster16821	Peptide	LSGGDHVHAGTVVGK	681.39	2041.15	1736.95	10	3	4.69	7.11	1	iTRAQ8plex[+304.20536] (K15)	2	6	5.83427e+07	6.67705e+08	110.097	0.214456	0.443333	1.6379	rep2	Yes
4	Cluster16821	Peptide	LSGGDHVHAGTVVGK	1173.68	2345.35	2345.36	2.56	2	2.31	0	0.95	iTRAQ8plex[+304.20536] (N-term); iTRAQ8plex[+304.20536] (K15); iTRAQ8plex[+304.20536] (S2)	2	2	1.10135e+06	7.41752e+06	1.00463	5.34248	0.0130459	3.7052	rep1	Yes
4	Cluster16821	Peptide	LSGGDHVHAGTVVGK	1021.58	2041.15	2055.13	1.95	2	2.31	0	0.95	iTRAQ8plex[+304.20536] (N-term); iTRAQ8plex[+304.20536] (K15)	2	5	820352	7.24433e+07	0.968386	27.8757	0.022368	115.971	rep2	Yes
4	Cluster16821	Peptide	LSGGDHVHAGTVVGK	1035.56	2069.11	2069.11	1.93	2	2.31	0	0.95	iTRAQ8plex[+304.20536] (N-term); iTRAQ8plex[+304.20536] (K15); Formyl[+27.994915] (H8)	2	1	1.89282e+06	1.89282e+06	117.418	23.4158	45.0324	128.543	rep1	Yes
4	Cluster16821	Peptide	NHGMHFR	406.874	1217.6	913.398	10	3	2.42	2.4	0.95	Oxidation[+15.994915] (M4)	2	1	3.10953e+06	3.10953e+06	0	0	0	0	rep2	No
4	Cluster16821	Peptide	TFQGPPHGIQVER	590.657	1768.95	1464.75	10	3	6.18	8.17	1		2	181	6200200	9.90754e+09	0	0	0	0	rep1	No
4	Cluster16821	Peptide	TFQGPPHGIQVER	746.37	1490.72	1563.78	2.56	2	2.31	0	0.95	Acetyl[+42.010565] (N-term)	2	2	5.39598e+06	2.80108e+07	0	0	0	0	rep2	No
4	Cluster16821	Peptide	TFQGPPHGIQVER	746.387	1490.76	1490.76	1.61	2	2.31	0	0.95	Delta:H(2)C(2)[+26.01565] (N-term)	2	4	2.4913e+07	6.28759e+07	0	0	0	0	rep1	No
4	Cluster16821	Peptide	TFQGPPHGIQVER	747.377	1492.74	1492.74	3.08	2	2.31	0	0.95	Formyl[+27.994915] (N-term)	2	1	4.99478e+06	4.99478e+06	0	0	0	0	rep2	No
4	Cluster16821	Peptide	VALEACVQAR	566.286	1130.56	1130.56	1.95	2	2.31	0	0.95	Delta:H(2)C(2)[+26.01565] (N-term); Methylthio (C6)	2	6	8.63295e+06	2.17625e+07	0	0	0	0	rep2	No
4	Cluster16821	Peptide	VLAKALR	358.913	1073.72	769.517	10	3	2.6	3.22	0.95		2	3	1.74617e+07	3.6292e+07	0	0	0	0	rep1	No
4	Cluster16821	Peptide	VTPQPGVPPEEAGAAVAAESSTGTWTTVWTDGLTSLDR	1387.03	4158.07	3853.86	10	3	5.6	6.9	1		2	53	1.13755e+07	3.16417e+08	0	0	0	0	rep2	No
4	Cluster16821	Peptide	VTPQPGVPPEEAGAAVAAESSTGTWTTVWTDGLTSLDR	954.102	4765.47	4462.27	3.14	5	2.61	0	0.95	iTRAQ8plex[+304.20536] (N-term); iTRAQ8plex[+304.20536] (S35)	2	1	1.38533e+06	1.38533e+06	1.23342	6.92125	0.539283	6.01454	rep2	Yes
4	Cluster16821	Peptide	VTPQPGVPPEEAGAAVAAESSTGTWTTVWTDGLTSLDR	1116.58	4462.28	4462.28	1.79	4	2.61	0	0.95	iTRAQ8plex[+304.20536] (N-term); iTRAQ8plex[+304.20536] (S21)	2	41	7.61419e+06	1.91922e+08	1.36581	5.02281	0.375881	2.961	rep1	Yes
4	Cluster16821	Peptide	VTPQPGVPPEEAGAAVAAESSTGTWTTVWTDGLTSLDR	1036.02	4140.05	4140.05	0.97	4	2.61	0	0.95	iTRAQ8plex[+304.20536] (N-term); Glu->pyro-Glu[-18.010565] (D31)	2	1	345314	345314	0.506702	4.27917	0.331697	1.07689	rep2	Yes
4	Cluster16821	Peptide	VTPQPGVPPEEAGAAVAAESSTGTWTTVWTDGLTSLDR	1035.77	4139.05	4139.06	0.97	4	2.61	0	0.95	iTRAQ8plex[+304.20536] (N-term); Glu->pyro-Glu[-18.010565] (T30)	2	3	1.65714e+07	2.93639e+07	0.0422523	0.612452	0.587051	10.4191	rep2	Yes
4	Cluster16821	Peptide	VTPQPGVPPEEAGAAVAAESSTGTWTTVWTDGLTSLDR	1111.07	4440.24	4440.24	0.9	4	2.61	0	0.95	iTRAQ8plex[+304.20536] (N-term); iTRAQ8plex[+304.20536] (S21); Deamidated[+0.984016] (Q4)	2	1	474786	474786	3.85851	15.4232	1.40811	11.7512	rep2	Yes
4	Cluster16821	Peptide	VTPQPGVPPEEAGAAVAAESSTGTWTTVWTDGLTSLDR	1387.03	4158.07	4150.01	0.72	3	2.41	0	0.95	iTRAQ8plex[+304.20536] (N-term)	2	357	942766	1525629302	2.12454	7.46048	0.379264	7.50575	rep2	Yes
4	Cluster16821	Peptide	VTPQPGVPPEEAGAAVAAESSTGTWTTVWTDGLTSLDR	841.619	4203.06	4203.06	0.59	5	2.61	0	0.95	iTRAQ8plex[+304.20536] (N-term); Nitro[+44.985078] (W25)	2	1	3.0482e+06	3.0482e+06	1.43781	0.933336	0.417412	3.15374	rep1	Yes
4	Cluster16821	Peptide	VTPQPGVPPEEAGAAVAAESSTGTWTTVWTDGLTSLDR	1060.78	4239.08	4239.08	0	4	2.61	0	0.95	iTRAQ8plex[+304.20536] (N-term); FormaldehydeAdduct[+12.0] (W29)	2	1	8.87494e+06	8.87494e+06	1.06014	0.563862	11.2879	93.8683	rep1	Yes
4	Cluster16821	Peptide	VTPQPGVPPEEAGAAVAAESSTGTWTTVWTDGLTSLDRYKGR	1564.47	4690.39	4690.39	0.64	3	2.42	0	0.95	iTRAQ8plex[+304.20536] (N-term); iTRAQ8plex[+304.20536] (K40)	2	1	140483	140483	11163.1	11163.1	11163.1	11163.1	rep2	No
5	Cluster30171	Peptide	ADSVSK	607.861	1213.71	909.507	9.5	2	2.73	3.85	0.95	iTRAQ8plex[+304.20536] (K6)	2	3	1096286128	1249038860	1.71925	6.35875	0.0776405	0.00979273	rep1	Yes
5	Cluster30171	Peptide	ADSVSK	607.858	1213.7	1213.7	3.13	2	2.31	0	0.95	iTRAQ8plex[+304.20536] (N-term); iTRAQ8plex[+304.20536] (K6)	2	1	7.99043e+06	7.99043e+06	1.15362	6.77471	18.7559	0.570673	rep2	Yes
5	Cluster30171	Peptide	EEDGIDYAAVTVQLPGGER	1162.09	2322.16	2017.96	10	2	6.58	6.93	1		2	11	2.53156e+07	3.7103e+08	0	0	0	0	rep2	No
5	Cluster30171	Peptide	FKEEDGIDYAAVTVQLPGGER	1161.59	2321.17	2321.15	7.03	2	3.87	3.76	0.95	Dimethyl[+28.0313] (K2)	2	1	3.18815e+06	3.18815e+06	0	0	0	0	rep2	No
5	Cluster30171	Peptide	FKEEDGIDYAAVTVQLPGGER	968.183	2901.53	2597.33	10	3	6.3	7.74	1	iTRAQ8plex[+304.20536] (K2)	2	70	9.49705e+06	7.42148e+08	1.0567	0.208671	24.4415	0.0466591	rep2	Yes
5	Cluster30171	Peptide	FKEEDGIDYAAVTVQLPGGER	1069.58	3205.73	3205.74	2.81	3	2.41	0	0.95	iTRAQ8plex[+304.20536] (N-term); iTRAQ8plex[+304.20536] (K2); iTRAQ8plex[+304.20536] (Y9)	2	13	1.55997e+06	5.75358e+07	0.870013	0.220191	0.627923	5.15722	rep2	Yes
5	Cluster30171	Peptide	FKEEDGIDYAAVTVQLPGGER	962.18	2883.52	2883.52	2.29	3	2.41	0	0.95	iTRAQ8plex[+304.20536] (N-term); iTRAQ8plex[+304.20536] (K2); Glu->pyro-Glu[-18.010565] (D8)	2	1	8.09288e+06	8.09288e+06	1.13112	0.127672	0.642325	5.13716	rep2	Yes
5	Cluster30171	Peptide	FKEEDGIDYAAVTVQLPGGER	1451.77	2901.53	2901.53	2.07	2	2.31	0	0.95	iTRAQ8plex[+304.20536] (N-term); iTRAQ8plex[+304.20536] (K2)	2	91	4.54319e+06	6.62851e+08	0.0163312	4.70302	0.340168	0.0589504	rep1	Yes
5	Cluster30171	Peptide	FLVPSYR	593.351	1184.69	880.481	10	2	2.71	2.27	0.95		2	17	1.22064e+07	4.98913e+09	0	0	0	0	rep2	No
5	Cluster30171	Peptide	GGSTGYDNAVALPAGGR	795.381	1588.75	1588.75	0.63	2	2.31	0	0.95	Delta:H(2)C(2)[+26.01565] (N-term); Deamidated[+0.984016] (N8)	2	4	1.23107e+07	2.88859e+07	0	0	0	0	rep1	No
5	Cluster30171	Peptide	GGSTGYDNAVALPAGGR	933.982	1865.95	1561.75	10	2	7.01	7.19	1		2	61	1.85803e+07	5.16012e+09	0	0	0	0	rep2	No
5	Cluster30171	Peptide	GGSTGYDNAVALPAGGR	996.997	1991.98	1687.78	10	2	4.58	3.95	0.95	Acetyl[+42.010565] (T4); Acetyl[+42.010565] (S3); Acetyl[+42.010565] (Y6)	2	2	2.9565e+06	2.68067e+07	0	0	0	0	rep2	No
5	Cluster30171	Peptide	GRGGSTGYDNAVALPAGGR	841.405	1680.8	1680.8	0	2	2.31	0	0.95	iTRAQ8plex[+304.20536] (N-term); Tyr->Dha[-94.041865] (Y8)	2	1	3.70032e+06	3.70032e+06	0	0	0	0	rep1	No
5	Cluster30171	Peptide	GRGGSTGYDNAVALPAGGR	966.46	1930.9	1930.9	0	2	2.31	0	0.95		2	1	7.56225e+06	7.56225e+06	0	0	0	0	rep1	No
5	Cluster30171	Peptide	GSSFLDPKGR	456.59	1366.75	1062.55	10	3	3.33	4.17	1		2	2	4.06986e+07	7.47998e+07	0	0	0	0	rep1	No
5	Cluster30171	Peptide	GSSFLDPKGR	470.597	1408.77	1104.56	10	3	3.05	3.41	0.95	Acetyl[+42.010565] (K8)	2	1	6.24637e+07	6.24637e+07	0	0	0	0	rep1	No
5	Cluster30171	Peptide	IATSSPSRNVHLRSNQTVGK	1151.59	2301.16	2301.16	2.28	2	3.29	1.79	0.95	Phospho[+79.966331] (S7); Dimethyl[+28.0313] (R8); Acetyl[+42.010565] (S14)	2	1	2.17107e+06	2.17107e+06	0	0	0	0	rep2	No
5	Cluster30171	Peptide	IQGVWYGQLE	748.904	1495.79	1191.59	10	2	3.38	4.15	0.95		2	17	3.42879e+07	2.09271e+08	0	0	0	0	rep1	No
5	Cluster30171	Peptide	ITKSKPETGEVIGVFESLQPSDTDLGAK	830.856	4149.24	4149.25	2.05	5	2.61	0	0.95	iTRAQ8plex[+304.20536] (N-term); iTRAQ8plex[+304.20536] (K3); iTRAQ8plex[+304.20536] (K5); iTRAQ8plex[+304.20536] (K28)	2	1	9.97161e+06	9.97161e+06	0.196501	4.87259	5.15702	7.99867	rep1	Yes
5	Cluster30171	Peptide	KFCFEPTSFTVK	777.453	2329.34	2391.31	2.63	3	2.41	0	0.95	iTRAQ8plex[+304.20536] (N-term); iTRAQ8plex[+304.20536] (K1); iTRAQ8plex[+304.20536] (K12); Methylthio (C3)	2	28	1.25804e+07	2.15484e+08	62.1972	0.190436	67.1673	0.117104	rep2	Yes
5	Cluster30171	Peptide	LTYDEIQSK	625.815	1249.61	1249.61	5.59	2	3.1	2.42	0.95	Acetyl[+42.010565] (T2); Acetyl[+42.010565] (S8); Acetyl[+42.010565] (Y3); Dimethyl[+28.0313] (K9)	2	1	1.06255e+07	1.06255e+07	0	0	0	0	rep1	No
5	Cluster30171	Peptide	LTYTLDEIEGPFEVSSDGSVK	965.508	2893.51	2589.3	10	3	5.26	6.22	1	iTRAQ8plex[+304.20536] (K21)	2	42	3.37171e+07	6.63691e+08	0.0229349	0.0602647	0.601928	0.450886	rep2	Yes
5	Cluster30171	Peptide	LTYTLDEIEGPFEVSSDGSVK	1066.91	3197.72	3197.71	1.88	3	2.41	0	0.95	iTRAQ8plex[+304.20536] (N-term); iTRAQ8plex[+304.20536] (K21); iTRAQ8plex[+304.20536] (Y3)	2	1	8.86417e+06	8.86417e+06	343.863	4.2449	0.573588	12.7455	rep1	Yes
5	Cluster30171	Peptide	LTYTLDEIEGPFEVSSDGSVK	1066.91	3197.7	3197.71	1.88	3	2.41	0	0.95	iTRAQ8plex[+304.20536] (N-term); iTRAQ8plex[+304.20536] (K21); iTRAQ8plex[+304.20536] (S16)	2	12	3.85064e+06	6.22558e+07	0.0131716	1.11874	19.8832	4.63644	rep1	Yes
5	Cluster30171	Peptide	LTYTLDEIEGPFEVSSDGSVK	800.429	3197.69	3197.69	1.63	4	2.61	0	0.95	iTRAQ8plex[+304.20536] (N-term); iTRAQ8plex[+304.20536] (K21); iTRAQ8plex[+304.20536] (S15)	2	5	2.96186e+06	9.03329e+06	1.65114	0.0566465	24.0668	0.141515	rep1	Yes
5	Cluster30171	Peptide	LTYTLDEIEGPFEVSSDGSVK	959.168	2874.48	2874.48	1.25	3	2.41	0	0.95	iTRAQ8plex[+304.20536] (N-term); iTRAQ8plex[+304.20536] (K21); Glu->pyro-Glu[-18.010565] (T4)	2	1	1.83165e+07	1.83165e+07	0.0147156	0.0721009	0.643808	0.257174	rep2	Yes
5	Cluster30171	Peptide	LTYTLDEIEGPFEVSSDGSVK	965.506	2893.49	2589.3	1.16	3	2.41	0	0.95	iTRAQ8plex[+304.20536] (N-term); iTRAQ8plex[+304.20536] (K21)	2	119	8.68177e+06	8.69819e+08	0.0131909	5.83814	0.0602486	0.0238245	rep1	Yes
5	Cluster30171	Peptide	LTYTLDEIEGPFEVSSDGSVK	959.508	2875.5	2875.49	1.15	3	2.41	0	0.95	iTRAQ8plex[+304.20536] (N-term); iTRAQ8plex[+304.20536] (K21); Glu->pyro-Glu[-18.010565] (S19)	2	2	3.28879e+07	5.51277e+07	1.40934	5.28336	0.209085	2.57633	rep1	Yes
5	Cluster30171	Peptide	NAPPDFQNTKLMTR	646.344	1936.01	1631.81	10	3	4.25	3.64	0.96		2	1	1.45303e+07	1.45303e+07	0	0	0	0	rep2	No
5	Cluster30171	Peptide	NTAASVGEITLK	775.446	1548.88	1244.66	10	2	4.65	3.27	0.95	Acetyl[+42.010565] (K12)	2	1	1.4606e+07	1.4606e+07	0	0	0	0	rep1	No
5	Cluster30171	Peptide	QLEASGKPDNFSGK	696.049	2085.13	1780.93	10	3	3.73	3.12	0.95	iTRAQ8plex[+304.20536] (K14)	2	1	4.00209e+07	4.00209e+07	0.990689	0.212397	0.599841	0.08278	rep2	Yes
5	Cluster30171	Peptide	QLEASGKPDNFSGK	1195.67	2389.33	2085.13	9.5	2	4.08	4.76	0.95	iTRAQ8plex[+304.20536] (K7); iTRAQ8plex[+304.20536] (K14)	2	4	2.91601e+06	9.04944e+07	2.92431	4.05432	83.4495	428.987	rep1	Yes
5	Cluster30171	Peptide	QLEASGKPDNFSGK	793.106	2376.29	2376.3	2.52	3	2.41	0	0.95	iTRAQ8plex[+304.20536] (N-term); iTRAQ8plex[+304.20536] (K7); iTRAQ8plex[+304.20536] (K14); Deamidated[+0.984016] (N10)	2	1	2.48252e+07	2.48252e+07	0.981402	0.145793	0.661451	6.45908	rep2	Yes
5	Cluster30171	Peptide	QLEASGKPDNFSGK	791.774	2372.3	2372.3	2.15	3	2.41	0	0.95	Gln->pyro-Glu[-17.026549] (N-term); iTRAQ8plex[+304.20536] (K7); iTRAQ8plex[+304.20536] (K14); iTRAQ8plex[+304.20536] (S12)	2	1	1.55055e+07	1.55055e+07	1.1081	0.231621	0.606359	5.18545	rep2	Yes
5	Cluster30171	Peptide	QLEASGKPDNFSGK	1028.05	2054.09	2068.09	1.93	2	2.31	0	0.95	Gln->pyro-Glu[-17.026549] (N-term); iTRAQ8plex[+304.20536] (K7); iTRAQ8plex[+304.20536] (K14)	2	3	3.15073e+06	5.34449e+07	1.01047	0.0998864	0.64432	0.0347378	rep2	Yes
5	Cluster30171	Peptide	QLEASGKPDNFSGK	1195.67	2389.33	2185.15	1.83	2	2.31	0	0.95	iTRAQ8plex[+304.20536] (N-term); iTRAQ8plex[+304.20536] (K7); iTRAQ8plex[+304.20536] (K14)	2	14	2.916e+06	139356988	2.92435	4.05433	83.4489	428.985	rep1	Yes
5	Cluster30171	Peptide	QLEASGKPDNFSGK	1028.54	2055.07	2055.07	0.97	2	2.31	0	0.95	Gln->pyro-Glu[-17.026549] (N-term); iTRAQ8plex[+304.20536] (K7); iTRAQ8plex[+304.20536] (K14); Deamidated[+0.984016] (N10)	2	3	1.10133e+07	5.06973e+07	1.39658	6.09704	0.815584	2.37528	rep1	Yes
5	Cluster30171	Peptide	RLTYDEIQSK	533.63	1597.87	1293.66	10	3	4.75	3.24	0.95	Acetyl[+42.010565] (S9)	2	2	6.70909e+07	1.30989e+08	0	0	0	0	rep2	No
5	Cluster30171	Peptide	RLTYDEIQSK	799.94	1597.86	1293.66	10	2	3.69	3.24	0.95	Acetyl[+42.010565] (K10)	2	1	7.84211e+06	7.84211e+06	0	0	0	0	rep2	No
5	Cluster30171	Peptide	VPFLFTVK	627.89	1253.77	949.564	10	2	2.77	3.66	0.95		2	3	4.30669e+07	8.98467e+07	0	0	0	0	rep1	No
6	Cluster18962	Peptide	AESVSK	614.869	1227.72	923.523	9.5	2	3.03	3.38	0.95	iTRAQ8plex[+304.20536] (K6)	2	12	2.21906e+07	3292502237	1.45362	4.6708	0.0580862	1.43725	rep1	Yes
6	Cluster18962	Peptide	AESVSK	766.969	1531.92	1531.93	3.79	2	2.31	0	0.95	iTRAQ8plex[+304.20536] (N-term); iTRAQ8plex[+304.20536] (K6); iTRAQ8plex[+304.20536] (S5)	2	1	5.35552e+06	5.35552e+06	2.34009	5.93886	32.812	557.552	rep2	Yes
6	Cluster18962	Peptide	AESVSK	614.868	1227.72	1227.72	2.77	2	2.31	0	0.95	iTRAQ8plex[+304.20536] (N-term); iTRAQ8plex[+304.20536] (K6)	2	91	2.63033e+06	8.07701e+08	87.8121	0.0719467	0.654965	0.112081	rep2	Yes
6	Cluster18962	Peptide	EEDGIDYAAVTVQLPGGER	1162.09	2322.16	2017.96	10	2	6.58	6.93	1		2	11	2.53156e+07	3.7103e+08	0	0	0	0	rep2	No
6	Cluster18962	Peptide	EEDGIDYAAVTVQLPGGER	876.46	2626.36	2626.37	2.06	3	2.41	0	0.95	iTRAQ8plex[+304.20536] (N-term); iTRAQ8plex[+304.20536] (Y7)	2	2	1.83817e+07	2.68157e+07	4.58772	2.14743	0.182464	2.2716	rep1	Yes
6	Cluster18962	Peptide	EEDGIDYAAVTVQLPGGER	1162.09	2322.16	2017.96	0.99	2	2.31	0	0.95	iTRAQ8plex[+304.20536] (N-term)	2	20	2.34192e+07	2.04837e+08	1.70868	0.0495304	0.143285	2.77577	rep1	Yes
6	Cluster18962	Peptide	EEDGIDYAAVTVQLPGGER	1153.08	2304.15	2304.15	0.87	2	2.31	0	0.95	iTRAQ8plex[+304.20536] (N-term); Glu->pyro-Glu[-18.010565] (D3)	2	1	6.06234e+06	6.06234e+06	0.00993949	18.456	69.7552	9.75989	rep1	Yes
6	Cluster18962	Peptide	ENVKNTAASVGEITLK	863.171	2586.49	2586.49	1.97	3	2.41	0	0.95	iTRAQ8plex[+304.20536] (N-term); iTRAQ8plex[+304.20536] (K4); iTRAQ8plex[+304.20536] (K16); Deamidated[+0.984016] (N5)	2	1	1.16965e+07	1.16965e+07	0.942946	0.19069	27.8486	0.0258712	rep2	Yes
6	Cluster18962	Peptide	FCFEPTSFTVK	1132.61	2263.2	2263.21	2.65	2	2.31	0	0.95	iTRAQ8plex[+304.20536] (N-term); iTRAQ8plex[+304.20536] (K11); iTRAQ8plex[+304.20536] (S7); Methylthio (C2)	2	1	818081	818081	1.27578	5.7097	0.632127	5.17933	rep2	Yes
6	Cluster18962	Peptide	FCFEPTSFTVK	755.411	2263.21	2263.21	2.52	3	2.41	0	0.95	iTRAQ8plex[+304.20536] (N-term); iTRAQ8plex[+304.20536] (K11); iTRAQ8plex[+304.20536] (T6); Methylthio (C2)	2	1	1.04085e+07	1.04085e+07	1.35557	0.0937241	62.1777	0.218913	rep2	Yes
6	Cluster18962	Peptide	FCFEPTSFTVK	987.52	1973.03	1973.03	2.23	2	2.31	0	0.95	iTRAQ8plex[+304.20536] (N-term); iTRAQ8plex[+304.20536] (K11); Methylthio (C2); Pro->pyro-Glu[+13.979265] (E4)	2	1	4.25275e+06	4.25275e+06	0.226587	0.0310818	22.392	29.8633	rep1	Yes
6	Cluster18962	Peptide	FCFEPTSFTVK	841.415	1680.81	1680.82	1.19	2	2.31	0	0.95	Delta:H(2)C(2)[+26.01565] (N-term); Methylthio (C2); iTRAQ8plex[+304.20536] (K11)	2	2	8.23301e+06	1.76792e+07	1.76607	5.52881	70.0391	59.8256	rep1	Yes
6	Cluster18962	Peptide	FLVPSYR	593.351	1184.69	880.481	10	2	2.71	2.27	0.95		2	17	1.22064e+07	4.98913e+09	0	0	0	0	rep2	No
6	Cluster18962	Peptide	FLVPSYR	395.901	1184.68	1184.68	4.05	3	2.41	0	0.95	iTRAQ8plex[+304.20536] (N-term)	2	188	8.47266e+06	2190232514	0.883699	0.208016	0.609371	0.0356387	rep2	Yes
6	Cluster18962	Peptide	FLVPSYR	745.452	1488.89	1488.89	2.69	2	2.31	0	0.95	iTRAQ8plex[+304.20536] (N-term); iTRAQ8plex[+304.20536] (Y6)	2	11	5.24883e+06	6.09619e+07	0.758506	8.11392	40.7375	1.35071	rep2	Yes
6	Cluster18962	Peptide	GDEEELSK	757.91	1513.8	1209.6	10	2	3.44	3.84	0.95	iTRAQ8plex[+304.20536] (K8)	2	23	24431774	2647675705	1.33008	0.0731182	58.5568	435.571	rep2	Yes
6	Cluster18962	Peptide	GDEEELSK	768.902	1535.79	1535.79	2.47	2	2.31	0	0.95	iTRAQ8plex[+304.20536] (N-term); iTRAQ8plex[+304.20536] (K8); Cation:Na[+21.981943] (E5)	2	1	9.713e+06	9.713e+06	97.0931	20.3977	0.626295	2.22615	rep2	Yes
6	Cluster18962	Peptide	GDEEELSK	757.908	1513.8	1209.6	2.15	2	2.31	0	0.95	iTRAQ8plex[+304.20536] (N-term); iTRAQ8plex[+304.20536] (K8)	2	37	2.40098e+07	3.63169e+08	1.2043	0.269151	0.589672	1.7986	rep2	Yes
6	Cluster18962	Peptide	GDEEELSK	910.011	1818.01	1818	1.98	2	2.31	0	0.95	iTRAQ8plex[+304.20536] (N-term); iTRAQ8plex[+304.20536] (K8); iTRAQ8plex[+304.20536] (S7)	2	2	4.46925e+06	1.38227e+07	277.668	13.1178	0.348698	463.744	rep1	Yes
6	Cluster18962	Peptide	GDEEELSK	763.909	1525.8	1525.8	1.84	2	2.31	0	0.95	iTRAQ8plex[+304.20536] (N-term); iTRAQ8plex[+304.20536] (K8); Glu->pyro-Glu[-18.010565] (D2)	2	1	1.04798e+07	1.04798e+07	0.013516	6.91691	0.589512	334.787	rep2	Yes
6	Cluster18962	Peptide	GDEEELSKENVK	763.758	2288.24	1984.06	10	3	3.98	4.54	1	iTRAQ8plex[+304.20536] (K8); iTRAQ8plex[+304.20536] (K12)	2	29	2.17747e+07	5.704e+08	0.00938346	0.154122	0.699384	2.70865	rep2	Yes
6	Cluster18962	Peptide	GDEEELSKENVK	662.355	1984.04	1679.85	9.5	3	4.11	4.64	1	iTRAQ8plex[+304.20536] (K12)	2	1	9.95355e+06	9.95355e+06	1.83552	1.52819	0.075716	3.12054	rep1	Yes
6	Cluster18962	Peptide	GDEEELSKENVK	676.364	2026.07	1721.86	9.5	3	4.32	3.74	0.97	Acetyl[+42.010565] (K8); iTRAQ8plex[+304.20536] (K12)	2	2	3.61104e+07	3.80888e+07	1.43045	3.59192	1.02488	2.7046	rep1	Yes
6	Cluster18962	Peptide	GDEEELSKENVK	757.753	2270.24	2270.24	2.25	3	2.41	0	0.95	iTRAQ8plex[+304.20536] (N-term); iTRAQ8plex[+304.20536] (K8); iTRAQ8plex[+304.20536] (K12); Glu->pyro-Glu[-18.010565] (S7)	2	1	7.7033e+06	7.7033e+06	0.0182472	0.0945773	36.7573	0.957952	rep2	Yes
6	Cluster18962	Peptide	GDEEELSKENVK	763.758	2288.25	2288.25	2.23	3	2.41	0	0.95	iTRAQ8plex[+304.20536] (N-term); iTRAQ8plex[+304.20536] (K8); iTRAQ8plex[+304.20536] (K12)	2	33	2.17747e+07	213889412	0.00938344	0.154122	0.699384	2.70864	rep2	Yes
6	Cluster18962	Peptide	GDEEELSKENVK	757.754	2270.24	2270.24	1.59	3	2.41	0	0.95	iTRAQ8plex[+304.20536] (N-term); iTRAQ8plex[+304.20536] (K8); iTRAQ8plex[+304.20536] (K12); Glu->pyro-Glu[-18.010565] (E5)	2	1	1.58831e+07	1.58831e+07	2.07426	1.87568	0.272426	2.33305	rep1	Yes
6	Cluster18962	Peptide	GDEEELSKENVKNTAASVGEITLK	945.279	3777.07	3472.9	10	4	5.44	3.26	1	iTRAQ8plex[+304.20536] (K8); iTRAQ8plex[+304.20536] (K12); iTRAQ8plex[+304.20536] (K24)	2	1	2.50681e+07	2.50681e+07	0.886528	0.0793864	0.726291	4.56663	rep2	Yes
6	Cluster18962	Peptide	GDEEELSKENVKNTAASVGEITLK	945.279	3777.09	3777.07	2.12	4	2.61	0	0.95	iTRAQ8plex[+304.20536] (N-term); iTRAQ8plex[+304.20536] (K8); iTRAQ8plex[+304.20536] (K12); iTRAQ8plex[+304.20536] (K24)	2	2	2.50681e+07	4.37052e+07	0.886529	0.0793864	0.726291	4.56664	rep2	Yes
6	Cluster18962	Peptide	GGSTGYDNAVALPAGGR	795.381	1588.75	1588.75	0.63	2	2.31	0	0.95	Delta:H(2)C(2)[+26.01565] (N-term); Deamidated[+0.984016] (N8)	2	4	1.23107e+07	2.88859e+07	0	0	0	0	rep1	No
6	Cluster18962	Peptide	GGSTGYDNAVALPAGGR	933.982	1865.95	1561.75	10	2	7.01	7.19	1		2	61	1.85803e+07	5.16012e+09	0	0	0	0	rep2	No
6	Cluster18962	Peptide	GGSTGYDNAVALPAGGR	996.997	1991.98	1687.78	10	2	4.58	3.95	0.95	Acetyl[+42.010565] (T4); Acetyl[+42.010565] (S3); Acetyl[+42.010565] (Y6)	2	2	2.9565e+06	2.68067e+07	0	0	0	0	rep2	No
6	Cluster18962	Peptide	GGSTGYDNAVALPAGGR	1086.09	2170.16	2170.16	2.76	2	2.31	0	0.95	iTRAQ8plex[+304.20536] (N-term); iTRAQ8plex[+304.20536] (S3)	2	4	1764266	1.84497e+07	1.09677	0.65894	0.675665	5.59482	rep2	Yes
6	Cluster18962	Peptide	GGSTGYDNAVALPAGGR	630.645	1888.91	1888.92	1.91	3	2.41	0	0.95	iTRAQ8plex[+304.20536] (N-term); Cation:Na[+21.981943] (D7); Deamidated[+0.984016] (N8)	2	2	3.15299e+07	5.07183e+07	0.315322	0.473185	47.6933	3.30396	rep2	Yes
6	Cluster18962	Peptide	GGSTGYDNAVALPAGGR	946.991	1891.97	1891.97	1.9	2	2.31	0	0.95	Delta:H(2)C(2)[+26.01565] (N-term); iTRAQ8plex[+304.20536] (S3)	2	3	2.13585e+06	4.92869e+07	1.32793	7.67896	1.13111	188.38	rep2	Yes
6	Cluster18962	Peptide	GGSTGYDNAVALPAGGR	1086.09	2170.16	2170.15	1.84	2	2.31	0	0.95	iTRAQ8plex[+304.20536] (N-term); iTRAQ8plex[+304.20536] (Y6)	2	103	4.94015e+06	8.64677e+08	1.75359	678.742	40.3109	2.14365	rep1	Yes
6	Cluster18962	Peptide	GGSTGYDNAVALPAGGR	944.976	1887.94	1887.94	1.8	2	2.31	0	0.95	iTRAQ8plex[+304.20536] (N-term); Cation:Na[+21.981943] (D7)	2	1	6.58603e+06	6.58603e+06	0.982111	0.558163	0.596258	326.602	rep2	Yes
6	Cluster18962	Peptide	GGSTGYDNAVALPAGGR	924.979	1847.94	1847.94	1.73	2	2.31	0	0.95	iTRAQ8plex[+304.20536] (N-term); Glu->pyro-Glu[-18.010565] (D7)	2	1	1.07853e+07	1.07853e+07	1.07687	15.9485	56.5759	5.0502	rep2	Yes
6	Cluster18962	Peptide	GGSTGYDNAVALPAGGR	635.641	1903.9	1903.9	1.73	3	2.41	0	0.95	iTRAQ8plex[+304.20536] (N-term); Cation:K[+37.955882] (D7)	2	1	2.26318e+07	2.26318e+07	1.20755	0.0728076	0.609154	23.0157	rep2	Yes
6	Cluster18962	Peptide	GGSTGYDNAVALPAGGR	724.719	2171.13	2171.15	1.66	3	2.41	0	0.95	iTRAQ8plex[+304.20536] (N-term); iTRAQ8plex[+304.20536] (Y6); Deamidated[+0.984016] (N8)	2	2	3.36904e+07	4.49379e+07	1.85013	5.29245	0.0846674	0.400413	rep1	Yes
6	Cluster18962	Peptide	GGSTGYDNAVALPAGGR	1238.19	2474.36	2474.36	1.62	2	2.31	0	0.95	iTRAQ8plex[+304.20536] (N-term); iTRAQ8plex[+304.20536] (S3); iTRAQ8plex[+304.20536] (Y6)	2	2	635806	1.67413e+07	1.178	0.336486	0.510287	5.3794	rep2	Yes
6	Cluster18962	Peptide	GGSTGYDNAVALPAGGR	631.663	1891.97	1891.97	1.59	3	2.41	0	0.95	Delta:H(2)C(2)[+26.01565] (N-term); iTRAQ8plex[+304.20536] (Y6)	2	1	1.44664e+07	1.44664e+07	2.88344	1.05451	19.0088	10.7675	rep1	Yes
6	Cluster18962	Peptide	GGSTGYDNAVALPAGGR	960.987	1919.96	1919.96	1.56	2	2.31	0	0.95	iTRAQ8plex[+304.20536] (N-term); Glu->pyro-Glu[-18.010565] (T4)	2	2	1.39959e+07	2.5686e+07	4.98399	1.60226	154.436	306.857	rep1	Yes
6	Cluster18962	Peptide	GGSTGYDNAVALPAGGR	925.467	1848.92	1848.93	1.41	2	2.31	0	0.95	iTRAQ8plex[+304.20536] (N-term); Gln->pyro-Glu[-17.026549] (N8)	2	3	8.82623e+06	2.1917e+07	1.65081	1.15702	0.195562	2.37473	rep1	Yes
6	Cluster18962	Peptide	GGSTGYDNAVALPAGGR	934.475	1866.93	1866.93	1.29	2	2.31	0	0.95	iTRAQ8plex[+304.20536] (N-term); Deamidated[+0.984016] (N8)	2	21	8100706	1.04781e+08	0.91357	6.59674	0.648184	549.602	rep2	Yes
6	Cluster18962	Peptide	GGSTGYDNAVALPAGGR	844.899	1687.78	1687.78	0	2	3.15	3.94	0.95	iTRAQ8plex[+304.20536] (N-term); Octanoyl[+126.104465] (T4)	2	2	3.45243e+06	4.80828e+06	1.43647	93.2432	0.871466	1.3535	rep1	Yes
6	Cluster18962	Peptide	GGSTGYDNAVALPAGGRGDEEELSK	1020.19	3057.55	2753.34	9.5	3	6.69	6.79	1	iTRAQ8plex[+304.20536] (K25)	2	8	7.34719e+06	2.294e+08	0.00835974	4.97293	93.9484	2.13145	rep1	Yes
6	Cluster18962	Peptide	GGSTGYDNAVALPAGGRGDEEELSK	841.438	3361.72	3361.73	2.14	4	2.61	0	0.95	iTRAQ8plex[+304.20536] (N-term); iTRAQ8plex[+304.20536] (K25); Deamidated[+0.984016] (N8)	2	1	1.22262e+07	1.22262e+07	1.12982	0.22553	0.695111	3.90046	rep2	Yes
6	Cluster18962	Peptide	GGSTGYDNAVALPAGGRGDEEELSK	1020.19	3057.54	3057.55	1.96	3	2.41	0	0.95	iTRAQ8plex[+304.20536] (N-term); iTRAQ8plex[+304.20536] (K25)	2	8	7.34719e+06	9.97597e+07	0.00835977	4.97292	93.9486	2.13144	rep1	Yes
6	Cluster18962	Peptide	GGSTGYDNAVALPAGGRGDEEELSKENVK	959.005	3831.98	3527.8	10	4	6.78	2.82	1	iTRAQ8plex[+304.20536] (K25); iTRAQ8plex[+304.20536] (K29)	2	3	7.83335e+06	4.02611e+07	1.08973	0.0386203	78.5833	1.89678	rep2	Yes
6	Cluster18962	Peptide	GGSTGYDNAVALPAGGRGDEEELSKENVK	1278.34	3831.99	3832	2.35	3	2.41	0	0.95	iTRAQ8plex[+304.20536] (N-term); iTRAQ8plex[+304.20536] (K25); iTRAQ8plex[+304.20536] (K29)	2	4	504654	3.87187e+07	0.934398	3.77743	0.628946	1.4052	rep2	Yes
6	Cluster18962	Peptide	GGSTGYDNAVALPAGGRGDEEELSKENVK	959.001	3831.97	3867.88	1.55	4	2.61	0	0.95	iTRAQ8plex[+304.20536] (N-term); iTRAQ8plex[+304.20536] (K25); iTRAQ8plex[+304.20536] (K29); Deamidated[+0.984016] (N8)	2	2	2.28822e+07	3.38311e+07	0.999447	9.9524	0.498153	1.41062	rep1	Yes
6	Cluster18962	Peptide	GRGGSTGYDNAVALPAGGR	841.405	1680.8	1680.8	0	2	2.31	0	0.95	iTRAQ8plex[+304.20536] (N-term); Tyr->Dha[-94.041865] (Y8)	2	1	3.70032e+06	3.70032e+06	0	0	0	0	rep1	No
6	Cluster18962	Peptide	GRGGSTGYDNAVALPAGGR	966.46	1930.9	1930.9	0	2	2.31	0	0.95		2	1	7.56225e+06	7.56225e+06	0	0	0	0	rep1	No
6	Cluster18962	Peptide	GRGGSTGYDNAVALPAGGR	1063.03	2124.04	2124.05	1.88	2	2.31	0	0.95	iTRAQ8plex[+304.20536] (N-term); Carboxy[+43.989829] (D9); Deamidated[+0.984016] (N10)	2	1	7.0828e+06	7.0828e+06	1.55419	0.302466	0.44021	3.15471	rep2	Yes
6	Cluster18962	Peptide	GRGGSTGYDNAVALPAGGR	592.976	1775.9	1775.91	1.86	3	2.41	0	0.95	iTRAQ8plex[+304.20536] (N-term); Deamidated[+0.984016] (N10)	2	1	2.28872e+07	2.28872e+07	0.552715	3.39768	21.0228	1.82793	rep2	Yes
6	Cluster18962	Peptide	GRGGSTGYDNAVALPAGGR	952.972	1903.93	1903.93	1.79	2	2.31	0	0.95	iTRAQ8plex[+304.20536] (N-term)	2	3	1.31553e+07	2.48253e+07	1.24633	6.49976	30.6031	243.523	rep2	Yes
6	Cluster18962	Peptide	GRGGSTGYDNAVALPAGGR	996.997	1991.98	1991.98	1.2	2	2.31	0	0.95	iTRAQ8plex[+304.20536] (N-term); Glu->pyro-Glu[-18.010565] (T6)	2	1	2.9565e+06	2.9565e+06	0.041084	92.7396	20.0827	128.514	rep2	Yes
6	Cluster18962	Peptide	GSSFLDPK	729.921	1457.83	1153.63	10	2	3.02	3.25	0.95	iTRAQ8plex[+304.20536] (K8)	2	18	4.48863e+07	4878567738	1.08344	0.0859443	0.668488	0.0390562	rep2	Yes
6	Cluster18962	Peptide	GSSFLDPK	882.022	1762.03	1762.03	2.16	2	2.31	0	0.95	iTRAQ8plex[+304.20536] (N-term); iTRAQ8plex[+304.20536] (K8); iTRAQ8plex[+304.20536] (S3)	2	1	3.71577e+06	3.71577e+06	1.02836	0.0918454	0.644345	482.362	rep2	Yes
6	Cluster18962	Peptide	GSSFLDPK	729.921	1457.83	1457.82	2.06	2	2.31	0	0.95	iTRAQ8plex[+304.20536] (N-term); iTRAQ8plex[+304.20536] (K8)	2	68	7.18658e+06	5.05914e+08	484.094	6.59161	0.307954	0.00953757	rep1	Yes
6	Cluster18962	Peptide	GSSFLDPKGR	456.59	1366.75	1062.55	10	3	3.33	4.17	1		2	2	4.06986e+07	7.47998e+07	0	0	0	0	rep1	No
6	Cluster18962	Peptide	GSSFLDPKGR	470.597	1408.77	1104.56	10	3	3.05	3.41	0.95	Acetyl[+42.010565] (K8)	2	1	6.24637e+07	6.24637e+07	0	0	0	0	rep1	No
6	Cluster18962	Peptide	GSSFLDPKGR	836.481	1670.95	1366.75	9.5	2	2.75	2.82	0.95	iTRAQ8plex[+304.20536] (K8)	2	1	2.10102e+07	2.10102e+07	0.00701541	8.39494	0.465492	276.077	rep1	Yes
6	Cluster18962	Peptide	GSSFLDPKGR	557.992	1670.95	1670.96	2.33	3	2.41	0	0.95	iTRAQ8plex[+304.20536] (N-term); iTRAQ8plex[+304.20536] (K8)	2	1	2.1105e+07	2.1105e+07	0.783858	0.138746	44.8031	10.571	rep2	Yes
6	Cluster18962	Peptide	GTGTANQCPTIDGGSETFSFKPGK	843.191	3368.73	3064.54	10	4	5.16	3.16	1	Carbamidomethyl[+57.021464] (C8); iTRAQ8plex[+304.20536] (K21); iTRAQ8plex[+304.20536] (K24)	2	1	4.8658e+06	4.8658e+06	1.05523	0.388642	59.0826	496.722	rep2	Yes
6	Cluster18962	Peptide	GTGTANQCPTIDGGSETFSFKPGK	916.484	3661.91	3661.92	2.95	4	2.61	0	0.95	iTRAQ8plex[+304.20536] (N-term); iTRAQ8plex[+304.20536] (K21); iTRAQ8plex[+304.20536] (K24); iTRAQ8plex[+304.20536] (S19); Methylthio (C8)	2	3	2.24919e+06	2.3473e+07	0.0153007	0.0787975	0.677792	4.76569	rep2	Yes
6	Cluster18962	Peptide	GTGTANQCPTIDGGSETFSFKPGK	733.385	3661.88	3661.89	2.46	5	2.61	0	0.95	iTRAQ8plex[+304.20536] (N-term); iTRAQ8plex[+304.20536] (K21); iTRAQ8plex[+304.20536] (K24); Deamidated[+0.984016] (N6); Methylthio (C8)	2	1	8.98826e+06	8.98826e+06	1.21351	0.196641	0.707865	0.143151	rep2	Yes
6	Cluster18962	Peptide	GTGTANQCPTIDGGSETFSFKPGK	840.681	3358.69	3358.69	2.14	4	2.61	0	0.95	iTRAQ8plex[+304.20536] (N-term); iTRAQ8plex[+304.20536] (K21); iTRAQ8plex[+304.20536] (K24); Deamidated[+0.984016] (Q7); Methylthio (C8)	2	4	2.0833e+06	1.41061e+07	0.900451	0.32245	0.0187987	244.826	rep2	Yes
6	Cluster18962	Peptide	GTGTANQCPTIDGGSETFSFKPGK	845.927	3379.68	3379.68	2.01	4	2.61	0	0.95	iTRAQ8plex[+304.20536] (N-term); iTRAQ8plex[+304.20536] (K21); iTRAQ8plex[+304.20536] (K24); Methylthio (C8); Cation:Na[+21.981943] (E16)	2	1	1.26095e+07	1.26095e+07	1.00295	0.0568532	0.710079	0.133098	rep2	Yes
6	Cluster18962	Peptide	GTGTANQCPTIDGGSETFSFKPGK	1119.91	3356.69	3035.49	1.98	3	2.41	0	0.95	iTRAQ8plex[+304.20536] (N-term); iTRAQ8plex[+304.20536] (K21); iTRAQ8plex[+304.20536] (K24); Methylthio (C8)	2	83	3.17119e+06	6.74485e+08	0.864084	7.77942	30.3549	0.0580888	rep2	Yes
6	Cluster18962	Peptide	GTGTANQCPTIDGGSETFSFKPGK	1114.24	3339.68	3339.69	1.8	3	2.41	0	0.95	iTRAQ8plex[+304.20536] (N-term); iTRAQ8plex[+304.20536] (K21); iTRAQ8plex[+304.20536] (K24); Methylthio (C8); Glu->pyro-Glu[-18.010565] (T17)	2	1	3.67044e+06	3.67044e+06	1.01264	7.07104	0.677854	0.0347942	rep2	Yes
6	Cluster18962	Peptide	IQGVWYGQLE	748.904	1495.79	1191.59	10	2	3.38	4.15	0.95		2	17	3.42879e+07	2.09271e+08	0	0	0	0	rep1	No
6	Cluster18962	Peptide	IQGVWYGQLE	901.004	1799.99	1800	2.22	2	2.31	0	0.95	iTRAQ8plex[+304.20536] (N-term); iTRAQ8plex[+304.20536] (Y6)	2	177	1.14827e+07	1202854285	0.00676976	0.114344	0.627516	0.117631	rep2	Yes
6	Cluster18962	Peptide	IQGVWYGQLE	748.905	1495.8	1495.78	1.6	2	2.31	0	0.95	iTRAQ8plex[+304.20536] (N-term)	2	55	8.50662e+06	3.68794e+08	0.68493	0.452208	0.542642	23.9788	rep2	Yes
6	Cluster18962	Peptide	IQGVWYGQLE	759.894	1517.77	1517.77	0.79	2	2.31	0	0.95	iTRAQ8plex[+304.20536] (N-term); Cation:Na[+21.981943] (E10)	2	1	3.96808e+06	3.96808e+06	0.0163422	6.24937	35.4352	2.65942	rep1	Yes
6	Cluster18962	Peptide	IQGVWYGQLE	755.912	1509.81	1509.81	0.79	2	2.31	0	0.95	iTRAQ8plex[+304.20536] (N-term); Pro->pyro-Glu[+13.979265] (I1)	2	1	7.68673e+06	7.68673e+06	0.226728	0.0456785	0.348537	4.12964	rep1	Yes
6	Cluster18962	Peptide	IQGVWYGQLE	755.913	1509.81	1509.81	0.66	2	2.31	0	0.95	iTRAQ8plex[+304.20536] (N-term); Pro->pyro-Glu[+13.979265] (Q2)	2	1	1.52719e+07	1.52719e+07	0.138454	29.3635	0.0144282	3.08106	rep1	Yes
6	Cluster18962	Peptide	IQGVWYGQLE	750.901	1499.79	1499.79	0	2	2.31	0	0.95	iTRAQ8plex[+304.20536] (N-term); Trp->Kynurenin[+3.994915] (W5)	2	2	3.64095e+06	1.55226e+07	1.22025	1.2372	0.968736	7.83876	rep2	Yes
6	Cluster18962	Peptide	IQGVWYGQLE	749.4	1496.79	1496.79	0	2	2.31	0	0.95	iTRAQ8plex[+304.20536] (N-term); Deamidated[+0.984016] (Q2)	2	1	9.42986e+06	9.42986e+06	8.96233	1.90106	14.0912	0.680952	rep1	Yes
6	Cluster18962	Peptide	KFCFEPTSFTVK	777.453	2329.34	2391.31	2.63	3	2.41	0	0.95	iTRAQ8plex[+304.20536] (N-term); iTRAQ8plex[+304.20536] (K1); iTRAQ8plex[+304.20536] (K12); Methylthio (C3)	2	28	1.25804e+07	2.15484e+08	62.1972	0.190436	67.1673	0.117104	rep2	Yes
6	Cluster18962	Peptide	LTYDEIQSK	625.815	1249.61	1249.61	5.59	2	3.1	2.42	0.95	Acetyl[+42.010565] (T2); Acetyl[+42.010565] (S8); Acetyl[+42.010565] (Y3); Dimethyl[+28.0313] (K9)	2	1	1.06255e+07	1.06255e+07	0	0	0	0	rep1	No
6	Cluster18962	Peptide	LTYDEIQSK	852.981	1703.95	1399.75	10	2	4.48	4.92	0.99	iTRAQ8plex[+304.20536] (K9)	2	21	4.19415e+08	1511176710	0.879212	7.86605	0.608177	0.0327889	rep2	Yes
6	Cluster18962	Peptide	LTYDEIQSK	1005.08	2008.15	2008.16	2.99	2	2.31	0	0.95	iTRAQ8plex[+304.20536] (N-term); iTRAQ8plex[+304.20536] (K9); iTRAQ8plex[+304.20536] (S8)	2	1	951484	951484	0.996252	0.259616	39.2835	249.766	rep2	Yes
6	Cluster18962	Peptide	LTYDEIQSK	843.981	1685.95	1685.95	2.25	2	2.31	0	0.95	iTRAQ8plex[+304.20536] (N-term); iTRAQ8plex[+304.20536] (K9); Glu->pyro-Glu[-18.010565] (D4)	2	1	1.82943e+07	1.82943e+07	1.23983	0.0693788	0.619638	0.00784115	rep2	Yes
6	Cluster18962	Peptide	LTYDEIQSK	852.982	1703.95	1703.95	2.23	2	2.31	0	0.95	iTRAQ8plex[+304.20536] (N-term); iTRAQ8plex[+304.20536] (K9)	2	43	1.38456e+07	5.44887e+08	1.08303	0.142991	60.8884	0.0293651	rep2	Yes
6	Cluster18962	Peptide	LTYDEIQSK	1005.09	2008.15	2008.15	1.99	2	2.31	0	0.95	iTRAQ8plex[+304.20536] (N-term); iTRAQ8plex[+304.20536] (K9); iTRAQ8plex[+304.20536] (Y3)	2	6	8.08446e+06	5.8189e+07	1.48522	4.50134	0.331936	1.78063	rep1	Yes
6	Cluster18962	Peptide	LTYTLDEIEGPFEVSSDGSVNFK	1052.54	3154.61	2850.41	10	3	5.28	6.22	1	iTRAQ8plex[+304.20536] (K23)	2	32	2.05341e+06	1.52799e+08	1.11304	9.3284	0.571578	0.473496	rep2	Yes
6	Cluster18962	Peptide	LTYTLDEIEGPFEVSSDGSVNFK	865.709	3458.8	3458.81	2.66	4	2.61	0	0.95	iTRAQ8plex[+304.20536] (N-term); iTRAQ8plex[+304.20536] (K23); iTRAQ8plex[+304.20536] (S16)	2	2	4.99928e+06	7.43564e+06	1.1011	0.154457	0.629154	0.380786	rep2	Yes
6	Cluster18962	Peptide	LTYTLDEIEGPFEVSSDGSVNFK	865.712	3458.82	3458.82	2.2	4	2.61	0	0.95	iTRAQ8plex[+304.20536] (N-term); iTRAQ8plex[+304.20536] (K23); iTRAQ8plex[+304.20536] (Y3)	2	7	4.53364e+06	2.31734e+07	1.80388	0.0887482	0.363351	0.273683	rep1	Yes
6	Cluster18962	Peptide	LTYTLDEIEGPFEVSSDGSVNFK	865.708	3458.8	3458.81	2.2	4	2.61	0	0.95	iTRAQ8plex[+304.20536] (N-term); iTRAQ8plex[+304.20536] (K23); iTRAQ8plex[+304.20536] (S15)	2	12	4.90797e+06	4.54297e+07	1.76645	0.10468	43.5631	0.218478	rep1	Yes
6	Cluster18962	Peptide	LTYTLDEIEGPFEVSSDGSVNFK	1052.55	3154.61	3153.62	1.9	3	2.41	0	0.95	iTRAQ8plex[+304.20536] (N-term); iTRAQ8plex[+304.20536] (K23)	2	84	2.02351e+06	3.8878e+08	1.06881	6.89933	0.608203	0.444292	rep2	Yes
6	Cluster18962	Peptide	NAPPDFQNTK	870.477	1738.94	1434.74	10	2	4.16	4.89	0.98	iTRAQ8plex[+304.20536] (K10)	2	17	5.42037e+07	4292344845	0.0115538	0.0726211	0.610214	0.0517318	rep2	Yes
6	Cluster18962	Peptide	NAPPDFQNTK	870.481	1738.95	1434.74	2.93	2	2.31	0	0.95	iTRAQ8plex[+304.20536] (N-term); iTRAQ8plex[+304.20536] (K10)	2	68	5.83908e+06	7.59107e+08	83.248	0.350425	0.615249	0.0304364	rep2	Yes
6	Cluster18962	Peptide	NAPPDFQNTK	871.459	1740.9	1740.9	1.38	2	2.31	0	0.95	iTRAQ8plex[+304.20536] (N-term); iTRAQ8plex[+304.20536] (K10); Deamidated[+0.984016] (N1); Deamidated[+0.984016] (N8)	2	1	7.91249e+06	7.91249e+06	0.0270617	20.1577	0.440253	489.681	rep2	Yes
6	Cluster18962	Peptide	NAPPDFQNTK	899.983	1797.95	1739.92	0.57	2	2.31	0	0.95	iTRAQ8plex[+304.20536] (N-term); iTRAQ8plex[+304.20536] (K10); Deamidated[+0.984016] (N8)	2	1	4.68969e+06	4.68969e+06	0.0322813	136.274	19.9232	15.4085	rep1	Yes
6	Cluster18962	Peptide	NAPPDFQNTKLMTR	646.344	1936.01	1631.81	10	3	4.25	3.64	0.96		2	1	1.45303e+07	1.45303e+07	0	0	0	0	rep2	No
6	Cluster18962	Peptide	NTAASVGEITLK	775.446	1548.88	1244.66	10	2	4.65	3.27	0.95	Acetyl[+42.010565] (K12)	2	1	1.4606e+07	1.4606e+07	0	0	0	0	rep1	No
6	Cluster18962	Peptide	NTAASVGEITLK	906.535	1811.05	1506.86	10	2	6.4	7.85	1	iTRAQ8plex[+304.20536] (K12)	2	45	7.51814e+06	2636281777	0.00956277	0.0794107	69.1094	524.067	rep2	Yes
6	Cluster18962	Peptide	NTAASVGEITLK	1058.64	2115.26	2115.27	2.84	2	2.31	0	0.95	iTRAQ8plex[+304.20536] (N-term); iTRAQ8plex[+304.20536] (K12); iTRAQ8plex[+304.20536] (T2)	2	1	1.11985e+06	1.11985e+06	1.01324	0.178594	0.71331	338.873	rep2	Yes
6	Cluster18962	Peptide	NTAASVGEITLK	913.542	1825.07	1825.07	2.52	2	2.31	0	0.95	iTRAQ8plex[+304.20536] (N-term); iTRAQ8plex[+304.20536] (K12); Pro->pyro-Glu[+13.979265] (L11)	2	2	4.62046e+06	1.92264e+07	29.5403	0.105144	29.5442	4.66945	rep2	Yes
6	Cluster18962	Peptide	NTAASVGEITLK	906.534	1811.05	1506.85	2.39	2	2.31	0	0.95	iTRAQ8plex[+304.20536] (N-term); iTRAQ8plex[+304.20536] (K12)	2	34	1.37959e+07	3.56471e+08	1.12124	1.97158	0.22555	1.1982	rep1	Yes
6	Cluster18962	Peptide	NTAASVGEITLK	917.523	1833.03	1833.04	2.18	2	2.31	0	0.95	iTRAQ8plex[+304.20536] (N-term); iTRAQ8plex[+304.20536] (K12); Cation:Na[+21.981943] (E8)	2	2	9.16577e+06	2.14238e+07	1.19038	0.115613	0.616581	4.8299	rep2	Yes
6	Cluster18962	Peptide	NTAASVGEITLK	1059.13	2116.24	2116.25	1.89	2	2.31	0	0.95	iTRAQ8plex[+304.20536] (N-term); iTRAQ8plex[+304.20536] (K12); iTRAQ8plex[+304.20536] (S5); Deamidated[+0.984016] (N1)	2	1	1.21574e+06	1.21574e+06	1.19724	0.590559	0.670162	5.34216	rep2	Yes
6	Cluster18962	Peptide	NTAASVGEITLK	760.434	1518.85	1518.85	1.58	2	2.31	0	0.95	Acetyl[+42.010565] (N-term); iTRAQ8plex[+304.20536] (K12)	2	1	1.94975e+07	1.94975e+07	0.028465	0.550259	31.5897	6.75464	rep2	Yes
6	Cluster18962	Peptide	NTAASVGEITLK	804.441	1606.87	1606.87	0	2	2.31	0	0.95	Carbamyl[+43.005814] (N-term); iTRAQ8plex[+304.20536] (K12)	2	2	1.7272e+07	2.05743e+07	0.0148207	1.00402	0.81706	171.55	rep2	Yes
6	Cluster18962	Peptide	NTAASVGEITLK	767.425	1532.83	1532.83	0	2	2.31	0	0.95	Delta:H(2)C(2)[+26.01565] (N-term); iTRAQ8plex[+304.20536] (K12)	2	2	1.47284e+07	2.19375e+07	0.0191818	3.33444	32.9044	0.302899	rep1	Yes
6	Cluster18962	Peptide	NTAASVGEITLKVTK	819.469	2455.38	2443.39	2.82	3	2.41	0	0.95	iTRAQ8plex[+304.20536] (N-term); iTRAQ8plex[+304.20536] (K12); iTRAQ8plex[+304.20536] (K15)	2	1	2.10502e+06	2.10502e+06	91.7078	3.25065	0.406656	99.7461	rep1	Yes
6	Cluster18962	Peptide	QLDASGKPDNFTGK	696.049	2085.12	1780.93	10	3	4.79	5.35	1	iTRAQ8plex[+304.20536] (K14)	2	3	5.04066e+07	1.40096e+08	0.798888	0.0946273	0.618479	0.0677462	rep2	Yes
6	Cluster18962	Peptide	QLDASGKPDNFTGK	797.449	2389.32	2085.13	10	3	4.45	5.99	1	iTRAQ8plex[+304.20536] (K7); iTRAQ8plex[+304.20536] (K14)	2	20	8.89414e+06	7.0078e+08	0.881936	0.131685	0.590784	4.79799	rep2	Yes
6	Cluster18962	Peptide	QLDASGKPDNFTGK	1056.58	2111.14	2111.15	2.84	2	2.31	0	0.95	Delta:H(2)C(2)[+26.01565] (N-term); iTRAQ8plex[+304.20536] (K7); iTRAQ8plex[+304.20536] (K14)	2	1	1.80656e+06	1.80656e+06	0.789146	0.225087	0.588714	5.28343	rep2	Yes
6	Cluster18962	Peptide	QLDASGKPDNFTGK	791.443	2371.31	2371.31	2.4	3	2.41	0	0.95	iTRAQ8plex[+304.20536] (N-term); iTRAQ8plex[+304.20536] (K7); iTRAQ8plex[+304.20536] (K14); Glu->pyro-Glu[-18.010565] (D9)	2	1	6.32386e+06	6.32386e+06	1.10187	0.272055	0.570586	4.27214	rep2	Yes
6	Cluster18962	Peptide	QLDASGKPDNFTGK	791.449	2371.32	2371.33	2.15	3	2.41	0	0.95	iTRAQ8plex[+304.20536] (N-term); iTRAQ8plex[+304.20536] (K7); iTRAQ8plex[+304.20536] (K14); Glu->pyro-Glu[-18.010565] (S5)	2	1	8.695e+06	8.695e+06	0.950754	0.139041	44.3765	1.45531	rep2	Yes
6	Cluster18962	Peptide	QLDASGKPDNFTGK	1035.06	2068.1	2068.09	1.93	2	2.31	0	0.95	Gln->pyro-Glu[-17.026549] (N-term); iTRAQ8plex[+304.20536] (K7); iTRAQ8plex[+304.20536] (K14)	2	20	1.57653e+07	218744812	1.01489	0.081432	0.676734	0.0526629	rep2	Yes
6	Cluster18962	Peptide	QLDASGKPDNFTGK	788.445	2362.31	2085.13	1.87	3	2.41	0	0.95	iTRAQ8plex[+304.20536] (N-term); iTRAQ8plex[+304.20536] (K7); iTRAQ8plex[+304.20536] (K14)	2	51	1.44072e+07	4.16206e+08	0.717923	2.58069	0.144972	1.74067	rep1	Yes
6	Cluster18962	Peptide	QLDASGKPDNFTGK	1196.16	2390.31	2390.31	1.67	2	2.31	0	0.95	iTRAQ8plex[+304.20536] (N-term); iTRAQ8plex[+304.20536] (K7); iTRAQ8plex[+304.20536] (K14); Deamidated[+0.984016] (N10)	2	3	2.23841e+06	2.80672e+07	0.951327	0.147816	0.64692	4.89174	rep2	Yes
6	Cluster18962	Peptide	QLDASGKPDNFTGK	1035.55	2069.08	2069.09	0.97	2	2.31	0	0.95	Gln->pyro-Glu[-17.026549] (N-term); iTRAQ8plex[+304.20536] (K7); iTRAQ8plex[+304.20536] (K14); Deamidated[+0.984016] (N10)	2	2	1.22586e+07	1.79036e+07	2.72375	3.37137	0.204793	2.49109	rep1	Yes
6	Cluster18962	Peptide	RLTYDEIQSK	533.63	1597.87	1293.66	10	3	4.75	3.24	0.95	Acetyl[+42.010565] (S9)	2	2	6.70909e+07	1.30989e+08	0	0	0	0	rep2	No
6	Cluster18962	Peptide	RLTYDEIQSK	799.94	1597.86	1293.66	10	2	3.69	3.24	0.95	Acetyl[+42.010565] (K10)	2	1	7.84211e+06	7.84211e+06	0	0	0	0	rep2	No
6	Cluster18962	Peptide	RLTYDEIQSK	621.024	1860.04	1555.85	10	3	4.8	5.37	1	iTRAQ8plex[+304.20536] (K10)	2	50	1.25864e+08	3094020491	0.00674804	0.0909601	0.668892	0.0419802	rep2	Yes
6	Cluster18962	Peptide	RLTYDEIQSK	1083.14	2164.26	2164.26	2.77	2	2.31	0	0.95	iTRAQ8plex[+304.20536] (N-term); iTRAQ8plex[+304.20536] (K10); iTRAQ8plex[+304.20536] (Y4)	2	1	6.28441e+06	6.28441e+06	1.53818	0.0481336	0.448425	0.0113251	rep1	Yes
6	Cluster18962	Peptide	RLTYDEIQSK	722.424	2164.25	2164.26	2.5	3	2.41	0	0.95	iTRAQ8plex[+304.20536] (N-term); iTRAQ8plex[+304.20536] (K10); iTRAQ8plex[+304.20536] (S9)	2	1	1.23555e+07	1.23555e+07	1.17158	3.73331	46.9882	1.21306	rep2	Yes
6	Cluster18962	Peptide	RLTYDEIQSK	799.94	1597.86	1860.06	2.26	2	2.31	0	0.95	iTRAQ8plex[+304.20536] (N-term); iTRAQ8plex[+304.20536] (K10)	2	111	7.84211e+06	892741799	0.694262	0.0876775	28.4134	200.063	rep2	Yes
6	Cluster18962	Peptide	RLTYDEIQSK	791.94	1581.86	1581.87	1.64	2	2.31	0	0.95	Delta:H(2)C(2)[+26.01565] (N-term); iTRAQ8plex[+304.20536] (K10)	2	3	1.89825e+07	4.38221e+07	2.43975	1.60213	0.540195	1.06029	rep1	Yes
6	Cluster18962	Peptide	SKPETGEVIGVFESLQPSDTDLGAK	1172.98	3515.91	3211.71	9.5	3	6.22	7.01	1	iTRAQ8plex[+304.20536] (K2); iTRAQ8plex[+304.20536] (K25)	2	27	7.45498e+06	1.6648e+08	0.016997	0.0740981	0.443681	0.249148	rep1	Yes
6	Cluster18962	Peptide	SKPETGEVIGVFESLQPSDTDLGAK	765.029	3820.11	3820.12	2.09	5	2.61	0	0.95	iTRAQ8plex[+304.20536] (N-term); iTRAQ8plex[+304.20536] (K2); iTRAQ8plex[+304.20536] (K25); iTRAQ8plex[+304.20536] (S14)	2	1	7.83687e+06	7.83687e+06	1.4627	5.23846	0.402089	0.562645	rep1	Yes
6	Cluster18962	Peptide	SKPETGEVIGVFESLQPSDTDLGAK	1080.25	3237.72	3237.73	1.85	3	2.41	0	0.95	Delta:H(2)C(2)[+26.01565] (N-term); iTRAQ8plex[+304.20536] (K2); iTRAQ8plex[+304.20536] (K25)	2	7	1.57569e+07	6.94948e+07	0.917964	0.137299	0.637759	1.2613	rep2	Yes
6	Cluster18962	Peptide	SKPETGEVIGVFESLQPSDTDLGAK	1172.64	3514.91	3514.9	1.71	3	2.41	0	0.95	iTRAQ8plex[+304.20536] (N-term); iTRAQ8plex[+304.20536] (K2); iTRAQ8plex[+304.20536] (K25)	2	54	7.92442e+06	3.23518e+08	0.951391	8.74093	32.1614	0.947752	rep2	Yes
6	Cluster18962	Peptide	TYMEVK	689.894	1377.77	1073.57	9.5	2	2.9	2.5	0.95	iTRAQ8plex[+304.20536] (K6)	2	7	1.82549e+07	1933467703	1.09803	7.61479	0.136792	4.47522	rep1	Yes
6	Cluster18962	Peptide	TYMEVK	841.995	1681.97	1681.98	3.92	2	2.31	0	0.95	iTRAQ8plex[+304.20536] (N-term); iTRAQ8plex[+304.20536] (K6); iTRAQ8plex[+304.20536] (Y2)	2	2	1.36664e+07	2.815e+07	0.966765	0.0936565	0.62731	0.0108135	rep2	Yes
6	Cluster18962	Peptide	TYMEVK	689.894	1377.77	1377.77	2.9	2	2.31	0	0.95	iTRAQ8plex[+304.20536] (N-term); iTRAQ8plex[+304.20536] (K6)	2	16	2.15632e+07	1.23107e+08	1.0774	0.0869765	0.61208	2.41468	rep2	Yes
6	Cluster18962	Peptide	VPFLFTVK	627.89	1253.77	949.564	10	2	2.77	3.66	0.95		2	3	4.30669e+07	8.98467e+07	0	0	0	0	rep1	No
6	Cluster18962	Peptide	VPFLFTVK	779.993	1557.97	1253.77	9.5	2	3.25	3.68	0.95	iTRAQ8plex[+304.20536] (K8)	2	156	6.68794e+07	20784327852	1.03181	8.02799	0.462847	6.13289	rep1	Yes
6	Cluster18962	Peptide	VPFLFTVK	779.991	1557.97	1557.96	2.57	2	2.31	0	0.95	iTRAQ8plex[+304.20536] (N-term); iTRAQ8plex[+304.20536] (K8)	2	181	1.0464e+07	9.75987e+08	0.0305371	0.0631864	21.8047	51.4211	rep2	Yes
6	Cluster18962	Peptide	VTKSKPETGEVIGVFESLQPSDTDLGAK	830.654	4148.23	4148.23	2.05	5	2.61	0	0.95	iTRAQ8plex[+304.20536] (N-term); iTRAQ8plex[+304.20536] (K3); iTRAQ8plex[+304.20536] (K5); iTRAQ8plex[+304.20536] (K28)	2	3	1.23045e+07	2.44722e+07	7.01676	6.21791	5.62556	11.0389	rep1	Yes
6	Cluster18962	Peptide	VTKSKPETGEVIGVFESLQPSDTDLGAK	830.857	4149.24	4149.24	1.81	5	2.61	0	0.95	iTRAQ8plex[+304.20536] (N-term); iTRAQ8plex[+304.20536] (K3); iTRAQ8plex[+304.20536] (K5); iTRAQ8plex[+304.20536] (K28); Deamidated[+0.984016] (Q19)	2	1	1.09901e+07	1.09901e+07	1.56888	4.67719	2.81563	5.90787	rep1	Yes
7	Cluster32146	Peptide	AHGGVSVFGGVGKR	553.634	1657.88	1657.88	3.26	3	2.41	0	0.95	iTRAQ8plex[+304.20536] (N-term); iTRAQ8plex[+304.20536] (K13); Delta:H(2)C(2)[+26.01565] (H2)	2	1	2.61114e+07	2.61114e+07	0.0116112	0.29986	0.595425	24.6064	rep2	Yes
7	Cluster32146	Peptide	AHGGVSVFGGVGKR	485.024	1936.07	1936.07	2.89	4	2.61	0	0.95	iTRAQ8plex[+304.20536] (N-term); iTRAQ8plex[+304.20536] (K13); iTRAQ8plex[+304.20536] (H2)	2	3	7.19314e+06	1.22236e+07	1.12932	0.0776501	0.354992	0.0757134	rep1	Yes
7	Cluster32146	Peptide	AHGGVSVFGGVGKR	646.361	1936.06	1936.06	2.63	3	2.41	0	0.95	iTRAQ8plex[+304.20536] (N-term); iTRAQ8plex[+304.20536] (K13); iTRAQ8plex[+304.20536] (S6)	2	11	1.0376e+06	3.84575e+07	1.31527	0.163235	0.399519	135.652	rep1	Yes
7	Cluster32146	Peptide	AHGGVSVFGGVGKR	544.962	1631.86	1631.86	2.02	3	2.41	0	0.95	iTRAQ8plex[+304.20536] (N-term); iTRAQ8plex[+304.20536] (K13)	2	458	1.60361e+06	3007248576	1.4742	0.17697	0.370387	0.405496	rep1	Yes
7	Cluster32146	Peptide	ATNLEMESK	815.95	1629.88	1325.68	10	2	4.77	5.53	1	iTRAQ8plex[+304.20536] (K9)	2	12	4.08165e+06	1828648029	0.00934633	0.244681	72.6335	242.858	rep2	Yes
7	Cluster32146	Peptide	ATNLEMESK	815.946	1629.88	1325.68	3.02	2	2.31	0	0.95	iTRAQ8plex[+304.20536] (N-term); iTRAQ8plex[+304.20536] (K9)	2	8	1.30484e+07	8.35481e+07	0.718224	0.158342	60.5359	1.59432	rep2	Yes
7	Cluster32146	Peptide	ATNLEMESK	816.445	1630.87	1630.88	1.84	2	2.31	0	0.95	iTRAQ8plex[+304.20536] (N-term); iTRAQ8plex[+304.20536] (K9); Deamidated[+0.984016] (N3)	2	1	1.39668e+07	1.39668e+07	0.0178715	0.101237	50.2689	3.16462	rep2	Yes
7	Cluster32146	Peptide	DVNEQDVLLFIDNIFR	1127.6	2253.19	1948.99	10	2	7.52	7.32	1		2	42	6.06801e+06	9.02625e+08	0	0	0	0	rep1	No
7	Cluster32146	Peptide	DVNEQDVLLFIDNIFR	746.401	2236.18	2236.18	1.61	3	2.41	0	0.95	iTRAQ8plex[+304.20536] (N-term); Gln->pyro-Glu[-17.026549] (N3)	2	1	1.31832e+07	1.31832e+07	0.00991875	0.0877475	71.4386	0.0460527	rep2	Yes
7	Cluster32146	Peptide	DVNEQDVLLFIDNIFR	746.066	2235.17	2235.18	1.61	3	2.41	0	0.95	iTRAQ8plex[+304.20536] (N-term); Glu->pyro-Glu[-18.010565] (D6)	2	1	2.9593e+07	2.9593e+07	0.00877304	0.0555532	0.688315	1.30893	rep2	Yes
7	Cluster32146	Peptide	DVNEQDVLLFIDNIFR	759.399	2275.17	2275.17	1.32	3	2.41	0	0.95	iTRAQ8plex[+304.20536] (N-term); Cation:Na[+21.981943] (D6)	2	3	2.07558e+07	4.36795e+07	4.94988	0.0427546	100.403	0.542212	rep1	Yes
7	Cluster32146	Peptide	DVNEQDVLLFIDNIFR	1128.1	2254.18	2254.17	0.89	2	2.31	0	0.95	iTRAQ8plex[+304.20536] (N-term); Deamidated[+0.984016] (N13)	2	3	7.37712e+06	2.49757e+07	0.03712	0.0657443	0.435172	50.6645	rep1	Yes
7	Cluster32146	Peptide	DVNEQDVLLFIDNIFR	1127.6	2253.19	2253.17	0.89	2	2.31	0	0.95	iTRAQ8plex[+304.20536] (N-term)	2	51	9.80351e+06	3.31959e+08	1.43179	6.71184	85.867	27.343	rep1	Yes
7	Cluster32146	Peptide	EGNDLYMEMK	919.464	1836.91	1532.72	10	2	4.53	5.8	1	iTRAQ8plex[+304.20536] (K10)	2	4	2.33803e+07	5.35739e+08	0.0127304	0.0910417	57.6111	0.00831738	rep2	Yes
7	Cluster32146	Peptide	EGNDLYMEMK	919.464	1836.91	1532.71	2.61	2	2.31	0	0.95	iTRAQ8plex[+304.20536] (N-term); iTRAQ8plex[+304.20536] (K10)	2	2	2.33803e+07	4.74091e+07	0.0127304	0.0910417	57.6112	0.00831739	rep2	Yes
7	Cluster32146	Peptide	EGNDLYMEMK	714.713	2141.12	2141.12	2.52	3	2.41	0	0.95	iTRAQ8plex[+304.20536] (N-term); iTRAQ8plex[+304.20536] (K10); iTRAQ8plex[+304.20536] (Y6)	2	1	2.33267e+07	2.33267e+07	1.14798	0.0912221	51.2786	11.001	rep2	Yes
7	Cluster32146	Peptide	EGNDLYMEMK	919.957	1837.9	1837.9	1.31	2	2.31	0	0.95	iTRAQ8plex[+304.20536] (N-term); iTRAQ8plex[+304.20536] (K10); Deamidated[+0.984016] (N3)	2	2	2.87043e+07	5.0498e+07	1.09823	0.085911	0.680579	0.00765248	rep2	Yes
7	Cluster32146	Peptide	EGNDLYMEMK	780.371	1558.73	1558.73	1.28	2	2.31	0	0.95	Delta:H(2)C(2)[+26.01565] (N-term); iTRAQ8plex[+304.20536] (K10)	2	1	2.08861e+07	2.08861e+07	1.04651	1.82407	40.3018	1.98992	rep1	Yes
7	Cluster32146	Peptide	ELQDIIAILGLDELSEEDR	1085.54	2169.06	2169.06	0.92	2	2.31	0	0.95	Glu->pyro-Glu[-18.010565] (N-term); Deamidated[+0.984016] (Q3); Oxidation[+15.994915] (D4)	2	1	627524	627524	0	0	0	0	rep2	No
7	Cluster32146	Peptide	ELQDIIAILGLDELSEEDR	1238.16	2474.3	2170.1	10	2	6.43	6.37	1		2	21	9.52665e+06	9.32756e+08	0	0	0	0	rep1	No
7	Cluster32146	Peptide	ELQDIIAILGLDELSEEDR	695.636	2778.51	2778.52	2.74	4	2.61	0	0.95	iTRAQ8plex[+304.20536] (N-term); iTRAQ8plex[+304.20536] (S15)	2	1	1.5607e+06	1.5607e+06	1.21693	6.49976	0.554515	0.193371	rep2	Yes
7	Cluster32146	Peptide	ELQDIIAILGLDELSEEDR	1238.16	2474.3	2473.28	1.62	2	2.31	0	0.95	iTRAQ8plex[+304.20536] (N-term)	2	26	6.61861e+06	1.8286e+08	0.0127404	2.74638	0.00218474	0.0185317	rep1	Yes
7	Cluster32146	Peptide	ELQDIIAILGLDELSEEDR	629.071	2512.25	2512.26	1.43	4	2.61	0	0.95	iTRAQ8plex[+304.20536] (N-term); Cation:K[+37.955882] (D12)	2	1	5.46969e+06	5.46969e+06	0.0264456	0.0730752	37.1101	0.261802	rep1	Yes
7	Cluster32146	Peptide	ELQDIIAILGLDELSEEDR	819.773	2456.3	2456.3	1.34	3	2.41	0	0.95	iTRAQ8plex[+304.20536] (N-term); Glu->pyro-Glu[-18.010565] (S15)	2	1	1.49057e+07	1.49057e+07	0.0131115	0.122861	0.695349	81.4219	rep2	Yes
7	Cluster32146	Peptide	ESGVINELSLAEFK	1056.09	2110.17	2096.15	1.91	2	2.31	0	0.95	iTRAQ8plex[+304.20536] (N-term); iTRAQ8plex[+304.20536] (K14)	2	8	5.97823e+06	6.84867e+07	36.2686	0.0212589	24.5787	350.566	rep2	Yes
7	Cluster32146	Peptide	FVQAGSEVSALLGR	579.999	1736.97	1432.77	10	3	5.57	8.29	1		2	126	1.16355e+09	8.98983e+09	0	0	0	0	rep2	No
7	Cluster32146	Peptide	FVQAGSEVSALLGR	730.398	1458.78	1458.78	1.65	2	2.31	0	0.95	Delta:H(2)C(2)[+26.01565] (N-term)	2	1	1.76861e+07	1.76861e+07	0	0	0	0	rep2	No
7	Cluster32146	Peptide	FVQAGSEVSALLGR	744.395	1486.78	1486.78	0.67	2	2.31	0	0.95	Formyl[+27.994915] (N-term)	2	2	1.51071e+06	3.37044e+06	0	0	0	0	rep1	No
7	Cluster32146	Peptide	FVQAGSEVSALLGR	681.398	2041.17	2041.17	2.35	3	2.41	0	0.95	iTRAQ8plex[+304.20536] (N-term); iTRAQ8plex[+304.20536] (S9)	2	31	1.26798e+07	1.40394e+08	1.02458	0.163505	21.0521	0.0166749	rep2	Yes
7	Cluster32146	Peptide	FVQAGSEVSALLGR	869.492	1736.97	1432.77	2.09	2	2.31	0	0.95	iTRAQ8plex[+304.20536] (N-term)	2	318	4.31094e+06	2856614268	0.0102685	8.08719	0.634043	4.84678	rep2	Yes
7	Cluster32146	Peptide	FVQAGSEVSALLGR	1021.59	2041.17	2041.17	1.96	2	2.31	0	0.95	iTRAQ8plex[+304.20536] (N-term); iTRAQ8plex[+304.20536] (S6)	2	51	1.17081e+06	2.55346e+08	0.886488	8.40183	0.646713	5.06491	rep2	Yes
7	Cluster32146	Peptide	FVQAGSEVSALLGR	573.994	1718.96	1718.96	1.75	3	2.41	0	0.95	iTRAQ8plex[+304.20536] (N-term); Glu->pyro-Glu[-18.010565] (S6)	2	11	6.64153e+06	8.96863e+07	1.51426	5.40718	68.2395	0.0230242	rep1	Yes
7	Cluster32146	Peptide	FVQAGSEVSALLGR	573.994	1718.96	1718.96	1.75	3	2.41	0	0.95	iTRAQ8plex[+304.20536] (N-term); Glu->pyro-Glu[-18.010565] (E7)	2	3	7.12637e+06	2.31883e+07	0.0109069	0.0413329	10.9075	0.356598	rep1	Yes
7	Cluster32146	Peptide	FVQAGSEVSALLGR	587.324	1758.95	1758.95	1.71	3	2.41	0	0.95	iTRAQ8plex[+304.20536] (N-term); Cation:Na[+21.981943] (E7)	2	11	3.51844e+07	3.26585e+08	1.9188	7.56682	8.9917	2.25541	rep1	Yes
7	Cluster32146	Peptide	GIYPAVDPLDSTSTMLQPR	789.083	2364.23	2060.02	10	3	5.2	7.08	1		2	31	9.20843e+07	1.25458e+09	0	0	0	0	rep2	No
7	Cluster32146	Peptide	GIYPAVDPLDSTSTMLQPR	794.415	2380.22	2076.02	10	3	4.73	6.56	1	Oxidation[+15.994915] (M15)	2	46	6.41551e+07	2.17295e+09	0	0	0	0	rep2	No
7	Cluster32146	Peptide	GIYPAVDPLDSTSTMLQPR	890.485	2668.43	2668.44	2.92	3	2.41	0	0.95	iTRAQ8plex[+304.20536] (N-term); iTRAQ8plex[+304.20536] (S13)	2	1	771319	771319	28.2201	0.23923	0.0192973	4.89183	rep2	Yes
7	Cluster32146	Peptide	GIYPAVDPLDSTSTMLQPR	1335.22	2668.43	2668.44	2.25	2	2.31	0	0.95	iTRAQ8plex[+304.20536] (N-term); iTRAQ8plex[+304.20536] (S11)	2	11	1.02894e+06	2.27276e+08	0.991514	0.180464	0.604874	5.47477	rep2	Yes
7	Cluster32146	Peptide	GIYPAVDPLDSTSTMLQPR	1335.22	2668.43	2668.43	2.25	2	2.31	0	0.95	iTRAQ8plex[+304.20536] (N-term); iTRAQ8plex[+304.20536] (Y3)	2	11	2.27596e+06	1.72161e+08	1.16402	0.147371	0.579247	4.82519	rep2	Yes
7	Cluster32146	Peptide	GIYPAVDPLDSTSTMLQPR	789.083	2364.23	2363.21	0.63	3	2.41	0	0.95	iTRAQ8plex[+304.20536] (N-term)	2	75	1.52737e+07	4.98776e+08	0.122303	0.0501332	42.137	4.56075	rep1	Yes
7	Cluster32146	Peptide	GLAAKGIYPAVDPLDSTSTMLQPR	935.838	2804.5	2500.3	10	3	5.1	3.95	0.99		2	1	1.00577e+07	1.00577e+07	0	0	0	0	rep1	No
7	Cluster32146	Peptide	GLAAKGIYPAVDPLDSTSTMLQPR	778.184	3108.71	2804.5	9.5	4	5.45	3.46	1	iTRAQ8plex[+304.20536] (K5)	2	1	5.83036e+07	5.83036e+07	1.74379	0.0739291	1.08681	3.31995	rep1	Yes
7	Cluster32146	Peptide	GLAAKGIYPAVDPLDSTSTMLQPR	935.838	2804.49	2804.5	2.25	3	2.41	0	0.95	iTRAQ8plex[+304.20536] (N-term); iTRAQ8plex[+304.20536] (K5)	2	1	1.00577e+07	1.00577e+07	0.00666411	4.55748	54.4999	17.7361	rep1	Yes
7	Cluster32146	Peptide	GSITSIQAVYVPADDLTDPAPATTFAHLDATTVLSR	1005.53	4018.09	4018.09	1.99	4	2.61	0	0.95	iTRAQ8plex[+304.20536] (N-term)	2	3	4.27397e+06	1.34864e+07	1.80823	0.185419	0.352099	0.249143	rep1	Yes
7	Cluster32146	Peptide	IVGEEHYETAQQVK	659.681	1976.02	1671.81	10	3	4.94	5.08	1	Acetyl[+42.010565] (K14)	2	3	3.02557e+07	1.47008e+08	0	0	0	0	rep2	No
7	Cluster32146	Peptide	IVGEEHYETAQQVK	1120.11	2238.21	1934.01	10	2	6.31	7.1	1	iTRAQ8plex[+304.20536] (K14)	2	74	1.65458e+07	1670189802	0.920566	0.0319673	0.608888	4.81126	rep2	Yes
7	Cluster32146	Peptide	IVGEEHYETAQQVK	848.476	2542.4	2542.41	2.83	3	2.41	0	0.95	iTRAQ8plex[+304.20536] (N-term); iTRAQ8plex[+304.20536] (K14); iTRAQ8plex[+304.20536] (Y7)	2	3	4.16861e+06	4.5423e+07	1.36673	0.197054	0.339776	240.44	rep1	Yes
7	Cluster32146	Peptide	IVGEEHYETAQQVK	754.403	2260.19	2260.19	2.65	3	2.41	0	0.95	iTRAQ8plex[+304.20536] (N-term); iTRAQ8plex[+304.20536] (K14); Cation:Na[+21.981943] (E8)	2	1	2.47896e+07	2.47896e+07	0.851791	0.067674	64.9829	1.18744	rep2	Yes
7	Cluster32146	Peptide	IVGEEHYETAQQVK	981.018	1960.02	1960.02	2.24	2	2.31	0	0.95	Delta:H(2)C(2)[+26.01565] (N-term); iTRAQ8plex[+304.20536] (K14)	2	2	2.39698e+06	6.79257e+06	0.801061	0.812284	29.9747	4.61025	rep2	Yes
7	Cluster32146	Peptide	IVGEEHYETAQQVK	995.014	1988.01	1988.02	2.11	2	2.31	0	0.95	Formyl[+27.994915] (N-term); Delta:H(2)C(2)[+26.01565] (H6); iTRAQ8plex[+304.20536] (K14)	2	1	1.96045e+06	1.96045e+06	1.05276	0.216446	0.546049	4.8125	rep2	Yes
7	Cluster32146	Peptide	IVGEEHYETAQQVK	1120.11	2238.2	1934.01	2.07	2	2.31	0	0.95	iTRAQ8plex[+304.20536] (N-term); iTRAQ8plex[+304.20536] (K14)	2	150	1.65458e+07	1284095485	0.920568	0.0319674	0.608887	4.81127	rep2	Yes
7	Cluster32146	Peptide	IVGEEHYETAQQVK	751.735	2252.18	2252.19	1.6	3	2.41	0	0.95	iTRAQ8plex[+304.20536] (N-term); iTRAQ8plex[+304.20536] (K14); Pro->pyro-Glu[+13.979265] (H6)	2	1	1.6544e+07	1.6544e+07	0.48293	6.08493	40.9171	1.35013	rep1	Yes
7	Cluster32146	Peptide	MPSAVGYQPTLSTEMGSLQER	868.097	2601.26	2297.07	10	3	4.8	5.46	1	Oxidation[+15.994915] (M15)	2	6	4.49998e+07	5.27524e+08	0	0	0	0	rep1	No
7	Cluster32146	Peptide	MPSAVGYQPTLSTEMGSLQER	1293.64	2585.27	2281.07	10	2	5.86	6.47	1		2	8	2.3292e+07	3.9799e+08	0	0	0	0	rep1	No
7	Cluster32146	Peptide	MPSAVGYQPTLSTEMGSLQER	723.372	2889.46	2889.46	2.21	4	2.61	0	0.95	iTRAQ8plex[+304.20536] (N-term); iTRAQ8plex[+304.20536] (Y7)	2	4	1.63825e+07	5.33288e+07	131.056	10.124	44.7546	31.6892	rep2	Yes
7	Cluster32146	Peptide	MPSAVGYQPTLSTEMGSLQER	862.767	2585.28	2585.27	1.97	3	2.41	0	0.95	iTRAQ8plex[+304.20536] (N-term)	2	9	6.14248e+06	1.56349e+08	1.07385	0.346821	0.605414	0.0898393	rep2	Yes
7	Cluster32146	Peptide	VALVYGQMNEPPGAR	641.341	1921	1616.8	10	3	4.1	6.22	1	Oxidation[+15.994915] (M8)	2	19	4.76845e+07	1.29222e+09	0	0	0	0	rep2	No
7	Cluster32146	Peptide	VALVYGQMNEPPGAR	814.413	1626.81	1626.81	1.48	2	2.31	0	0.95	Delta:H(2)C(2)[+26.01565] (N-term)	2	1	1.24028e+07	1.24028e+07	0	0	0	0	rep2	No
7	Cluster32146	Peptide	VALVYGQMNEPPGAR	953.507	1905	1600.8	10	2	5.48	5.4	0.99		2	32	8.53126e+06	1.34837e+09	0	0	0	0	rep2	No
7	Cluster32146	Peptide	VALVYGQMNEPPGAR	1105.61	2209.21	2209.21	1.81	2	2.31	0	0.95	iTRAQ8plex[+304.20536] (N-term); iTRAQ8plex[+304.20536] (Y5)	2	8	739051	8.25754e+07	1.261	4.92885	0.31549	2.43791	rep1	Yes
7	Cluster32146	Peptide	VALVYGQMNEPPGAR	953.506	1905	1905	1.78	2	2.31	0	0.95	iTRAQ8plex[+304.20536] (N-term)	2	45	660196	4.34722e+08	1.16127	7.76827	0.592373	4.79928	rep2	Yes
7	Cluster32146	Peptide	VALVYGQMNEPPGAR	954	1905.99	1905.99	1.26	2	2.31	0	0.95	iTRAQ8plex[+304.20536] (N-term); Deamidated[+0.984016] (N9)	2	1	5.91193e+06	5.91193e+06	0.0244551	0.086941	24.2756	9.45231	rep2	Yes
7	Cluster32146	Peptide	VGLTALTMAEYFR	597.991	1790.95	1486.75	10	3	3.77	4.07	0.99	Oxidation[+15.994915] (M8)	2	18	1.3175e+07	8.29222e+08	0	0	0	0	rep2	No
7	Cluster32146	Peptide	VGLTALTMAEYFR	749.395	1496.77	1496.78	1.87	2	2.31	0	0.95	Delta:H(2)C(2)[+26.01565] (N-term)	2	1	1.09544e+07	1.09544e+07	0	0	0	0	rep2	No
7	Cluster32146	Peptide	VGLTALTMAEYFR	786.391	1570.77	1570.77	0	2	2.31	0	0.95	Carbamyl[+43.005814] (N-term)	2	1	7.13316e+06	7.13316e+06	0	0	0	0	rep1	No
7	Cluster32146	Peptide	VGLTALTMAEYFR	888.485	1774.96	1470.75	10	2	5.35	5.28	0.99		2	28	2.13836e+07	1.05205e+09	0	0	0	0	rep2	No
7	Cluster32146	Peptide	VGLTALTMAEYFR	694.061	2079.16	2079.16	2.45	3	2.41	0	0.95	iTRAQ8plex[+304.20536] (N-term); iTRAQ8plex[+304.20536] (Y11)	2	3	5.17909e+06	1.34925e+07	0.882361	0.0607208	0.636833	0.163655	rep2	Yes
7	Cluster32146	Peptide	VGLTALTMAEYFR	888.486	1774.96	1510.79	2.38	2	2.31	0	0.95	iTRAQ8plex[+304.20536] (N-term)	2	51	2.36359e+07	5.09071e+08	1.8997	0.0167283	0.413873	0.00553942	rep1	Yes
7	Cluster32146	Peptide	VGLTALTMAEYFR	901.494	1800.97	1800.98	1.89	2	2.31	0	0.95	Delta:H(2)C(2)[+26.01565] (N-term); iTRAQ8plex[+304.20536] (Y11)	2	1	1.26766e+06	1.26766e+06	1.10309	0.311174	0.628839	0.178968	rep2	Yes
7	Cluster32146	Peptide	VGLTALTMAEYFR	586.655	1756.94	1756.94	1.71	3	2.41	0	0.95	iTRAQ8plex[+304.20536] (N-term); Glu->pyro-Glu[-18.010565] (T7)	2	4	4706783	2.14806e+07	1.50711	19.0075	43.3502	74.4449	rep1	Yes
7	Cluster32146	Peptide	YKELQDIIAILGLDELSEEDR	931.499	2791.47	2791.48	1.72	3	2.41	0	0.95	Delta:H(2)C(2)[+26.01565] (N-term); iTRAQ8plex[+304.20536] (K2)	2	1	4.38778e+06	4.38778e+06	1.20239	0.193562	29.7696	0.519191	rep2	Yes
7	Cluster32146	Peptide	YKELQDIIAILGLDELSEEDR	940.83	2819.47	2819.47	1.7	3	2.41	0	0.95	iTRAQ8plex[+304.20536] (N-term); iTRAQ8plex[+304.20536] (K2)	2	1	8.95489e+06	8.95489e+06	1.0104	0.139567	0.657177	0.426096	rep2	Yes
7	Cluster32146	Peptide	YVGLAETIR	543.997	1628.97	1628.97	2.03	3	2.41	0	0.95	iTRAQ8plex[+304.20536] (N-term); iTRAQ8plex[+304.20536] (Y1)	2	1	2.54477e+07	2.54477e+07	1.66841	2.95069	0.26331	2.19097	rep1	Yes
8	Cluster16711	Peptide	AMHAVIDR	608.841	1215.67	911.465	10	2	3.18	3.13	0.95		2	14	1.31764e+07	3.35064e+08	0	0	0	0	rep2	No
8	Cluster16711	Peptide	AMHAVIDR	608.841	1215.67	1215.67	2.47	2	2.31	0	0.95	iTRAQ8plex[+304.20536] (N-term)	2	18	1.31764e+07	1.91608e+08	0.617278	6.31152	13.9226	235.56	rep2	Yes
8	Cluster16711	Peptide	ASVGFK	608.877	1215.74	911.538	10	2	2.97	4.96	0.99	iTRAQ8plex[+304.20536] (K6)	2	41	1479837376	10321379086	1.09899	6.55339	0.423112	0.0801223	rep2	Yes
8	Cluster16711	Peptide	ASVGFK	608.876	1215.74	911.536	4.17	2	2.31	0	0.95	iTRAQ8plex[+304.20536] (N-term); iTRAQ8plex[+304.20536] (K6)	2	116	1.91152e+06	9.12985e+08	1.10042	0.124292	20.2408	0.0620786	rep2	Yes
8	Cluster16711	Peptide	DDENVNSQPFMR	739.321	1476.63	1476.63	0.81	2	2.31	0	0.95	Delta:H(2)C(2)[+26.01565] (N-term)	2	3	1.43974e+07	4.58561e+07	0	0	0	0	rep1	No
8	Cluster16711	Peptide	DDENVNSQPFMR	878.417	1754.82	1450.61	10	2	5.13	4.92	0.99		2	6	2.54457e+07	6.91998e+08	0	0	0	0	rep2	No
8	Cluster16711	Peptide	DDENVNSQPFMR	886.415	1770.81	1466.61	10	2	3.22	2.71	0.95	Oxidation[+15.994915] (M11)	2	8	1.01107e+07	9.40524e+08	0	0	0	0	rep2	No
8	Cluster16711	Peptide	DDENVNSQPFMR	687.347	2059.02	2059.02	2.48	3	2.41	0	0.95	iTRAQ8plex[+304.20536] (N-term); iTRAQ8plex[+304.20536] (S7)	2	1	2.17151e+07	2.17151e+07	1.43598	0.071987	0.496669	2.5154	rep2	Yes
8	Cluster16711	Peptide	DDENVNSQPFMR	878.909	1755.8	1755.8	1.37	2	2.31	0	0.95	iTRAQ8plex[+304.20536] (N-term); Deamidated[+0.984016] (N6)	2	2	1.01136e+07	1.2038e+07	1.1098	0.5357	0.514207	2.98935	rep2	Yes
8	Cluster16711	Peptide	DNGLLLHIHR	497.961	1490.86	1186.66	10	3	3.58	4.44	1		2	6	3.37338e+07	1.4322e+08	0	0	0	0	rep1	No
8	Cluster16711	Peptide	DNGLLLHIHR	607.837	1213.66	1213.66	2.47	2	2.31	0	0.95	Delta:H(2)C(2)[+26.01565] (N-term); Deamidated[+0.984016] (N2)	2	6	1.04717e+07	7.04556e+07	0	0	0	0	rep2	No
8	Cluster16711	Peptide	DNGLLLHIHR	644.835	1287.65	1287.66	1.55	2	2.31	0	0.95	Carbamyl[+43.005814] (N-term)	2	1	2.9801e+07	2.9801e+07	0	0	0	0	rep1	No
8	Cluster16711	Peptide	DNGLLLHIHR	746.929	1491.84	1187.65	4.72	2	2.31	0	0.95	iTRAQ8plex[+304.20536] (N-term); Deamidated[+0.984016] (N2)	2	16	4.52822e+06	3.03472e+08	0.0139772	0.324191	0.712799	2.98139	rep2	Yes
8	Cluster16711	Peptide	DNGLLLHIHR	746.435	1490.86	1468.83	2.59	2	2.31	0	0.95	iTRAQ8plex[+304.20536] (N-term)	2	4	8.21562e+06	5.46343e+07	66.6819	2.98615	23.4465	132.583	rep1	Yes
8	Cluster16711	Peptide	DNGLLLHIHR	390.884	1169.63	1169.63	2.05	3	2.41	0	0.95	iTRAQ8plex[+304.20536] (N-term); Gln->pyro-Glu[-17.026549] (N2)	2	1	1.92267e+07	1.92267e+07	0.0477082	0.464337	0.00523781	6.49812	rep2	Yes
8	Cluster16711	Peptide	EMTLGFVDLLR	668.353	1334.69	1334.69	1.65	2	2.31	0	0.95	Acetyl[+42.010565] (N-term)	2	1	8.94353e+06	8.94353e+06	0	0	0	0	rep2	No
8	Cluster16711	Peptide	EMTLGFVDLLR	677.357	1352.7	1352.7	1.77	2	2.31	0	0.95	Formyl[+27.994915] (N-term); Dioxidation[+31.989829] (M2)	2	2	1.02849e+07	2.66668e+07	0	0	0	0	rep2	No
8	Cluster16711	Peptide	EMTLGFVDLLR	778.434	1554.85	1554.86	2.57	2	2.31	0	0.95	iTRAQ8plex[+304.20536] (N-term)	2	1	6.88075e+06	6.88075e+06	0.0247788	0.579011	0.569198	32.0329	rep2	Yes
8	Cluster16711	Peptide	EMTLGFVDLLR	801.432	1600.85	1600.85	1.5	2	2.31	0	0.95	iTRAQ8plex[+304.20536] (N-term); Cation:Na[+21.981943] (E1); Glu->pyro-Glu[-18.010565] (T3)	2	1	1.81563e+07	1.81563e+07	0.0448967	0.222191	0.640887	41.345	rep2	Yes
8	Cluster16711	Peptide	GGLDFTK	673.399	1344.78	1040.58	10	2	3.27	3.91	0.95	iTRAQ8plex[+304.20536] (K7)	2	11	2.51792e+07	1725945834	1.2194	0.149283	33.0348	1.02	rep2	Yes
8	Cluster16711	Peptide	GGLDFTK	673.397	1344.78	1344.78	2.68	2	2.31	0	0.95	iTRAQ8plex[+304.20536] (N-term); iTRAQ8plex[+304.20536] (K7)	2	8	1.56576e+07	1.24743e+08	0.983863	0.179585	0.512204	0.0466578	rep2	Yes
8	Cluster16711	Peptide	GGLDFTKDDENVNSQPFMR	825.401	2473.18	2168.98	10	3	4.57	2.37	0.95		2	1	4.84463e+07	4.84463e+07	0	0	0	0	rep1	No
8	Cluster16711	Peptide	GGLDFTKDDENVNSQPFMR	926.802	2777.38	2473.18	10	3	5.91	6.69	1	iTRAQ8plex[+304.20536] (K7)	2	19	1.78488e+07	2.42635e+08	1.10331	0.0813125	0.460332	0.155449	rep2	Yes
8	Cluster16711	Peptide	GGLDFTKDDENVNSQPFMR	771.403	3081.58	3081.57	2.6	4	2.61	0	0.95	iTRAQ8plex[+304.20536] (N-term); iTRAQ8plex[+304.20536] (K7); iTRAQ8plex[+304.20536] (S14)	2	3	1.18897e+07	5.06487e+07	1.02517	0.139702	39.9122	0.152812	rep2	Yes
8	Cluster16711	Peptide	GGLDFTKDDENVNSQPFMR	926.128	2775.36	2775.37	2.27	3	2.41	0	0.95	iTRAQ8plex[+304.20536] (N-term); iTRAQ8plex[+304.20536] (K7); Dethiomethyl[-48.003371] (M18)	2	1	4.04001e+06	4.04001e+06	1.30776	0.118853	0.475819	5.31832	rep2	Yes
8	Cluster16711	Peptide	GGLDFTKDDENVNSQPFMR	1389.7	2777.39	2473.18	1.62	2	2.31	0	0.95	iTRAQ8plex[+304.20536] (N-term); iTRAQ8plex[+304.20536] (K7)	2	45	3.28868e+06	451947123	1.07397	0.141181	0.426228	0.208237	rep2	Yes
8	Cluster16711	Peptide	GHYLNATAGTCEEMIK	810.05	2427.13	2427.13	2.72	3	2.41	0	0.95	iTRAQ8plex[+304.20536] (N-term); iTRAQ8plex[+304.20536] (K16); Methylthio (C11)	2	1	5.23561e+06	5.23561e+06	1.43312	0.0741426	44.1053	481.754	rep2	Yes
8	Cluster16711	Peptide	LEGEREMTLGFVDLLR	937.486	1872.96	1872.96	2.56	2	2.31	0	0.95	Carbamyl[+43.005814] (N-term); Deamidated[+0.984016] (R5); Dethiomethyl[-48.003371] (M7)	2	1	4.49865e+06	4.49865e+06	0	0	0	0	rep2	No
8	Cluster16711	Peptide	LEGEREMTLGFVDLLR	606.979	1817.91	1817.92	2.81	3	2.41	0	0.95	iTRAQ8plex[+304.20536] (N-term)	2	2	2.66765e+06	5.41591e+06	0.960481	0.244457	0.640282	2.56725	rep2	Yes
8	Cluster16711	Peptide	LGLSAK	750.99	1499.96	1499.97	3.07	2	2.31	0	0.95	iTRAQ8plex[+304.20536] (N-term); iTRAQ8plex[+304.20536] (K6); iTRAQ8plex[+304.20536] (S4)	2	1	9.51881e+06	9.51881e+06	123.969	0.0674587	32.1705	174.122	rep1	Yes
8	Cluster16711	Peptide	LGLSAKNYGR	461.607	1381.79	1077.59	10	3	3.24	2.98	0.95		2	2	3.18578e+07	4.00115e+07	0	0	0	0	rep2	No
8	Cluster16711	Peptide	LGLSAKNYGR	461.606	1381.79	1381.8	3.26	3	2.41	0	0.95	iTRAQ8plex[+304.20536] (N-term); iTRAQ8plex[+304.20536] (K6)	2	2	3.55889e+07	6.74467e+07	85.5512	0.218524	0.589643	11.7498	rep2	Yes
8	Cluster16711	Peptide	NHGMHFR	406.874	1217.6	913.398	10	3	2.42	2.4	0.95	Oxidation[+15.994915] (M4)	2	1	3.10953e+06	3.10953e+06	0	0	0	0	rep2	No
8	Cluster16711	Peptide	NHGMHFR	602.302	1202.59	1202.59	2.66	2	2.31	0	0.95	iTRAQ8plex[+304.20536] (N-term); Deamidated[+0.984016] (N1)	2	1	1.21596e+07	1.21596e+07	1.28262	3.31594	20.6178	47.2274	rep1	Yes
8	Cluster16711	Peptide	SPQTETKASVGFKAGVKEESSTGTWTTVWTDGLTSLDR	1177.86	4707.4	4707.41	0.85	4	2.61	0	0.95	Acetyl[+42.010565] (N-term); iTRAQ8plex[+304.20536] (K7); iTRAQ8plex[+304.20536] (K13); iTRAQ8plex[+304.20536] (K17)	2	1	677262	677262	1.85589	5.62373	0.720256	5.37971	rep2	Yes
8	Cluster16711	Peptide	SQAETGEIK	785.947	1569.88	1265.68	9.5	2	4.09	5.46	1	iTRAQ8plex[+304.20536] (K9)	2	47	6.01988e+07	3254917741	0.640194	6.57357	1.28376	8.31036	rep1	Yes
8	Cluster16711	Peptide	SQAETGEIK	533.311	1596.91	1596.91	3.38	3	2.41	0	0.95	iTRAQ8plex[+304.20536] (N-term); iTRAQ8plex[+304.20536] (K9); Deamidated[+0.984016] (Q2)	2	1	2.0702e+07	2.0702e+07	1.18565	0.0930657	21.7943	194.072	rep2	Yes
8	Cluster16711	Peptide	SQAETGEIK	625.7	1874.08	1874.08	3.04	3	2.41	0	0.95	iTRAQ8plex[+304.20536] (N-term); iTRAQ8plex[+304.20536] (K9); iTRAQ8plex[+304.20536] (S1)	2	2	1.69992e+07	2.88826e+07	89.9913	0.219405	0.528988	555.874	rep2	Yes
8	Cluster16711	Peptide	SQAETGEIK	776.941	1551.87	1551.87	2.71	2	2.31	0	0.95	iTRAQ8plex[+304.20536] (N-term); iTRAQ8plex[+304.20536] (K9); Glu->pyro-Glu[-18.010565] (E7)	2	1	1.48684e+07	1.48684e+07	1.47638	0.125463	0.464423	1.95801	rep2	Yes
8	Cluster16711	Peptide	SQAETGEIK	796.934	1591.85	1591.86	2.64	2	2.31	0	0.95	iTRAQ8plex[+304.20536] (N-term); iTRAQ8plex[+304.20536] (K9); Cation:Na[+21.981943] (E7)	2	2	9.17142e+06	4.02944e+07	1.09331	0.155758	0.481913	6.65964	rep2	Yes
8	Cluster16711	Peptide	SQAETGEIK	785.946	1569.88	1595.89	2.63	2	2.31	0	0.95	iTRAQ8plex[+304.20536] (N-term); iTRAQ8plex[+304.20536] (K9)	2	41	1.28926e+07	2.53396e+08	0.0102147	0.206395	0.478309	2.61494	rep2	Yes
8	Cluster16711	Peptide	SQAETGEIK	776.941	1551.87	1551.87	2.58	2	2.31	0	0.95	iTRAQ8plex[+304.20536] (N-term); iTRAQ8plex[+304.20536] (K9); Glu->pyro-Glu[-18.010565] (S1)	2	1	1.03869e+07	1.03869e+07	124.411	0.254108	0.514953	413.335	rep2	Yes
8	Cluster16711	Peptide	SQAETGEIK	646.852	1291.69	1291.69	1.55	2	2.31	0	0.95	Delta:H(2)C(2)[+26.01565] (N-term); iTRAQ8plex[+304.20536] (K9)	2	1	1.89658e+07	1.89658e+07	7.00548	3.81163	22.2573	132.219	rep1	Yes
8	Cluster16711	Peptide	TFQGPPHGIQVER	590.657	1768.95	1464.75	10	3	6.18	8.17	1		2	181	6200200	9.90754e+09	0	0	0	0	rep1	No
8	Cluster16711	Peptide	TFQGPPHGIQVER	746.37	1490.72	1563.78	2.56	2	2.31	0	0.95	Acetyl[+42.010565] (N-term)	2	2	5.39598e+06	2.80108e+07	0	0	0	0	rep2	No
8	Cluster16711	Peptide	TFQGPPHGIQVER	746.387	1490.76	1490.76	1.61	2	2.31	0	0.95	Delta:H(2)C(2)[+26.01565] (N-term)	2	4	2.4913e+07	6.28759e+07	0	0	0	0	rep1	No
8	Cluster16711	Peptide	TFQGPPHGIQVER	747.377	1492.74	1492.74	3.08	2	2.31	0	0.95	Formyl[+27.994915] (N-term)	2	1	4.99478e+06	4.99478e+06	0	0	0	0	rep2	No
8	Cluster16711	Peptide	TFQGPPHGIQVER	885.482	1768.95	1746.91	2.98	2	2.31	0	0.95	iTRAQ8plex[+304.20536] (N-term)	2	434	1.95648e+07	4627299947	1.20781	0.0467589	0.436767	0.0587088	rep2	Yes
8	Cluster16711	Peptide	TFQGPPHGIQVER	892.491	1782.97	1782.97	2.92	2	2.31	0	0.95	iTRAQ8plex[+304.20536] (N-term); Pro->pyro-Glu[+13.979265] (T1)	2	2	1.7013e+06	2.97006e+07	21.4564	0.21545	21.6617	4.95762	rep2	Yes
8	Cluster16711	Peptide	TFQGPPHGIQVER	892.472	1782.93	1782.93	2.69	2	2.31	0	0.95	iTRAQ8plex[+304.20536] (N-term); Pro->pyro-Glu[+13.979265] (P6)	2	7	2.11148e+06	8.25355e+07	68.5309	20.6981	0.537568	6.09493	rep2	Yes
8	Cluster16711	Peptide	TFQGPPHGIQVER	595.316	1782.93	1782.93	2.52	3	2.41	0	0.95	iTRAQ8plex[+304.20536] (N-term); Pro->pyro-Glu[+13.979265] (P5)	2	2	2.50286e+07	5.60077e+07	1.01911	5.2282	33.4074	3.20869	rep2	Yes
8	Cluster16711	Peptide	TFQGPPHGIQVER	584.653	1750.94	1750.94	2.4	3	2.41	0	0.95	iTRAQ8plex[+304.20536] (N-term); Glu->pyro-Glu[-18.010565] (E12)	2	2	2.96373e+07	5.79404e+07	1.29727	3.81882	40.1576	1.65379	rep2	Yes
8	Cluster16711	Peptide	TFQGPPHGIQVER	753.376	1504.74	1504.74	2.13	2	2.31	0	0.95	iTRAQ8plex[+304.20536] (N-term); Deamidated[+0.984016] (Q3)	2	15	9.32491e+06	2.29207e+08	0.0108926	0.165608	39.1623	7.51193	rep2	Yes
8	Cluster16711	Peptide	TFQGPPHGIQVER	863.955	1725.89	1725.9	1.74	2	2.31	0	0.95	iTRAQ8plex[+304.20536] (N-term); Arg->GluSA[-43.053433] (R13)	2	1	9.28404e+06	9.28404e+06	182.987	13.4674	39.3278	0.0331843	rep1	Yes
8	Cluster16711	Peptide	VALEACVQAR	566.286	1130.56	1130.56	1.95	2	2.31	0	0.95	Delta:H(2)C(2)[+26.01565] (N-term); Methylthio (C6)	2	6	8.63295e+06	2.17625e+07	0	0	0	0	rep2	No
8	Cluster16711	Peptide	VALEACVQAR	477.915	1430.72	1430.73	3.56	3	2.41	0	0.95	iTRAQ8plex[+304.20536] (N-term); Cation:Na[+21.981943] (E4); Methylthio (C6)	2	1	1.37291e+07	1.37291e+07	1.14033	0.111749	0.599218	0.598277	rep2	Yes
8	Cluster16711	Peptide	VALEACVQAR	705.379	1408.74	1104.54	3.26	2	2.31	0	0.95	iTRAQ8plex[+304.20536] (N-term); Methylthio (C6)	2	270	6.90209e+06	3734043015	1.23126	6.7521	0.526196	0.0449419	rep2	Yes
8	Cluster16711	Peptide	VLAKALR	358.913	1073.72	769.517	10	3	2.6	3.22	0.95		2	3	1.74617e+07	3.6292e+07	0	0	0	0	rep1	No
8	Cluster16711	Peptide	VLAKALR	460.315	1377.92	1377.93	3.7	3	2.41	0	0.95	iTRAQ8plex[+304.20536] (N-term); iTRAQ8plex[+304.20536] (K4)	2	1	2.02793e+07	2.02793e+07	0.0190601	0.0629128	24.8475	3.05712	rep1	Yes
8	Cluster16711	Peptide	WSPELAAACEVWK	1032.57	2063.12	2063.13	2.91	2	2.31	0	0.95	iTRAQ8plex[+304.20536] (N-term); iTRAQ8plex[+304.20536] (K13); Methylthio (C9); Glu->pyro-Glu[-18.010565] (E10)	2	3	5.40538e+06	5.70029e+07	1.30125	0.0414996	0.484986	0.0617724	rep2	Yes
8	Cluster16711	Peptide	WSPELAAACEVWK	716.706	2147.09	2147.1	2.38	3	2.41	0	0.95	iTRAQ8plex[+304.20536] (N-term); iTRAQ8plex[+304.20536] (K13); Trp->Kynurenin[+3.994915] (W1); Methylthio (C9)	2	2	1.87806e+07	3.7046e+07	1.81328	4.91252	29.2558	45.2107	rep1	Yes
8	Cluster16711	Peptide	WSPELAAACEVWK	716.705	2147.09	2147.1	2.24	3	2.41	0	0.95	iTRAQ8plex[+304.20536] (N-term); iTRAQ8plex[+304.20536] (K13); Methylthio (C9); Trp->Kynurenin[+3.994915] (W12)	2	2	1.91288e+07	4.09076e+07	492.02	0.0168168	99.352	3.38534	rep1	Yes
8	Cluster16711	Peptide	WSPELAAACEVWK	722.7	2165.08	2165.08	2.22	3	2.41	0	0.95	iTRAQ8plex[+304.20536] (N-term); iTRAQ8plex[+304.20536] (K13); Methylthio (C9); Cation:Na[+21.981943] (E10)	2	1	1.91554e+07	1.91554e+07	0.943282	5.33377	0.43486	3.87674	rep1	Yes
8	Cluster16711	Peptide	WSPELAAACEVWK	1072.56	2143.1	2097.12	1.91	2	2.31	0	0.95	iTRAQ8plex[+304.20536] (N-term); iTRAQ8plex[+304.20536] (K13); Methylthio (C9)	2	103	2.47787e+07	1362238183	2.64947	3.99334	0.775153	5.88803	rep1	Yes
8	Cluster16711	Peptide	YGRPLLGCTIKPK	709.418	2125.23	2125.24	3.25	3	2.41	0	0.95	Delta:H(2)C(2)[+26.01565] (N-term); Methylthio (C8); iTRAQ8plex[+304.20536] (K11); iTRAQ8plex[+304.20536] (K13)	2	2	1.12841e+07	2.04848e+07	1.44783	0.152311	0.330994	0.0319344	rep1	Yes
9	Cluster12089	Peptide	CALVYGQMNEPPGAR	978.475	1954.93	1954.94	1.84	2	2.31	0	0.95	iTRAQ8plex[+304.20536] (N-term); Methylthio (C1)	2	2	6.85375e+06	3.28097e+07	1.2096	8.48044	0.537736	10.3261	rep2	Yes
9	Cluster12089	Peptide	DAEGQDVLLFIDNIFR	1085.08	2168.14	1863.94	10	2	6.37	6.61	1		2	12	1.62146e+07	2.0122e+08	0	0	0	0	rep1	No
9	Cluster12089	Peptide	DAEGQDVLLFIDNIFR	1085.08	2168.14	2168.14	0.92	2	2.31	0	0.95	iTRAQ8plex[+304.20536] (N-term)	2	9	8.62571e+06	5.21803e+07	1.08238	0.0986916	0.609811	0.451731	rep2	Yes
9	Cluster12089	Peptide	DAPALVDLATGQEILATGIK	1302.75	2603.49	2299.29	9.5	2	6.31	8.32	1	iTRAQ8plex[+304.20536] (K20)	2	5	7.50566e+06	203035693	1.39491	0.125571	86.3382	2.7762	rep1	Yes
9	Cluster12089	Peptide	DAPALVDLATGQEILATGIK	1302.76	2603.5	2603.49	1.54	2	2.31	0	0.95	iTRAQ8plex[+304.20536] (N-term); iTRAQ8plex[+304.20536] (K20)	2	6	1.04324e+07	7.4134e+07	4.53926	0.0819195	105.388	2.77618	rep1	Yes
9	Cluster12089	Peptide	DAPALVDLATGQEILATGIK	1177.66	2353.3	2353.3	0	2	2.31	0	0.95	Formyl[+27.994915] (N-term); iTRAQ8plex[+304.20536] (K20)	2	3	656414	9.26365e+06	1.25471	3.9226	0.263029	2.0401	rep1	Yes
9	Cluster12089	Peptide	DAPALVDLATGQEILATGIK	1163.66	2325.31	2325.3	0	2	2.31	0	0.95	Delta:H(2)C(2)[+26.01565] (N-term); iTRAQ8plex[+304.20536] (K20)	2	15	800443	7.89101e+07	1.34701	4.52437	0.250802	2.15137	rep1	Yes
9	Cluster12089	Peptide	EGNDLYR	585.806	1169.6	1169.59	2.39	2	2.31	0	0.95	iTRAQ8plex[+304.20536] (N-term)	2	1	1.21208e+07	1.21208e+07	0.7064	3.67835	0.143694	0.58864	rep2	Yes
9	Cluster12089	Peptide	EGNDLYR	586.301	1170.59	1170.58	1.71	2	2.31	0	0.95	iTRAQ8plex[+304.20536] (N-term); Deamidated[+0.984016] (N3)	2	3	2.48071e+07	6.27749e+07	0.715665	5.43169	26.0564	1.80358	rep2	Yes
9	Cluster12089	Peptide	ENINSFQGLLDGK	1022.07	2042.12	1737.92	10	2	5.76	6.97	1	iTRAQ8plex[+304.20536] (K13)	2	4	7.23444e+06	2.01966e+08	0.838222	0.0581443	0.568768	0.101598	rep2	Yes
9	Cluster12089	Peptide	ENINSFQGLLDGK	1022.07	2042.12	2042.13	2.94	2	2.31	0	0.95	iTRAQ8plex[+304.20536] (N-term); iTRAQ8plex[+304.20536] (K13)	2	1	7.23444e+06	7.23444e+06	0.83822	0.0581441	0.568766	0.101598	rep2	Yes
9	Cluster12089	Peptide	ENINSFQGLLDGK	587.589	2346.32	2346.33	2.39	4	2.61	0	0.95	iTRAQ8plex[+304.20536] (N-term); iTRAQ8plex[+304.20536] (K13); iTRAQ8plex[+304.20536] (S5)	2	1	2.0458e+07	2.0458e+07	1.138	0.123623	39.5998	0.0195919	rep2	Yes
9	Cluster12089	Peptide	ENINSFQGLLDGK	1022.56	2043.1	2043.1	1.96	2	2.31	0	0.95	iTRAQ8plex[+304.20536] (N-term); iTRAQ8plex[+304.20536] (K13); Deamidated[+0.984016] (N4)	2	1	6.78389e+06	6.78389e+06	0.0102427	0.141069	0.650759	0.101332	rep2	Yes
9	Cluster12089	Peptide	FEDQEGLPPIMTSLEVQDHPTR	948.477	2842.41	2538.21	10	3	5.93	7.18	1		2	3	2.06372e+07	4.04519e+07	0	0	0	0	rep1	No
9	Cluster12089	Peptide	FEDQEGLPPIMTSLEVQDHPTR	953.809	2858.4	2554.2	10	3	5.4	6.11	1	Oxidation[+15.994915] (M11)	2	2	3.31938e+07	5.72668e+07	0	0	0	0	rep1	No
9	Cluster12089	Peptide	FEDQEGLPPIMTSLEVQDHPTR	948.474	2842.4	2842.41	2.64	3	2.41	0	0.95	iTRAQ8plex[+304.20536] (N-term)	2	2	1.07903e+07	1.98147e+07	0.0321349	7.24249	0.687244	0.250959	rep2	Yes
9	Cluster12089	Peptide	FEDQEGLPPIMTSLEVQDHPTR	787.66	3146.61	3146.62	2.42	4	2.61	0	0.95	iTRAQ8plex[+304.20536] (N-term); iTRAQ8plex[+304.20536] (T21)	2	3	1.84138e+07	2.13314e+07	0.0145959	0.104052	45.8025	0.195677	rep2	Yes
9	Cluster12089	Peptide	FTQANSEVSALLGR	898.992	1795.97	1491.77	10	2	5.01	4.97	0.99		2	2	1.58382e+07	2.97027e+07	0	0	0	0	rep2	No
9	Cluster12089	Peptide	FTQANSEVSALLGR	701.393	2101.15	2101.16	2.86	3	2.41	0	0.95	iTRAQ8plex[+304.20536] (N-term); iTRAQ8plex[+304.20536] (S6); Deamidated[+0.984016] (N5)	2	1	1.47621e+07	1.47621e+07	0.016582	0.186645	0.596227	0.28941	rep2	Yes
9	Cluster12089	Peptide	FTQANSEVSALLGR	701.063	2100.17	2100.17	2.43	3	2.41	0	0.95	iTRAQ8plex[+304.20536] (N-term); iTRAQ8plex[+304.20536] (S6)	2	2	1.41643e+07	2.74377e+07	1.20232	0.216825	55.4489	37.5179	rep2	Yes
9	Cluster12089	Peptide	FTQANSEVSALLGR	579.988	1736.94	1736.95	2.42	3	2.41	0	0.95	iTRAQ8plex[+304.20536] (N-term); Glu->pyro-Glu[-18.010565] (T2)	2	1	1.67303e+06	1.67303e+06	1.21611	0.28732	17.706	34.6163	rep2	Yes
9	Cluster12089	Peptide	FTQANSEVSALLGR	898.992	1795.97	1795.97	1.78	2	2.31	0	0.95	iTRAQ8plex[+304.20536] (N-term)	2	2	1.58382e+07	2.97027e+07	0.0116514	0.153052	0.652451	0.139627	rep2	Yes
9	Cluster12089	Peptide	FTQANSEVSALLGR	899.485	1796.96	1796.95	1.34	2	2.31	0	0.95	iTRAQ8plex[+304.20536] (N-term); Deamidated[+0.984016] (N5)	2	6	1.61968e+07	6.6242e+07	0.951585	5.66653	0.36041	1.21874	rep1	Yes
9	Cluster12089	Peptide	GGKIGLFGGAGVGK	768.431	1534.85	1534.83	0.65	2	2.31	0	0.95	Formyl[+27.994915] (N-term); iTRAQ8plex[+304.20536] (K3); iTRAQ8plex[+304.20536] (K14)	2	3	2.669e+06	1.11079e+07	0.0510494	0.16451	0.0115068	4.99892	rep1	Yes
9	Cluster12089	Peptide	IGLFGGAGVGK	640.388	1278.75	974.555	10	2	2.78	2.6	0.95		2	1	9.29056e+06	9.29056e+06	0	0	0	0	rep2	No
9	Cluster12089	Peptide	IGLFGGAGVGK	792.487	1582.96	1278.76	10	2	4.66	5.91	1	iTRAQ8plex[+304.20536] (K11)	2	70	5.27961e+08	8630598948	1.06433	6.46268	0.606931	0.00588259	rep2	Yes
9	Cluster12089	Peptide	IGLFGGAGVGK	792.482	1582.95	1608.98	2.61	2	2.31	0	0.95	iTRAQ8plex[+304.20536] (N-term); iTRAQ8plex[+304.20536] (K11)	2	95	1.27314e+07	7.17669e+08	1.11823	0.169074	0.642767	22.4443	rep2	Yes
9	Cluster12089	Peptide	IMNVLGEPIDER	845.458	1688.9	1384.7	10	2	5.07	5.79	1		2	4	3.07694e+07	2.58274e+08	0	0	0	0	rep2	No
9	Cluster12089	Peptide	IMNVLGEPIDER	853.457	1704.9	1400.7	10	2	3.4	4.11	0.95	Oxidation[+15.994915] (M2)	2	5	2.7486e+07	2.29439e+08	0	0	0	0	rep2	No
9	Cluster12089	Peptide	IMNVLGEPIDER	693.359	1384.7	1384.7	1.73	2	2.31	0	0.95	iTRAQ8plex[+304.20536] (N-term)	2	1	1.92769e+07	1.92769e+07	0.0208042	0.117304	112.562	60.8188	rep2	Yes
9	Cluster12089	Peptide	IPSAVGYQPTLASDLGALQER	830.791	2489.35	2185.14	10	3	4.62	6.01	1		2	4	4.73603e+07	2.72564e+08	0	0	0	0	rep2	No
9	Cluster12089	Peptide	IPSAVGYQPTLASDLGALQER	932.188	2793.54	2793.55	2.04	3	2.41	0	0.95	iTRAQ8plex[+304.20536] (N-term); iTRAQ8plex[+304.20536] (Y7)	2	1	2.08068e+07	2.08068e+07	1.64395	1.01988	0.552351	1.59905	rep1	Yes
9	Cluster12089	Peptide	IPSAVGYQPTLASDLGALQER	932.19	2793.55	2793.55	1.93	3	2.41	0	0.95	iTRAQ8plex[+304.20536] (N-term); iTRAQ8plex[+304.20536] (S3)	2	1	1.07457e+07	1.07457e+07	0.0121517	0.167423	0.569473	0.0724686	rep2	Yes
9	Cluster12089	Peptide	IPSAVGYQPTLASDLGALQER	1245.68	2489.34	2489.35	0.8	2	2.31	0	0.95	iTRAQ8plex[+304.20536] (N-term)	2	3	8.29195e+06	3.02222e+07	0.0314675	0.0490947	0.545083	0.0267647	rep2	Yes
9	Cluster12089	Peptide	NLQDIIAILGMDELSEDDK	914.156	2739.45	2435.24	10	3	5.4	5.42	1	iTRAQ8plex[+304.20536] (K19)	2	2	1.6849e+07	4.32599e+07	0.0170233	0.0634957	0.564865	0.217634	rep2	Yes
9	Cluster12089	Peptide	NLQDIIAILGMDELSEDDK	914.156	2739.45	2739.45	1.31	3	2.41	0	0.95	iTRAQ8plex[+304.20536] (N-term); iTRAQ8plex[+304.20536] (K19)	2	2	1.6849e+07	4.32599e+07	0.0170233	0.063496	0.564864	0.217634	rep2	Yes
9	Cluster12089	Peptide	NLQDIIAILGMDELSEDDKLTVAR	820.953	3279.78	2975.58	10	4	7.47	4.38	1	iTRAQ8plex[+304.20536] (K19)	2	4	2.0252e+07	2.90141e+07	0.0240519	7.83968	20.0741	0.0579009	rep2	Yes
9	Cluster12089	Peptide	NLQDIIAILGMDELSEDDKLTVAR	1094.27	3279.78	3279.79	2.74	3	2.41	0	0.95	iTRAQ8plex[+304.20536] (N-term); iTRAQ8plex[+304.20536] (K19)	2	5	975135	1.5201e+07	1.14115	0.292389	0.0331811	5.16907	rep2	Yes
9	Cluster12089	Peptide	QISELGIYPAVDPLDSTSR	1022.52	2043.02	2043.02	0	2	2.31	0	0.95	Gln->pyro-Glu[-17.026549] (N-term)	2	3	7.43133e+06	1.31574e+07	0	0	0	0	rep1	No
9	Cluster12089	Peptide	QISELGIYPAVDPLDSTSR	1183.13	2364.24	2060.04	10	2	5	4.52	0.97		2	3	2.88704e+07	1.54736e+08	0	0	0	0	rep1	No
9	Cluster12089	Peptide	QISELGIYPAVDPLDSTSR	668.119	2668.44	2668.45	2.7	4	2.61	0	0.95	iTRAQ8plex[+304.20536] (N-term); iTRAQ8plex[+304.20536] (Y8)	2	1	2.05385e+07	2.05385e+07	1.13201	0.0592911	0.598597	0.492745	rep2	Yes
9	Cluster12089	Peptide	QISELGIYPAVDPLDSTSR	1183.13	2364.25	2364.25	0.84	2	5.2	4.63	0.97	iTRAQ8plex[+304.20536] (N-term)	2	10	2.97798e+06	5.70373e+07	1.46267	0.133325	29.9352	2.19958	rep1	Yes
9	Cluster12089	Peptide	QISELGIYPAVDPLDSTSR	783.414	2347.22	2347.22	0.64	3	2.41	0	0.95	Gln->pyro-Glu[-17.026549] (N-term); iTRAQ8plex[+304.20536] (Y8)	2	1	6.36095e+06	6.36095e+06	1.48762	24.9924	17.7124	2.40552	rep1	Yes
9	Cluster12089	Peptide	QISELGIYPAVDPLDSTSR	796.414	2386.22	2386.22	0.63	3	2.41	0	0.95	iTRAQ8plex[+304.20536] (N-term); Cation:Na[+21.981943] (E4)	2	1	1.08152e+07	1.08152e+07	1.79885	0.279797	11.5293	13.6053	rep1	Yes
9	Cluster12089	Peptide	TEHYLPIHR	368.209	1468.81	1164.6	10	4	3.31	1.55	1		2	5	4.06569e+07	1.90246e+08	0	0	0	0	rep1	No
9	Cluster12089	Peptide	TEHYLPIHR	368.208	1468.8	1468.81	5.17	4	2.61	0	0.95	iTRAQ8plex[+304.20536] (N-term)	2	1	5.47451e+06	5.47451e+06	1.18087	0.122722	0.793921	8.24618	rep2	Yes
9	Cluster12089	Peptide	TIAMDGTEGLVR	528.284	1581.83	1277.63	10	3	3.38	4.53	1	Oxidation[+15.994915] (M4)	2	6	4.12762e+07	2.84614e+08	0	0	0	0	rep2	No
9	Cluster12089	Peptide	TIAMDGTEGLVR	783.926	1565.84	1261.63	10	2	3.86	4.69	0.98		2	3	1.4866e+08	2.36447e+08	0	0	0	0	rep1	No
9	Cluster12089	Peptide	TVLIMELINNVAK	1033.63	2065.24	1761.04	10	2	4.31	6.25	1	iTRAQ8plex[+304.20536] (K13)	2	5	1.69306e+06	4.89422e+07	1.18848	7.95725	0.602578	0.269929	rep2	Yes
9	Cluster12089	Peptide	TVLIMELINNVAK	1033.63	2065.24	2065.24	2.91	2	2.31	0	0.95	iTRAQ8plex[+304.20536] (N-term); iTRAQ8plex[+304.20536] (K13)	2	13	1.69306e+06	1.21278e+08	1.18848	7.95724	0.602579	0.269928	rep2	Yes
9	Cluster12089	Peptide	TVLIMELINNVAK	694.419	2080.23	2080.25	1.59	3	2.41	0	0.95	iTRAQ8plex[+304.20536] (N-term); iTRAQ8plex[+304.20536] (K13); Deamidated[+0.984016] (N10)	2	21	1.24317e+07	2.36987e+08	0.0325672	6.10047	0.408269	29.4824	rep1	Yes
9	Cluster12089	Peptide	TVLIMELINNVAK	1041.12	2080.23	2080.24	0.96	2	2.31	0	0.95	iTRAQ8plex[+304.20536] (N-term); iTRAQ8plex[+304.20536] (K13); Deamidated[+0.984016] (N9)	2	18	8.41548e+06	1.58658e+08	0.00703251	0.0234383	77.0585	6.54924	rep1	Yes
9	Cluster12089	Peptide	TYDYGGK	706.384	1410.75	1106.56	10	2	3.08	2.71	0.95	iTRAQ8plex[+304.20536] (K7)	2	1	3.88029e+06	3.88029e+06	0.0120675	5.73723	26.585	263.392	rep2	Yes
9	Cluster12089	Peptide	TYDYGGK	706.384	1410.75	1410.76	3.12	2	2.31	0	0.95	iTRAQ8plex[+304.20536] (N-term); iTRAQ8plex[+304.20536] (K7)	2	1	3.88029e+06	3.88029e+06	0.0120674	5.73722	26.5851	263.392	rep2	Yes
9	Cluster12089	Peptide	VCQVIGAIVDVR	811.453	1620.89	1620.9	2.47	2	2.31	0	0.95	iTRAQ8plex[+304.20536] (N-term); Methylthio (C2)	2	2	3.25512e+06	7.02631e+06	0.068395	0.107267	0.604414	0.390934	rep2	Yes
9	Cluster12089	Peptide	VGLTGLTVAEYFR	726.399	1450.78	1450.79	1.65	2	2.31	0	0.95	Delta:H(2)C(2)[+26.01565] (N-term)	2	1	1.77981e+07	1.77981e+07	0	0	0	0	rep2	No
9	Cluster12089	Peptide	VGLTGLTVAEYFR	865.494	1728.97	1424.77	10	2	4.57	4.81	0.98		2	10	1.89563e+07	1.90098e+08	0	0	0	0	rep1	No
9	Cluster12089	Peptide	VGLTGLTVAEYFR	678.731	2033.17	2033.17	2.51	3	2.41	0	0.95	iTRAQ8plex[+304.20536] (N-term); iTRAQ8plex[+304.20536] (Y11)	2	3	6.05058e+06	1.91148e+07	1.06781	0.0821519	0.575284	32.3953	rep2	Yes
9	Cluster12089	Peptide	VGLTGLTVAEYFR	865.493	1728.97	1728.97	1.39	2	2.31	0	0.95	iTRAQ8plex[+304.20536] (N-term)	2	14	3.45028e+07	2.7793e+08	2.8089	1.54212	0.287249	1.69081	rep1	Yes
9	Cluster12089	Peptide	VLNTGAPITVPVGR	710.42	1418.82	1418.83	1.69	2	2.31	0	0.95	Delta:H(2)C(2)[+26.01565] (N-term)	2	1	2.80555e+07	2.80555e+07	0	0	0	0	rep2	No
9	Cluster12089	Peptide	VLNTGAPITVPVGR	849.512	1697.01	1392.81	10	2	4.68	6.01	1		2	5	1.74291e+08	6.19431e+08	0	0	0	0	rep1	No
9	Cluster12089	Peptide	VLNTGAPITVPVGR	850.004	1697.99	1698	1.41	2	2.31	0	0.95	iTRAQ8plex[+304.20536] (N-term); Deamidated[+0.984016] (N3)	2	1	1.84458e+07	1.84458e+07	1.24444	0.32619	0.583481	10.9138	rep2	Yes
9	Cluster12089	Peptide	VLQNYK	458.283	1371.83	1067.63	9.5	3	2.43	3.5	0.95	iTRAQ8plex[+304.20536] (K6)	2	1	1.65885e+08	1.65885e+08	1.27808	5.24806	0.117907	0.381744	rep1	Yes
9	Cluster12089	Peptide	VLQNYK	686.921	1371.83	1371.83	2.92	2	2.31	0	0.95	iTRAQ8plex[+304.20536] (N-term); iTRAQ8plex[+304.20536] (K6)	2	1	1.87555e+07	1.87555e+07	1.11596	0.270341	0.603245	396.585	rep2	Yes
9	Cluster12089	Peptide	VLSTLLRSSSXRSAAR	615.014	1842.02	1728.95	10	3	3.07	2.35	0.95	Acetyl[+42.010565] (S8); Acetyl[+42.010565] (S9); Acetyl[+42.010565] (S10)	2	1	1.67745e+07	1.67745e+07	0	0	0	0	rep1	No
9	Cluster12089	Peptide	VVDLLAPYQR	493.295	1476.86	1172.66	10	3	3.8	6.61	1		2	9	5.59916e+06	3.87504e+08	0	0	0	0	rep2	No
9	Cluster12089	Peptide	VVDLLAPYQR	502.64	1504.9	1200.69	10	3	3.85	3.67	0.96	Dimethyl[+28.0313] (R10)	2	7	2.51647e+07	1.57184e+08	0	0	0	0	rep2	No
9	Cluster12089	Peptide	VVDLLAPYQR	600.342	1198.67	1198.67	1.84	2	2.31	0	0.95	Delta:H(2)C(2)[+26.01565] (N-term)	2	1	1.19639e+07	1.19639e+07	0	0	0	0	rep2	No
9	Cluster12089	Peptide	VVDLLAPYQR	675.409	1348.8	1348.81	2.82	2	2.31	0	0.95	iTRAQ8plex[+304.20536] (N-term); Arg-loss[-156.101111] (C-term)	2	1	1.28001e+06	1.28001e+06	1.17433	0.634972	52.7915	0.124655	rep2	Yes
9	Cluster12089	Peptide	VVDLLAPYQR	493.295	1476.86	1172.66	2.81	3	2.41	0	0.95	iTRAQ8plex[+304.20536] (N-term)	2	30	5.59916e+06	2.52057e+08	1.10191	0.370976	0.584593	29.1027	rep2	Yes
9	Cluster12089	Peptide	VVDLLAPYQR	594.693	1781.06	1781.06	2.36	3	2.41	0	0.95	iTRAQ8plex[+304.20536] (N-term); iTRAQ8plex[+304.20536] (Y8)	2	12	2.23946e+07	154910644	1.23983	0.0703415	45.6506	0.617058	rep2	Yes
10	Cluster16641	Peptide	ADLNVPLDDNQTITDDTR	1021.49	2040.96	2040.96	0.98	2	2.31	0	0.95	Delta:H(2)C(2)[+26.01565] (N-term)	2	6	2.19626e+06	7.84009e+06	0	0	0	0	rep1	No
10	Cluster16641	Peptide	ADLNVPLDDNQTITDDTR	1160.58	2319.15	2014.94	10	2	5.21	5.92	1		2	18	3.4939e+07	4.11771e+08	0	0	0	0	rep1	No
10	Cluster16641	Peptide	ADLNVPLDDNQTITDDTR	1161.08	2320.13	2320.12	0.86	2	2.31	0	0.95	iTRAQ8plex[+304.20536] (N-term); Deamidated[+0.984016] (N10)	2	10	1.04369e+07	5.84634e+07	0.0361066	0.0320382	29.06	1.84331	rep1	Yes
10	Cluster16641	Peptide	ADLNVPLDDNQTITDDTR	1160.58	2319.14	2319.15	0.86	2	2.31	0	0.95	iTRAQ8plex[+304.20536] (N-term)	2	30	8.25694e+06	1.35235e+08	5.29578	3.97972	0.286677	2.49903	rep1	Yes
10	Cluster16641	Peptide	AHASTEGVTK	536.975	1607.9	1303.7	9.5	3	4.31	5.71	1	iTRAQ8plex[+304.20536] (K10)	2	3	3.032e+07	9.05313e+07	1.64529	1.06996	0.204231	1.31995	rep1	Yes
10	Cluster16641	Peptide	AHASTEGVTK	846.988	1691.96	1607.91	2.49	2	2.31	0	0.95	iTRAQ8plex[+304.20536] (N-term); iTRAQ8plex[+304.20536] (K10)	2	2	4.53498e+06	2.25196e+07	0.568955	30.4627	24.2821	470.434	rep1	Yes
10	Cluster16641	Peptide	AQGLSVGSSLVEEDKLELATSLLAK	868.506	3468.99	3165.8	9.5	4	6.07	4.11	1	iTRAQ8plex[+304.20536] (K15); iTRAQ8plex[+304.20536] (K25)	2	37	3.81767e+06	6.65305e+07	1.3742	0.0931631	0.389201	0.101044	rep1	Yes
10	Cluster16641	Peptide	ELDYLVGAVSSPK	993.569	1985.12	1680.92	10	2	4.59	5.88	1	iTRAQ8plex[+304.20536] (K13)	2	7	6.62648e+06	6.58992e+08	1.00538	2.89226	26.0265	5.6116	rep2	Yes
10	Cluster16641	Peptide	ELDYLVGAVSSPK	764.112	2289.31	2289.32	2.23	3	2.41	0	0.95	iTRAQ8plex[+304.20536] (N-term); iTRAQ8plex[+304.20536] (K13); iTRAQ8plex[+304.20536] (S11)	2	2	1.12887e+07	2.73726e+07	0.00706361	0.0916383	49.5542	0.114985	rep2	Yes
10	Cluster16641	Peptide	ELDYLVGAVSSPK	1006.58	2011.14	2011.14	1.99	2	2.31	0	0.95	Delta:H(2)C(2)[+26.01565] (N-term); iTRAQ8plex[+304.20536] (K13); iTRAQ8plex[+304.20536] (Y4)	2	1	1.41581e+07	1.41581e+07	1.03044	0.0776857	0.758085	0.0308836	rep2	Yes
10	Cluster16641	Peptide	ELDYLVGAVSSPK	764.114	2289.32	2289.33	1.57	3	2.41	0	0.95	iTRAQ8plex[+304.20536] (N-term); iTRAQ8plex[+304.20536] (K13); iTRAQ8plex[+304.20536] (Y4)	2	2	2.16312e+07	3.57023e+07	0.928017	3.34456	0.452738	2.43503	rep1	Yes
10	Cluster16641	Peptide	ELDYLVGAVSSPK	993.571	1985.13	1680.92	1.55	2	2.31	0	0.95	iTRAQ8plex[+304.20536] (N-term); iTRAQ8plex[+304.20536] (K13)	2	6	1.52013e+07	6.03429e+07	1.56419	2.63632	0.50842	2.45978	rep1	Yes
10	Cluster16641	Peptide	FSLAPLVPR	513.311	1024.61	1024.61	2.15	2	2.31	0	0.95	Delta:H(2)C(2)[+26.01565] (N-term)	2	2	8.35204e+06	1.42877e+07	0	0	0	0	rep2	No
10	Cluster16641	Peptide	FSLAPLVPR	652.404	1302.79	998.591	10	2	3.1	3.06	0.95		2	22	1.09676e+09	1.81504e+09	0	0	0	0	rep1	No
10	Cluster16641	Peptide	GVTTIIGGGDSVAAVEK	1091.63	2181.24	1877.04	10	2	7.07	7.82	1	iTRAQ8plex[+304.20536] (K17)	2	17	5.87869e+06	6.21278e+08	1.03688	0.0719604	70.7975	3.76226	rep2	Yes
10	Cluster16641	Peptide	GVTTIIGGGDSVAAVEK	829.487	2485.44	2485.44	2.05	3	2.41	0	0.95	iTRAQ8plex[+304.20536] (N-term); iTRAQ8plex[+304.20536] (K17); iTRAQ8plex[+304.20536] (S11)	2	3	4.92675e+06	3.13094e+07	0.0135556	0.275941	0.603261	4.35049	rep2	Yes
10	Cluster16641	Peptide	GVTTIIGGGDSVAAVEK	1091.62	2181.23	2181.24	1.83	2	2.31	0	0.95	iTRAQ8plex[+304.20536] (N-term); iTRAQ8plex[+304.20536] (K17)	2	31	5.87869e+06	2.52696e+08	1.03689	0.0719605	70.7975	3.76225	rep2	Yes
10	Cluster16641	Peptide	LASLADLYVNDAFGTAHR	654.004	1958.99	1958.99	2.76	3	2.42	0	0.95	Delta:H(2)C(2)[+26.01565] (N-term)	2	2	8.70789e+06	2.38349e+07	0	0	0	0	rep2	No
10	Cluster16641	Peptide	LASLADLYVNDAFGTAHR	746.731	2237.17	1932.97	10	3	4.74	5.87	1		2	7	8.17328e+06	3.73977e+07	0	0	0	0	rep2	No
10	Cluster16641	Peptide	VLPGVIALDEAIAVTV	942.57	1883.12	1578.92	10	2	3.63	5.18	0.99		2	11	2.90565e+06	7.37552e+07	0	0	0	0	rep1	No
10	Cluster16641	Peptide	VLPGVIALDEAIAVTV	942.571	1883.13	1883.12	0	2	2.31	0	0.95	iTRAQ8plex[+304.20536] (N-term)	2	2	7103657	8.74446e+06	1.01793	7.01477	0.52134	15.3754	rep2	Yes
10	Cluster16641	Peptide	VVSASGIEDGWMGLDIGPDSIK	952.175	2853.51	2549.3	10	3	6.24	7.62	1	iTRAQ8plex[+304.20536] (K22)	2	16	1.61306e+07	2.89079e+08	0.0106825	0.107021	0.717521	0.273598	rep2	Yes
10	Cluster16641	Peptide	VVSASGIEDGWMGLDIGPDSIK	946.171	2835.49	2835.49	1.27	3	2.41	0	0.95	iTRAQ8plex[+304.20536] (N-term); iTRAQ8plex[+304.20536] (K22); Glu->pyro-Glu[-18.010565] (D9)	2	1	1.43749e+07	1.43749e+07	1.14787	0.186905	26.0893	0.189737	rep2	Yes
10	Cluster16641	Peptide	VVSASGIEDGWMGLDIGPDSIK	952.174	2853.5	2851.5	1.05	3	2.41	0	0.95	iTRAQ8plex[+304.20536] (N-term); iTRAQ8plex[+304.20536] (K22)	2	35	1.38139e+07	2.70305e+08	0.0150124	8.8044	0.4929	16.4604	rep1	Yes
11	Cluster49031	Peptide	AVAMSATEGLK	843.484	1684.95	1380.76	10	2	5.51	6.22	1	iTRAQ8plex[+304.20536] (K11)	2	20	6.34683e+06	2027115655	0.00853004	0.144851	0.873691	3.07759	rep2	Yes
11	Cluster49031	Peptide	AVAMSATEGLK	850.495	1698.98	1698.98	2.47	2	2.31	0	0.95	iTRAQ8plex[+304.20536] (N-term); iTRAQ8plex[+304.20536] (K11); Pro->pyro-Glu[+13.979265] (L10)	2	2	2.48561e+06	3.48416e+07	28.7528	0.111914	36.929	4.86039	rep2	Yes
11	Cluster49031	Peptide	AVAMSATEGLK	843.484	1684.95	1684.96	2.37	2	2.31	0	0.95	iTRAQ8plex[+304.20536] (N-term); iTRAQ8plex[+304.20536] (K11)	2	26	6.34683e+06	2.63857e+08	0.00853006	0.144851	0.873689	3.07757	rep2	Yes
11	Cluster49031	Peptide	AVAMSATEGLKR	532.64	1594.9	1290.7	10	3	3.03	2.68	0.95	Oxidation[+15.994915] (M4); Methyl[+14.01565] (K11); Dimethyl[+28.0313] (R12)	2	1	3.53421e+07	3.53421e+07	0	0	0	0	rep1	No
11	Cluster49031	Peptide	DTLGQEINVTCEVQQLLGNNR	902.46	2704.36	2400.17	10	3	4.97	4.93	1	Carbamidomethyl[+57.021464] (C11)	2	1	3.14949e+07	3.14949e+07	0	0	0	0	rep1	No
11	Cluster49031	Peptide	DTLGQEINVTCEVQQLLGNNR	985.192	2952.55	2952.54	2.54	3	2.41	0	0.95	iTRAQ8plex[+304.20536] (N-term); iTRAQ8plex[+304.20536] (T10); Methylthio (C11); Deamidated[+0.984016] (N19)	2	2	3.94227e+06	1.76239e+07	1.19291	0.140516	0.685325	0.160393	rep2	Yes
11	Cluster49031	Peptide	DTLGQEINVTCEVQQLLGNNR	984.859	2951.55	2951.55	2.13	3	2.41	0	0.95	iTRAQ8plex[+304.20536] (N-term); iTRAQ8plex[+304.20536] (T10); Methylthio (C11)	2	2	1.35185e+07	3.72018e+07	1.25788	0.117871	0.624117	0.0719245	rep2	Yes
11	Cluster49031	Peptide	DTLGQEINVTCEVQQLLGNNR	985.189	2952.54	2952.55	2.13	3	2.41	0	0.95	iTRAQ8plex[+304.20536] (N-term); iTRAQ8plex[+304.20536] (T10); Methylthio (C11); Deamidated[+0.984016] (N20)	2	1	4.56177e+06	4.56177e+06	1.26481	0.124807	0.702893	0.174789	rep2	Yes
11	Cluster49031	Peptide	DTLGQEINVTCEVQQLLGNNR	899.12	2694.34	2694.33	1.78	3	2.41	0	0.95	iTRAQ8plex[+304.20536] (N-term); Methylthio (C11); Deamidated[+0.984016] (N20)	2	4	7.40975e+06	1.64819e+07	1.12235	6.35395	20.4883	0.331887	rep2	Yes
11	Cluster49031	Peptide	DTLGQEINVTCEVQQLLGNNR	906.114	2715.32	2715.32	1.77	3	2.41	0	0.95	iTRAQ8plex[+304.20536] (N-term); Methylthio (C11); Cation:Na[+21.981943] (E12)	2	1	7.38915e+06	7.38915e+06	1.08806	0.109554	0.627294	0.23183	rep2	Yes
11	Cluster49031	Peptide	DTLGQEINVTCEVQQLLGNNR	1347.67	2693.33	2614.35	1.53	2	2.31	0	0.95	iTRAQ8plex[+304.20536] (N-term); Methylthio (C11)	2	63	9.08506e+06	6.82076e+08	338.674	0.026579	64.0476	1.34428	rep1	Yes
11	Cluster49031	Peptide	DTLGQEINVTCEVQQLLGNNR	899.12	2694.34	2694.34	1.34	3	2.41	0	0.95	iTRAQ8plex[+304.20536] (N-term); Methylthio (C11); Deamidated[+0.984016] (Q14)	2	1	1.23035e+07	1.23035e+07	0.0501546	0.0452028	52.931	23.5446	rep1	Yes
11	Cluster49031	Peptide	DTLGQEINVTCEVQQLLGNNR	872.131	2613.37	2613.37	1.15	3	2.41	0	0.95	iTRAQ8plex[+304.20536] (N-term); Methylthio (C11); Glu->pyro-Glu[-18.010565] (E12)	2	2	3.71777e+07	5.49893e+07	8.26309	6.32629	0.0478424	105.572	rep1	Yes
11	Cluster49031	Peptide	DTLGQEINVTCEVQQLLGNNR	899.115	2694.32	2694.35	1.11	3	2.41	0	0.95	iTRAQ8plex[+304.20536] (N-term); Deamidated[+0.984016] (N8); Methylthio (C11)	2	4	3.02642e+07	4.42619e+07	6.34171	0.0570073	105.035	52.3872	rep1	Yes
11	Cluster49031	Peptide	EKNNLGR	588.84	1175.66	1437.84	2.5	2	2.31	0	0.95	iTRAQ8plex[+304.20536] (N-term); iTRAQ8plex[+304.20536] (K2)	2	1	7.08863e+06	7.08863e+06	0.0181404	0.414172	0.259067	243.561	rep1	Yes
11	Cluster49031	Peptide	EKNNLGR	559.313	1116.61	1116.61	1.79	2	2.31	0	0.95	Glu->pyro-Glu[-18.010565] (N-term); iTRAQ8plex[+304.20536] (K2); Deamidated[+0.984016] (N3)	2	1	1.08412e+07	1.08412e+07	0.529877	4.81326	36.5843	0.881149	rep2	Yes
11	Cluster49031	Peptide	EKNNLGR	720.423	1438.83	1438.83	1.67	2	2.31	0	0.95	iTRAQ8plex[+304.20536] (N-term); iTRAQ8plex[+304.20536] (K2); Deamidated[+0.984016] (N3)	2	3	6.33918e+06	2.26145e+07	1.36631	1.37762	78.0818	0.818006	rep1	Yes
11	Cluster49031	Peptide	GMDVVDMGNPLSVPVGGATLGR	821.428	2461.26	2157.06	10	3	4.53	3.84	0.98	Oxidation[+15.994915] (M7)	2	9	5.13482e+08	661842148	0	0	0	0	rep1	No
11	Cluster49031	Peptide	GMDVVDMGNPLSVPVGGATLGR	826.757	2477.25	2173.05	10	3	5.45	6.62	1	Oxidation[+15.994915] (M2); Oxidation[+15.994915] (M7)	2	31	4.75557e+06	1.3231e+09	0	0	0	0	rep2	No
11	Cluster49031	Peptide	GMDVVDMGNPLSVPVGGATLGR	1223.64	2445.26	2141.06	10	2	5.59	6.48	1		2	16	6.5273e+07	6.60329e+08	0	0	0	0	rep1	No
11	Cluster49031	Peptide	GMDVVDMGNPLSVPVGGATLGR	1231.64	2461.26	2157.06	10	2	5.01	5.4	0.99	Oxidation[+15.994915] (M2)	2	12	3.63512e+07	7.04901e+08	0	0	0	0	rep1	No
11	Cluster49031	Peptide	GMDVVDMGNPLSVPVGGATLGR	917.496	2749.46	2749.47	2.29	3	2.41	0	0.95	iTRAQ8plex[+304.20536] (N-term); iTRAQ8plex[+304.20536] (S12)	2	2	7.96571e+06	2.13289e+07	103.521	0.252024	60.8982	0.199714	rep2	Yes
11	Cluster49031	Peptide	GMDVVDMGNPLSVPVGGATLGR	625.552	2498.18	2498.18	1.92	4	2.61	0	0.95	iTRAQ8plex[+304.20536] (N-term); Deamidated[+0.984016] (N9)	2	1	1.19345e+07	1.19345e+07	1.06744	0.133699	0.689526	68.7112	rep2	Yes
11	Cluster49031	Peptide	GMDVVDMGNPLSVPVGGATLGR	621.81	2483.21	2483.21	1.77	4	2.61	0	0.95	iTRAQ8plex[+304.20536] (N-term); Cation:K[+37.955882] (D6)	2	1	1.78272e+07	1.78272e+07	1.01699	0.0795666	0.00479933	1.01817	rep2	Yes
11	Cluster49031	Peptide	GMDVVDMGNPLSVPVGGATLGR	820.748	2459.22	2459.22	1.46	3	2.41	0	0.95	iTRAQ8plex[+304.20536] (N-term); Pro->pyro-Glu[+13.979265] (P10)	2	1	5.57022e+06	5.57022e+06	1.20789	23.053	0.531725	0.678457	rep2	Yes
11	Cluster49031	Peptide	GMDVVDMGNPLSVPVGGATLGR	1223.64	2445.26	2445.26	0	2	2.31	0	0.95	iTRAQ8plex[+304.20536] (N-term)	2	23	1.0516e+06	1.35824e+08	1.45316	0.174839	0.432763	2.1622	rep1	Yes
11	Cluster49031	Peptide	GRDTLGQEINVTCEVQQLLGNNR	970.492	2908.45	2908.46	1.75	3	2.41	0	0.95	iTRAQ8plex[+304.20536] (N-term); Methylthio (C13)	2	1	2.25047e+07	2.25047e+07	0.00724363	0.0763342	0.66849	0.142958	rep2	Yes
11	Cluster49031	Peptide	IAQIIGPVLDVAFPPGK	586.61	2342.41	2038.21	10	4	5.25	4.71	1	iTRAQ8plex[+304.20536] (K17)	2	25	1.6253e+07	9.32356e+08	0.96037	8.25479	0.62364	1.72783	rep2	Yes
11	Cluster49031	Peptide	IAQIIGPVLDVAFPPGK	775.807	2324.4	2324.4	1.81	3	2.41	0	0.95	iTRAQ8plex[+304.20536] (N-term); iTRAQ8plex[+304.20536] (K17); Glu->pyro-Glu[-18.010565] (D10)	2	2	5.67328e+06	1.41654e+07	1.12268	6.16457	0.597251	0.799641	rep2	Yes
11	Cluster49031	Peptide	IAQIIGPVLDVAFPPGK	596.096	2380.35	2380.36	1.68	4	2.61	0	0.95	iTRAQ8plex[+304.20536] (N-term); iTRAQ8plex[+304.20536] (K17); Cation:K[+37.955882] (D10)	2	1	3.00673e+07	3.00673e+07	1.05077	8.40329	0.369647	1.82108	rep1	Yes
11	Cluster49031	Peptide	IAQIIGPVLDVAFPPGK	1172.22	2342.42	2038.21	0.98	2	2.31	0	0.95	iTRAQ8plex[+304.20536] (N-term); iTRAQ8plex[+304.20536] (K17)	2	25	8.26223e+06	2.9951e+08	0.0160132	0.0298459	0.383087	10.0276	rep1	Yes
11	Cluster49031	Peptide	IAQIIGPVLDVAFPPGK	1033.12	2064.23	2064.22	0.97	2	2.31	0	0.95	Delta:H(2)C(2)[+26.01565] (N-term); iTRAQ8plex[+304.20536] (K17)	2	13	5.32729e+06	1.4138e+08	1.55408	7.26649	0.34435	0.0501323	rep1	Yes
11	Cluster49031	Peptide	IFNVLGEPVDNLGPVDTLTTSPIHK	1095.62	3283.82	2979.62	10	3	8.1	8.78	1	iTRAQ8plex[+304.20536] (K25)	2	22	1.98646e+07	6.66369e+08	3.86084	0.0830348	0.692291	2.81004	rep2	Yes
11	Cluster49031	Peptide	IFNVLGEPVDNLGPVDTLTTSPIHK	599.01	3588.02	3588.02	2.51	6	2.61	0	0.95	iTRAQ8plex[+304.20536] (N-term); iTRAQ8plex[+304.20536] (K25); iTRAQ8plex[+304.20536] (T17)	2	1	2.46123e+07	2.46123e+07	0.929738	0.0421188	0.606475	0.0376264	rep2	Yes
11	Cluster49031	Peptide	IFNVLGEPVDNLGPVDTLTTSPIHK	718.61	3588.01	3588.02	2.23	5	2.61	0	0.95	iTRAQ8plex[+304.20536] (N-term); iTRAQ8plex[+304.20536] (K25); Deamidated[+0.984016] (N3)	2	1	2.89196e+07	2.89196e+07	1.08249	0.141389	0.663992	0.434536	rep2	Yes
11	Cluster49031	Peptide	IFNVLGEPVDNLGPVDTLTTSPIHK	827.204	3304.78	3383.84	2.13	4	2.61	0	0.95	iTRAQ8plex[+304.20536] (N-term); iTRAQ8plex[+304.20536] (K25); Deamidated[+0.984016] (N11)	2	2	3.10477e+07	3.22703e+07	1.44849	4.32264	89.529	29.231	rep1	Yes
11	Cluster49031	Peptide	IFNVLGEPVDNLGPVDTLTTSPIHK	898.012	3588.02	3588	2.12	4	2.61	0	0.95	iTRAQ8plex[+304.20536] (N-term); iTRAQ8plex[+304.20536] (K25); iTRAQ8plex[+304.20536] (S21)	2	68	1.96785e+06	2.19014e+08	0.954207	5.6955	0.624559	0.162778	rep2	Yes
11	Cluster49031	Peptide	IFNVLGEPVDNLGPVDTLTTSPIHK	898.258	3589	3589.01	2.01	4	2.61	0	0.95	iTRAQ8plex[+304.20536] (N-term); iTRAQ8plex[+304.20536] (K25); iTRAQ8plex[+304.20536] (S21); Deamidated[+0.984016] (N3)	2	1	1.22256e+07	1.22256e+07	1.09532	6.66711	0.6804	0.0505245	rep2	Yes
11	Cluster49031	Peptide	IFNVLGEPVDNLGPVDTLTTSPIHK	1095.62	3283.82	2979.62	2.01	3	2.41	0	0.95	iTRAQ8plex[+304.20536] (N-term); iTRAQ8plex[+304.20536] (K25)	2	83	9.50595e+06	4.49663e+08	1.57895	0.0639752	29.2048	4.85309	rep1	Yes
11	Cluster49031	Peptide	IFNVLGEPVDNLGPVDTLTTSPIHK	1002.89	3005.64	3005.64	2	3	2.41	0	0.95	Delta:H(2)C(2)[+26.01565] (N-term); iTRAQ8plex[+304.20536] (K25)	2	2	7.73088e+06	1.90035e+07	1.47726	0.246485	40.1757	14.3489	rep2	Yes
11	Cluster49031	Peptide	IFNVLGEPVDNLGPVDTLTTSPIHK	898.259	3589.01	3589.01	1.89	4	2.61	0	0.95	iTRAQ8plex[+304.20536] (N-term); iTRAQ8plex[+304.20536] (K25); iTRAQ8plex[+304.20536] (S21); Deamidated[+0.984016] (N11)	2	2	4.167e+06	5.64318e+06	0.979452	0.174145	0.626737	0.0882841	rep2	Yes
11	Cluster49031	Peptide	INPTTSDPAVSIR	837.969	1673.92	1369.72	10	2	4.17	4.32	0.95		2	55	1.21752e+07	3.368e+09	0	0	0	0	rep2	No
11	Cluster49031	Peptide	INPTTSDPAVSIR	850.979	1699.94	1699.95	2.47	2	2.31	0	0.95	Delta:H(2)C(2)[+26.01565] (N-term); iTRAQ8plex[+304.20536] (S11)	2	1	2.99334e+06	2.99334e+06	1.34133	6.21656	39.7568	143.356	rep2	Yes
11	Cluster49031	Peptide	INPTTSDPAVSIR	837.967	1673.92	1369.72	2.19	2	2.31	0	0.95	iTRAQ8plex[+304.20536] (N-term)	2	84	3.84793e+06	5.06297e+08	1.11892	6.29081	0.620998	0.0496634	rep2	Yes
11	Cluster49031	Peptide	INPTTSDPAVSIR	990.07	1978.12	1978.13	2.02	2	2.31	0	0.95	iTRAQ8plex[+304.20536] (N-term); iTRAQ8plex[+304.20536] (S11)	2	4	3.16457e+06	2.6884e+07	1.23809	0.537881	0.575625	4.10374	rep2	Yes
11	Cluster49031	Peptide	INPTTSDPAVSIR	495.538	1978.12	1978.12	1.42	4	2.61	0	0.95	iTRAQ8plex[+304.20536] (N-term); iTRAQ8plex[+304.20536] (S6)	2	1	2.86393e+07	2.86393e+07	0.602749	4.31608	0.0814063	0.286163	rep1	Yes
11	Cluster49031	Peptide	MPNIYNALVVK	935.554	1869.09	1564.9	10	2	5.05	6.38	1	iTRAQ8plex[+304.20536] (K11)	2	17	7.92473e+06	2045507360	1.01978	0.151647	0.660815	0.0330175	rep2	Yes
11	Cluster49031	Peptide	MPNIYNALVVK	1087.66	2173.3	2173.3	2.76	2	2.31	0	0.95	iTRAQ8plex[+304.20536] (N-term); iTRAQ8plex[+304.20536] (K11); iTRAQ8plex[+304.20536] (Y5)	2	1	630975	630975	0.990107	6.25798	0.0253182	4.84449	rep2	Yes
11	Cluster49031	Peptide	MPNIYNALVVK	935.554	1869.09	1868.97	2.25	2	2.31	0	0.95	iTRAQ8plex[+304.20536] (N-term); iTRAQ8plex[+304.20536] (K11)	2	11	7.92473e+06	1.37321e+08	1.01978	0.151647	0.660815	0.0330174	rep2	Yes
11	Cluster49031	Peptide	RGMDVVDMGNPLSVPVGGATLGR	786.062	2355.16	2355.17	2.67	3	2.42	0	0.95	Acetyl[+42.010565] (N-term); Oxidation[+15.994915] (M8)	2	1	2.59864e+07	2.59864e+07	0	0	0	0	rep2	No
11	Cluster49031	Peptide	RGMDVVDMGNPLSVPVGGATLGR	868.127	2601.37	2297.16	10	3	5.68	6.58	1		2	1	1.31225e+07	1.31225e+07	0	0	0	0	rep2	No
11	Cluster49031	Peptide	RGMDVVDMGNPLSVPVGGATLGR	873.457	2617.35	2313.16	10	3	5	4.92	1	Oxidation[+15.994915] (M8)	2	1	9.62371e+06	9.62371e+06	0	0	0	0	rep2	No
11	Cluster49031	Peptide	RGMDVVDMGNPLSVPVGGATLGR	873.46	2617.36	2313.16	10	3	4.72	5	1	Oxidation[+15.994915] (M3)	2	3	3.3392e+07	8.95943e+07	0	0	0	0	rep1	No
11	Cluster49031	Peptide	RGMDVVDMGNPLSVPVGGATLGR	878.793	2633.36	2329.15	10	3	4.49	3.46	0.95	Oxidation[+15.994915] (M3); Oxidation[+15.994915] (M8)	2	3	1.6781e+07	9.71009e+07	0	0	0	0	rep2	No
11	Cluster49031	Peptide	RGMDVVDMGNPLSVPVGGATLGR	868.127	2601.36	2601.36	2.42	3	2.41	0	0.95	iTRAQ8plex[+304.20536] (N-term)	2	4	1.31225e+07	3.34707e+07	1.28	0.103749	57.6642	0.25625	rep2	Yes
11	Cluster49031	Peptide	RINPTTSDPAVSIR	813.911	1625.81	1625.81	0	2	2.31	0	0.95	Succinyl[+100.016044] (N-term)	2	1	7.12122e+06	7.12122e+06	0	0	0	0	rep1	No
11	Cluster49031	Peptide	SAPAFIDLDTTLSIFETGIK	916.514	2746.52	2442.32	10	3	5.34	7.82	1	iTRAQ8plex[+304.20536] (K20)	2	45	2.232e+07	6.03286e+08	0.00691266	6.70712	0.631814	0.638054	rep2	Yes
11	Cluster49031	Peptide	SAPAFIDLDTTLSIFETGIK	923.842	2768.5	2768.51	1.73	3	2.41	0	0.95	iTRAQ8plex[+304.20536] (N-term); iTRAQ8plex[+304.20536] (K20); Cation:Na[+21.981943] (E16)	2	1	6.25863e+06	6.25863e+06	1.11995	7.65957	0.616692	0.375499	rep2	Yes
11	Cluster49031	Peptide	SAPAFIDLDTTLSIFETGIK	1235.17	2468.33	2468.33	1.62	2	2.31	0	0.95	Delta:H(2)C(2)[+26.01565] (N-term); iTRAQ8plex[+304.20536] (K20)	2	4	1.14216e+06	4.43201e+07	1.08733	7.27223	14.4586	0.739342	rep2	Yes
11	Cluster49031	Peptide	SAPAFIDLDTTLSIFETGIK	683.133	2728.5	2728.5	1.61	4	2.61	0	0.95	iTRAQ8plex[+304.20536] (N-term); iTRAQ8plex[+304.20536] (K20); Glu->pyro-Glu[-18.010565] (T11)	2	3	9.39838e+06	2.85209e+07	0.0180705	6.82616	0.647565	2.2918	rep2	Yes
11	Cluster49031	Peptide	SAPAFIDLDTTLSIFETGIK	916.514	2746.52	2746.51	1.31	3	2.41	0	0.95	iTRAQ8plex[+304.20536] (N-term); iTRAQ8plex[+304.20536] (K20)	2	59	2.39028e+07	5.83997e+08	0.946837	0.042494	0.624055	0.688307	rep2	Yes
12	Cluster48800	Peptide	EHGSTPGYYDGR	673.792	1345.57	1345.57	1.34	2	2.31	0	0.95	Glu->pyro-Glu[-18.010565] (N-term); Delta:H(2)C(2)[+26.01565] (H2)	2	1	2.43958e+07	2.43958e+07	0	0	0	0	rep1	No
12	Cluster48800	Peptide	EHGSTPGYYDGR	689.786	1377.56	1377.56	1.6	2	2.31	0	0.95	Glu->pyro-Glu[-18.010565] (N-term)	2	1	1.22369e+07	1.22369e+07	0	0	0	0	rep2	No
12	Cluster48800	Peptide	EHGSTPGYYDGR	821.89	1641.77	1337.56	10	2	4.5	5.21	0.99		2	24	1.21497e+07	1.40732e+09	0	0	0	0	rep1	No
12	Cluster48800	Peptide	EHGSTPGYYDGR	884.907	1767.8	1463.6	10	2	2.7	1.91	0.95	Acetyl[+42.010565] (T5); Acetyl[+42.010565] (S4); Acetyl[+42.010565] (H2)	2	1	1.03592e+07	1.03592e+07	0	0	0	0	rep1	No
12	Cluster48800	Peptide	EHGSTPGYYDGR	812.882	1623.75	1623.76	2.59	2	2.31	0	0.95	Glu->pyro-Glu[-18.010565] (N-term); iTRAQ8plex[+304.20536] (S4)	2	2	2440304	3.24829e+07	1.61258	0.25179	0.614875	222.548	rep2	Yes
12	Cluster48800	Peptide	EHGSTPGYYDGR	973.988	1945.96	1945.97	2.57	2	2.31	0	0.95	iTRAQ8plex[+304.20536] (N-term); iTRAQ8plex[+304.20536] (S4)	2	2	1.95075e+06	8.36256e+06	1.8	0.337011	0.0140414	2.12706	rep1	Yes
12	Cluster48800	Peptide	EHGSTPGYYDGR	821.888	1641.76	1619.74	2.35	2	2.31	0	0.95	iTRAQ8plex[+304.20536] (N-term)	2	22	4.12421e+06	1.47344e+08	2.11744	0.0751674	0.709228	3.95159	rep2	Yes
12	Cluster48800	Peptide	EHGSTPGYYDGR	821.374	1640.73	1640.74	2.19	2	2.31	0	0.95	iTRAQ8plex[+304.20536] (N-term); Cation:Na[+21.981943] (E1)	2	6	4.72939e+06	3.34092e+07	0.0155764	1.00183	0.661773	147.14	rep2	Yes
12	Cluster48800	Peptide	EHGSTPGYYDGR	834.9	1667.78	1667.79	2.16	2	2.31	0	0.95	iTRAQ8plex[+304.20536] (N-term); Delta:H(2)C(2)[+26.01565] (H2)	2	4	3.1892e+06	3.25477e+07	2.03225	1.30506	51.2677	91.7228	rep2	Yes
12	Cluster48800	Peptide	EHGSTPGYYDGR	825.891	1649.77	1649.77	2.06	2	2.31	0	0.95	Glu->pyro-Glu[-18.010565] (N-term); Delta:H(2)C(2)[+26.01565] (H2); iTRAQ8plex[+304.20536] (S4)	2	2	8.47444e+06	1.5527e+07	2.15717	4.48113	27.6298	91.207	rep1	Yes
12	Cluster48800	Peptide	EHGSTPGYYDGR	980.982	1959.95	1959.95	2.04	2	2.31	0	0.95	iTRAQ8plex[+304.20536] (N-term); iTRAQ8plex[+304.20536] (Y9)	2	3	2.05999e+06	1.41938e+07	1.35307	0.0498734	0.404885	221.507	rep1	Yes
12	Cluster48800	Peptide	EHGSTPGYYDGR	841.889	1681.76	1681.76	1.78	2	2.31	0	0.95	iTRAQ8plex[+304.20536] (N-term); Glu->pyro-Glu[-18.010565] (S4)	2	1	7.06851e+06	7.06851e+06	1.89619	0.0725185	60.2279	673.266	rep2	Yes
12	Cluster48800	Peptide	EVDYLLR	606.349	1210.68	906.481	10	2	3.14	2.54	0.95		2	42	2.83635e+07	7.02544e+09	0	0	0	0	rep2	No
12	Cluster48800	Peptide	EVQECK	695.366	1388.72	1388.72	2.3	2	2.31	0	0.95	iTRAQ8plex[+304.20536] (N-term); iTRAQ8plex[+304.20536] (K6); Methylthio (C5)	2	61	9.72569e+06	7.10177e+08	0.786982	0.363639	24.8072	163.363	rep2	Yes
12	Cluster48800	Peptide	EVQECKTEYPNAFIR	929.161	2784.46	2784.46	2.59	3	2.41	0	0.95	iTRAQ8plex[+304.20536] (N-term); iTRAQ8plex[+304.20536] (K6); iTRAQ8plex[+304.20536] (Y9); Methylthio (C5)	2	2	1.30727e+06	1.0394e+07	1.18376	0.0829137	0.243768	3.18979	rep1	Yes
12	Cluster48800	Peptide	EVQECKTEYPNAFIR	1110.05	2218.08	2218.08	1.8	2	2.31	0	0.95	Acetyl[+42.010565] (N-term); Methylthio (C5); iTRAQ8plex[+304.20536] (K6)	2	1	1.05651e+06	1.05651e+06	1.28873	0.317103	0.734212	0.111752	rep2	Yes
12	Cluster48800	Peptide	EVQECKTEYPNAFIR	1110.05	2218.08	2218.08	1.8	2	2.31	0	0.95	iTRAQ8plex[+304.20536] (N-term); iTRAQ8plex[+304.20536] (K6); Pro->pyro-Glu[+13.979265] (E4); Methylthio (C5)	2	1	2.5025e+06	2.5025e+06	0.0426259	6.09185	0.297012	0.0502671	rep1	Yes
12	Cluster48800	Peptide	EVQECKTEYPNAFIR	1241.14	2480.26	2480.27	1.61	2	2.31	0	0.95	iTRAQ8plex[+304.20536] (N-term); iTRAQ8plex[+304.20536] (K6); Methylthio (C5)	2	14	468459	1.53893e+08	0.955848	4.48605	0.154317	3.18531	rep1	Yes
12	Cluster48800	Peptide	FETLSYLPDLTEVELGK	805.443	2413.31	2257.2	2.53	3	2.41	0	0.95	iTRAQ8plex[+304.20536] (K17)	2	114	1.20371e+06	2148896317	0.0299756	3.53193	0.343272	2.36958	rep1	Yes
12	Cluster48800	Peptide	FETLSYLPDLTEVELGK	862.135	2583.38	2583.39	2.44	3	2.41	0	0.95	iTRAQ8plex[+304.20536] (N-term); iTRAQ8plex[+304.20536] (K17); Cation:Na[+21.981943] (D9)	2	1	1.12436e+06	1.12436e+06	0.907823	6.58691	0.551796	0.117779	rep2	Yes
12	Cluster48800	Peptide	FETLSYLPDLTEVELGK	574.129	2865.6	2865.61	2.44	5	2.61	0	0.95	iTRAQ8plex[+304.20536] (N-term); iTRAQ8plex[+304.20536] (K17); iTRAQ8plex[+304.20536] (T11)	2	26	1.88495e+07	2.21214e+08	2.17022	2.46694	0.435251	2.02681	rep1	Yes
12	Cluster48800	Peptide	FETLSYLPDLTEVELGK	862.135	2583.38	2583.38	1.97	3	2.41	0	0.95	iTRAQ8plex[+304.20536] (N-term); iTRAQ8plex[+304.20536] (K17); Cation:Na[+21.981943] (E12)	2	5	2.5503e+06	2.694e+07	1.461	5.93692	0.344422	0.133691	rep1	Yes
12	Cluster48800	Peptide	FETLSYLPDLTEVELGK	956.205	2865.59	2865.6	1.88	3	2.41	0	0.95	iTRAQ8plex[+304.20536] (N-term); iTRAQ8plex[+304.20536] (K17); iTRAQ8plex[+304.20536] (Y6)	2	13	1.89617e+06	2.53604e+07	1.54885	4.55756	0.389465	0.0422243	rep1	Yes
12	Cluster48800	Peptide	FETLSYLPDLTEVELGK	848.806	2543.39	2542.41	1.42	3	2.41	0	0.95	iTRAQ8plex[+304.20536] (N-term); iTRAQ8plex[+304.20536] (K17); Glu->pyro-Glu[-18.010565] (T11)	2	10	2.82762e+07	141883004	1.14968	7.43796	0.578489	0.166075	rep2	Yes
12	Cluster48800	Peptide	FETLSYLPDLTEVELGK	848.805	2543.39	2543.39	1.42	3	2.41	0	0.95	iTRAQ8plex[+304.20536] (N-term); iTRAQ8plex[+304.20536] (K17); Glu->pyro-Glu[-18.010565] (E12)	2	1	2.22143e+07	2.22143e+07	1.16993	0.061227	0.574453	0.346104	rep2	Yes
12	Cluster48800	Peptide	FETLSYLPDLTEVELGK	848.806	2543.39	2543.4	1.18	3	2.41	0	0.95	iTRAQ8plex[+304.20536] (N-term); iTRAQ8plex[+304.20536] (K17); Glu->pyro-Glu[-18.010565] (T3)	2	1	2.93749e+07	2.93749e+07	0.882294	4.33043	0.405512	1.51936	rep1	Yes
12	Cluster48800	Peptide	FETLSYLPDLTEVELGK	867.462	2599.36	2599.36	1.15	3	2.41	0	0.95	iTRAQ8plex[+304.20536] (N-term); iTRAQ8plex[+304.20536] (K17); Cation:K[+37.955882] (E12)	2	6	8.8617e+06	134897984	1.45447	2.73555	121.822	21.0555	rep1	Yes
12	Cluster48800	Peptide	FETLSYLPDLTEVELGK	1281.71	2561.4	2257.2	0.89	2	2.31	0	0.95	iTRAQ8plex[+304.20536] (N-term); iTRAQ8plex[+304.20536] (K17)	2	257	3.48467e+07	2132278216	1.59043	5.89788	0.277576	2.63708	rep1	Yes
12	Cluster48800	Peptide	FETLSYLPDLTEVELGK	1292.7	2583.39	2583.39	0.77	2	2.31	0	0.95	iTRAQ8plex[+304.20536] (N-term); iTRAQ8plex[+304.20536] (K17); Cation:Na[+21.981943] (E14)	2	2	2.47414e+06	4.21468e+06	1.64513	6.39547	0.3377	0.113093	rep1	Yes
12	Cluster48800	Peptide	FETLSYLPDLTEVELGK	1156.61	2311.21	2283.21	0	2	2.31	0	0.95	Delta:H(2)C(2)[+26.01565] (N-term); iTRAQ8plex[+304.20536] (K17)	2	16	1.49397e+07	8.33307e+07	1.56542	5.33783	0.394009	0.287596	rep1	Yes
12	Cluster48800	Peptide	IIGFDNNR	626.85	1251.69	947.482	10	2	2.78	2.03	0.95		2	15	6.93457e+07	9.7384e+08	0	0	0	0	rep1	No
12	Cluster48800	Peptide	IIGFDNNR	626.85	1251.68	1251.69	2.88	2	2.31	0	0.95	iTRAQ8plex[+304.20536] (N-term)	2	181	7.58474e+06	1108576714	0.589475	0.0395215	28.6748	11.1997	rep2	Yes
12	Cluster48800	Peptide	IIGFDNNR	627.834	1253.65	1253.65	2.71	2	2.31	0	0.95	iTRAQ8plex[+304.20536] (N-term); Deamidated[+0.984016] (N6); Deamidated[+0.984016] (N7)	2	2	6.01288e+06	1.16017e+07	141.186	6.90315	38.5939	13.5996	rep2	Yes
12	Cluster48800	Peptide	IIGFDNNR	618.337	1234.66	1234.66	1.78	2	2.31	0	0.95	iTRAQ8plex[+304.20536] (N-term); Gln->pyro-Glu[-17.026549] (N7)	2	1	1.54653e+07	1.54653e+07	1.18805	0.30485	0.633586	29.6066	rep2	Yes
12	Cluster48800	Peptide	IIGFDNNR	418.563	1252.67	1252.67	1.68	3	2.41	0	0.95	iTRAQ8plex[+304.20536] (N-term); Deamidated[+0.984016] (N7)	2	27	8.03966e+06	1.32579e+08	0.0359121	0.13342	0.574668	1.67737	rep2	Yes
12	Cluster48800	Peptide	IIGFDNNR	627.341	1252.67	1252.67	1.6	2	2.31	0	0.95	iTRAQ8plex[+304.20536] (N-term); Deamidated[+0.984016] (N6)	2	104	1.16598e+06	5.49849e+08	1.91739	0.0779874	0.38038	0.0874356	rep1	Yes
12	Cluster48800	Peptide	KFETLSYLPDLTEVELGK	1100.31	3297.92	3297.91	3.64	3	2.41	0	0.95	iTRAQ8plex[+304.20536] (N-term); iTRAQ8plex[+304.20536] (K1); iTRAQ8plex[+304.20536] (K18); iTRAQ8plex[+304.20536] (Y7)	2	3	316206	1.3867e+06	1.07207	7.1188	0.628084	4.88889	rep2	Yes
12	Cluster48800	Peptide	KFETLSYLPDLTEVELGK	599.747	2993.7	2993.71	3.45	5	2.61	0	0.95	iTRAQ8plex[+304.20536] (N-term); iTRAQ8plex[+304.20536] (K1); iTRAQ8plex[+304.20536] (K18)	2	106	3.38098e+06	9.71885e+08	1.4863	6.06576	0.346141	0.185614	rep1	Yes
12	Cluster48800	Peptide	KFETLSYLPDLTEVELGK	1006.23	3015.68	3015.68	1.99	3	2.41	0	0.95	iTRAQ8plex[+304.20536] (N-term); iTRAQ8plex[+304.20536] (K1); iTRAQ8plex[+304.20536] (K18); Cation:Na[+21.981943] (E3)	2	1	4.12494e+06	4.12494e+06	1.08162	6.69932	0.558884	0.0585047	rep2	Yes
12	Cluster48800	Peptide	KFETLSYLPDLTEVELGK	1006.24	3015.69	3015.68	1.99	3	2.41	0	0.95	iTRAQ8plex[+304.20536] (N-term); iTRAQ8plex[+304.20536] (K1); iTRAQ8plex[+304.20536] (K18); Cation:Na[+21.981943] (E13)	2	3	1.33641e+07	3.41178e+07	1.43356	1.52343	0.384442	1.582	rep1	Yes
12	Cluster48800	Peptide	KFETLSYLPDLTEVELGK	992.903	2975.69	2975.69	1.61	3	2.41	0	0.95	iTRAQ8plex[+304.20536] (N-term); iTRAQ8plex[+304.20536] (K1); iTRAQ8plex[+304.20536] (K18); Glu->pyro-Glu[-18.010565] (E13)	2	1	3.46088e+06	3.46088e+06	0.0253237	3.38604	0.424499	0.100239	rep1	Yes
12	Cluster48800	Peptide	KKFETLSYLPDLTEVELGK	930.518	2788.53	2788.53	1.29	3	2.41	0	0.95	iTRAQ8plex[+304.20536] (N-term); iTRAQ8plex[+304.20536] (K1); iTRAQ8plex[+304.20536] (K2); iTRAQ8plex[+304.20536] (K19)	2	1	2.75009e+07	2.75009e+07	0.0108391	0.0661116	0.678136	0.332368	rep2	Yes
12	Cluster48800	Peptide	LPLFGCTDSAQVLK	613.351	2449.37	2449.38	2.61	4	2.61	0	0.95	iTRAQ8plex[+304.20536] (N-term); iTRAQ8plex[+304.20536] (K14); iTRAQ8plex[+304.20536] (S9); Methylthio (C6)	2	1	629283	629283	1.29495	6.87684	0.531813	19.6608	rep2	Yes
12	Cluster48800	Peptide	LPLFGCTDSAQVLK	725.076	2172.2	2146.19	2.52	3	2.41	0	0.95	iTRAQ8plex[+304.20536] (N-term); iTRAQ8plex[+304.20536] (K14); Methylthio (C6); Deamidated[+0.984016] (Q11)	2	11	8.9164e+06	7.54948e+07	209.07	0.0404514	0.657122	19.4906	rep2	Yes
12	Cluster48800	Peptide	LPLFGCTDSAQVLK	1073.6	2145.17	2145.19	1.86	2	2.31	0	0.95	iTRAQ8plex[+304.20536] (N-term); iTRAQ8plex[+304.20536] (K14); Methylthio (C6)	2	143	1.01687e+07	7.37205e+08	1.93517	7.31031	83.5152	15.6483	rep1	Yes
12	Cluster48800	Peptide	LPLFGCTDSAQVLK	1080.6	2159.19	2159.19	1.85	2	2.31	0	0.95	iTRAQ8plex[+304.20536] (N-term); iTRAQ8plex[+304.20536] (K14); Methylthio (C6); Pro->pyro-Glu[+13.979265] (L13)	2	1	9.99398e+06	9.99398e+06	0.423114	8.47491	0.358635	0.253277	rep1	Yes
12	Cluster48800	Peptide	LPLFGCTDSAQVLK	1080.6	2159.19	2159.19	1.85	2	2.31	0	0.95	iTRAQ8plex[+304.20536] (N-term); iTRAQ8plex[+304.20536] (K14); Pro->pyro-Glu[+13.979265] (L3); Methylthio (C6)	2	1	1.12251e+07	1.12251e+07	4.03058	2.60113	27.4035	0.299683	rep1	Yes
12	Cluster48800	Peptide	LPLFGCTDSAQVLK	710.062	2127.16	2127.17	1.83	3	2.41	0	0.95	iTRAQ8plex[+304.20536] (N-term); iTRAQ8plex[+304.20536] (K14); Methylthio (C6); Glu->pyro-Glu[-18.010565] (S9)	2	1	1.12619e+07	1.12619e+07	0.0273051	0.129904	0.661617	0.519484	rep2	Yes
12	Cluster48800	Peptide	LPLFGCTDSAQVLK	1084.59	2167.16	2167.15	0.92	2	2.31	0	0.95	iTRAQ8plex[+304.20536] (N-term); iTRAQ8plex[+304.20536] (K14); Methylthio (C6); Cation:Na[+21.981943] (D8)	2	2	9.06196e+06	1.46334e+07	5.74343	3.96286	0.679824	1.80641	rep1	Yes
12	Cluster48800	Peptide	QVQCISFIAYKPPSFTGA	1297.68	2593.35	2593.35	1.54	2	2.31	0	0.95	Gln->pyro-Glu[-17.026549] (N-term); Methylthio (C4); iTRAQ8plex[+304.20536] (K11); iTRAQ8plex[+304.20536] (Y10)	2	1	686129	686129	1.50874	7.04296	0.637532	0.176433	rep2	Yes
12	Cluster48800	Peptide	QVQCISFIAYKPPSFTGA	1306.19	2610.37	2610.38	1.53	2	2.31	0	0.95	iTRAQ8plex[+304.20536] (N-term); iTRAQ8plex[+304.20536] (K11); Methylthio (C4)	2	8	1.18749e+07	5.62153e+07	2.67705	9.57615	0.475912	2.7409	rep1	Yes
12	Cluster48800	Peptide	QVQCISFIAYKPPSFTGA	1145.58	2289.15	2289.15	0.87	2	2.31	0	0.95	Gln->pyro-Glu[-17.026549] (N-term); Methylthio (C4); iTRAQ8plex[+304.20536] (K11)	2	2	6.71684e+06	8.00753e+06	0.11953	0.202193	0.690758	33.2673	rep2	Yes
12	Cluster48800	Peptide	TEYPNAFIR	568.791	1135.57	1135.57	1.59	2	2.31	0	0.95	Delta:H(2)C(2)[+26.01565] (N-term)	2	37	2.74821e+07	1.98111e+08	0	0	0	0	rep1	No
12	Cluster48800	Peptide	TEYPNAFIR	707.884	1413.75	1109.55	10	2	3.59	4.09	0.95		2	83	2.12569e+07	9.86461e+09	0	0	0	0	rep1	No
12	Cluster48800	Peptide	TEYPNAFIR	866.991	1731.97	1731.97	3.93	2	2.31	0	0.95	iTRAQ8plex[+304.20536] (N-term); iTRAQ8plex[+304.20536] (Y3); Pro->pyro-Glu[+13.979265] (T1)	2	1	3.23587e+06	3.23587e+06	30.4855	0.141144	0.641109	280.528	rep2	Yes
12	Cluster48800	Peptide	TEYPNAFIR	714.891	1427.77	1427.77	3.78	2	2.31	0	0.95	iTRAQ8plex[+304.20536] (N-term); Pro->pyro-Glu[+13.979265] (T1)	2	1	8.80938e+06	8.80938e+06	0.565743	0.074103	25.7737	9.22195	rep2	Yes
12	Cluster48800	Peptide	TEYPNAFIR	707.884	1413.75	1109.55	3.61	2	2.31	0	0.95	iTRAQ8plex[+304.20536] (N-term)	2	215	2.97383e+07	2504971388	1.41726	0.0483307	32.0623	12.2328	rep1	Yes
12	Cluster48800	Peptide	TEYPNAFIR	859.985	1717.95	1717.96	3.03	2	2.31	0	0.95	iTRAQ8plex[+304.20536] (N-term); iTRAQ8plex[+304.20536] (Y3)	2	103	9.50682e+06	7.65284e+08	0.0158394	0.153968	0.573356	0.0306152	rep2	Yes
12	Cluster48800	Peptide	TEYPNAFIR	708.375	1414.73	1110.54	2.16	2	2.31	0	0.95	iTRAQ8plex[+304.20536] (N-term); Deamidated[+0.984016] (N5)	2	38	1.1286e+07	3.57943e+08	1.17544	0.416583	0.716307	12.0615	rep2	Yes
12	Cluster48800	Peptide	TEYPNAFIR	573.659	1717.95	1717.96	2.1	3	2.41	0	0.95	iTRAQ8plex[+304.20536] (N-term); iTRAQ8plex[+304.20536] (T1)	2	22	1.145e+07	2.69859e+08	1.5204	0.00985177	0.151001	2.2072	rep1	Yes
12	Cluster48800	Peptide	TEYPNAFIR	860.477	1718.94	1718.94	2.09	2	2.31	0	0.95	iTRAQ8plex[+304.20536] (N-term); iTRAQ8plex[+304.20536] (Y3); Deamidated[+0.984016] (N5)	2	13	6.72292e+06	1.06801e+08	1.17267	0.24959	0.673071	12.5516	rep2	Yes
12	Cluster48800	Peptide	VWPPVGK	695.935	1389.85	1085.65	9.5	2	2.87	3.59	0.95	iTRAQ8plex[+304.20536] (K7)	2	58	2.8178e+07	1867091957	1.39785	1.71453	0.149317	1.76404	rep1	Yes
12	Cluster48800	Peptide	VWPPVGK	695.933	1389.85	1389.85	2.73	2	2.31	0	0.95	iTRAQ8plex[+304.20536] (N-term); iTRAQ8plex[+304.20536] (K7)	2	65	1.14726e+07	8.00482e+08	1.02134	0.0428889	0.642507	0.0912526	rep2	Yes
12	Cluster48800	Peptide	VWPPVGKK	520.997	1559.97	1255.76	9.5	3	3.33	3.09	0.95	Acetyl[+42.010565] (K7); iTRAQ8plex[+304.20536] (K8)	2	2	1.23752e+08	1.58414e+08	1.30058	0.0536853	0.372463	0.0212794	rep1	Yes
12	Cluster48800	Peptide	VWPPVGKKK	563.693	1688.06	1383.85	9.5	3	2.63	2.38	0.95	Acetyl[+42.010565] (K8); iTRAQ8plex[+304.20536] (K9)	2	1	3.33882e+06	3.33882e+06	0.0177972	0.0607318	0.364995	18.6811	rep1	Yes
12	Cluster48800	Peptide	YWTMWK	761.916	1521.82	1217.62	10	2	3.09	3.4	0.95	iTRAQ8plex[+304.20536] (K6)	2	10	2.86925e+06	1826998354	0.0099483	0.310247	0.628468	4.83585	rep2	Yes
12	Cluster48800	Peptide	YWTMWK	914.017	1826.02	1826.03	3.94	2	2.31	0	0.95	iTRAQ8plex[+304.20536] (N-term); iTRAQ8plex[+304.20536] (K6); iTRAQ8plex[+304.20536] (Y1)	2	5	1.66076e+06	3.45407e+07	1.08479	0.27665	0.598623	5.03634	rep2	Yes
12	Cluster48800	Peptide	YWTMWK	761.916	1521.82	1521.82	2.63	2	2.31	0	0.95	iTRAQ8plex[+304.20536] (N-term); iTRAQ8plex[+304.20536] (K6)	2	41	8.3061e+06	3.9173e+08	1.19322	0.160576	0.666311	0.232332	rep2	Yes
13	Cluster16975	Peptide	EDQVDDAELLELVELEVR	1209.63	2417.24	2113.04	10	2	6.37	7.11	1		2	16	5.87501e+06	1.95415e+08	0	0	0	0	rep1	No
13	Cluster16975	Peptide	EDQVDDAELLELVELEVR	1209.63	2417.24	2416.24	1.66	2	2.31	0	0.95	iTRAQ8plex[+304.20536] (N-term)	2	29	7.89104e+06	2.36452e+08	0.0406265	4.24731	0.533774	0.0532677	rep1	Yes
13	Cluster16975	Peptide	EHILLAK	716.457	1430.9	1126.7	10	2	3.19	4.57	0.97	iTRAQ8plex[+304.20536] (K7)	2	13	6.17996e+06	6.91203e+08	1.03982	7.00061	34.561	0.0356522	rep2	Yes
13	Cluster16975	Peptide	EHILLAK	729.466	1456.92	1456.92	3.02	2	2.31	0	0.95	iTRAQ8plex[+304.20536] (N-term); iTRAQ8plex[+304.20536] (K7); Delta:H(2)C(2)[+26.01565] (H2)	2	1	6.53409e+06	6.53409e+06	62.8908	6.78783	48.8666	714.555	rep2	Yes
13	Cluster16975	Peptide	EHILLAK	716.457	1430.9	1430.9	2.94	2	2.31	0	0.95	iTRAQ8plex[+304.20536] (N-term); iTRAQ8plex[+304.20536] (K7)	2	19	6.17996e+06	3.1771e+08	1.03982	7.00062	34.5611	0.0356522	rep2	Yes
13	Cluster16975	Peptide	ELLSSYEFNGDDIPIISGSALLAVETLTENPNVK	852.458	4257.25	4257.26	2.23	5	2.61	0	0.95	iTRAQ8plex[+304.20536] (N-term); iTRAQ8plex[+304.20536] (K34); Deamidated[+0.984016] (N9)	2	1	6.71369e+06	6.71369e+06	0.765239	0.16252	0.581362	0.961809	rep2	Yes
13	Cluster16975	Peptide	ELLSSYEFNGDDIPIISGSALLAVETLTENPNVK	1419.76	4256.24	4256.25	2.11	3	2.41	0	0.95	iTRAQ8plex[+304.20536] (N-term); iTRAQ8plex[+304.20536] (K34)	2	4	1.49078e+06	7.07998e+06	0.903669	6.6395	0.64546	0.211269	rep2	Yes
13	Cluster16975	Peptide	FEAIVYVLK	845.519	1689.02	1384.83	10	2	3.63	4.83	0.98	iTRAQ8plex[+304.20536] (K9)	2	6	9.05176e+06	8.71165e+07	0.0118336	0.0566488	0.654256	19.0448	rep2	Yes
13	Cluster16975	Peptide	FEAIVYVLK	665.416	1993.22	1993.23	2.56	3	2.41	0	0.95	iTRAQ8plex[+304.20536] (N-term); iTRAQ8plex[+304.20536] (K9); iTRAQ8plex[+304.20536] (Y6)	2	2	2.03646e+06	3.0035e+06	1.08005	0.120111	64.8838	0.308627	rep2	Yes
13	Cluster16975	Peptide	FEAIVYVLK	845.519	1689.02	1689.03	2.25	2	2.31	0	0.95	iTRAQ8plex[+304.20536] (N-term); iTRAQ8plex[+304.20536] (K9)	2	8	9.05176e+06	5.89887e+07	0.0118337	0.0566488	0.654259	19.0447	rep2	Yes
13	Cluster16975	Peptide	GITINTATVEYETENR	1058.05	2114.08	1809.87	10	2	6.25	7.26	1		2	9	4.60185e+06	4.97119e+08	0	0	0	0	rep2	No
13	Cluster16975	Peptide	GITINTATVEYETENR	807.098	2418.27	2418.28	2.23	3	2.41	0	0.95	iTRAQ8plex[+304.20536] (N-term); iTRAQ8plex[+304.20536] (Y11)	2	4	2.40983e+07	5.73651e+07	1.0492	0.0734203	0.567022	0.032062	rep2	Yes
13	Cluster16975	Peptide	GITINTATVEYETENR	1058.05	2114.08	2114.08	0.95	2	2.31	0	0.95	iTRAQ8plex[+304.20536] (N-term)	2	9	5.77405e+06	1.5448e+08	0.970996	0.357158	0.582881	3.95292	rep2	Yes
13	Cluster16975	Peptide	GITINTATVEYETENR	1058.54	2115.07	2115.07	0.95	2	2.31	0	0.95	iTRAQ8plex[+304.20536] (N-term); Deamidated[+0.984016] (N5)	2	1	1.72171e+07	1.72171e+07	1.84385	1.96921	0.130488	2.84946	rep1	Yes
13	Cluster16975	Peptide	GTVATGR	483.286	964.557	660.356	10	2	2.32	2.04	0.95		2	1	1.19519e+06	1.19519e+06	0	0	0	0	rep2	No
13	Cluster16975	Peptide	GTVATGR	483.286	964.557	964.559	2.9	2	2.31	0	0.95	iTRAQ8plex[+304.20536] (N-term)	2	4	1.19519e+06	2.61378e+07	0.9686	0.408217	0.566672	4.34031	rep2	Yes
13	Cluster16975	Peptide	ILDEALAGDNVGLLLR	854.486	1706.96	1706.96	0.59	2	2.31	0	0.95	Delta:H(2)C(2)[+26.01565] (N-term)	2	22	1.22359e+07	9.23616e+07	0	0	0	0	rep1	No
13	Cluster16975	Peptide	ILDEALAGDNVGLLLR	868.484	1734.95	1734.95	0.58	2	2.31	0	0.95	Formyl[+27.994915] (N-term)	2	3	9.41057e+06	1.39966e+07	0	0	0	0	rep1	No
13	Cluster16975	Peptide	ILDEALAGDNVGLLLR	993.579	1985.14	1680.94	10	2	5.31	6.28	1		2	30	5.9283e+07	5.2388e+08	0	0	0	0	rep1	No
13	Cluster16975	Peptide	ILDEALAGDNVGLLLR	662.719	1985.13	1680.95	2.14	3	2.41	0	0.95	iTRAQ8plex[+304.20536] (N-term)	2	30	1.10358e+07	2.41e+08	1.11131	0.142449	0.629878	0.716027	rep2	Yes
13	Cluster16975	Peptide	ILDEALAGDNVGLLLR	656.718	1967.13	1967.13	1.83	3	2.41	0	0.95	iTRAQ8plex[+304.20536] (N-term); Glu->pyro-Glu[-18.010565] (D9)	2	1	5.85034e+06	5.85034e+06	1.02178	0.148045	0.613912	0.691258	rep2	Yes
13	Cluster16975	Peptide	ILDEALAGDNVGLLLR	670.049	2007.12	2007.13	1.79	3	2.41	0	0.95	iTRAQ8plex[+304.20536] (N-term); Cation:Na[+21.981943] (E4)	2	1	2.90986e+07	2.90986e+07	0.0360061	0.126732	0.57425	0.714928	rep2	Yes
13	Cluster16975	Peptide	IMNDKDEESK	531.044	2120.14	1815.95	10	4	3.23	0.62	0.95	iTRAQ8plex[+304.20536] (K5); iTRAQ8plex[+304.20536] (K10)	2	1	3.67259e+07	3.67259e+07	1.04699	0.427836	0.00376911	285.38	rep2	Yes
13	Cluster16975	Peptide	IMNDKDEESK	921.99	1841.96	1841.97	2.28	2	2.31	0	0.95	Delta:H(2)C(2)[+26.01565] (N-term); iTRAQ8plex[+304.20536] (K5); iTRAQ8plex[+304.20536] (K10)	2	1	2.08601e+06	2.08601e+06	0.0188583	53.4281	0.52941	198.552	rep2	Yes
13	Cluster16975	Peptide	IMNDKDEESK	707.723	2120.14	2120.15	2.26	3	2.41	0	0.95	iTRAQ8plex[+304.20536] (N-term); iTRAQ8plex[+304.20536] (K5); iTRAQ8plex[+304.20536] (K10)	2	1	1.33773e+07	1.33773e+07	0.770277	0.443182	0.59566	293.373	rep2	Yes
13	Cluster16975	Peptide	IYELMDAVDSYIPIPQR	776.41	2326.21	2022.01	10	3	4.74	6.62	1		2	1	2.87495e+07	2.87495e+07	0	0	0	0	rep2	No
13	Cluster16975	Peptide	IYELMDAVDSYIPIPQR	781.743	2342.21	2038.01	10	3	5.48	6.82	1	Oxidation[+15.994915] (M5)	2	8	3.39546e+07	1.47154e+08	0	0	0	0	rep2	No
13	Cluster16975	Peptide	IYELMDAVDSYIPIPQR	1033.02	2064.02	2064.02	0	2	2.31	0	0.95	Delta:H(2)C(2)[+26.01565] (N-term); Oxidation[+15.994915] (M5)	2	14	2.02816e+06	5.12826e+07	0	0	0	0	rep1	No
13	Cluster16975	Peptide	IYELMDAVDSYIPIPQR	1033.02	2064.03	2064.02	0.63	2	4.44	5.53	1	Acetyl[+42.010565] (Y2)	2	4	7.91163e+06	2.84028e+07	0	0	0	0	rep2	No
13	Cluster16975	Peptide	KEEGGR	642.376	1282.74	1282.74	3.59	2	2.31	0	0.95	iTRAQ8plex[+304.20536] (N-term); iTRAQ8plex[+304.20536] (K1)	2	1	2.36597e+06	2.36597e+06	1.02933	6.53096	0.501577	4.13414	rep2	Yes
13	Cluster16975	Peptide	KYDEIDAAPEER	783.432	2347.27	2347.28	2.68	3	2.41	0	0.95	iTRAQ8plex[+304.20536] (N-term); iTRAQ8plex[+304.20536] (K1); iTRAQ8plex[+304.20536] (Y2)	2	2	1.74198e+07	3.99067e+07	1.2462	0.147171	0.32355	2.18264	rep1	Yes
13	Cluster16975	Peptide	KYDEIDAAPEER	1022.54	2043.07	2043.07	1.56	2	2.31	0	0.95	iTRAQ8plex[+304.20536] (N-term); iTRAQ8plex[+304.20536] (K1)	2	28	7.18838e+06	403577839	1.60002	6.2933	73.8567	3.21052	rep1	Yes
13	Cluster16975	Peptide	KYDEIDAAPEER	870.438	1738.87	1738.87	1.24	2	4.3	2.77	0.95	iTRAQ8plex[+304.20536] (K1)	2	1	3.97313e+06	3.97313e+06	1.11055	65.5878	46.6618	124.089	rep2	Yes
13	Cluster16975	Peptide	NYTVTGVEMFQK	1013.05	2024.08	1719.88	10	2	6.04	7.29	1	iTRAQ8plex[+304.20536] (K12)	2	5	1.01429e+07	3.00204e+08	1.05236	0.0490993	0.559973	0.144771	rep2	Yes
13	Cluster16975	Peptide	NYTVTGVEMFQK	777.101	2328.28	2328.29	2.71	3	2.41	0	0.95	iTRAQ8plex[+304.20536] (N-term); iTRAQ8plex[+304.20536] (K12); iTRAQ8plex[+304.20536] (Y2)	2	1	4.87342e+06	4.87342e+06	0.013084	0.153773	0.604402	0.141488	rep2	Yes
13	Cluster16975	Peptide	NYTVTGVEMFQK	1013.05	2024.08	1719.88	2.33	2	2.31	0	0.95	iTRAQ8plex[+304.20536] (N-term); iTRAQ8plex[+304.20536] (K12)	2	4	1.01429e+07	6.55194e+07	1.05236	0.0490992	0.559973	0.14477	rep2	Yes
13	Cluster16975	Peptide	QTELPFLLAVEDVFSITGR	813.785	2438.33	2134.13	10	3	6.22	7.54	1		2	10	1.06619e+07	6.62522e+07	0	0	0	0	rep2	No
13	Cluster16975	Peptide	QTELPFLLAVEDVFSITGR	1059.56	2117.11	2117.11	0	2	2.31	0	0.95	Gln->pyro-Glu[-17.026549] (N-term)	2	1	9.19787e+06	9.19787e+06	0	0	0	0	rep1	No
13	Cluster16975	Peptide	QTELPFLLAVEDVFSITGR	1220.17	2438.33	2438.33	1.64	2	2.31	0	0.95	iTRAQ8plex[+304.20536] (N-term)	2	9	1.82605e+06	4.74365e+07	29.8592	7.4365	0.533992	0.150478	rep2	Yes
13	Cluster16975	Peptide	QVGVPDMVVFLNK	1027.6	2053.18	1748.98	10	2	5.04	6.53	1	iTRAQ8plex[+304.20536] (K13)	2	7	1.5876e+07	1.8115e+08	0.835735	0.0886036	0.586502	0.0667521	rep2	Yes
13	Cluster16975	Peptide	QVGVPDMVVFLNK	1027.6	2053.18	2053.18	1.95	2	2.31	0	0.95	iTRAQ8plex[+304.20536] (N-term); iTRAQ8plex[+304.20536] (K13)	2	3	2.00095e+06	4.89219e+07	1.10956	0.11832	0.612235	0.0724642	rep2	Yes
13	Cluster16975	Peptide	QVGVPDMVVFLNK	866.982	1731.95	1731.95	1.39	2	2.31	0	0.95	Gln->pyro-Glu[-17.026549] (N-term); iTRAQ8plex[+304.20536] (K13)	2	1	6.12624e+06	6.12624e+06	1.16151	0.576411	0.585153	26.0229	rep2	Yes
13	Cluster16975	Peptide	TTDVTGK	513.292	1024.57	1024.57	2.15	2	2.31	0	0.95	iTRAQ8plex[+304.20536] (N-term); iTRAQ8plex[+304.20536] (K7)	2	1	2.03488e+07	2.03488e+07	0.703933	7.57389	0.24493	0.602125	rep2	Yes
13	Cluster16975	Peptide	TTLTAALTMALASMGNSVAK	854.147	2559.42	2255.22	9.5	3	6.39	7.99	1	iTRAQ8plex[+304.20536] (K20)	2	4	2.10802e+07	7.39876e+07	461.251	5.10004	0.679503	0.0058131	rep1	Yes
13	Cluster16975	Peptide	TTLTAALTMALASMGNSVAK	854.474	2560.4	2560.4	1.41	3	2.41	0	0.95	iTRAQ8plex[+304.20536] (N-term); iTRAQ8plex[+304.20536] (K20); Deamidated[+0.984016] (N16)	2	3	8.75516e+06	3.15366e+07	0.0124051	6.86161	0.401561	0.152701	rep1	Yes
13	Cluster16975	Peptide	TTLTAALTMALASMGNSVAK	854.147	2559.42	2559.42	1.41	3	2.41	0	0.95	iTRAQ8plex[+304.20536] (N-term); iTRAQ8plex[+304.20536] (K20)	2	3	1.33806e+07	3.26327e+07	1.23423	0.0521416	57.739	0.106832	rep1	Yes
13	Cluster16975	Peptide	TVGAGVIQSIIE	745.939	1489.86	1185.66	10	2	3.06	4.56	0.97		2	4	7.42952e+06	2.95166e+07	0	0	0	0	rep1	No
13	Cluster16975	Peptide	TVGAGVIQSIIE	898.04	1794.06	1794.07	2.23	2	2.31	0	0.95	iTRAQ8plex[+304.20536] (N-term); iTRAQ8plex[+304.20536] (S9)	2	1	1.35592e+07	1.35592e+07	1.29662	0.180311	0.594678	7.2747	rep2	Yes
13	Cluster16975	Peptide	TVGAGVIQSIIE	745.938	1489.86	1489.85	0	2	2.31	0	0.95	iTRAQ8plex[+304.20536] (N-term)	2	16	2.66901e+06	1.01262e+08	2.14967	1.79576	0.276837	7.81056	rep1	Yes
13	Cluster16975	Peptide	VGETVDLVGLR	487.956	1460.85	1156.65	10	3	4	5.99	1		2	7	5.48819e+07	9.76489e+08	0	0	0	0	rep1	No
13	Cluster16975	Peptide	VGETVDLVGLR	592.34	1182.66	1182.66	2.2	2	2.31	0	0.95	Delta:H(2)C(2)[+26.01565] (N-term)	2	2	3.44841e+06	9.78281e+06	0	0	0	0	rep2	No
13	Cluster16975	Peptide	VGETVDLVGLR	599.345	1196.67	1196.68	2.01	2	2.31	0	0.95	iTRAQ8plex[+304.20536] (N-term)	2	23	2.57294e+07	1.80319e+08	0.0305211	0.545954	0.640683	49.1904	rep2	Yes
13	Cluster16975	Peptide	YDEIDAAPEER	806.392	1610.77	1306.57	10	2	4.53	5.3	0.99		2	2	5.31945e+07	1.16556e+08	0	0	0	0	rep2	No
13	Cluster16975	Peptide	YDEIDAAPEER	639.33	1914.97	1914.97	1.57	3	2.41	0	0.95	iTRAQ8plex[+304.20536] (N-term); iTRAQ8plex[+304.20536] (Y1)	2	2	2.72508e+07	5.02795e+07	1.4543	1.75483	0.130057	2.79912	rep1	Yes
14	Cluster16489	Peptide	AAIPTIK	661.433	1320.85	1016.65	10	2	2.82	2.8	0.95	iTRAQ8plex[+304.20536] (K7)	2	7	4.22968e+08	1803513971	108.992	0.045589	0.745358	0.00722425	rep2	Yes
14	Cluster16489	Peptide	AAIPTIK	661.431	1320.85	1320.85	3.03	2	2.31	0	0.95	iTRAQ8plex[+304.20536] (N-term); iTRAQ8plex[+304.20536] (K7)	2	2	1.19302e+07	3.03351e+07	1.28757	0.071828	58.2055	3.4518	rep2	Yes
14	Cluster16489	Peptide	ADDCIGPEVESLVASLPEGGVLLLENVR	811.923	3243.66	3243.67	1.36	4	2.61	0	0.95	iTRAQ8plex[+304.20536] (N-term); Methylthio (C4)	2	3	1.33398e+07	2.37456e+07	0.0377413	0.207396	0.718512	0.819054	rep2	Yes
14	Cluster16489	Peptide	ADLNVPLDDNQTITDDTR	1021.49	2040.96	2040.96	0.98	2	2.31	0	0.95	Delta:H(2)C(2)[+26.01565] (N-term)	2	6	2.19626e+06	7.84009e+06	0	0	0	0	rep1	No
14	Cluster16489	Peptide	ADLNVPLDDNQTITDDTR	1160.58	2319.15	2014.94	10	2	5.21	5.92	1		2	18	3.4939e+07	4.11771e+08	0	0	0	0	rep1	No
14	Cluster16489	Peptide	ADLNVPLDDNQTITDDTR	1151.58	2301.15	2301.15	0.87	2	2.31	0	0.95	iTRAQ8plex[+304.20536] (N-term); Glu->pyro-Glu[-18.010565] (T12)	2	1	4.29562e+06	4.29562e+06	1.13258	0.37133	0.640855	3.4571	rep2	Yes
14	Cluster16489	Peptide	AQGLSVGSSLVEEDKLELATSLLAK	868.254	3468.99	3468.99	1.96	4	2.61	0	0.95	iTRAQ8plex[+304.20536] (N-term); iTRAQ8plex[+304.20536] (K15); iTRAQ8plex[+304.20536] (K25)	2	220	799154	3.32201e+08	1.06389	8.03971	0.80837	3.82212	rep2	Yes
14	Cluster16489	Peptide	EEEKNDPEFAK	750.075	2247.2	2247.21	2.27	3	2.41	0	0.95	iTRAQ8plex[+304.20536] (N-term); iTRAQ8plex[+304.20536] (K4); iTRAQ8plex[+304.20536] (K11)	2	1	7.83427e+06	7.83427e+06	0.0107912	5.70499	0.748676	2.65361	rep2	Yes
14	Cluster16489	Peptide	ELDYLVGAVSNPK	1007.07	2012.13	1707.93	10	2	4.93	5.95	1	iTRAQ8plex[+304.20536] (K13)	2	4	1.07914e+07	1.74173e+08	1.12665	0.103664	0.820631	0.0663418	rep2	Yes
14	Cluster16489	Peptide	ELDYLVGAVSNPK	1007.08	2012.13	2012.13	0.99	2	2.31	0	0.95	iTRAQ8plex[+304.20536] (N-term); iTRAQ8plex[+304.20536] (K13)	2	3	1.30414e+07	2.69446e+07	1.66874	2.90163	0.382774	1.65224	rep1	Yes
14	Cluster16489	Peptide	FAAGTEAIANK	850.993	1699.96	1395.77	10	2	4.9	6.04	1	iTRAQ8plex[+304.20536] (K11)	2	10	7.47595e+06	1068378029	0.997783	0.111788	0.702087	0.025049	rep2	Yes
14	Cluster16489	Peptide	FAAGTEAIANK	850.993	1699.97	1381.75	3.18	2	2.31	0	0.95	iTRAQ8plex[+304.20536] (N-term); iTRAQ8plex[+304.20536] (K11)	2	11	7.47595e+06	2.13666e+08	0.997784	0.111787	0.70209	0.0250491	rep2	Yes
14	Cluster16489	Peptide	FAAGTEAIANK	704.889	1407.76	1407.77	1.7	2	2.31	0	0.95	Delta:H(2)C(2)[+26.01565] (N-term); iTRAQ8plex[+304.20536] (K11)	2	2	2.9691e+07	4.56908e+07	1.68718	0.423318	0.604814	18.766	rep2	Yes
14	Cluster16489	Peptide	FAPDANSK	729.412	1456.81	1152.61	9.5	2	3.2	3.29	0.95	iTRAQ8plex[+304.20536] (K8)	2	2	3.29197e+08	3.39454e+08	1.47036	4.71236	0.307954	0.152523	rep1	Yes
14	Cluster16489	Peptide	FAPDANSK	729.903	1457.79	1457.79	2.74	2	2.31	0	0.95	iTRAQ8plex[+304.20536] (N-term); iTRAQ8plex[+304.20536] (K8); Deamidated[+0.984016] (N6)	2	1	5.54869e+06	5.54869e+06	62.6262	0.117238	57.3652	194.027	rep2	Yes
14	Cluster16489	Peptide	FAPDANSK	577.309	1152.6	1152.6	2.08	2	2.31	0	0.95	iTRAQ8plex[+304.20536] (N-term); iTRAQ8plex[+304.20536] (K8)	2	2	1.02573e+07	2.46841e+07	0.478021	5.72842	17.8191	18.2457	rep2	Yes
14	Cluster16489	Peptide	FLKPSVAGFLLQK	787.496	2359.46	2055.27	10	3	4.69	7.26	1	iTRAQ8plex[+304.20536] (K3); iTRAQ8plex[+304.20536] (K13)	2	8	3.1152e+06	5.42351e+07	87.8161	0.0913014	0.771151	0.20979	rep2	Yes
14	Cluster16489	Peptide	FLKPSVAGFLLQK	694.766	2081.27	2081.28	2.88	3	2.41	0	0.95	Delta:H(2)C(2)[+26.01565] (N-term); iTRAQ8plex[+304.20536] (K3); iTRAQ8plex[+304.20536] (K13)	2	3	1.78512e+07	3.8994e+07	0.0108099	0.0508217	0.769546	0.508712	rep2	Yes
14	Cluster16489	Peptide	FLKPSVAGFLLQK	787.493	2359.46	2359.46	2.54	3	2.41	0	0.95	iTRAQ8plex[+304.20536] (N-term); iTRAQ8plex[+304.20536] (K3); iTRAQ8plex[+304.20536] (K13)	2	3	3.15391e+06	9.30338e+06	0.878081	0.108419	0.779126	0.208432	rep2	Yes
14	Cluster16489	Peptide	FSLAPLVPR	513.311	1024.61	1024.61	2.15	2	2.31	0	0.95	Delta:H(2)C(2)[+26.01565] (N-term)	2	2	8.35204e+06	1.42877e+07	0	0	0	0	rep2	No
14	Cluster16489	Peptide	FSLAPLVPR	652.404	1302.79	998.591	10	2	3.1	3.06	0.95		2	22	1.09676e+09	1.81504e+09	0	0	0	0	rep1	No
14	Cluster16489	Peptide	FSLAPLVPR	804.505	1606.99	1607	2.99	2	2.31	0	0.95	iTRAQ8plex[+304.20536] (N-term); iTRAQ8plex[+304.20536] (S2)	2	4	3.8479e+06	6.46018e+07	1.07422	2.16419	0.705927	12.1264	rep2	Yes
14	Cluster16489	Peptide	FSLAPLVPR	652.405	1302.79	1302.79	2	2	2.31	0	0.95	iTRAQ8plex[+304.20536] (N-term)	2	17	3.10759e+07	175935066	1.03269	8.8849	0.211917	1.79815	rep1	Yes
14	Cluster16489	Peptide	FYKEEEK	943.04	1884.07	1579.87	10	2	3.02	2.75	0.95	iTRAQ8plex[+304.20536] (K3); iTRAQ8plex[+304.20536] (K7)	2	1	2.04329e+06	2.04329e+06	1.75345	7.9669	0.758352	4.11097	rep2	Yes
14	Cluster16489	Peptide	FYKEEEK	943.04	1884.07	1884.07	2.97	2	2.31	0	0.95	iTRAQ8plex[+304.20536] (N-term); iTRAQ8plex[+304.20536] (K3); iTRAQ8plex[+304.20536] (K7)	2	1	2.04329e+06	2.04329e+06	1.75347	7.96689	0.758352	4.11096	rep2	Yes
14	Cluster16489	Peptide	FYKEEEKNDPEFAK	997.217	2988.63	2685.4	4.47	3	2.41	0	0.95	iTRAQ8plex[+304.20536] (N-term); iTRAQ8plex[+304.20536] (K3); iTRAQ8plex[+304.20536] (K7); iTRAQ8plex[+304.20536] (K14)	2	3	3.44515e+06	1.60755e+07	1.00051	5.80958	31.1439	3.2279	rep2	Yes
14	Cluster16489	Peptide	GVSLLLPTDVVVADK	1067.65	2133.28	1829.08	10	2	6.1	7.27	1	iTRAQ8plex[+304.20536] (K15)	2	19	3.04995e+07	9.76076e+08	0.977938	0.0860014	0.773042	0.0160174	rep2	Yes
14	Cluster16489	Peptide	GVSLLLPTDVVVADK	534.327	2133.28	2133.29	3.65	4	3.17	0.78	0.95	iTRAQ8plex[+304.20536] (N-term); iTRAQ8plex[+304.20536] (K15)	2	15	2.02228e+07	157134126	0.920287	7.44049	0.756284	5.329	rep2	Yes
14	Cluster16489	Peptide	GVSLLLPTDVVVADK	488.502	2437.47	2437.48	3.08	5	2.61	0	0.95	iTRAQ8plex[+304.20536] (N-term); iTRAQ8plex[+304.20536] (K15); iTRAQ8plex[+304.20536] (T8)	2	1	2.79923e+07	2.79923e+07	0.987735	0.356909	0.730135	9.24628	rep2	Yes
14	Cluster16489	Peptide	GVSLLLPTDVVVADK	813.501	2437.48	2437.48	2.09	3	2.41	0	0.95	iTRAQ8plex[+304.20536] (N-term); iTRAQ8plex[+304.20536] (K15); iTRAQ8plex[+304.20536] (S3)	2	1	2.66137e+07	2.66137e+07	1.14368	0.1214	0.685759	0.0578385	rep2	Yes
14	Cluster16489	Peptide	GVTPKFSLAPLVPR	596.033	1785.08	1785.08	2.35	3	2.41	0	0.95	iTRAQ8plex[+304.20536] (N-term); iTRAQ8plex[+304.20536] (K5)	2	1	1.45972e+07	1.45972e+07	0.852144	2.95274	63.1062	64.8081	rep1	Yes
14	Cluster16489	Peptide	IGVIESLLEK	855.034	1708.05	1403.85	9.5	2	4.91	5.74	1	iTRAQ8plex[+304.20536] (K10)	2	17	1.92307e+07	4.64204e+08	1.01128	3.31324	0.356394	31.9329	rep1	Yes
14	Cluster16489	Peptide	IGVIESLLEK	577.684	1730.03	1730.03	2.95	3	2.41	0	0.95	iTRAQ8plex[+304.20536] (N-term); iTRAQ8plex[+304.20536] (K10); Cation:Na[+21.981943] (E5)	2	3	5.44195e+06	1.78811e+07	0.912852	0.130188	32.7784	0.242738	rep2	Yes
14	Cluster16489	Peptide	IGVIESLLEK	575.03	1722.07	1722.07	2.79	3	2.41	0	0.95	iTRAQ8plex[+304.20536] (N-term); iTRAQ8plex[+304.20536] (K10); Pro->pyro-Glu[+13.979265] (E9)	2	1	2.78155e+06	2.78155e+06	72.6292	0.0407507	0.584124	10.4212	rep2	Yes
14	Cluster16489	Peptide	IGVIESLLEK	855.033	1708.05	1443.89	2.77	2	2.31	0	0.95	iTRAQ8plex[+304.20536] (N-term); iTRAQ8plex[+304.20536] (K10)	2	44	5.68073e+06	3.0742e+08	0.86858	0.0553847	0.75412	0.1277	rep2	Yes
14	Cluster16489	Peptide	IGVIESLLEK	577.684	1730.03	1730.03	2.77	3	2.41	0	0.95	iTRAQ8plex[+304.20536] (N-term); iTRAQ8plex[+304.20536] (K10); Cation:Na[+21.981943] (E9)	2	4	1.5656e+07	5.26751e+07	0.00420851	0.030085	1.04954	2.79449	rep1	Yes
14	Cluster16489	Peptide	IGVIESLLEK	504.069	2012.24	2012.25	2.58	4	2.61	0	0.95	iTRAQ8plex[+304.20536] (N-term); iTRAQ8plex[+304.20536] (K10); iTRAQ8plex[+304.20536] (S6)	2	1	1.94346e+06	1.94346e+06	1.15483	7.80014	0.640509	4.19442	rep2	Yes
14	Cluster16489	Peptide	KSVGDLTSADLK	628.702	1883.09	1578.88	9.5	3	4.66	2.61	0.95	Acetyl[+42.010565] (S2); iTRAQ8plex[+304.20536] (K12)	2	1	3.33497e+07	3.33497e+07	1.95665	0.808044	0.128288	0.44156	rep1	Yes
14	Cluster16489	Peptide	KSVGDLTSADLK	907.498	1812.98	1812.98	1.77	2	2.31	0	0.95	iTRAQ8plex[+304.20536] (N-term); iTRAQ8plex[+304.20536] (K1); iTRAQ8plex[+304.20536] (K12)	2	1	1.28219e+07	1.28219e+07	77.4564	0.101202	45.1221	4.14027	rep2	Yes
14	Cluster16489	Peptide	LAELSEK	568.019	1701.04	1701.04	3	3	2.41	0	0.95	iTRAQ8plex[+304.20536] (N-term); iTRAQ8plex[+304.20536] (K7); iTRAQ8plex[+304.20536] (S5)	2	1	1.362e+07	1.362e+07	115.376	0.054013	0.682078	0.0423253	rep2	Yes
14	Cluster16489	Peptide	LASLADLYVNDAFGTAHR	654.004	1958.99	1958.99	2.76	3	2.42	0	0.95	Delta:H(2)C(2)[+26.01565] (N-term)	2	2	8.70789e+06	2.38349e+07	0	0	0	0	rep2	No
14	Cluster16489	Peptide	LASLADLYVNDAFGTAHR	746.731	2237.17	1932.97	10	3	4.74	5.87	1		2	7	8.17328e+06	3.73977e+07	0	0	0	0	rep2	No
14	Cluster16489	Peptide	LASLADLYVNDAFGTAHR	747.059	2238.15	2238.16	2.68	3	2.41	0	0.95	iTRAQ8plex[+304.20536] (N-term); Deamidated[+0.984016] (N10)	2	8	3.35254e+06	9.99336e+07	1.06943	0.431791	0.663715	0.579542	rep2	Yes
14	Cluster16489	Peptide	LASLADLYVNDAFGTAHR	746.731	2237.17	2337.19	2.57	3	2.41	0	0.95	iTRAQ8plex[+304.20536] (N-term)	2	12	8.17328e+06	6.30114e+07	0.0283242	0.180454	0.645526	0.498704	rep2	Yes
14	Cluster16489	Peptide	LSELLGIEVK	855.034	1708.05	1403.85	10	2	4.92	6.31	1	iTRAQ8plex[+304.20536] (K10)	2	30	1.26906e+07	1599831815	0.988036	0.0473203	0.760451	0.104126	rep2	Yes
14	Cluster16489	Peptide	LSELLGIEVK	855.034	1708.05	1403.85	2.85	2	2.31	0	0.95	iTRAQ8plex[+304.20536] (N-term); iTRAQ8plex[+304.20536] (K10)	2	44	1.26906e+07	4.26141e+08	0.988036	0.0473204	0.760453	0.104126	rep2	Yes
14	Cluster16489	Peptide	LSELLGIEVK	671.761	2012.26	2012.26	2.68	3	2.41	0	0.95	iTRAQ8plex[+304.20536] (N-term); iTRAQ8plex[+304.20536] (K10); iTRAQ8plex[+304.20536] (S2)	2	2	7.66169e+06	8.11998e+06	0.990989	0.156845	48.424	0.153202	rep2	Yes
14	Cluster16489	Peptide	LSELLGIEVK	866.024	1730.03	1730.04	2.31	2	2.31	0	0.95	iTRAQ8plex[+304.20536] (N-term); iTRAQ8plex[+304.20536] (K10); Cation:Na[+21.981943] (E8)	2	3	5.84094e+06	4.44323e+07	0.0101166	0.173365	0.660507	30.2344	rep2	Yes
14	Cluster16489	Peptide	LSELLGIEVKK	627.065	1878.16	1573.96	10	3	5.07	4.88	1	Acetyl[+42.010565] (K10); iTRAQ8plex[+304.20536] (K11)	2	1	5.5588e+06	5.5588e+06	1.05186	0.063677	75.107	0.170586	rep2	Yes
14	Cluster16489	Peptide	LSELLGIEVKK	627.065	1878.17	1878.17	2.4	3	2.41	0	0.95	iTRAQ8plex[+304.20536] (N-term); iTRAQ8plex[+304.20536] (K10); iTRAQ8plex[+304.20536] (K11)	2	1	5.55879e+06	5.55879e+06	1.05187	0.0636767	75.1076	0.170586	rep2	Yes
14	Cluster16489	Peptide	NDPEFAK	562.796	1123.58	1123.58	4.07	2	2.5	3.73	0.95	iTRAQ8plex[+304.20536] (K7)	2	3	4.32961e+07	3.61215e+08	0.896095	5.3425	34.8059	8.34674	rep2	Yes
14	Cluster16489	Peptide	RPFAAIVGGSK	571.021	1710.03	1405.83	10	3	4.76	6.32	1	iTRAQ8plex[+304.20536] (K11)	2	24	3.69816e+08	1010111742	0.972683	6.10937	0.852167	0.0119746	rep2	Yes
14	Cluster16489	Peptide	RPFAAIVGGSK	856.024	1710.03	1710.03	2.57	2	2.31	0	0.95	iTRAQ8plex[+304.20536] (N-term); iTRAQ8plex[+304.20536] (K11)	2	17	1.44355e+07	2.20206e+08	1.20749	3.79381	0.382966	2.09239	rep1	Yes
14	Cluster16489	Peptide	SVGDLTSADLK	857.492	1712.97	1408.77	10	2	4.59	5.04	0.99	iTRAQ8plex[+304.20536] (K11)	2	16	2.17711e+07	1101177313	1.10804	0.108557	0.768675	0.0060288	rep2	Yes
14	Cluster16489	Peptide	SVGDLTSADLK	857.492	1712.97	1712.98	2.34	2	2.31	0	0.95	iTRAQ8plex[+304.20536] (N-term); iTRAQ8plex[+304.20536] (K11)	2	12	2.17711e+07	1.77351e+08	1.10804	0.108557	0.768675	0.00602877	rep2	Yes
14	Cluster16489	Peptide	SVGDLTSADLK	1009.59	2017.17	2017.18	1.98	2	2.31	0	0.95	iTRAQ8plex[+304.20536] (N-term); iTRAQ8plex[+304.20536] (K11); iTRAQ8plex[+304.20536] (S1)	2	1	959292	959292	1.03554	0.328253	0.751802	3.25275	rep2	Yes
14	Cluster16489	Peptide	SVGDLTSADLK	1009.6	2017.17	2017.18	1.98	2	2.31	0	0.95	iTRAQ8plex[+304.20536] (N-term); iTRAQ8plex[+304.20536] (K11); iTRAQ8plex[+304.20536] (S7)	2	1	1.28732e+06	1.28732e+06	0.771074	0.74084	0.713898	179.539	rep2	Yes
14	Cluster16489	Peptide	SVGDLTSADLKGK	647.71	1940.11	1635.9	9.5	3	4.55	4.02	0.99	Acetyl[+42.010565] (K11); iTRAQ8plex[+304.20536] (K13)	2	1	4.37491e+07	4.37491e+07	1.17821	2.88186	0.562858	2.72174	rep1	Yes
14	Cluster16489	Peptide	TFNEALDTTQTVIWNGPMGVFEMEK	1156.25	3465.73	3161.54	9.5	3	6.49	6.57	1	iTRAQ8plex[+304.20536] (K25)	2	3	9.34257e+06	5.65829e+07	1.20544	0.0904471	18.2737	15.7756	rep1	Yes
14	Cluster16489	Peptide	TFNEALDTTQTVIWNGPMGVFEMEK	867.438	3465.72	3465.73	1.38	4	2.61	0	0.95	iTRAQ8plex[+304.20536] (N-term); iTRAQ8plex[+304.20536] (K25)	2	4	1.89696e+07	6.62252e+07	0.894437	0.105781	0.58626	0.0301469	rep2	Yes
14	Cluster16489	Peptide	TFNEALDTTQTVIWNGPMGVFEMEK	1156.58	3466.71	3466.71	0.87	3	2.41	0	0.95	iTRAQ8plex[+304.20536] (N-term); iTRAQ8plex[+304.20536] (K25); Deamidated[+0.984016] (N15)	2	5	2.08885e+07	1.21854e+08	2.35717	7.94021	94.5781	35.0243	rep1	Yes
14	Cluster16489	Peptide	VILSTHLGRPK	610.39	1828.14	1523.95	9.5	3	4.63	5.46	1	iTRAQ8plex[+304.20536] (K11)	2	4	2.57959e+07	8.49711e+07	2.06832	3.33569	27.5173	1.98036	rep1	Yes
14	Cluster16489	Peptide	VILSTHLGRPK	610.39	1828.15	1828.15	2.63	3	2.41	0	0.95	iTRAQ8plex[+304.20536] (N-term); iTRAQ8plex[+304.20536] (K11)	2	2	2.57959e+07	3.50734e+07	2.06832	3.33568	27.5174	1.98036	rep1	Yes
14	Cluster16489	Peptide	VILSTHLGRPK	711.791	2132.35	2132.35	2.53	3	2.41	0	0.95	iTRAQ8plex[+304.20536] (N-term); iTRAQ8plex[+304.20536] (K11); iTRAQ8plex[+304.20536] (S4)	2	1	2.30402e+07	2.30402e+07	1.53068	3.29199	0.36595	1.68452	rep1	Yes
14	Cluster16489	Peptide	VLPGVIALDEAITVTV	957.576	1913.14	1608.93	10	2	3.55	5.27	0.99		2	2	9.46888e+06	1.15904e+07	0	0	0	0	rep1	No
14	Cluster16489	Peptide	VLPGVIALDEAITVTV	957.565	1913.11	1883.13	0	2	2.31	0	0.95	iTRAQ8plex[+304.20536] (N-term)	2	2	1.3421e+07	1.77681e+07	0.140136	17.8529	0.772937	27.6182	rep2	Yes
14	Cluster16489	Peptide	VVPASGIEDGWMGLDIGPDSIK	955.514	2863.52	2559.32	10	3	5.29	7.29	1	iTRAQ8plex[+304.20536] (K22)	2	5	9.26253e+07	2.11629e+08	0.909966	0.094144	67.8837	0.0242022	rep2	Yes
14	Cluster16489	Peptide	VVPASGIEDGWMGLDIGPDSIK	1432.76	2863.51	2863.51	0.7	2	2.31	0	0.95	iTRAQ8plex[+304.20536] (N-term); iTRAQ8plex[+304.20536] (K22)	2	1	2.24176e+06	2.24176e+06	0.953288	0.0939518	0.709301	0.0752607	rep2	Yes
14	Cluster16489	Peptide	YLIENGAK	911.044	1820.07	1820.08	2.53	2	2.31	0	0.95	iTRAQ8plex[+304.20536] (N-term); iTRAQ8plex[+304.20536] (K8); iTRAQ8plex[+304.20536] (Y1); Deamidated[+0.984016] (N5)	2	1	7.3164e+06	7.3164e+06	1.0659	0.077741	54.6876	3.84605	rep2	Yes
14	Cluster16489	Peptide	YLIENGAK	758.94	1515.86	1515.87	2.51	2	2.31	0	0.95	iTRAQ8plex[+304.20536] (N-term); iTRAQ8plex[+304.20536] (K8); Deamidated[+0.984016] (N5)	2	1	7.60563e+06	7.60563e+06	83.8747	0.2575	0.779158	4.64435	rep2	Yes
15	Cluster20392	Peptide	ASSVAQVVTSLQER	889.998	1777.98	1473.78	10	2	6.01	6.24	1		2	24	2.73715e+07	1.20538e+09	0	0	0	0	rep2	No
15	Cluster20392	Peptide	ATGKIAQIPVSEAYLGR	693.399	2077.18	1772.98	10	3	3.76	3.02	0.95		2	1	9.81857e+06	9.81857e+06	0	0	0	0	rep2	No
15	Cluster20392	Peptide	EAYPGDVFYLHSR	619.984	1856.93	1552.73	10	3	4.64	5.83	1		2	25	3.16013e+07	7.58895e+08	0	0	0	0	rep1	No
15	Cluster20392	Peptide	EAYPGDVFYLHSR	790.381	1578.75	1578.75	2.66	2	2.31	0	0.95	Delta:H(2)C(2)[+26.01565] (N-term)	2	5	1.55388e+07	5.89524e+07	0	0	0	0	rep2	No
15	Cluster20392	Peptide	EGIKEQLER	724.41	1446.8	1142.59	10	2	3.2	2.57	0.95	Acetyl[+42.010565] (K4)	2	1	5.87448e+06	5.87448e+06	0	0	0	0	rep1	No
15	Cluster20392	Peptide	EGIKEQLER	855.501	1708.98	1404.79	10	2	3.53	4.29	0.95	iTRAQ8plex[+304.20536] (K4)	2	5	9.08568e+06	3.94515e+07	0.987723	0.205513	0.715144	2.4577	rep2	Yes
15	Cluster20392	Peptide	EGIKEQLER	855.501	1708.99	1444.82	2.91	2	2.31	0	0.95	iTRAQ8plex[+304.20536] (N-term); iTRAQ8plex[+304.20536] (K4)	2	15	9.08568e+06	2.0004e+08	0.987721	0.205513	0.715144	2.4577	rep2	Yes
15	Cluster20392	Peptide	EGIKEQLER	716.408	1430.8	1430.81	2.1	2	2.31	0	0.95	Delta:H(2)C(2)[+26.01565] (N-term); iTRAQ8plex[+304.20536] (K4)	2	6	2.42288e+07	1.17339e+08	1.3059	5.19643	0.0498741	2.14703	rep1	Yes
15	Cluster20392	Peptide	FLLQEK	693.431	1384.85	1384.85	2.89	2	2.31	0	0.95	iTRAQ8plex[+304.20536] (N-term); iTRAQ8plex[+304.20536] (K6)	2	7	2.88628e+07	1.0103e+08	0.853632	0.233089	0.663007	33.1824	rep2	Yes
15	Cluster20392	Peptide	GKISASESR	640.863	1279.71	975.499	10	2	2.85	2.18	0.95	Acetyl[+42.010565] (K2)	2	1	1.31182e+07	1.31182e+07	0	0	0	0	rep1	No
15	Cluster20392	Peptide	IAQIPVSEAYLGR	860.998	1719.98	1415.78	10	2	4.13	4.46	0.96		2	20	4.90665e+08	1.3049e+09	0	0	0	0	rep1	No
15	Cluster20392	Peptide	KFLVQLR	756.494	1510.97	1510.97	3.71	2	2.31	0	0.95	iTRAQ8plex[+304.20536] (N-term); iTRAQ8plex[+304.20536] (K1)	2	4	1.36264e+07	7.56066e+07	0.980239	0.16565	0.735222	0.0142503	rep2	Yes
15	Cluster20392	Peptide	LELAQFAELEAFSQFSSDLDK	999.527	2995.56	2691.36	10	3	5.71	6.48	1	iTRAQ8plex[+304.20536] (K21)	2	9	5.08019e+06	3.48678e+07	0.959364	0.217366	0.714147	1.17673	rep2	Yes
15	Cluster20392	Peptide	LELAQFAELEAFSQFSSDLDK	999.527	2995.56	2994.55	1.8	3	2.41	0	0.95	iTRAQ8plex[+304.20536] (N-term); iTRAQ8plex[+304.20536] (K21)	2	12	2.064e+06	6.94074e+07	0.984558	5.90935	0.65724	1.33066	rep2	Yes
15	Cluster20392	Peptide	LIESPAPGIISR	519.648	1555.92	1251.72	10	3	3.72	6.16	1		2	10	4.66679e+08	1.76842e+09	0	0	0	0	rep1	No
15	Cluster20392	Peptide	QMSLLLR	582.855	1163.7	859.495	10	2	2.92	3.21	0.95		2	3	4.10488e+07	5.67429e+08	0	0	0	0	rep2	No
15	Cluster20392	Peptide	SVYEPLQTGLIAIDSMIPIGR	865.143	2592.41	2288.21	10	3	5.11	7	1	Oxidation[+15.994915] (M16)	2	27	1.41953e+07	6.96504e+08	0	0	0	0	rep2	No
15	Cluster20392	Peptide	SVYEPLQTGLIAIDSMIPIGR	1289.22	2576.42	2272.21	10	2	6.72	7.55	1		2	14	1.7589e+07	6.67413e+08	0	0	0	0	rep1	No
15	Cluster20392	Peptide	TLTAEAESFLK	909.526	1817.04	1512.83	10	2	5.68	7.15	1	iTRAQ8plex[+304.20536] (K11)	2	29	4796392	3132607634	0.906823	0.160407	0.764264	0.18968	rep2	Yes
15	Cluster20392	Peptide	TLTAEAESFLK	611.357	1831.05	1831.05	2.79	3	2.41	0	0.95	iTRAQ8plex[+304.20536] (N-term); iTRAQ8plex[+304.20536] (K11); Pro->pyro-Glu[+13.979265] (L10)	2	1	2.03644e+07	2.03644e+07	40.961	0.0845523	0.600717	297.899	rep2	Yes
15	Cluster20392	Peptide	TLTAEAESFLK	909.521	1817.03	1512.83	2.64	2	2.31	0	0.95	iTRAQ8plex[+304.20536] (N-term); iTRAQ8plex[+304.20536] (K11)	2	26	2.30926e+07	2.42571e+08	0.973244	0.0840632	0.677295	0.113791	rep2	Yes
15	Cluster20392	Peptide	TLTAEAESFLK	708.086	2121.24	2121.24	2.4	3	2.41	0	0.95	iTRAQ8plex[+304.20536] (N-term); iTRAQ8plex[+304.20536] (K11); iTRAQ8plex[+304.20536] (S8)	2	2	1.59561e+07	3.8221e+07	0.988673	0.0783184	44.087	0.107339	rep2	Yes
15	Cluster20392	Peptide	TLTAEAESFLK	920.516	1839.02	1839.02	2.18	2	2.31	0	0.95	iTRAQ8plex[+304.20536] (N-term); iTRAQ8plex[+304.20536] (K11); Cation:Na[+21.981943] (E7)	2	1	6.73706e+06	6.73706e+06	1.08152	0.117081	55.6694	0.0689226	rep2	Yes
15	Cluster20392	Peptide	TLTAEAESFLKEGIK	572.58	2286.3	1982.09	10	4	3.44	0.66	0.95	Acetyl[+42.010565] (K11); iTRAQ8plex[+304.20536] (K15)	2	1	1.75982e+07	1.75982e+07	0.822411	0.184432	0.649519	0.0220678	rep2	Yes
15	Cluster20392	Peptide	TNKPEFQEIIASTK	1107.63	2213.25	1909.05	10	2	5.24	3.21	0.95	iTRAQ8plex[+304.20536] (K14)	2	3	2.09341e+06	3.97274e+07	0.678118	0.190985	0.664529	0.0416906	rep2	Yes
15	Cluster20392	Peptide	TNKPEFQEIIASTK	1107.63	2213.25	2213.25	1.81	2	2.31	0	0.95	iTRAQ8plex[+304.20536] (N-term); iTRAQ8plex[+304.20536] (K3); iTRAQ8plex[+304.20536] (K14)	2	15	2.09341e+06	191516365	0.678118	0.190985	0.664528	0.0416905	rep2	Yes
15	Cluster20392	Peptide	VINALANPIDGR	778.956	1555.9	1251.69	10	2	4.52	5.78	1		2	19	3.62792e+07	1.49107e+09	0	0	0	0	rep2	No
16	Cluster6726	Peptide	AKFEELCSDLLDR	638.991	1913.95	1913.95	2.19	3	2.41	0	0.95	Delta:H(2)C(2)[+26.01565] (N-term); iTRAQ8plex[+304.20536] (K2); Methylthio (C7)	2	2	2.62358e+06	4.78542e+06	2.01909	3.77087	42.1247	52.8519	rep1	Yes
16	Cluster6726	Peptide	AVVTVPAYFNDSQR	936	1869.99	1565.78	10	2	4.69	4.15	0.95		2	5	1.15616e+08	4.53705e+08	0	0	0	0	rep1	No
16	Cluster6726	Peptide	AVVTVPAYFNDSQR	624.665	1870.97	1870.97	0.8	3	2.41	0	0.95	iTRAQ8plex[+304.20536] (N-term); Deamidated[+0.984016] (N10)	2	7	1.50865e+07	7.40889e+07	6.25629	5.19331	55.1572	55.0658	rep1	Yes
16	Cluster6726	Peptide	DDNGNVK	685.379	1368.74	1368.75	2.78	2	2.31	0	0.95	iTRAQ8plex[+304.20536] (N-term); iTRAQ8plex[+304.20536] (K7)	2	1	1.41181e+07	1.41181e+07	1.04566	5.184	32.0619	2.12545	rep2	Yes
16	Cluster6726	Peptide	DEVEQMVQEAER	883.93	1765.84	1461.64	10	2	5.33	6.09	1		2	3	3.44426e+07	6.32324e+07	0	0	0	0	rep1	No
16	Cluster6726	Peptide	DEVEQMVQEAER	891.928	1781.84	1477.64	10	2	3.4	2.8	0.95	Oxidation[+15.994915] (M6)	2	1	2.57932e+07	2.57932e+07	0	0	0	0	rep2	No
16	Cluster6726	Peptide	DIDEVILVGGSTR	839.469	1676.92	1372.72	10	2	4.57	4.12	0.95		2	6	3.18388e+07	4.04118e+08	0	0	0	0	rep1	No
16	Cluster6726	Peptide	GGDDVIDADFTDSK	1032.02	2062.03	1757.83	9.5	2	4.89	5.6	1	iTRAQ8plex[+304.20536] (K14)	2	1	2.51966e+07	2.51966e+07	1.29826	5.30711	0.72695	2.53679	rep1	Yes
16	Cluster6726	Peptide	GGDDVIDADFTDSK	892.927	1783.84	1783.84	1.35	2	2.31	0	0.95	Delta:H(2)C(2)[+26.01565] (N-term); iTRAQ8plex[+304.20536] (K14)	2	1	7.86328e+06	7.86328e+06	77.7503	0.090244	0.557497	7.98021	rep2	Yes
16	Cluster6726	Peptide	IAGLEVLR	448.782	895.549	895.551	2.46	2	2.31	0	0.95	Delta:H(2)C(2)[+26.01565] (N-term)	2	1	1.13201e+07	1.13201e+07	0	0	0	0	rep2	No
16	Cluster6726	Peptide	IAGLEVLR	587.876	1173.74	869.534	10	2	3.03	3.4	0.95		2	4	4.73138e+08	6.35272e+08	0	0	0	0	rep1	No
16	Cluster6726	Peptide	IINEPTAASLAYGFER	1028.55	2055.09	1750.89	10	2	5.53	5.46	1		2	7	4.68938e+07	6.55936e+08	0	0	0	0	rep2	No
16	Cluster6726	Peptide	IPAVQEVVR	438.938	1313.8	1009.59	10	3	2.67	3.85	0.98		2	1	1.90689e+07	1.90689e+07	0	0	0	0	rep2	No
16	Cluster6726	Peptide	LASGTTQEIK	828.49	1654.97	1350.77	9.5	2	4.49	3.16	0.95	iTRAQ8plex[+304.20536] (K10)	2	1	4.48832e+07	4.48832e+07	1.28809	4.33853	0.324638	2.31613	rep1	Yes
16	Cluster6726	Peptide	LDGIPPAPR	627.378	1252.74	948.539	10	2	2.8	2.61	0.95	Methyl[+14.01565] (R9)	2	6	6.1297e+07	2.96937e+08	0	0	0	0	rep1	No
16	Cluster6726	Peptide	LVDDASR	540.302	1078.59	774.387	10	2	2.82	3.16	0.95		2	2	4.24464e+08	1.18357e+09	0	0	0	0	rep2	No
16	Cluster6726	Peptide	QFAAEEISAQVLR	735.883	1469.75	1469.75	0.68	2	2.31	0	0.95	Gln->pyro-Glu[-17.026549] (N-term)	2	2	4.98378e+06	1.06169e+07	0	0	0	0	rep1	No
16	Cluster6726	Peptide	QFAAEEISAQVLR	883.49	1764.97	1460.76	10	2	5.01	5.04	0.99		2	10	1.13912e+08	5.58688e+08	0	0	0	0	rep1	No
16	Cluster6726	Peptide	SEVFSTAADGQTSVEINVLQGER	914.469	2740.38	2436.18	10	3	5.89	7.47	1		2	8	4.44984e+06	1.19172e+08	0	0	0	0	rep2	No
16	Cluster6726	Peptide	SLGSFR	485.783	969.552	665.35	10	2	2.31	2.44	0.95		2	1	2.13767e+08	2.13767e+08	0	0	0	0	rep1	No
16	Cluster6726	Peptide	VVKDDNGNVK	672.398	2014.17	2014.17	2.09	3	2.41	0	0.95	iTRAQ8plex[+304.20536] (N-term); iTRAQ8plex[+304.20536] (K3); iTRAQ8plex[+304.20536] (K10)	2	1	1.75908e+07	1.75908e+07	1.46804	3.62941	0.290938	8.65446	rep1	Yes
17	Cluster6699	Peptide	AVITVPAYFNDSQR	730.406	2188.2	2188.2	2.33	3	2.41	0	0.95	iTRAQ8plex[+304.20536] (N-term); iTRAQ8plex[+304.20536] (Y8)	2	2	1.85639e+07	3.7137e+07	0.00956053	0.25655	0.628284	11.0355	rep2	Yes
17	Cluster6699	Peptide	AVITVPAYFNDSQR	629.335	1884.98	1884.99	1.91	3	2.41	0	0.95	iTRAQ8plex[+304.20536] (N-term); Deamidated[+0.984016] (N10)	2	1	1.46723e+07	1.46723e+07	1.11769	3.25845	55.5456	0.845087	rep2	Yes
17	Cluster6699	Peptide	DAIDTK	635.874	1269.73	965.534	9.5	2	2.58	2.54	0.95	iTRAQ8plex[+304.20536] (K6)	2	1	2.14708e+08	2.14708e+08	0.0057483	0.0298539	0.135108	4.23	rep1	Yes
17	Cluster6699	Peptide	DEVDQMVQEAER	584.95	1751.82	1447.62	10	3	3.38	2.68	0.95		2	1	1.7457e+07	1.7457e+07	0	0	0	0	rep2	No
17	Cluster6699	Peptide	DEVDQMVQEAER	884.914	1767.81	1463.62	10	2	3.19	2.56	0.95	Oxidation[+15.994915] (M6)	2	2	1.26446e+07	3.40556e+07	0	0	0	0	rep2	No
17	Cluster6699	Peptide	DEVDQMVQEAER	584.95	1751.83	1751.83	2.05	3	2.41	0	0.95	iTRAQ8plex[+304.20536] (N-term)	2	1	1.7457e+07	1.7457e+07	1.16388	0.0927062	8.74259	40.6849	rep2	Yes
17	Cluster6699	Peptide	DGDDVIDADFTDSK	707.687	2120.03	1815.83	10	3	3.29	3.58	0.95	iTRAQ8plex[+304.20536] (K14)	2	3	4.0177e+06	2.15729e+08	0.994305	0.0893097	50.4949	20.7817	rep2	Yes
17	Cluster6699	Peptide	DGDDVIDADFTDSK	921.931	1841.85	1841.85	0.54	2	2.31	0	0.95	Delta:H(2)C(2)[+26.01565] (N-term); iTRAQ8plex[+304.20536] (K14)	2	3	5.4917e+06	1.3137e+07	1.39965	0.0772593	0.397203	59.0705	rep1	Yes
17	Cluster6699	Peptide	DGDDVIDADFTDSK	928.938	1855.86	2120.04	0.47	2	2.31	0	0.95	iTRAQ8plex[+304.20536] (N-term); iTRAQ8plex[+304.20536] (K14)	2	2	4.13939e+06	8.15709e+06	0.0222417	0.804231	0.201276	1.71076	rep1	Yes
17	Cluster6699	Peptide	HIETTLTR	425.583	1273.73	969.524	10	3	2.68	2.67	0.95		2	1	2.45013e+08	2.45013e+08	0	0	0	0	rep2	No
17	Cluster6699	Peptide	IAGLDVLR	441.774	881.532	881.534	2.5	2	2.31	0	0.95	Delta:H(2)C(2)[+26.01565] (N-term)	2	1	1.26803e+07	1.26803e+07	0	0	0	0	rep2	No
17	Cluster6699	Peptide	IAGLDVLR	580.868	1159.72	855.518	10	2	2.88	2.68	0.95		2	2	2.23141e+08	2.36657e+08	0	0	0	0	rep1	No
17	Cluster6699	Peptide	IAGLDVLR	387.579	1159.71	1159.72	4.14	3	2.41	0	0.95	iTRAQ8plex[+304.20536] (N-term)	2	1	1.35155e+07	1.35155e+07	0.0294717	0.104694	0.576251	0.0254909	rep2	Yes
17	Cluster6699	Peptide	IASGTTQEIK	828.488	1654.96	1350.77	10	2	4.49	3.16	0.95	iTRAQ8plex[+304.20536] (K10)	2	1	3.68368e+07	3.68368e+07	1.08431	0.0625711	0.59544	0.00708281	rep2	Yes
17	Cluster6699	Peptide	IINEPTAASLAYGFER	1028.55	2055.09	1750.89	10	2	5.53	5.46	1		2	7	4.68938e+07	6.55936e+08	0	0	0	0	rep2	No
17	Cluster6699	Peptide	IPAVQEVVR	438.938	1313.8	1009.59	10	3	2.67	3.85	0.98		2	1	1.90689e+07	1.90689e+07	0	0	0	0	rep2	No
17	Cluster6699	Peptide	KQDITITGASTLPKDEVDQMVQEAER	763.817	3814.04	3814.03	1.57	5	2.61	0	0.95	iTRAQ8plex[+304.20536] (N-term); iTRAQ8plex[+304.20536] (K1); iTRAQ8plex[+304.20536] (K14)	2	1	1.11668e+06	1.11668e+06	1.46171	6.18381	0.332176	0.0818255	rep1	Yes
17	Cluster6699	Peptide	LDGIPPAPR	627.378	1252.74	948.539	10	2	2.8	2.61	0.95	Methyl[+14.01565] (R9)	2	6	6.1297e+07	2.96937e+08	0	0	0	0	rep1	No
17	Cluster6699	Peptide	LECPAIGK	742.922	1483.83	1179.63	3.22	2	2.31	0	0.95	iTRAQ8plex[+304.20536] (N-term); iTRAQ8plex[+304.20536] (K8); Methylthio (C3)	2	3	2.39653e+07	5.27411e+07	1.01847	0.0672049	0.602602	0.0593816	rep2	Yes
17	Cluster6699	Peptide	LSFSDIDEVILVGGSTR	1056.58	2111.14	1806.94	10	2	5.83	5.69	1		2	3	4.32037e+06	5.45582e+07	0	0	0	0	rep2	No
17	Cluster6699	Peptide	LSFSDIDEVILVGGSTR	704.72	2111.14	2111.15	1.28	3	2.41	0	0.95	iTRAQ8plex[+304.20536] (N-term)	2	2	1.67307e+07	2.10511e+07	0.0167136	0.0467058	61.0204	57.3935	rep1	Yes
17	Cluster6699	Peptide	LVDDASR	540.302	1078.59	774.387	10	2	2.82	3.16	0.95		2	2	4.24464e+08	1.18357e+09	0	0	0	0	rep2	No
17	Cluster6699	Peptide	NTTLPTSK	735.44	1468.86	1164.67	9.5	2	3.17	3.55	0.95	iTRAQ8plex[+304.20536] (K8)	2	1	7.92048e+07	7.92048e+07	1.38708	5.08559	0.460751	2.68178	rep1	Yes
17	Cluster6699	Peptide	QFAAEEISAQVLR	735.883	1469.75	1469.75	0.68	2	2.31	0	0.95	Gln->pyro-Glu[-17.026549] (N-term)	2	2	4.98378e+06	1.06169e+07	0	0	0	0	rep1	No
17	Cluster6699	Peptide	QFAAEEISAQVLR	883.49	1764.97	1460.76	10	2	5.01	5.04	0.99		2	10	1.13912e+08	5.58688e+08	0	0	0	0	rep1	No
17	Cluster6699	Peptide	SEVFSTAADGQTSVEINVLQGER	914.469	2740.38	2436.18	10	3	5.89	7.47	1		2	8	4.44984e+06	1.19172e+08	0	0	0	0	rep2	No
17	Cluster6699	Peptide	SLGSFR	485.783	969.552	665.35	10	2	2.31	2.44	0.95		2	1	2.13767e+08	2.13767e+08	0	0	0	0	rep1	No
17	Cluster6699	Peptide	VVDWLASNFK	596.346	1786.02	1481.82	9.5	3	3.32	4.52	1	iTRAQ8plex[+304.20536] (K10)	2	5	1.35873e+07	1.98519e+08	0.00575322	5.25262	128.736	3.31159	rep1	Yes
17	Cluster6699	Peptide	VVDWLASNFK	844.498	1686.98	1686.98	2.37	2	2.31	0	0.95	iTRAQ8plex[+304.20536] (N-term); iTRAQ8plex[+304.20536] (K10)	2	5	7.86604e+06	4.56874e+07	1.06744	0.207182	0.647788	20.7821	rep2	Yes
17	Cluster6699	Peptide	VVDWLASNFK	596.674	1787	1787	1.85	3	2.41	0	0.95	iTRAQ8plex[+304.20536] (N-term); iTRAQ8plex[+304.20536] (K10); Deamidated[+0.984016] (N8)	2	1	1.52069e+07	1.52069e+07	0.0228142	0.0606743	0.64229	0.751683	rep2	Yes
17	Cluster6699	Peptide	VVEDENGNVK	856.467	1710.92	1710.92	1.75	2	2.31	0	0.95	iTRAQ8plex[+304.20536] (N-term); iTRAQ8plex[+304.20536] (K10); Deamidated[+0.984016] (N6)	2	1	7851512	7851512	0.0215277	0.23432	39.0042	837.016	rep2	Yes
18	Cluster38384	Peptide	AATSFSVA	529.293	1056.57	752.37	10	2	2.31	1.96	0.95		2	2	1.60796e+07	3.91997e+07	0	0	0	0	rep2	No
18	Cluster38384	Peptide	AQAGDK	399.905	1196.69	892.492	9.5	3	2.69	3.93	0.99	iTRAQ8plex[+304.20536] (K6)	2	2	2.26467e+07	7.79605e+07	0.0524542	9.48509	0.238261	1.01071	rep1	Yes
18	Cluster38384	Peptide	AQAGDKR	677.403	1352.79	1352.79	1.63	2	2.31	0	0.95	iTRAQ8plex[+304.20536] (N-term); iTRAQ8plex[+304.20536] (K6)	2	28	2.48038e+06	1.27665e+08	0.015586	0.0432074	65.8984	2.12201	rep1	Yes
18	Cluster38384	Peptide	EVEYPGQVLR	747.416	1492.82	1188.61	10	2	3.54	4.24	0.95		2	81	8.50111e+07	7.48691e+09	0	0	0	0	rep1	No
18	Cluster38384	Peptide	TNTDFTAYNGDGFQVQVPAK	927.815	2780.42	2476.22	9.5	3	4.5	5.94	1	iTRAQ8plex[+304.20536] (K20)	2	4	6.35655e+07	1.64809e+08	2.30863	6.23477	0.828476	0.388893	rep1	Yes
18	Cluster38384	Peptide	TNTDFTAYNGDGFQVQVPAK	772.407	3085.6	3085.6	2.98	4	2.61	0	0.95	iTRAQ8plex[+304.20536] (N-term); iTRAQ8plex[+304.20536] (K20); iTRAQ8plex[+304.20536] (Y8); Deamidated[+0.984016] (N9)	2	5	8.56131e+06	6.04332e+07	1.58419	10.4305	10.1559	0.274243	rep1	Yes
18	Cluster38384	Peptide	TNTDFTAYNGDGFQVQVPAK	772.157	3084.6	3084.61	2.85	4	2.61	0	0.95	iTRAQ8plex[+304.20536] (N-term); iTRAQ8plex[+304.20536] (K20); iTRAQ8plex[+304.20536] (Y8)	2	1	7.79233e+06	7.79233e+06	0.0143236	0.0687573	9.2325	26.2113	rep1	Yes
18	Cluster38384	Peptide	TNTDFTAYNGDGFQVQVPAK	772.658	3086.6	3086.61	2.59	4	2.61	0	0.95	iTRAQ8plex[+304.20536] (N-term); iTRAQ8plex[+304.20536] (K20); iTRAQ8plex[+304.20536] (Y8); Deamidated[+0.984016] (Q16); Deamidated[+0.984016] (N9)	2	1	6.86736e+06	6.86736e+06	1.28956	0.0802321	22.473	87.4669	rep2	Yes
18	Cluster38384	Peptide	TNTDFTAYNGDGFQVQVPAK	1382.7	2763.39	2763.39	1.45	2	2.31	0	0.95	iTRAQ8plex[+304.20536] (N-term); iTRAQ8plex[+304.20536] (K20); Deamidated[+0.984016] (N9); Glu->pyro-Glu[-18.010565] (D11)	2	1	5.38605e+06	5.38605e+06	1.69654	0.05769	0.306013	24.0883	rep1	Yes
18	Cluster38384	Peptide	TNTDFTAYNGDGFQVQVPAK	1377.71	2753.41	2753.41	0.73	2	2.31	0	0.95	iTRAQ8plex[+304.20536] (N-term); iTRAQ8plex[+304.20536] (K20)	2	8	2.15584e+06	8.32635e+07	0.0109648	107.075	0.224744	0.984438	rep2	Yes
18	Cluster38384	Peptide	TNTDFTAYNGDGFQVQVPAK	1391.71	2781.4	2781.4	0.72	2	2.31	0	0.95	iTRAQ8plex[+304.20536] (N-term); iTRAQ8plex[+304.20536] (K20); Deamidated[+0.984016] (N9)	2	56	7.16254e+06	3.61249e+08	3.63861	0.0285578	0.219762	2.29437	rep1	Yes
18	Cluster38384	Peptide	TNTDFTAYNGDGFQVQVPAK	835.413	2503.21	2503.21	0.6	3	2.41	0	0.95	Delta:H(2)C(2)[+26.01565] (N-term); Deamidated[+0.984016] (N9); iTRAQ8plex[+304.20536] (K20)	2	2	1.34542e+07	2.549e+07	1.29363	0.0527247	6.98268	38.7311	rep1	Yes
18	Cluster38384	Peptide	TNTDFTAYNGDGFQVQVPAK	928.468	2782.38	2782.38	0.54	3	2.41	0	0.95	iTRAQ8plex[+304.20536] (N-term); iTRAQ8plex[+304.20536] (K20); Deamidated[+0.984016] (N2); Deamidated[+0.984016] (N9)	2	1	3.76663e+06	3.76663e+06	5.40227	15.2672	33.9411	19.1523	rep1	Yes
19	Cluster17192	Peptide	EDQVDDAELLELVELEVR	1209.63	2417.24	2113.04	10	2	6.37	7.11	1		2	16	5.87501e+06	1.95415e+08	0	0	0	0	rep1	No
19	Cluster17192	Peptide	ELLSSYEFNGDDIPIISGSALLAVETLTANPNVK	840.653	4198.22	3894.05	10	5	4.02	1.78	0.99	iTRAQ8plex[+304.20536] (K34)	2	1	1.38365e+07	1.38365e+07	1.07056	7.13972	0.583971	0.0621749	rep2	Yes
19	Cluster17192	Peptide	ELLSSYEFNGDDIPIISGSALLAVETLTANPNVK	840.653	4198.22	4198.23	1.79	5	2.61	0	0.95	iTRAQ8plex[+304.20536] (N-term); iTRAQ8plex[+304.20536] (K34)	2	1	1.38365e+07	1.38365e+07	1.07056	7.13971	0.583971	0.0621751	rep2	Yes
19	Cluster17192	Peptide	GITINTATVEYETENR	1058.05	2114.08	1809.87	10	2	6.25	7.26	1		2	9	4.60185e+06	4.97119e+08	0	0	0	0	rep2	No
19	Cluster17192	Peptide	GTVATGR	483.286	964.557	660.356	10	2	2.32	2.04	0.95		2	1	1.19519e+06	1.19519e+06	0	0	0	0	rep2	No
19	Cluster17192	Peptide	ILDEAMAGDNVGLLLR	674.039	2019.09	1714.89	10	3	4.61	6.19	1	Oxidation[+15.994915] (M6)	2	5	3.41327e+07	1.3212e+08	0	0	0	0	rep2	No
19	Cluster17192	Peptide	ILDEAMAGDNVGLLLR	863.465	1724.91	1724.91	1.28	2	2.31	0	0.95	Delta:H(2)C(2)[+26.01565] (N-term)	2	4	1.02942e+07	1.93501e+07	0	0	0	0	rep2	No
19	Cluster17192	Peptide	ILDEAMAGDNVGLLLR	871.462	1740.91	1740.9	0.57	2	2.31	0	0.95	Delta:H(2)C(2)[+26.01565] (N-term); Oxidation[+15.994915] (M6)	2	3	5.69068e+06	3.2046e+07	0	0	0	0	rep1	No
19	Cluster17192	Peptide	ILDEAMAGDNVGLLLR	1002.56	2003.1	1698.9	10	2	5.08	5.34	0.99		2	4	1.69214e+07	8.20481e+07	0	0	0	0	rep1	No
19	Cluster17192	Peptide	ILDEAMAGDNVGLLLR	668.705	2003.09	2003.1	1.35	3	2.41	0	0.95	iTRAQ8plex[+304.20536] (N-term)	2	4	2.17172e+07	7.08425e+07	0.0275318	5.66384	69.6056	48.8831	rep1	Yes
19	Cluster17192	Peptide	IYELMDSVDSYIPIPTR	772.742	2315.2	2011	10	3	4.23	6.34	1		2	1	1.79571e+07	1.79571e+07	0	0	0	0	rep2	No
19	Cluster17192	Peptide	QTDLPFLLAVEDVFSITGR	809.112	2424.32	2120.12	10	3	6.38	7.49	1		2	3	3.15005e+06	1.1593e+07	0	0	0	0	rep2	No
19	Cluster17192	Peptide	QTDLPFLLAVEDVFSITGR	809.112	2424.31	2424.32	2.47	3	2.41	0	0.95	iTRAQ8plex[+304.20536] (N-term)	2	3	3.15005e+06	1.1593e+07	1.20801	0.268842	0.61434	0.622363	rep2	Yes
19	Cluster17192	Peptide	TVGAGVIQTILE	752.945	1503.88	1199.68	10	2	2.75	2.64	0.95		2	2	6.11301e+06	1.06029e+07	0	0	0	0	rep2	No
19	Cluster17192	Peptide	TVGAGVIQTILE	745.938	1489.86	1489.86	0.67	2	2.31	0	0.95	iTRAQ8plex[+304.20536] (N-term)	2	3	4.84612e+06	1.22811e+07	3.71893	1.37849	30.7257	15.3181	rep1	Yes
19	Cluster17192	Peptide	VGETVDLVGLR	487.956	1460.85	1156.65	10	3	4	5.99	1		2	7	5.48819e+07	9.76489e+08	0	0	0	0	rep1	No
19	Cluster17192	Peptide	VGETVDLVGLR	592.34	1182.66	1182.66	2.2	2	2.31	0	0.95	Delta:H(2)C(2)[+26.01565] (N-term)	2	2	3.44841e+06	9.78281e+06	0	0	0	0	rep2	No
19	Cluster17192	Peptide	YDEIDAAPEER	806.392	1610.77	1306.57	10	2	4.53	5.3	0.99		2	2	5.31945e+07	1.16556e+08	0	0	0	0	rep2	No
20	Cluster16362	Peptide	ADEISNIIR	515.78	1029.55	1029.55	0.09	2	3.36	4.48	0.97		2	5	1.52106e+08	3.59623e+08	0	0	0	0	rep1	No
20	Cluster16362	Peptide	ADEISNIIR	667.881	1333.75	1333.74	2.7	2	2.31	0	0.95	iTRAQ8plex[+304.20536] (N-term)	2	22	7850483	1.94475e+08	1.06044	0.169234	0.652793	0.20537	rep2	Yes
20	Cluster16362	Peptide	ADEISNIIR	819.981	1637.95	1637.95	2.56	2	2.31	0	0.95	iTRAQ8plex[+304.20536] (N-term); iTRAQ8plex[+304.20536] (S5)	2	2	3.40394e+06	1.9934e+07	1.10891	0.332334	0.637886	4.97837	rep2	Yes
20	Cluster16362	Peptide	ASSVAQVVTSLQER	889.998	1777.98	1473.78	10	2	6.01	6.24	1		2	24	2.73715e+07	1.20538e+09	0	0	0	0	rep2	No
20	Cluster16362	Peptide	ASSVAQVVTSLQER	594.001	1778.98	1778.94	3.04	3	2.41	0	0.95	iTRAQ8plex[+304.20536] (N-term); Deamidated[+0.984016] (Q6)	2	1	5.09933e+06	5.09933e+06	0.981355	0.108563	48.5431	26.0784	rep2	Yes
20	Cluster16362	Peptide	ASSVAQVVTSLQER	1042.1	2082.18	2082.19	2.88	2	2.31	0	0.95	iTRAQ8plex[+304.20536] (N-term); iTRAQ8plex[+304.20536] (S10)	2	3	391492	2.91606e+07	1.25769	6.48484	0.619305	3.67218	rep2	Yes
20	Cluster16362	Peptide	ASSVAQVVTSLQER	1042.1	2082.18	2082.19	2.88	2	2.31	0	0.95	iTRAQ8plex[+304.20536] (N-term); iTRAQ8plex[+304.20536] (S3)	2	7	1.34504e+06	1.2034e+08	1.41616	0.204465	0.637599	3.55346	rep2	Yes
20	Cluster16362	Peptide	ASSVAQVVTSLQER	695.069	2082.18	2082.19	2.45	3	2.41	0	0.95	iTRAQ8plex[+304.20536] (N-term); iTRAQ8plex[+304.20536] (T9)	2	2	1.2286e+07	2.27522e+07	1.18372	0.0889809	53.094	0.161606	rep2	Yes
20	Cluster16362	Peptide	ASSVAQVVTSLQER	889.995	1777.97	1473.78	2.17	2	2.31	0	0.95	iTRAQ8plex[+304.20536] (N-term)	2	23	9.15858e+06	3.69832e+08	1.31926	0.186889	0.608454	11.8063	rep2	Yes
20	Cluster16362	Peptide	ATGKIAQIPVSEAYLGR	693.399	2077.18	1772.98	10	3	3.76	3.02	0.95		2	1	9.81857e+06	9.81857e+06	0	0	0	0	rep2	No
20	Cluster16362	Peptide	ATGKIAQIPVSEAYLGR	693.399	2077.17	2077.18	2.31	3	2.41	0	0.95	iTRAQ8plex[+304.20536] (N-term); iTRAQ8plex[+304.20536] (K4)	2	1	9.81857e+06	9.81857e+06	1.17126	6.35614	29.2773	7.63148	rep2	Yes
20	Cluster16362	Peptide	ATQNQLAR	603.838	1205.66	1205.66	1.66	2	2.31	0	0.95	iTRAQ8plex[+304.20536] (N-term); Deamidated[+0.984016] (N4)	2	3	8.27485e+06	3.17364e+07	0.5075	6.88904	43.0177	148.871	rep2	Yes
20	Cluster16362	Peptide	EAYPGDVFYLHSR	619.984	1856.93	1552.73	10	3	4.64	5.83	1		2	25	3.16013e+07	7.58895e+08	0	0	0	0	rep1	No
20	Cluster16362	Peptide	EAYPGDVFYLHSR	790.381	1578.75	1578.75	2.66	2	2.31	0	0.95	Delta:H(2)C(2)[+26.01565] (N-term)	2	5	1.55388e+07	5.89524e+07	0	0	0	0	rep2	No
20	Cluster16362	Peptide	EQHTLIIYDDLSK	1092.11	2182.21	1878	9.5	2	6.6	7.2	1	iTRAQ8plex[+304.20536] (K13)	2	16	1.77981e+07	7.82146e+08	1.03024	35.7854	0.841907	1.59122	rep1	Yes
20	Cluster16362	Peptide	EQHTLIIYDDLSK	829.81	2486.41	2486.42	3.86	3	2.41	0	0.95	iTRAQ8plex[+304.20536] (N-term); iTRAQ8plex[+304.20536] (K13); iTRAQ8plex[+304.20536] (Y8)	2	1	3.81433e+06	3.81433e+06	0.01615	0.0769097	0.710953	4.54089	rep2	Yes
20	Cluster16362	Peptide	EQHTLIIYDDLSK	1092.11	2182.2	1878.01	1.06	2	2.31	0	0.95	iTRAQ8plex[+304.20536] (N-term); iTRAQ8plex[+304.20536] (K13)	2	14	1.02399e+07	1.78722e+08	1.07373	4.56218	0.362267	1.92922	rep1	Yes
20	Cluster16362	Peptide	EVTIVNTGTVLQVGDGIAR	1123.63	2245.26	1941.05	10	2	6.35	6.68	1		2	29	8.81387e+06	1.01921e+09	0	0	0	0	rep2	No
20	Cluster16362	Peptide	EVTIVNTGTVLQVGDGIAR	1123.63	2245.25	1941.05	2.06	2	2.31	0	0.95	iTRAQ8plex[+304.20536] (N-term)	2	25	1.35433e+07	300511170	1.06682	0.154454	0.722394	0.0190796	rep2	Yes
20	Cluster16362	Peptide	EVTIVNTGTVLQVGDGIAR	1114.63	2227.25	2227.25	0.9	2	2.31	0	0.95	iTRAQ8plex[+304.20536] (N-term); Glu->pyro-Glu[-18.010565] (T9)	2	2	5.04615e+06	3.55002e+07	1.02703	0.0768623	38.7256	0.04773	rep2	Yes
20	Cluster16362	Peptide	EVTIVNTGTVLQVGDGIAR	1136.64	2271.27	2271.27	0.88	2	2.31	0	0.95	Delta:H(2)C(2)[+26.01565] (N-term); iTRAQ8plex[+304.20536] (T3)	2	1	6.19753e+06	6.19753e+06	1.25068	0.0834408	0.694513	0.042321	rep2	Yes
20	Cluster16362	Peptide	GKISASESR	640.863	1279.71	975.499	10	2	2.85	2.18	0.95	Acetyl[+42.010565] (K2)	2	1	1.31182e+07	1.31182e+07	0	0	0	0	rep1	No
20	Cluster16362	Peptide	IAQIPVSEAYLGR	860.998	1719.98	1415.78	10	2	4.13	4.46	0.96		2	20	4.90665e+08	1.3049e+09	0	0	0	0	rep1	No
20	Cluster16362	Peptide	ISASESR	527.292	1052.57	1052.57	3.23	2	2.31	0	0.95	iTRAQ8plex[+304.20536] (N-term)	2	2	2.22118e+07	5.28008e+07	1.64279	6.08078	45.5405	0.662241	rep2	Yes
20	Cluster16362	Peptide	LIESPAPGIISR	519.648	1555.92	1251.72	10	3	3.72	6.16	1		2	10	4.66679e+08	1.76842e+09	0	0	0	0	rep1	No
20	Cluster16362	Peptide	LIESPAPGIISR	931.069	1860.12	1860.12	2.58	2	2.31	0	0.95	iTRAQ8plex[+304.20536] (N-term); iTRAQ8plex[+304.20536] (S11)	2	3	3.597e+06	2.54788e+07	1.05903	0.217559	0.668824	3.89482	rep2	Yes
20	Cluster16362	Peptide	LIESPAPGIISR	621.048	1860.12	1860.13	2.26	3	2.41	0	0.95	iTRAQ8plex[+304.20536] (N-term); iTRAQ8plex[+304.20536] (S4)	2	3	2.82213e+07	6.26868e+07	6.17661	1.70169	0.118965	0.699128	rep1	Yes
20	Cluster16362	Peptide	LIESPAPGIISR	792.965	1583.91	1583.92	1.77	2	2.31	0	0.95	iTRAQ8plex[+304.20536] (N-term)	2	4	2.32671e+07	3.78833e+07	1.1338	0.147925	0.627783	22.4508	rep2	Yes
20	Cluster16362	Peptide	LIESPAPGIISR	526.975	1577.9	1577.9	1.71	3	2.41	0	0.95	iTRAQ8plex[+304.20536] (N-term); Cation:Na[+21.981943] (E3)	2	1	2.02871e+07	2.02871e+07	0.0295707	0.199193	0.659921	0.273163	rep2	Yes
20	Cluster16362	Peptide	LIESPAPGIISRR	828.975	1655.93	1655.94	1.81	2	2.31	0	0.95	iTRAQ8plex[+304.20536] (N-term)	2	1	2.69705e+07	2.69705e+07	0.966951	0.152831	0.647791	0.0422973	rep2	Yes
20	Cluster16362	Peptide	QMSLLLR	582.855	1163.7	859.495	10	2	2.92	3.21	0.95		2	3	4.10488e+07	5.67429e+08	0	0	0	0	rep2	No
20	Cluster16362	Peptide	SVYEPLQTGLIAIDSMIPIGR	865.143	2592.41	2288.21	10	3	5.11	7	1	Oxidation[+15.994915] (M16)	2	27	1.41953e+07	6.96504e+08	0	0	0	0	rep2	No
20	Cluster16362	Peptide	SVYEPLQTGLIAIDSMIPIGR	1289.22	2576.42	2272.21	10	2	6.72	7.55	1		2	14	1.7589e+07	6.67413e+08	0	0	0	0	rep1	No
20	Cluster16362	Peptide	VINALANPIDGR	778.956	1555.9	1251.69	10	2	4.52	5.78	1		2	19	3.62792e+07	1.49107e+09	0	0	0	0	rep2	No
20	Cluster16362	Peptide	VINALANPIDGR	778.957	1555.9	1251.72	3.36	2	2.31	0	0.95	iTRAQ8plex[+304.20536] (N-term)	2	7	8.63246e+06	5.6922e+07	1.09019	0.11507	0.639333	0.156121	rep2	Yes
20	Cluster16362	Peptide	VINALANPIDGR	769.952	1537.89	1537.89	2.47	2	2.31	0	0.95	iTRAQ8plex[+304.20536] (N-term); Glu->pyro-Glu[-18.010565] (D10)	2	2	1.87223e+07	4.35878e+07	1.02128	0.118673	0.00642499	0.119527	rep2	Yes
20	Cluster16362	Peptide	VINALANPIDGR	779.449	1556.88	1252.68	1.92	2	2.31	0	0.95	iTRAQ8plex[+304.20536] (N-term); Deamidated[+0.984016] (N3)	2	4	2.30875e+07	4.95117e+07	2.82388	0.31843	0.708613	43.0216	rep2	Yes
20	Cluster16362	Peptide	VINALANPIDGR	513.963	1538.87	1538.87	1.75	3	2.41	0	0.95	iTRAQ8plex[+304.20536] (N-term); Deamidated[+0.984016] (N7); Glu->pyro-Glu[-18.010565] (D10)	2	1	1.13326e+07	1.13326e+07	0.917443	0.257673	0.701816	44.0367	rep2	Yes
20	Cluster16362	Peptide	VINALANPIDGR	770.441	1538.87	1538.87	1.43	2	2.31	0	0.95	iTRAQ8plex[+304.20536] (N-term); Deamidated[+0.984016] (N3); Glu->pyro-Glu[-18.010565] (D10)	2	1	2.88647e+07	2.88647e+07	1.31452	0.267336	0.703813	9.6983	rep2	Yes
21	Cluster6573	Peptide	AKFEELCSDLLDR	630.318	1887.93	1887.94	2.86	3	2.41	0	0.95	iTRAQ8plex[+304.20536] (N-term); iTRAQ8plex[+304.20536] (K2); Methylthio (C7)	2	18	8.4621e+06	4.87998e+07	1.37803	0.225226	0.571608	310.574	rep2	Yes
21	Cluster6573	Peptide	AVVTVPAYFNDSQR	936	1869.99	1565.78	10	2	4.69	4.15	0.95		2	5	1.15616e+08	4.53705e+08	0	0	0	0	rep1	No
21	Cluster6573	Peptide	AVVTVPAYFNDSQR	783.897	1565.78	1565.78	1.41	2	2.31	0	0.95	iTRAQ8plex[+304.20536] (N-term)	2	2	1.34003e+07	3.68543e+07	1.30356	4.94823	0.609428	7.34263	rep2	Yes
21	Cluster6573	Peptide	DAIDTK	483.772	965.529	965.531	2.28	2	2.31	0	0.95	iTRAQ8plex[+304.20536] (N-term); iTRAQ8plex[+304.20536] (K6)	2	1	3.06568e+07	3.06568e+07	1.20627	8.08915	0.392227	0.727355	rep2	Yes
21	Cluster6573	Peptide	DEGIDLLK	755.948	1509.88	1205.68	10	2	3.53	3.23	0.95	iTRAQ8plex[+304.20536] (K8)	2	3	4.26852e+07	1.77813e+08	0.983737	0.076335	0.591334	0.00743566	rep2	Yes
21	Cluster6573	Peptide	DEGIDLLK	504.3	1509.88	1509.88	3.18	3	2.41	0	0.95	iTRAQ8plex[+304.20536] (N-term); iTRAQ8plex[+304.20536] (K8)	2	1	7.28081e+06	7.28081e+06	0.00943693	6.91861	0.232649	1.39587	rep2	Yes
21	Cluster6573	Peptide	DEGIDLLKDK	515.308	2057.2	2057.21	2.72	4	2.61	0	0.95	iTRAQ8plex[+304.20536] (N-term); iTRAQ8plex[+304.20536] (K8); iTRAQ8plex[+304.20536] (K10)	2	1	2.73396e+07	2.73396e+07	0.00820489	0.0779657	157.385	10.1659	rep2	Yes
21	Cluster6573	Peptide	DEVEQMVQEAER	883.93	1765.84	1461.64	10	2	5.33	6.09	1		2	3	3.44426e+07	6.32324e+07	0	0	0	0	rep1	No
21	Cluster6573	Peptide	DEVEQMVQEAER	891.928	1781.84	1477.64	10	2	3.4	2.8	0.95	Oxidation[+15.994915] (M6)	2	1	2.57932e+07	2.57932e+07	0	0	0	0	rep2	No
21	Cluster6573	Peptide	DEVEQMVQEAER	883.929	1765.84	1765.85	1.81	2	2.31	0	0.95	iTRAQ8plex[+304.20536] (N-term)	2	2	1.71007e+07	2.87898e+07	1.10097	0.116877	0.578702	0.104385	rep2	Yes
21	Cluster6573	Peptide	DIDEVILVGGSTR	839.469	1676.92	1372.72	10	2	4.57	4.12	0.95		2	6	3.18388e+07	4.04118e+08	0	0	0	0	rep1	No
21	Cluster6573	Peptide	DIDEVILVGGSTR	661.381	1981.12	1981.12	2.42	3	2.41	0	0.95	iTRAQ8plex[+304.20536] (N-term); iTRAQ8plex[+304.20536] (S11)	2	1	1.29476e+07	1.29476e+07	1.20971	0.222904	0.632533	1.13614	rep2	Yes
21	Cluster6573	Peptide	DIDEVILVGGSTR	839.47	1676.92	1676.93	1.43	2	2.31	0	0.95	iTRAQ8plex[+304.20536] (N-term)	2	3	1.44475e+07	3.74422e+07	1.19126	0.294306	44.3401	34.0142	rep2	Yes
21	Cluster6573	Peptide	EKVEAK	808.505	1614.99	1615	2.97	2	2.31	0	0.95	iTRAQ8plex[+304.20536] (N-term); iTRAQ8plex[+304.20536] (K2); iTRAQ8plex[+304.20536] (K6)	2	1	2526624	2526624	1.16609	0.271464	0.603566	638.573	rep2	Yes
21	Cluster6573	Peptide	FDIDANGILSVSASDK	1131.11	2260.2	2260.2	0.88	2	2.31	0	0.95	iTRAQ8plex[+304.20536] (N-term); iTRAQ8plex[+304.20536] (K16); Deamidated[+0.984016] (N6)	2	1	1.42075e+07	1.42075e+07	4.47282	4.52479	0.133522	0.00595975	rep1	Yes
21	Cluster6573	Peptide	FEELCSDLLDR	571.268	1710.78	1710.78	1.75	3	2.41	0	0.95	iTRAQ8plex[+304.20536] (N-term); Cation:Na[+21.981943] (E3); Methylthio (C5)	2	1	6.28055e+06	6.28055e+06	1.79455	0.056634	78.5299	2.54321	rep1	Yes
21	Cluster6573	Peptide	FEELCSDLLDR	845.409	1688.8	1688.81	1.18	2	2.31	0	0.95	iTRAQ8plex[+304.20536] (N-term); Methylthio (C5)	2	11	2.41312e+07	107429593	1.3806	3.2244	0.161627	3.0478	rep1	Yes
21	Cluster6573	Peptide	GGDDVIDADFTDSN	872.892	1743.77	1743.77	0	2	3.12	4.08	0.95	iTRAQ8plex[+304.20536] (N-term)	2	1	4.46602e+06	4.46602e+06	1.4744	9.22221	0.0142423	0.35892	rep1	Yes
21	Cluster6573	Peptide	GVPQIEVK	739.461	1476.91	1172.71	9.5	2	3.14	4.5	0.97	iTRAQ8plex[+304.20536] (K8)	2	4	1.70282e+08	539085753	1.05427	5.04791	0.384795	0.0968425	rep1	Yes
21	Cluster6573	Peptide	GVPQIEVK	739.459	1476.9	1476.9	2.71	2	2.31	0	0.95	iTRAQ8plex[+304.20536] (N-term); iTRAQ8plex[+304.20536] (K8)	2	2	6.14488e+06	1.54371e+07	0.0237494	0.364807	0.00380224	0.819144	rep2	Yes
21	Cluster6573	Peptide	HIETTLTR	425.583	1273.73	969.524	10	3	2.68	2.67	0.95		2	1	2.45013e+08	2.45013e+08	0	0	0	0	rep2	No
21	Cluster6573	Peptide	HIETTLTR	425.583	1273.73	1273.72	1.65	3	2.41	0	0.95	iTRAQ8plex[+304.20536] (N-term)	2	11	3.06053e+07	6.88578e+07	0.332768	6.24449	0.0721178	8.45122	rep1	Yes
21	Cluster6573	Peptide	IAGLEVLR	448.782	895.549	895.551	2.46	2	2.31	0	0.95	Delta:H(2)C(2)[+26.01565] (N-term)	2	1	1.13201e+07	1.13201e+07	0	0	0	0	rep2	No
21	Cluster6573	Peptide	IAGLEVLR	587.876	1173.74	869.534	10	2	3.03	3.4	0.95		2	4	4.73138e+08	6.35272e+08	0	0	0	0	rep1	No
21	Cluster6573	Peptide	IAGLEVLR	587.878	1173.74	1173.74	3.07	2	2.31	0	0.95	iTRAQ8plex[+304.20536] (N-term)	2	1	4.18875e+06	4.18875e+06	1.11214	8.42211	23.253	8.65028	rep2	Yes
21	Cluster6573	Peptide	IELSSLTQTNMSLPFITATADGPK	1048.57	3142.7	2838.5	9.5	3	5.69	6.22	1	iTRAQ8plex[+304.20536] (K24)	2	4	2.134e+07	1.33521e+08	1.57873	5.80213	63.6878	0.0135835	rep1	Yes
21	Cluster6573	Peptide	IELSSLTQTNMSLPFITATADGPK	786.682	3142.69	3142.7	1.53	4	2.61	0	0.95	iTRAQ8plex[+304.20536] (N-term); iTRAQ8plex[+304.20536] (K24)	2	3	3.36375e+07	6.78072e+07	0.0316859	0.1592	0.616731	0.0398019	rep2	Yes
21	Cluster6573	Peptide	IGNGSTQEIK	828.475	1654.93	1654.94	1.81	2	2.31	0	0.95	iTRAQ8plex[+304.20536] (N-term); iTRAQ8plex[+304.20536] (K10); Deamidated[+0.984016] (N3)	2	1	9.42008e+06	9.42008e+06	0.0119013	0.0902318	0.571277	2.12101	rep2	Yes
21	Cluster6573	Peptide	IGNGSTQEIK	689.378	1376.74	1376.74	1.74	2	2.31	0	0.95	Delta:H(2)C(2)[+26.01565] (N-term); Deamidated[+0.984016] (N3); iTRAQ8plex[+304.20536] (K10)	2	1	1.48526e+07	1.48526e+07	21.9482	8.1445	33.9169	144.009	rep2	Yes
21	Cluster6573	Peptide	IINEPTAASLAYGFER	1028.55	2055.09	1750.89	10	2	5.53	5.46	1		2	7	4.68938e+07	6.55936e+08	0	0	0	0	rep2	No
21	Cluster6573	Peptide	IINEPTAASLAYGFER	787.44	2359.3	2359.3	1.65	3	2.41	0	0.95	iTRAQ8plex[+304.20536] (N-term); iTRAQ8plex[+304.20536] (Y12)	2	6	1.74258e+07	6.0724e+07	2.0145	1.61842	0.505141	2.7223	rep1	Yes
21	Cluster6573	Peptide	IINEPTAASLAYGFER	876.454	1750.89	1750.9	1.37	2	2.31	0	0.95	iTRAQ8plex[+304.20536] (N-term)	2	3	1.96196e+07	3.7913e+07	0.0153444	0.446371	0.617984	0.218379	rep2	Yes
21	Cluster6573	Peptide	IPAVQEVVR	438.938	1313.8	1009.59	10	3	2.67	3.85	0.98		2	1	1.90689e+07	1.90689e+07	0	0	0	0	rep2	No
21	Cluster6573	Peptide	KDEGIDLLK	972.096	1942.18	1942.17	1.96	2	2.31	0	0.95	iTRAQ8plex[+304.20536] (N-term); iTRAQ8plex[+304.20536] (K1); iTRAQ8plex[+304.20536] (K9)	2	2	2.6675e+06	2.08063e+07	257.047	18.4154	88.4521	2.54471	rep1	Yes
21	Cluster6573	Peptide	KLVDDASR	756.451	1510.89	1510.89	2.52	2	2.31	0	0.95	iTRAQ8plex[+304.20536] (N-term); iTRAQ8plex[+304.20536] (K1)	2	2	9.29967e+06	1.24901e+07	2.02171	7.67541	0.178717	174.411	rep2	Yes
21	Cluster6573	Peptide	KQDITITGASTLPKDEVEQMVQEAER	958.022	3828.06	3828.06	2.61	4	2.61	0	0.95	iTRAQ8plex[+304.20536] (N-term); iTRAQ8plex[+304.20536] (K1); iTRAQ8plex[+304.20536] (K14)	2	5	3.25113e+06	2.56561e+07	1.06624	6.83241	0.573362	3.81131	rep2	Yes
21	Cluster6573	Peptide	LDGIPPAPR	627.378	1252.74	948.539	10	2	2.8	2.61	0.95	Methyl[+14.01565] (R9)	2	6	6.1297e+07	2.96937e+08	0	0	0	0	rep1	No
21	Cluster6573	Peptide	LDGIPPAPR	627.378	1252.74	1252.74	1.76	2	2.31	0	0.95	iTRAQ8plex[+304.20536] (N-term); Pro->pyro-Glu[+13.979265] (R9)	2	3	3.86089e+07	9.21834e+07	0.0147514	0.149651	40.3314	6.96558	rep2	Yes
21	Cluster6573	Peptide	LQELKDK	893.561	1785.11	1480.91	9.5	2	3.03	2.79	0.95	iTRAQ8plex[+304.20536] (K5); iTRAQ8plex[+304.20536] (K7)	2	1	2.77372e+06	2.77372e+06	5.56034	16.7395	20.3264	576.762	rep1	Yes
21	Cluster6573	Peptide	LQELKDK	893.561	1785.11	1785.11	2.35	2	2.31	0	0.95	iTRAQ8plex[+304.20536] (N-term); iTRAQ8plex[+304.20536] (K5); iTRAQ8plex[+304.20536] (K7)	2	1	2.77372e+06	2.77372e+06	5.56036	16.7395	20.3264	576.767	rep1	Yes
21	Cluster6573	Peptide	LTEAAEK	685.409	1368.8	1368.81	2.92	2	2.31	0	0.95	iTRAQ8plex[+304.20536] (N-term); iTRAQ8plex[+304.20536] (K7)	2	1	1.03777e+07	1.03777e+07	105.378	0.0896312	52.59	0.99957	rep2	Yes
21	Cluster6573	Peptide	LVDDASR	540.302	1078.59	774.387	10	2	2.82	3.16	0.95		2	2	4.24464e+08	1.18357e+09	0	0	0	0	rep2	No
21	Cluster6573	Peptide	LVGQIAK	668.94	1335.87	1031.66	10	2	3.15	3.67	0.95	iTRAQ8plex[+304.20536] (K7)	2	5	1.69175e+07	4.97373e+08	74.5056	5.6458	42.39	3.33369	rep2	Yes
21	Cluster6573	Peptide	LVGQIAK	668.941	1335.87	1335.87	2.69	2	2.31	0	0.95	iTRAQ8plex[+304.20536] (N-term); iTRAQ8plex[+304.20536] (K7)	2	2	2.33349e+07	4.02524e+07	1.13233	0.202571	0.709183	2.79913	rep2	Yes
21	Cluster6573	Peptide	MNEVDEEAK	836.933	1671.85	1367.65	10	2	4.13	4.4	0.96	iTRAQ8plex[+304.20536] (K9)	2	2	1.60367e+07	5.50697e+07	0.980173	0.0757441	46.1778	0.00999832	rep2	Yes
21	Cluster6573	Peptide	MNEVDEEAK	836.933	1671.85	1671.85	2.27	2	2.31	0	0.95	iTRAQ8plex[+304.20536] (N-term); iTRAQ8plex[+304.20536] (K9)	2	1	1.60367e+07	1.60367e+07	0.980173	0.0757442	46.1778	0.00999828	rep2	Yes
21	Cluster6573	Peptide	NQADSVVYQTEK	995.538	1989.06	1684.86	10	2	5.68	6.86	1	iTRAQ8plex[+304.20536] (K12)	2	3	1.28725e+07	1.11751e+08	1.12059	0.106596	0.548766	0.0160888	rep2	Yes
21	Cluster6573	Peptide	NQADSVVYQTEK	765.427	2293.26	2293.26	2.49	3	2.41	0	0.95	iTRAQ8plex[+304.20536] (N-term); iTRAQ8plex[+304.20536] (K12); iTRAQ8plex[+304.20536] (Y8)	2	1	2.92987e+07	2.92987e+07	0.0111565	0.134557	0.540798	0.00723853	rep2	Yes
21	Cluster6573	Peptide	NQADSVVYQTEK	995.538	1989.06	1989.06	2.21	2	2.31	0	0.95	iTRAQ8plex[+304.20536] (N-term); iTRAQ8plex[+304.20536] (K12)	2	1	1.28725e+07	1.28725e+07	1.12059	0.106596	0.548766	0.0160888	rep2	Yes
21	Cluster6573	Peptide	NQADSVVYQTEK	856.443	1710.87	1710.87	1.4	2	2.31	0	0.95	Delta:H(2)C(2)[+26.01565] (N-term); iTRAQ8plex[+304.20536] (K12)	2	1	4.83913e+06	4.83913e+06	1.09017	1.59362	0.528343	403.011	rep2	Yes
21	Cluster6573	Peptide	NQADSVVYQTEK	996.031	1990.05	1990.05	1.21	2	2.31	0	0.95	iTRAQ8plex[+304.20536] (N-term); iTRAQ8plex[+304.20536] (K12); Deamidated[+0.984016] (N1)	2	1	2.1381e+06	2.1381e+06	1.14227	0.596348	0.682523	5.28976	rep2	Yes
21	Cluster6573	Peptide	NSTLPTSK	728.432	1454.85	1150.65	10	2	3.48	3.4	0.95	iTRAQ8plex[+304.20536] (K8)	2	2	6.81331e+07	2.19774e+08	1.03162	0.102789	0.576857	0.014616	rep2	Yes
21	Cluster6573	Peptide	QAVVNPENTFFSVK	1094.61	2187.21	1883.01	10	2	5.06	5.04	0.99	iTRAQ8plex[+304.20536] (K14)	2	5	6.31852e+06	4.77443e+08	0.0100872	8.54331	35.3361	4.85618	rep2	Yes
21	Cluster6573	Peptide	QAVVNPENTFFSVK	1094.61	2187.21	2187.21	1.83	2	2.31	0	0.95	iTRAQ8plex[+304.20536] (N-term); iTRAQ8plex[+304.20536] (K14)	2	1	6.31852e+06	6.31852e+06	0.0100872	8.54333	35.3361	4.85619	rep2	Yes
21	Cluster6573	Peptide	QAVVNPENTFFSVK	933.998	1865.98	1865.98	0	2	2.31	0	0.95	Gln->pyro-Glu[-17.026549] (N-term); iTRAQ8plex[+304.20536] (K14)	2	2	6.44903e+06	8.27469e+06	0.0349815	2.14296	23.0701	2.47458	rep1	Yes
21	Cluster6573	Peptide	QFAAEEISAQVLR	735.883	1469.75	1469.75	0.68	2	2.31	0	0.95	Gln->pyro-Glu[-17.026549] (N-term)	2	2	4.98378e+06	1.06169e+07	0	0	0	0	rep1	No
21	Cluster6573	Peptide	QFAAEEISAQVLR	883.49	1764.97	1460.76	10	2	5.01	5.04	0.99		2	10	1.13912e+08	5.58688e+08	0	0	0	0	rep1	No
21	Cluster6573	Peptide	QFAAEEISAQVLR	883.493	1764.97	1460.76	2.19	2	2.31	0	0.95	iTRAQ8plex[+304.20536] (N-term)	2	4	1.70292e+07	7.93968e+07	1.25937	0.0794828	52.4539	0.0757948	rep2	Yes
21	Cluster6573	Peptide	SEVFSTAADGQTSVEINVLQGER	914.469	2740.38	2436.18	10	3	5.89	7.47	1		2	8	4.44984e+06	1.19172e+08	0	0	0	0	rep2	No
21	Cluster6573	Peptide	SEVFSTAADGQTSVEINVLQGER	914.467	2740.38	2739.25	1.1	3	2.41	0	0.95	iTRAQ8plex[+304.20536] (N-term)	2	13	6.71134e+06	1.6024e+08	0.0363032	6.95235	0.370109	0.531229	rep1	Yes
21	Cluster6573	Peptide	SGDRLVGQIAKR	794.974	1587.93	1587.94	3.02	2	2.31	0	0.95	iTRAQ8plex[+304.20536] (N-term); iTRAQ8plex[+304.20536] (K11)	2	1	3.39256e+06	3.39256e+06	1.06603	0.14283	0.581291	460.677	rep2	Yes
21	Cluster6573	Peptide	SLGSFR	485.783	969.552	665.35	10	2	2.31	2.44	0.95		2	1	2.13767e+08	2.13767e+08	0	0	0	0	rep1	No
21	Cluster6573	Peptide	VVDWLALNFK	907.04	1812.07	1507.87	10	2	3.45	3.56	0.95	iTRAQ8plex[+304.20536] (K10)	2	3	1.2368e+07	5.51816e+07	1.09272	0.112305	0.611408	0.165168	rep2	Yes
21	Cluster6573	Peptide	VVDWLALNFK	907.04	1812.06	1812.07	2.21	2	2.31	0	0.95	iTRAQ8plex[+304.20536] (N-term); iTRAQ8plex[+304.20536] (K10)	2	2	1.2368e+07	2.26098e+07	1.09273	0.112305	0.611407	0.165168	rep2	Yes
21	Cluster6573	Peptide	VVKDENGNVK	672.397	2014.17	2014.17	2.38	3	2.41	0	0.95	iTRAQ8plex[+304.20536] (N-term); iTRAQ8plex[+304.20536] (K3); iTRAQ8plex[+304.20536] (K10); Deamidated[+0.984016] (N6)	2	1	2.0474e+07	2.0474e+07	1.06733	0.329917	0.635198	0.918911	rep2	Yes
22	Cluster27630	Peptide	AATSFSVA	529.293	1056.57	752.37	10	2	2.31	1.96	0.95		2	2	1.60796e+07	3.91997e+07	0	0	0	0	rep2	No
22	Cluster27630	Peptide	AATSFSVA	529.293	1056.57	1056.57	2.46	2	2.31	1.19	0.95	iTRAQ8plex[+304.20536] (N-term)	2	2	1.60796e+07	4.55275e+07	0.465918	3.83782	0.12513	12.3192	rep2	Yes
22	Cluster27630	Peptide	AQAGDK	599.352	1196.69	1196.69	3.18	2	2.31	0	0.95	iTRAQ8plex[+304.20536] (N-term); iTRAQ8plex[+304.20536] (K6)	2	8	1.29576e+06	4.15423e+07	0.0306042	0.129304	0.63238	5.54479	rep2	Yes
22	Cluster27630	Peptide	EVEYPGQVLR	747.416	1492.82	1188.61	10	2	3.54	4.24	0.95		2	81	8.50111e+07	7.48691e+09	0	0	0	0	rep1	No
22	Cluster27630	Peptide	EVEYPGQVLR	899.518	1797.02	1797.02	2.89	2	2.31	0	0.95	iTRAQ8plex[+304.20536] (N-term); iTRAQ8plex[+304.20536] (Y4)	2	125	3.40556e+06	1123127146	0.835177	0.059963	0.652343	804.212	rep2	Yes
22	Cluster27630	Peptide	EVEYPGQVLR	760.422	1518.83	1518.83	2.63	2	2.31	0	0.95	Delta:H(2)C(2)[+26.01565] (N-term); iTRAQ8plex[+304.20536] (Y4)	2	2	8.72843e+06	2.90876e+07	0.796723	2.88752	15.887	0.434033	rep2	Yes
22	Cluster27630	Peptide	EVEYPGQVLR	738.411	1474.81	1474.81	2.58	2	2.31	0	0.95	iTRAQ8plex[+304.20536] (N-term); Glu->pyro-Glu[-18.010565] (E1)	2	1	2.86133e+07	2.86133e+07	0.0114826	0.110667	0.713491	3.57388	rep2	Yes
22	Cluster27630	Peptide	EVEYPGQVLR	505.94	1514.8	1514.8	1.78	3	2.41	0	0.95	iTRAQ8plex[+304.20536] (N-term); Cation:Na[+21.981943] (E3)	2	2	2.41377e+07	3.63742e+07	3.06699	0.389858	251.02	16.8142	rep2	Yes
22	Cluster27630	Peptide	EVEYPGQVLR	747.415	1492.81	1550.82	1.68	2	2.31	0	0.95	iTRAQ8plex[+304.20536] (N-term)	2	112	2.96537e+07	6.8184e+08	1.18234	0.155857	0.639871	28.8614	rep2	Yes
22	Cluster27630	Peptide	GANKFVEK	500.97	1499.89	1195.69	9.5	3	3.06	3	0.95	iTRAQ8plex[+304.20536] (K8)	2	1	7.5222e+07	7.5222e+07	2.14767	0.0699504	23.5161	22.2972	rep1	Yes
22	Cluster27630	Peptide	GANKFVEK	771.961	1541.91	1237.7	9.5	2	2.89	3.07	0.95	Acetyl[+42.010565] (K4); iTRAQ8plex[+304.20536] (K8)	2	2	1.96052e+07	2.48418e+07	135.544	0.141398	0.390823	0.00857544	rep1	Yes
22	Cluster27630	Peptide	HQLITATVNGGK	616.368	1846.08	1541.88	10	3	4.93	6.48	1	iTRAQ8plex[+304.20536] (K12)	2	6	2.67654e+07	165544891	0.916851	0.245486	0.513584	5.16253	rep2	Yes
22	Cluster27630	Peptide	HQLITATVNGGK	924.052	1846.09	1846.06	4.01	2	2.31	0	0.95	iTRAQ8plex[+304.20536] (N-term); iTRAQ8plex[+304.20536] (K12)	2	12	1.34719e+06	1.07768e+08	0.761918	0.271173	0.488485	3.84215	rep2	Yes
22	Cluster27630	Peptide	HQLITATVNGGK	924.542	1847.07	1542.87	3.5	2	2.31	0	0.95	iTRAQ8plex[+304.20536] (N-term); iTRAQ8plex[+304.20536] (K12); Deamidated[+0.984016] (N9)	2	231	2.17156e+06	1485591377	1.07005	0.176291	0.632799	6.03178	rep2	Yes
22	Cluster27630	Peptide	HQLITATVNGGK	931.55	1861.08	1861.09	2.69	2	2.31	0	0.95	iTRAQ8plex[+304.20536] (N-term); iTRAQ8plex[+304.20536] (K12); Pro->pyro-Glu[+13.979265] (I4); Deamidated[+0.984016] (N9)	2	1	3.67709e+06	3.67709e+06	35.4481	0.088257	36.5014	205.609	rep2	Yes
22	Cluster27630	Peptide	HQLITATVNGGK	915.538	1829.06	1829.06	2.51	2	2.31	0	0.95	iTRAQ8plex[+304.20536] (N-term); iTRAQ8plex[+304.20536] (K12); Gln->pyro-Glu[-17.026549] (N9)	2	2	5.92486e+06	1.86733e+07	1.0544	0.270354	0.682163	1147.93	rep2	Yes
22	Cluster27630	Peptide	HQLITATVNGGK	718.098	2151.27	2151.27	2.51	3	2.41	0	0.95	iTRAQ8plex[+304.20536] (N-term); iTRAQ8plex[+304.20536] (K12); iTRAQ8plex[+304.20536] (T5); Deamidated[+0.984016] (N9)	2	1	1.04011e+07	1.04011e+07	1.35544	14.7163	151.827	0.780378	rep1	Yes
22	Cluster27630	Peptide	HQLITATVNGGK	785.445	1568.87	1568.88	2.04	2	2.31	0	0.95	Delta:H(2)C(2)[+26.01565] (N-term); Deamidated[+0.984016] (N9); iTRAQ8plex[+304.20536] (K12)	2	4	7.02148e+06	3.58591e+07	1.07505	7.5889	23.2553	152.906	rep2	Yes
22	Cluster27630	Peptide	HQLITATVNGGK	625.368	1873.08	1873.08	1.6	3	2.41	0	0.95	iTRAQ8plex[+304.20536] (N-term); iTRAQ8plex[+304.20536] (K12); Delta:H(2)C(2)[+26.01565] (H1); Deamidated[+0.984016] (N9)	2	2	1.69914e+07	3.63147e+07	4.72532	0.765498	0.415843	1.24627	rep1	Yes
22	Cluster27630	Peptide	KNTDFTAYSGDGFIVQVPAK	844.478	3373.88	3373.89	2.85	4	2.61	0	0.95	iTRAQ8plex[+304.20536] (N-term); iTRAQ8plex[+304.20536] (K1); iTRAQ8plex[+304.20536] (K20); iTRAQ8plex[+304.20536] (Y8)	2	1	1.5992e+07	1.5992e+07	142.492	0.111853	10.5273	0.0197461	rep1	Yes
22	Cluster27630	Peptide	KNTDFTAYSGDGFIVQVPAK	1023.91	3068.69	3069.68	0.98	3	2.41	0	0.95	iTRAQ8plex[+304.20536] (N-term); iTRAQ8plex[+304.20536] (K1); iTRAQ8plex[+304.20536] (K20)	2	10	644905	3.803e+07	1.68858	7.1019	14.6169	2.34253	rep1	Yes
22	Cluster27630	Peptide	NTDFTAYSGDGFIVQVPAK	1319.7	2637.39	2333.18	10	2	5.5	6.91	1	iTRAQ8plex[+304.20536] (K19)	2	13	5.77301e+06	3.47598e+08	0.93817	8.09664	0.649037	0.276757	rep2	Yes
22	Cluster27630	Peptide	NTDFTAYSGDGFIVQVPAK	981.202	2940.58	2940.59	2.14	3	2.41	0	0.95	iTRAQ8plex[+304.20536] (N-term); iTRAQ8plex[+304.20536] (K19); iTRAQ8plex[+304.20536] (S8)	2	1	7.77292e+06	7.77292e+06	0.978187	0.0895683	0.644896	0.157762	rep2	Yes
22	Cluster27630	Peptide	NTDFTAYSGDGFIVQVPAK	1319.7	2637.38	2637.38	1.52	2	2.31	0	0.95	iTRAQ8plex[+304.20536] (N-term); iTRAQ8plex[+304.20536] (K19)	2	8	1.58946e+07	8.32279e+07	1.65225	2.60692	0.50605	2.12107	rep1	Yes
22	Cluster27630	Peptide	SITDYGSPEEFLSQVNYLLGK	1484.79	2967.56	2663.36	10	2	5.57	6.96	1	iTRAQ8plex[+304.20536] (K21)	2	21	1.80851e+07	5.28528e+08	0.00605625	0.0636215	64.9596	0.174405	rep2	Yes
22	Cluster27630	Peptide	SITDYGSPEEFLSQVNYLLGK	1091.92	3272.74	3272.75	2.75	3	2.41	0	0.95	iTRAQ8plex[+304.20536] (N-term); iTRAQ8plex[+304.20536] (K21); iTRAQ8plex[+304.20536] (S13); Deamidated[+0.984016] (N16)	2	2	1.8534e+06	1.61053e+07	0.973353	7.68908	0.691561	0.108366	rep2	Yes
22	Cluster27630	Peptide	SITDYGSPEEFLSQVNYLLGK	818.946	3271.75	3271.76	2.69	4	2.61	0	0.95	iTRAQ8plex[+304.20536] (N-term); iTRAQ8plex[+304.20536] (K21); iTRAQ8plex[+304.20536] (Y17)	2	5	1.64885e+06	2.55795e+07	28.1904	6.76891	0.609228	0.445392	rep2	Yes
22	Cluster27630	Peptide	SITDYGSPEEFLSQVNYLLGK	818.948	3271.76	3271.75	2.57	4	2.61	0	0.95	iTRAQ8plex[+304.20536] (N-term); iTRAQ8plex[+304.20536] (K21); iTRAQ8plex[+304.20536] (S13)	2	21	9.71234e+06	1.54154e+08	0.936446	6.90757	0.64942	0.467325	rep2	Yes
22	Cluster27630	Peptide	SITDYGSPEEFLSQVNYLLGK	1091.6	3271.77	3271.77	1.83	3	2.41	0	0.95	iTRAQ8plex[+304.20536] (N-term); iTRAQ8plex[+304.20536] (K21); iTRAQ8plex[+304.20536] (Y5)	2	1	524174	524174	1.12054	6.91912	0.675995	0.270857	rep2	Yes
22	Cluster27630	Peptide	SITDYGSPEEFLSQVNYLLGK	743.176	2968.67	2968.68	1.62	4	2.61	0	0.95	iTRAQ8plex[+304.20536] (N-term); iTRAQ8plex[+304.20536] (K21); Deamidated[+0.984016] (Q14)	2	2	9.87864e+06	2.06398e+07	0.964639	7.41355	0.660503	0.513841	rep2	Yes
22	Cluster27630	Peptide	SITDYGSPEEFLSQVNYLLGK	752.383	3005.5	3005.51	1.46	4	2.61	0	0.95	iTRAQ8plex[+304.20536] (N-term); iTRAQ8plex[+304.20536] (K21); Cation:K[+37.955882] (E10)	2	1	3.38174e+07	3.38174e+07	1.17339	0.0416325	0.714812	0.0190602	rep2	Yes
22	Cluster27630	Peptide	SITDYGSPEEFLSQVNYLLGK	990.526	2968.55	2968.55	1.31	3	2.41	0	0.95	iTRAQ8plex[+304.20536] (N-term); iTRAQ8plex[+304.20536] (K21); Deamidated[+0.984016] (N16)	2	26	1.42891e+07	3.86072e+08	0.00794752	0.0470408	115.45	74.2783	rep1	Yes
22	Cluster27630	Peptide	SITDYGSPEEFLSQVNYLLGK	997.519	2989.53	2989.54	1.2	3	2.41	0	0.95	iTRAQ8plex[+304.20536] (N-term); iTRAQ8plex[+304.20536] (K21); Cation:Na[+21.981943] (E10)	2	1	3.4139e+07	3.4139e+07	0.98844	0.076946	51.9244	0.258377	rep2	Yes
22	Cluster27630	Peptide	SITDYGSPEEFLSQVNYLLGK	990.195	2967.56	2663.36	1.13	3	2.41	0	0.95	iTRAQ8plex[+304.20536] (N-term); iTRAQ8plex[+304.20536] (K21)	2	53	5.2004e+06	6.22722e+08	1.43581	6.5309	0.39885	0.290743	rep1	Yes
22	Cluster27630	Peptide	SITDYGSPEEFLSQVNYLLGK	1345.7	2689.38	2689.38	0.74	2	2.31	0	0.95	Delta:H(2)C(2)[+26.01565] (N-term); iTRAQ8plex[+304.20536] (K21)	2	2	3.1768e+06	5.98272e+06	0.989607	0.219313	0.656195	0.409478	rep2	Yes
22	Cluster27630	Peptide	TADGDEGGK	729.384	1456.76	1152.56	10	2	4.14	5.25	0.99	iTRAQ8plex[+304.20536] (K9)	2	30	4.93776e+06	1391114840	0.0126944	6.39195	63.4056	349.683	rep2	Yes
22	Cluster27630	Peptide	TADGDEGGK	757.894	1513.77	1152.55	3.3	2	2.31	0	0.95	iTRAQ8plex[+304.20536] (N-term); iTRAQ8plex[+304.20536] (K9)	2	66	5.09166e+06	4.76885e+08	1.07291	0.108421	34.7078	131.107	rep2	Yes
22	Cluster27630	Peptide	TADGDEGGK	740.373	1478.73	1478.73	2.57	2	2.31	0	0.95	iTRAQ8plex[+304.20536] (N-term); iTRAQ8plex[+304.20536] (K9); Cation:Na[+21.981943] (E6)	2	2	2.40754e+07	3.86768e+07	1.01129	7.98562	0.678711	0.0145498	rep2	Yes
22	Cluster27630	Peptide	TADGDEGGK	590.292	1178.57	1178.57	1.7	2	2.31	0	0.95	Delta:H(2)C(2)[+26.01565] (N-term); iTRAQ8plex[+304.20536] (K9)	2	27	1.01684e+07	2.01882e+08	1.51488	4.41206	74.0811	2.08785	rep1	Yes
22	Cluster27630	Peptide	TADGDEGGKHQLITATVNGGK	746.163	2980.62	2676.43	10	4	5	1.87	1	iTRAQ8plex[+304.20536] (K9); iTRAQ8plex[+304.20536] (K21)	2	1	1.56998e+07	1.56998e+07	0.932056	0.246908	0.492135	0.0105955	rep2	Yes
22	Cluster27630	Peptide	TADGDEGGKHQLITATVNGGK	746.163	2980.62	2980.61	3.09	4	2.61	0	0.95	iTRAQ8plex[+304.20536] (N-term); iTRAQ8plex[+304.20536] (K9); iTRAQ8plex[+304.20536] (K21)	2	1	1.56998e+07	1.56998e+07	0.932056	0.246909	0.492135	0.0105956	rep2	Yes
22	Cluster27630	Peptide	TADGDEGGKHQLITATVNGGK	746.158	2980.6	2980.61	2.68	4	2.61	0	0.95	iTRAQ8plex[+304.20536] (N-term); iTRAQ8plex[+304.20536] (K9); iTRAQ8plex[+304.20536] (K21); Deamidated[+0.984016] (N18)	2	2	3.10077e+07	5.24546e+07	1.08674	0.132335	0.800756	2.66418	rep2	Yes
22	Cluster27630	Peptide	TADGDEGGKHQLITATVNGGK	902.151	2703.43	2703.43	1.89	3	2.41	0	0.95	Delta:H(2)C(2)[+26.01565] (N-term); iTRAQ8plex[+304.20536] (K9); iTRAQ8plex[+304.20536] (K21); Deamidated[+0.984016] (N18)	2	1	5.72754e+06	5.72754e+06	1.00305	0.0962723	71.54	359.298	rep2	Yes
22	Cluster27630	Peptide	WFKGANK	486.959	1457.85	1153.66	10	3	3.13	4.95	1	iTRAQ8plex[+304.20536] (K7)	2	2	3.45825e+07	4.48528e+07	0.984879	4.6516	42.7289	25.9104	rep2	Yes
22	Cluster27630	Peptide	YEDNFDATSNLNVMVTPTDK	961.481	2881.42	2577.22	10	3	6.26	7.77	1	iTRAQ8plex[+304.20536] (K20)	2	53	1.87963e+07	1102754767	0.0139907	0.101123	0.645137	0.262372	rep2	Yes
22	Cluster27630	Peptide	YEDNFDATSNLNVMVTPTDK	1062.55	3184.62	3184.63	2.83	3	2.41	0	0.95	iTRAQ8plex[+304.20536] (N-term); iTRAQ8plex[+304.20536] (K20); iTRAQ8plex[+304.20536] (S9)	2	3	6.07817e+06	5.03217e+07	1.16087	0.066398	0.633339	5.85063	rep2	Yes
22	Cluster27630	Peptide	YEDNFDATSNLNVMVTPTDK	726.149	2900.56	2882.42	1.67	4	2.61	0	0.95	iTRAQ8plex[+304.20536] (N-term); iTRAQ8plex[+304.20536] (K20); Deamidated[+0.984016] (N12)	2	4	9.18343e+06	2.71311e+07	0.901605	0.118187	0.638294	124.838	rep2	Yes
22	Cluster27630	Peptide	YEDNFDATSNLNVMVTPTDK	961.476	2881.41	2577.21	1.28	3	2.41	0	0.95	iTRAQ8plex[+304.20536] (N-term); iTRAQ8plex[+304.20536] (K20)	2	109	6.07076e+06	9.86347e+08	0.976274	0.172855	44.521	0.227385	rep2	Yes
22	Cluster27630	Peptide	YEDNFDATSNLNVMVTPTDK	868.75	2603.23	2603.23	1.27	3	2.41	0	0.95	Delta:H(2)C(2)[+26.01565] (N-term); iTRAQ8plex[+304.20536] (K20)	2	1	3.1385e+06	3.1385e+06	0.891896	0.686446	0.576354	5.14901	rep2	Yes
22	Cluster27630	Peptide	YEDNFDATSNLNVMVTPTDK	955.477	2863.41	2863.41	1.26	3	2.41	0	0.95	iTRAQ8plex[+304.20536] (N-term); iTRAQ8plex[+304.20536] (K20); Glu->pyro-Glu[-18.010565] (T8)	2	1	1.49527e+07	1.49527e+07	0.871259	0.331456	0.651512	0.254676	rep2	Yes
22	Cluster27630	Peptide	YEDNFDATSNLNVMVTPTDK	968.197	2901.57	2901.57	1.24	3	2.41	0	0.95	iTRAQ8plex[+304.20536] (N-term); iTRAQ8plex[+304.20536] (K20); Deamidated[+0.984016] (N10); Deamidated[+0.984016] (N12)	2	1	2.28477e+06	2.28477e+06	0.985913	0.300225	0.670474	0.329646	rep2	Yes
22	Cluster27630	Peptide	YEDNFDATSNLNVMVTPTDKK	1105.58	3313.71	3009.52	10	3	7.47	8.39	1	iTRAQ8plex[+304.20536] (K20); iTRAQ8plex[+304.20536] (K21)	2	32	1.37494e+07	4.23702e+08	0.916898	5.95318	26.0263	0.101173	rep2	Yes
22	Cluster27630	Peptide	YEDNFDATSNLNVMVTPTDKK	1211.98	3632.91	3632.93	3.3	3	2.41	0	0.95	iTRAQ8plex[+304.20536] (N-term); iTRAQ8plex[+304.20536] (K20); iTRAQ8plex[+304.20536] (K21); iTRAQ8plex[+304.20536] (Y1)	2	1	619905	619905	0.955799	5.13423	0.528829	136.203	rep2	Yes
22	Cluster27630	Peptide	YEDNFDATSNLNVMVTPTDKK	1105.58	3313.71	3313.73	2.72	3	2.41	0	0.95	iTRAQ8plex[+304.20536] (N-term); iTRAQ8plex[+304.20536] (K20); iTRAQ8plex[+304.20536] (K21)	2	132	1.37494e+07	1173417424	0.916895	5.95317	26.0263	0.101173	rep2	Yes
22	Cluster27630	Peptide	YEDNFDATSNLNVMVTPTDKK	843.442	3369.73	3369.74	2.61	4	2.61	0	0.95	iTRAQ8plex[+304.20536] (N-term); iTRAQ8plex[+304.20536] (K20); iTRAQ8plex[+304.20536] (K21); Deamidated[+0.984016] (N12)	2	1	1.84272e+07	1.84272e+07	1.02759	0.172838	58.3642	0.0175737	rep2	Yes
22	Cluster27630	Peptide	YEDNFDATSNLNVMVTPTDKK	905.486	3617.91	3617.92	2.54	4	2.61	0	0.95	iTRAQ8plex[+304.20536] (N-term); iTRAQ8plex[+304.20536] (K20); iTRAQ8plex[+304.20536] (K21); iTRAQ8plex[+304.20536] (S9)	2	1	6.6007e+06	6.6007e+06	0.881458	0.0612965	0.690813	0.0305137	rep2	Yes
22	Cluster27630	Peptide	YEDNFDATSNLNVMVTPTDKK	829.973	3315.86	3315.76	2.17	4	2.61	0	0.95	iTRAQ8plex[+304.20536] (N-term); iTRAQ8plex[+304.20536] (K20); iTRAQ8plex[+304.20536] (K21); Deamidated[+0.984016] (N10); Deamidated[+0.984016] (N12)	2	2	1.76652e+07	4.02157e+07	1.73637	1.60047	0.300606	2.03833	rep1	Yes
22	Cluster27630	Peptide	YEDNFDATSNLNVMVTPTDKK	857.945	3427.75	3427.75	1.98	4	2.61	0	0.95	iTRAQ8plex[+304.20536] (N-term); iTRAQ8plex[+304.20536] (K20); iTRAQ8plex[+304.20536] (K21); GlyGly[+114.042927] (T16)	2	1	3.19428e+07	3.19428e+07	3.95491	4.62311	0.25428	1.11263	rep1	Yes
23	Cluster14539	Peptide	AEAVGISVDGLFNK	676.722	2027.15	1722.95	10	3	4.04	5.48	1	iTRAQ8plex[+304.20536] (K14)	2	2	9.46672e+07	1.89505e+08	0.0385706	0.0502605	0.632561	0.253805	rep2	Yes
23	Cluster14539	Peptide	AGVPDLGAAQDLAR	553.309	1656.91	1352.7	10	3	3.88	5.05	1		2	8	4.83607e+07	5.99401e+08	0	0	0	0	rep2	No
23	Cluster14539	Peptide	AGVPDLGAAQDLAR	690.367	1378.72	1378.72	1.74	2	2.31	0	0.95	Delta:H(2)C(2)[+26.01565] (N-term)	2	4	8.76868e+06	3.22666e+07	0	0	0	0	rep2	No
23	Cluster14539	Peptide	AGVPDLGAAQDLAR	829.462	1656.91	1656.91	1.21	2	2.31	0	0.95	iTRAQ8plex[+304.20536] (N-term)	2	2	1.65975e+07	3.35699e+07	0.949178	1.39984	0.107138	2.06634	rep1	Yes
23	Cluster14539	Peptide	AIGNATK	641.898	1281.78	977.581	9.5	2	2.99	3.24	0.95	iTRAQ8plex[+304.20536] (K7)	2	2	9.44415e+07	1.78136e+08	6.41996	5.45978	0.517165	2.17776	rep1	Yes
23	Cluster14539	Peptide	AQEAAEAAK	499.62	1495.84	1191.64	10	3	3.82	5.89	1	iTRAQ8plex[+304.20536] (K9)	2	3	118484179	250735103	0.95739	0.0765036	0.677796	0.016144	rep2	Yes
23	Cluster14539	Peptide	AQEAAEAAK	748.435	1494.85	1191.64	3.36	2	2.31	0	0.95	iTRAQ8plex[+304.20536] (N-term); iTRAQ8plex[+304.20536] (K9)	2	5	2.9752e+07	8.31321e+07	0.985255	0.0712828	0.609385	1.92293	rep2	Yes
23	Cluster14539	Peptide	AVVKPATAAFASK	1087.17	2172.33	1868.13	10	2	4.88	6.85	1	iTRAQ8plex[+304.20536] (K4); iTRAQ8plex[+304.20536] (K13)	2	1	5.34869e+06	5.34869e+06	0.800533	9.3983	0.679391	0.0600504	rep2	Yes
23	Cluster14539	Peptide	AVVKPATAAFASK	1087.17	2172.33	2172.34	2.76	2	2.31	0	0.95	iTRAQ8plex[+304.20536] (N-term); iTRAQ8plex[+304.20536] (K4); iTRAQ8plex[+304.20536] (K13)	2	2	5.34869e+06	8.51622e+06	0.800534	9.3983	0.679389	0.0600504	rep2	Yes
23	Cluster14539	Peptide	DIGSGLSWNTLGSQIATAVQNASETPK	1118.6	3352.77	3048.57	10	3	6.02	7.19	1	iTRAQ8plex[+304.20536] (K27)	2	2	5.12535e+06	3.8595e+07	1.09626	8.18727	37.2087	0.204872	rep2	Yes
23	Cluster14539	Peptide	DIGSGLSWNTLGSQIATAVQNASETPK	907.742	3626.94	3625.94	2.32	4	2.61	0	0.95	iTRAQ8plex[+304.20536] (N-term); iTRAQ8plex[+304.20536] (K27); iTRAQ8plex[+304.20536] (S13)	2	4	3.45198e+06	3.78824e+07	1.05182	0.170027	0.700508	0.13238	rep2	Yes
23	Cluster14539	Peptide	DIGSGLSWNTLGSQIATAVQNASETPK	1118.6	3352.78	3352.79	1.79	3	2.41	0	0.95	iTRAQ8plex[+304.20536] (N-term); iTRAQ8plex[+304.20536] (K27)	2	3	5.12535e+06	4.50191e+07	1.09626	8.18727	37.2084	0.204872	rep2	Yes
23	Cluster14539	Peptide	DPGTVFVAGATGQAGIR	961.026	1920.03	1615.83	10	2	4.76	5.2	0.99		2	1	8.82626e+06	8.82626e+06	0	0	0	0	rep2	No
23	Cluster14539	Peptide	DPGTVFVAGATGQAGIR	961.026	1920.04	1920.04	1.25	2	2.31	0	0.95	iTRAQ8plex[+304.20536] (N-term)	2	1	8.82626e+06	8.82626e+06	3.13582	15.2406	0.617628	4.91009	rep2	Yes
23	Cluster14539	Peptide	EAEAASLAEDAQK	971.018	1940.02	1635.83	10	2	6.36	6.67	1	iTRAQ8plex[+304.20536] (K13)	2	7	2.55108e+07	3.22338e+08	0.978945	6.46088	0.626865	0.0107207	rep2	Yes
23	Cluster14539	Peptide	EAEAASLAEDAQK	971.02	1940.02	1635.82	2.2	2	2.31	0	0.95	iTRAQ8plex[+304.20536] (N-term); iTRAQ8plex[+304.20536] (K13)	2	2	1.93654e+07	2.61404e+07	1.93559	2.23252	0.258985	1.76725	rep1	Yes
23	Cluster14539	Peptide	EAEAASLAEDAQK	831.924	1661.83	1661.83	1.44	2	2.31	0	0.95	Delta:H(2)C(2)[+26.01565] (N-term); iTRAQ8plex[+304.20536] (K13)	2	1	8.49215e+06	8.49215e+06	0.0158827	0.118739	90.3835	158.495	rep2	Yes
23	Cluster14539	Peptide	GDDSEGK	658.348	1314.68	1010.48	9.5	2	2.79	2.41	0.95	iTRAQ8plex[+304.20536] (K7)	2	3	1.57564e+08	5.52613e+08	6.55014	6.48732	0.171272	0.876565	rep1	Yes
23	Cluster14539	Peptide	GDDSEGK	658.347	1314.68	1314.68	2.74	2	2.31	0	0.95	iTRAQ8plex[+304.20536] (N-term); iTRAQ8plex[+304.20536] (K7)	2	6	3.02946e+06	3.38253e+07	1.18778	5.34176	14.3972	106.11	rep2	Yes
23	Cluster14539	Peptide	IAQTLLQR	623.891	1245.77	941.566	10	2	2.98	2.87	0.95		2	3	1.17899e+08	2.74361e+08	0	0	0	0	rep1	No
23	Cluster14539	Peptide	IAQTLLQR	623.891	1245.77	1245.77	2.73	2	2.31	0	0.95	iTRAQ8plex[+304.20536] (N-term)	2	1	3.92966e+07	3.92966e+07	1.11513	0.103706	0.629325	0.0981647	rep2	Yes
23	Cluster14539	Peptide	IASMVADIFANTAVAENK	825.121	2472.34	2168.15	10	3	5.35	7.15	1	iTRAQ8plex[+304.20536] (K18)	2	6	2.77937e+07	147525761	1.07111	0.0482809	25.5582	0.925596	rep2	Yes
23	Cluster14539	Peptide	IASMVADIFANTAVAENK	825.122	2472.34	2472.35	1.46	3	2.41	0	0.95	iTRAQ8plex[+304.20536] (N-term); iTRAQ8plex[+304.20536] (K18)	2	16	2.21238e+07	1.50009e+08	1.11578	6.55051	0.573072	2.29538	rep1	Yes
23	Cluster14539	Peptide	ILSKDEIKR	504.323	2013.26	1709.07	9.5	4	3.56	1.15	0.95	iTRAQ8plex[+304.20536] (K4); iTRAQ8plex[+304.20536] (K8)	2	2	6.54678e+07	9.00084e+07	1.02781	0.128779	0.395477	5.38958	rep1	Yes
23	Cluster14539	Peptide	ILSKDEIKR	672.095	2013.26	2013.27	3.43	3	2.41	0	0.95	iTRAQ8plex[+304.20536] (N-term); iTRAQ8plex[+304.20536] (K4); iTRAQ8plex[+304.20536] (K8)	2	1	2.45406e+07	2.45406e+07	0.0128104	3.64966	0.386118	0.888017	rep1	Yes
23	Cluster14539	Peptide	KAEAVGISVDGLFNK	820.823	2459.45	2459.44	1.59	3	2.41	0	0.95	iTRAQ8plex[+304.20536] (N-term); iTRAQ8plex[+304.20536] (K1); iTRAQ8plex[+304.20536] (K15)	2	4	1.21241e+07	3.90176e+07	1.4773	2.06769	133.189	1.88658	rep1	Yes
23	Cluster14539	Peptide	KDPGTVFVAGATGQAGIR	1177.17	2352.33	2352.33	1.7	2	2.31	0	0.95	iTRAQ8plex[+304.20536] (N-term); iTRAQ8plex[+304.20536] (K1)	2	9	859205	4.8859e+07	0.878882	6.89954	0.0227956	0.163933	rep2	Yes
23	Cluster14539	Peptide	KVFGGLFK	904.577	1807.14	1807.14	3.87	2	2.31	0	0.95	iTRAQ8plex[+304.20536] (N-term); iTRAQ8plex[+304.20536] (K1); iTRAQ8plex[+304.20536] (K8)	2	3	4.01615e+06	2.47256e+07	0.985686	0.0867147	0.650372	3.95188	rep2	Yes
23	Cluster14539	Peptide	LKEPEK	828.523	1655.03	1655.03	3.87	2	2.31	0	0.95	iTRAQ8plex[+304.20536] (N-term); iTRAQ8plex[+304.20536] (K2); iTRAQ8plex[+304.20536] (K6)	2	3	9.0302e+06	3.40715e+07	0.923948	0.104773	0.658581	0.0156546	rep2	Yes
23	Cluster14539	Peptide	LKEPEKEVR	680.755	2039.24	2039.25	3.09	3	2.41	0	0.95	iTRAQ8plex[+304.20536] (N-term); iTRAQ8plex[+304.20536] (K2); iTRAQ8plex[+304.20536] (K6)	2	1	1.69217e+07	1.69217e+07	1.18389	4.60648	65.1224	0.549957	rep2	Yes
23	Cluster14539	Peptide	LNAVESPFQDAESIAK	1164.14	2326.26	2022.06	10	2	6.4	7.27	1	iTRAQ8plex[+304.20536] (K16)	2	5	1.18679e+07	2.51603e+08	0.00562242	0.148806	0.609784	0.0914152	rep2	Yes
23	Cluster14539	Peptide	LNAVESPFQDAESIAK	1164.14	2326.26	2326.26	1.72	2	2.31	0	0.95	iTRAQ8plex[+304.20536] (N-term); iTRAQ8plex[+304.20536] (K16)	2	3	1.18679e+07	4.62158e+07	0.00562241	0.148805	0.609785	0.0914152	rep2	Yes
23	Cluster14539	Peptide	LNAVESPFQDAESIAK	776.755	2327.24	2327.25	1.55	3	2.41	0	0.95	iTRAQ8plex[+304.20536] (N-term); iTRAQ8plex[+304.20536] (K16); Deamidated[+0.984016] (N2)	2	3	4.43122e+06	1.54158e+07	1.00421	0.701212	0.627943	25.2619	rep2	Yes
23	Cluster14539	Peptide	LNAVESPFQDAESIAK	684.025	2049.05	2049.05	0.88	3	2.41	0	0.95	Delta:H(2)C(2)[+26.01565] (N-term); Deamidated[+0.984016] (N2); iTRAQ8plex[+304.20536] (K16)	2	1	1.85212e+07	1.85212e+07	5.09038	51.8035	117.743	11.6168	rep1	Yes
23	Cluster14539	Peptide	LSEKEAEAASLAEDAQK	676.377	2701.47	2397.28	9.5	4	4.15	1.29	0.98	iTRAQ8plex[+304.20536] (K4); iTRAQ8plex[+304.20536] (K17)	2	1	3.45089e+07	3.45089e+07	1.96678	2.18804	0.255656	1.66961	rep1	Yes
23	Cluster14539	Peptide	MYADAMAK	602.803	1203.59	1203.59	1.99	2	2.31	0	0.95	iTRAQ8plex[+304.20536] (N-term); iTRAQ8plex[+304.20536] (K8)	2	1	1.81758e+07	1.81758e+07	1.99392	5.70596	26.3721	0.333898	rep2	Yes
23	Cluster14539	Peptide	QETIYVDDD	701.337	1400.65	1096.46	10	2	2.31	2.26	0.95		2	2	2.79722e+07	3.85207e+07	0	0	0	0	rep1	No
23	Cluster14539	Peptide	QETIYVDDD	853.438	1704.86	1704.86	1.88	2	2.31	0	0.95	iTRAQ8plex[+304.20536] (N-term); iTRAQ8plex[+304.20536] (Y5)	2	1	9.60671e+06	9.60671e+06	1.05419	4.37567	38.5809	0.0251808	rep2	Yes
23	Cluster14539	Peptide	QETIYVDDD	701.335	1400.65	1400.66	1.71	2	2.31	0	0.95	iTRAQ8plex[+304.20536] (N-term)	2	1	1.05485e+07	1.05485e+07	0.431949	5.56572	21.102	129.241	rep2	Yes
23	Cluster14539	Peptide	QTGFQLGKPK	672.748	2015.22	1711.02	9.5	3	4.05	5.48	1	iTRAQ8plex[+304.20536] (K8); iTRAQ8plex[+304.20536] (K10)	2	3	3.3196e+07	1.59387e+08	1.06935	0.0823575	0.343653	9.8495	rep1	Yes
23	Cluster14539	Peptide	QTGFQLGKPK	1008.62	2015.22	2015.22	3.97	2	2.31	0	0.95	iTRAQ8plex[+304.20536] (N-term); iTRAQ8plex[+304.20536] (K8); iTRAQ8plex[+304.20536] (K10)	2	2	1.85409e+06	3.14004e+06	0.804097	6.35533	0.650168	3.60342	rep2	Yes
23	Cluster14539	Peptide	QTGFQLGKPK	848.005	1693.99	1694	2.6	2	2.31	0	0.95	Gln->pyro-Glu[-17.026549] (N-term); iTRAQ8plex[+304.20536] (K8); iTRAQ8plex[+304.20536] (K10)	2	1	1.19474e+07	1.19474e+07	1.06962	0.203556	0.661805	0.0209563	rep2	Yes
23	Cluster14539	Peptide	RKDPGTVFVAGATGQAGIR	628.115	2508.43	2204.23	9.5	4	5.58	2.73	1	iTRAQ8plex[+304.20536] (K2)	2	12	2.95156e+07	4.31376e+07	1.45099	2.57721	32.0492	26.1854	rep1	Yes
23	Cluster14539	Peptide	RKDPGTVFVAGATGQAGIR	628.115	2508.43	2508.45	2.71	4	2.61	0	0.95	iTRAQ8plex[+304.20536] (N-term); iTRAQ8plex[+304.20536] (K2)	2	9	664366	8.35798e+06	0.922899	5.22309	0.604383	0.878589	rep2	Yes
23	Cluster14539	Peptide	RLNAVESPFQDAESIAK	828.463	2482.36	2178.16	10	3	6.05	7.44	1	iTRAQ8plex[+304.20536] (K17)	2	2	1.80315e+07	6.78149e+07	0.947383	0.0582353	0.626261	24.7047	rep2	Yes
23	Cluster14539	Peptide	RLNAVESPFQDAESIAK	828.463	2482.37	2482.36	2.18	3	2.41	0	0.95	iTRAQ8plex[+304.20536] (N-term); iTRAQ8plex[+304.20536] (K17)	2	1	1.80314e+07	1.80314e+07	0.947379	0.0582352	0.626262	24.7047	rep2	Yes
23	Cluster14539	Peptide	SLMPVVTNPSTGLAFGNNR	765.739	2294.19	1989.99	10	3	4.8	6.47	1	Oxidation[+15.994915] (M3)	2	3	1.17942e+08	1.47172e+08	0	0	0	0	rep2	No
23	Cluster14539	Peptide	SLMPVVTNPSTGLAFGNNR	1140.11	2278.2	1974	10	2	5.3	5.53	1		2	3	2.41818e+07	1.26526e+08	0	0	0	0	rep1	No
23	Cluster14539	Peptide	SLMPVVTNPSTGLAFGNNR	646.607	2582.4	2582.4	2.48	4	2.61	0	0.95	iTRAQ8plex[+304.20536] (N-term); iTRAQ8plex[+304.20536] (T7)	2	1	2.30444e+07	2.30444e+07	1.1449	0.24668	0.655713	0.279505	rep2	Yes
23	Cluster14539	Peptide	SLMPVVTNPSTGLAFGNNR	861.81	2582.41	2582.41	2.09	3	2.41	0	0.95	iTRAQ8plex[+304.20536] (N-term); iTRAQ8plex[+304.20536] (S10)	2	1	4.18204e+06	4.18204e+06	84.8855	9.16759	0.56294	5.73302	rep2	Yes
23	Cluster14539	Peptide	SLMPVVTNPSTGLAFGNNR	760.734	2279.18	2279.18	1.32	3	2.41	0	0.95	iTRAQ8plex[+304.20536] (N-term); Deamidated[+0.984016] (N17)	2	1	2.35688e+07	2.35688e+07	1.38344	2.69922	0.337357	1.58184	rep1	Yes
23	Cluster14539	Peptide	SLMPVVTNPSTGLAFGNNR	1140.11	2278.2	2278.2	0.88	2	2.31	0	0.95	iTRAQ8plex[+304.20536] (N-term)	2	2	2.41818e+07	3.06379e+07	1.2661	5.22946	0.489823	1.98183	rep1	Yes
23	Cluster14539	Peptide	SLMPVVTNPSTGLAFGNNR	760.736	2279.18	2279.19	0.66	3	2.41	0	0.95	iTRAQ8plex[+304.20536] (N-term); Deamidated[+0.984016] (N18)	2	7	7.54978e+06	4.93259e+07	0.0625664	43.9283	0.282314	9.02699	rep1	Yes
23	Cluster14539	Peptide	TSLTEDFSPEK	931.5	1860.99	1556.79	10	2	5.2	5.24	0.99	iTRAQ8plex[+304.20536] (K11)	2	3	3.09456e+07	1.66877e+08	1.03054	0.0784404	0.663936	0.0379844	rep2	Yes
23	Cluster14539	Peptide	TSLTEDFSPEK	722.735	2165.18	2165.19	2.49	3	2.41	0	0.95	iTRAQ8plex[+304.20536] (N-term); iTRAQ8plex[+304.20536] (K11); iTRAQ8plex[+304.20536] (S2)	2	1	1.71836e+07	1.71836e+07	1.1317	12.1401	60.1729	0.0633322	rep2	Yes
23	Cluster14539	Peptide	TSLTEDFSPEK	931.501	1860.99	1556.78	2.06	2	2.31	0	0.95	iTRAQ8plex[+304.20536] (N-term); iTRAQ8plex[+304.20536] (K11)	2	3	1.52097e+07	7.48166e+07	1.01461	0.11193	0.650476	0.0743085	rep2	Yes
23	Cluster14539	Peptide	TSLTEDFSPEK	792.406	1582.8	1582.8	1.39	2	2.31	0	0.95	Delta:H(2)C(2)[+26.01565] (N-term); iTRAQ8plex[+304.20536] (K11)	2	1	1.48956e+07	1.48956e+07	0.0121906	3.96996	0.671926	7.04848	rep2	Yes
23	Cluster14539	Peptide	VAATYK	630.89	1259.76	955.564	9.5	2	2.67	2.49	0.95	iTRAQ8plex[+304.20536] (K6)	2	2	8.58712e+07	2.75091e+08	1.15287	4.12747	0.503906	0.295079	rep1	Yes
23	Cluster14539	Peptide	VAATYK	630.887	1259.76	1259.76	3.02	2	2.31	0	0.95	iTRAQ8plex[+304.20536] (N-term); iTRAQ8plex[+304.20536] (K6)	2	5	1.84958e+07	8.92693e+07	1.16363	5.07041	57.6685	1.5159	rep2	Yes
23	Cluster14539	Peptide	VAQTDVAYTLIK	965.575	1929.13	1624.93	10	2	5.64	6.65	1	iTRAQ8plex[+304.20536] (K12)	2	8	1.17617e+07	5.95821e+08	0.996722	0.103039	0.685353	0.0327893	rep2	Yes
23	Cluster14539	Peptide	VAQTDVAYTLIK	965.574	1929.13	1624.94	2.09	2	2.31	0	0.95	iTRAQ8plex[+304.20536] (N-term); iTRAQ8plex[+304.20536] (K12)	2	6	1.76696e+07	7.48223e+07	0.0123275	0.0872651	43.1698	0.0369865	rep2	Yes
23	Cluster14539	Peptide	VFGGLFK	688.429	1374.84	1070.64	10	2	3.16	4.18	0.95	iTRAQ8plex[+304.20536] (K7)	2	5	3.01198e+07	2.71889e+08	0.943968	0.0890882	0.660854	0.11332	rep2	Yes
23	Cluster14539	Peptide	VFGGLFK	536.328	1070.64	1070.64	1.68	2	2.31	0	0.95	iTRAQ8plex[+304.20536] (N-term); iTRAQ8plex[+304.20536] (K7)	2	1	1.33376e+07	1.33376e+07	0.0068196	0.440692	0.670098	243.518	rep2	Yes
23	Cluster14539	Peptide	VQVATVR	538.839	1075.66	771.46	10	2	2.34	1.85	0.95		2	1	3.49725e+08	3.49725e+08	0	0	0	0	rep1	No
23	Cluster14539	Peptide	VVDVSTDPSAPSRPLDELFSVILEDGR	805.177	3216.68	2912.48	10	4	6.01	2.71	1		2	5	1.43008e+08	2.32175e+08	0	0	0	0	rep2	No
23	Cluster14539	Peptide	VVDVSTDPSAPSRPLDELFSVILEDGR	705.181	3520.87	3520.88	2.7	5	2.61	0	0.95	iTRAQ8plex[+304.20536] (N-term); iTRAQ8plex[+304.20536] (S12)	2	1	1.54582e+06	1.54582e+06	0.0392876	0.210277	0.68893	0.74084	rep2	Yes
23	Cluster14539	Peptide	VVDVSTDPSAPSRPLDELFSVILEDGR	805.177	3216.68	3216.68	2.36	4	2.61	0	0.95	iTRAQ8plex[+304.20536] (N-term)	2	2	2.53151e+06	1.10116e+07	1.22354	7.04467	0.0336221	30.2167	rep2	Yes
24	Cluster23220	Peptide	AENVNAAQTTLLAR	888.498	1774.98	1470.78	10	2	5.25	5.52	1		2	7	2.58729e+08	5.48244e+08	0	0	0	0	rep1	No
24	Cluster23220	Peptide	ANSLAQLGK	616.86	1231.7	1231.71	1.46	2	2.31	0	0.95	Delta:H(2)C(2)[+26.01565] (N-term); Deamidated[+0.984016] (N2); iTRAQ8plex[+304.20536] (K9)	2	4	2.98268e+07	6.88991e+07	3.48468	1.41838	54.8479	0.584887	rep1	Yes
24	Cluster23220	Peptide	ATPEQVAAYTLK	950.552	1899.09	1594.89	9.5	2	5.12	6.74	1	iTRAQ8plex[+304.20536] (K12)	2	7	1.17899e+08	4.98144e+08	2.30428	3.87836	0.12435	1.8843	rep1	Yes
24	Cluster23220	Peptide	ATPEQVAAYTLK	735.437	2203.29	2203.29	2.59	3	2.42	0	0.95	iTRAQ8plex[+304.20536] (N-term); iTRAQ8plex[+304.20536] (K12); iTRAQ8plex[+304.20536] (Y9)	2	3	2.52273e+07	3.56753e+07	0.947598	0.0542414	0.604262	0.0274841	rep2	Yes
24	Cluster23220	Peptide	ATPEQVAAYTLK	950.552	1899.09	1899.08	2.21	2	2.31	0	0.95	iTRAQ8plex[+304.20536] (N-term); iTRAQ8plex[+304.20536] (K12)	2	5	5.24805e+06	2.734e+07	0.997387	0.191168	0.594676	3.73822	rep2	Yes
24	Cluster23220	Peptide	ATPEQVAAYTLKLLRNR	744.432	2230.27	2230.28	2.15	3	2.41	0	0.95	iTRAQ8plex[+304.20536] (N-term); iTRAQ8plex[+304.20536] (K12)	2	1	1.05267e+07	1.05267e+07	1.79772	3.53814	18.4857	4.30279	rep1	Yes
24	Cluster23220	Peptide	EAAWGLAR	589.335	1176.65	872.451	10	2	3.19	3.47	0.95		2	4	6.82945e+08	9.19765e+08	0	0	0	0	rep1	No
24	Cluster23220	Peptide	LDSIGLENTEANR	579.309	1734.9	1430.7	10	3	4.56	6	1		2	6	1.47645e+08	4.43445e+08	0	0	0	0	rep1	No
24	Cluster23220	Peptide	RLDSIGLENTEANR	631.342	1891	1586.8	10	3	6.42	7.41	1		2	24	3.93799e+08	8.45832e+08	0	0	0	0	rep1	No
24	Cluster23220	Peptide	RLDSIGLENTEANR	807.412	1612.81	1612.81	2.6	2	2.31	0	0.95	Delta:H(2)C(2)[+26.01565] (N-term)	2	1	6.4132e+06	6.4132e+06	0	0	0	0	rep2	No
24	Cluster23220	Peptide	TAAYYQQGAR	577.782	1153.55	1153.55	1.91	2	2.31	0	0.95	Delta:H(2)C(2)[+26.01565] (N-term)	2	3	2.21626e+07	5.98381e+07	0	0	0	0	rep2	No
24	Cluster23220	Peptide	TAAYYQQGAR	716.877	1431.74	1127.54	10	2	3.89	4.19	0.95		2	8	2.12699e+07	4.751e+08	0	0	0	0	rep1	No
24	Cluster23220	Peptide	YAAISQDSGLVPIVEPEILLDGEHDIDR	1123.59	3367.74	3063.54	10	3	6.72	7.17	1		2	26	5.50197e+07	4.2434e+08	0	0	0	0	rep2	No
25	Cluster36414	Peptide	ADSAAAAPAAAVK	861.502	1720.99	1416.79	2.12	2	2.31	0	0.95	iTRAQ8plex[+304.20536] (N-term); iTRAQ8plex[+304.20536] (K13)	2	9	8.03613e+06	1.72459e+08	129.265	0.385121	0.705938	1090.23	rep2	Yes
25	Cluster36414	Peptide	ADSAAAAPAAAVK	808.451	1614.89	1416.79	1.41	2	2.31	0	0.95	iTRAQ8plex[+304.20536] (K13)	2	21	2.03962e+07	1957410699	1.60686	4.16074	30.0331	61.88	rep1	Yes
25	Cluster36414	Peptide	ADSAAAAPAAAVK	722.403	1442.79	1442.8	1.25	2	2.31	0	0.95	Delta:H(2)C(2)[+26.01565] (N-term); iTRAQ8plex[+304.20536] (K13)	2	2	2.30053e+07	4.2859e+07	0.223643	2.08329	24.6459	0.41198	rep1	Yes
25	Cluster36414	Peptide	ADSAAAAPAAAVK	837.447	1672.88	1672.88	0	2	2.31	0	0.95	iTRAQ8plex[+304.20536] (N-term); iTRAQ8plex[+304.20536] (K13); Glu->pyro-Glu[-18.010565] (D2)	2	1	7.2147e+06	7.2147e+06	0.0715754	125.441	15.3301	10.077	rep1	Yes
25	Cluster36414	Peptide	ADSAAAAPAAAVKEEAPVGFTPPQLDPNTPSPIFAGSTGGLLR	1192.89	4767.51	4463.33	10	4	5.58	2.86	1	iTRAQ8plex[+304.20536] (K13)	2	1	1.4049e+07	1.4049e+07	1.07723	0.163731	0.598024	0.251389	rep2	Yes
25	Cluster36414	Peptide	ADSAAAAPAAAVKEEAPVGFTPPQLDPNTPSPIFAGSTGGLLR	1192.89	4767.53	4767.54	1.68	4	2.61	0	0.95	iTRAQ8plex[+304.20536] (N-term); iTRAQ8plex[+304.20536] (K13)	2	1	1.4049e+07	1.4049e+07	1.07723	0.16373	0.598023	0.251389	rep2	Yes
25	Cluster36414	Peptide	AEKADSAAAAPAAAVK	660.039	1977.09	1977.1	2.43	3	2.41	0	0.95	iTRAQ8plex[+304.20536] (N-term); iTRAQ8plex[+304.20536] (K3); iTRAQ8plex[+304.20536] (K16)	2	4	1.92892e+07	6.11344e+07	54.4735	7.31977	0.219806	0.462978	rep2	Yes
25	Cluster36414	Peptide	AEKADSAAAAPAAAVK	674.39	2020.15	2020.15	2.38	3	2.41	0	0.95	Carbamyl[+43.005814] (N-term); iTRAQ8plex[+304.20536] (K3); iTRAQ8plex[+304.20536] (K16)	2	1	2.73999e+07	2.73999e+07	1.00903	5.11407	37.2783	0.666628	rep2	Yes
25	Cluster36414	Peptide	AQVEEFYVITWNSPK	908.513	2722.52	2722.5	2.09	3	2.41	0	0.95	iTRAQ8plex[+304.20536] (N-term); iTRAQ8plex[+304.20536] (K15); iTRAQ8plex[+304.20536] (Y7)	2	3	4.09777e+06	4.5531e+07	1.04769	0.193922	0.578882	0.0563833	rep2	Yes
25	Cluster36414	Peptide	AQVEEFYVITWNSPK	681.633	2722.5	2722.5	1.62	4	2.61	0	0.95	iTRAQ8plex[+304.20536] (N-term); iTRAQ8plex[+304.20536] (K15); iTRAQ8plex[+304.20536] (T10)	2	5	2.13326e+07	6.62648e+07	1.79662	1.18592	0.360087	3.7661	rep1	Yes
25	Cluster36414	Peptide	DGVYPEK	708.402	1414.79	1110.59	9.5	2	2.98	2.76	0.95	iTRAQ8plex[+304.20536] (K7)	2	6	3.24148e+07	1201255287	21.4385	8.77133	0.103283	3.38691	rep1	Yes
25	Cluster36414	Peptide	DGVYPEK	860.502	1718.99	1718.99	2.68	2	2.31	0	0.95	iTRAQ8plex[+304.20536] (N-term); iTRAQ8plex[+304.20536] (K7); iTRAQ8plex[+304.20536] (Y4)	2	1	5.08346e+06	5.08346e+06	1.39341	0.186762	0.638012	755.055	rep2	Yes
25	Cluster36414	Peptide	DGVYPEK	708.398	1414.78	1414.78	2.54	2	2.31	0	0.95	iTRAQ8plex[+304.20536] (N-term); iTRAQ8plex[+304.20536] (K7)	2	9	2.93599e+07	1.33244e+08	86.5183	0.212472	0.650827	1.72681	rep2	Yes
25	Cluster36414	Peptide	DGVYPEKANAGR	811.929	1621.84	1317.63	10	2	3.81	3.48	0.95	Acetyl[+42.010565] (K7)	2	2	5.73815e+06	4.1331e+07	0	0	0	0	rep1	No
25	Cluster36414	Peptide	EEAPVGFTPPQLDPNTPSPIFAGSTGGLLR	1022.18	3063.52	3063.52	0	3	2.42	0	0.95	Glu->pyro-Glu[-18.010565] (N-term)	2	2	1.61743e+06	3.3381e+06	0	0	0	0	rep1	No
25	Cluster36414	Peptide	EEAPVGFTPPQLDPNTPSPIFAGSTGGLLR	1123.92	3368.76	3064.55	10	3	6.14	7.7	1		2	45	1.50227e+07	1.42625e+09	0	0	0	0	rep2	No
25	Cluster36414	Peptide	EEAPVGFTPPQLDPNTPSPIFAGSTGGLLR	1225.33	3672.95	3672.96	2.45	3	2.41	0	0.95	iTRAQ8plex[+304.20536] (N-term); iTRAQ8plex[+304.20536] (S24)	2	2	4.69786e+06	1.38248e+07	1.15296	0.179623	0.626491	0.349507	rep2	Yes
25	Cluster36414	Peptide	EEAPVGFTPPQLDPNTPSPIFAGSTGGLLR	918.995	3671.95	3672.97	2.18	4	2.61	0	0.95	iTRAQ8plex[+304.20536] (N-term); iTRAQ8plex[+304.20536] (S18)	2	1	1.05154e+07	1.05154e+07	1.34718	0.820657	11.1557	71.6846	rep1	Yes
25	Cluster36414	Peptide	EEAPVGFTPPQLDPNTPSPIFAGSTGGLLR	852.683	3406.7	3406.71	1.41	4	2.61	0	0.95	iTRAQ8plex[+304.20536] (N-term); Cation:K[+37.955882] (D13)	2	1	2.52404e+07	2.52404e+07	0.0484449	0.360651	0.71657	2.1909	rep2	Yes
25	Cluster36414	Peptide	EEAPVGFTPPQLDPNTPSPIFAGSTGGLLR	856.425	3421.67	3468.77	1.15	4	2.61	0	0.95	iTRAQ8plex[+304.20536] (N-term); Deamidated[+0.984016] (N15)	2	7	1.6555e+07	6.74015e+07	0.0241232	6.49113	54.6189	193.561	rep1	Yes
25	Cluster36414	Peptide	EEAPVGFTPPQLDPNTPSPIFAGSTGGLLR	1123.92	3368.75	3064.55	0.98	3	2.41	0	0.95	iTRAQ8plex[+304.20536] (N-term)	2	102	1.53226e+07	7.95394e+08	0.114105	0.539675	26.6061	0.486829	rep1	Yes
25	Cluster36414	Peptide	EEAPVGFTPPQLDPNTPSPIFAGSTGGLLR	1117.92	3350.75	3350.75	0.9	3	2.41	0	0.95	iTRAQ8plex[+304.20536] (N-term); Glu->pyro-Glu[-18.010565] (E2)	2	1	4.84331e+06	4.84331e+06	0.0498392	0.276689	0.940599	21.4787	rep2	Yes
25	Cluster36414	Peptide	EEAPVGFTPPQLDPNTPSPIFAGSTGGLLR	1128.6	3382.78	3382.78	0.89	3	2.41	0	0.95	iTRAQ8plex[+304.20536] (N-term); Pro->pyro-Glu[+13.979265] (E1)	2	1	2.21679e+07	2.21679e+07	0.214206	0.0670305	0.631731	0.865981	rep2	Yes
25	Cluster36414	Peptide	EGPNLLK	689.927	1377.84	1073.64	9.5	2	2.95	3.38	0.95	iTRAQ8plex[+304.20536] (K7)	2	7	4.59263e+07	1399686744	1.01565	33.5561	0.136122	0.345567	rep1	Yes
25	Cluster36414	Peptide	EGPNLLK	689.925	1377.83	1377.83	2.76	2	2.31	0	0.95	iTRAQ8plex[+304.20536] (N-term); iTRAQ8plex[+304.20536] (K7)	2	7	956820	6.58504e+07	1.05441	0.217771	0.626187	0.0822983	rep2	Yes
25	Cluster36414	Peptide	EGPNLLKLAR	472.293	1413.86	1109.66	10	3	3.78	5.36	1		2	3	3.83082e+07	1.01418e+08	0	0	0	0	rep1	No
25	Cluster36414	Peptide	EGPNLLKLAR	486.309	1455.9	1151.7	10	3	3.99	3.53	0.95	Methyl[+14.01565] (K7); Dimethyl[+28.0313] (R10)	2	1	2.45888e+07	2.45888e+07	0	0	0	0	rep1	No
25	Cluster36414	Peptide	EGPNLLKLAR	573.694	1718.06	1413.86	9.5	3	3.22	3.07	0.95	iTRAQ8plex[+304.20536] (K7)	2	1	83088519	83088519	1.35475	3.19911	0.239384	2.95825	rep1	Yes
25	Cluster36414	Peptide	EGPNLLKLAR	472.293	1413.86	1441.85	2.5	3	2.41	0	0.95	iTRAQ8plex[+304.20536] (N-term); iTRAQ8plex[+304.20536] (K7)	2	3	2.91271e+07	8.9584e+07	1.30557	0.121178	42.4557	0.194988	rep2	Yes
25	Cluster36414	Peptide	EGVGQNMR	398.877	1193.61	889.408	10	3	3.15	4.49	1		2	4	3.39771e+07	8.22252e+08	0	0	0	0	rep2	No
25	Cluster36414	Peptide	EGVGQNMR	597.813	1193.61	1193.61	2.01	2	2.31	0	0.95	iTRAQ8plex[+304.20536] (N-term)	2	5	3.53482e+06	3.75015e+07	1.39357	0.0221503	66.02	7.0063	rep1	Yes
25	Cluster36414	Peptide	EQCLALGTR	670.85	1339.68	1035.49	3.09	2	2.31	0	0.95	iTRAQ8plex[+304.20536] (N-term); Methylthio (C3)	2	3	3.153e+07	8.39226e+07	1.80966	5.75132	0.54303	0.649873	rep1	Yes
25	Cluster36414	Peptide	EQIFEMPTGGAAIMR	663.001	1985.98	1681.78	10	3	3.26	2.82	0.95	Oxidation[+15.994915] (M6); Oxidation[+15.994915] (M14)	2	8	4.49545e+07	5.00064e+08	0	0	0	0	rep2	No
25	Cluster36414	Peptide	EQIFEMPTGGAAIMR	833.898	1665.78	1665.79	2.48	2	3.53	3.42	0.95	Oxidation[+15.994915] (M6)	2	7	1.51102e+07	4.24149e+08	0	0	0	0	rep2	No
25	Cluster36414	Peptide	EQIFEMPTGGAAIMR	833.9	1665.78	1665.79	0.6	2	3.44	3.95	0.95	Oxidation[+15.994915] (M14)	2	7	7.77134e+06	4.48307e+08	0	0	0	0	rep1	No
25	Cluster36414	Peptide	EQIFEMPTGGAAIMR	978.004	1953.99	1649.79	10	2	4.5	4.19	0.95		2	10	2.37002e+08	8.7744e+08	0	0	0	0	rep1	No
25	Cluster36414	Peptide	EQIFEMPTGGAAIMR	753.739	2258.19	2258.2	2.26	3	2.41	0	0.95	iTRAQ8plex[+304.20536] (N-term); iTRAQ8plex[+304.20536] (T8)	2	1	6.92134e+06	6.92134e+06	118.168	3.22074	0.660962	35.1425	rep2	Yes
25	Cluster36414	Peptide	EQIFEMPTGGAAIMR	978.003	1953.99	1649.79	2.06	2	2.31	0	0.95	iTRAQ8plex[+304.20536] (N-term)	2	11	2.61443e+07	1.27342e+08	0.011564	0.078765	0.638961	0.084188	rep2	Yes
25	Cluster36414	Peptide	INYQFYR	502.253	1002.49	1002.49	1.04	2	2.76	2.99	0.95		2	5	6.09064e+07	2.72783e+08	0	0	0	0	rep1	No
25	Cluster36414	Peptide	INYQFYR	515.262	1028.51	1028.51	1.75	2	2.31	0	0.95	Delta:H(2)C(2)[+26.01565] (N-term)	2	1	2.47672e+07	2.47672e+07	0	0	0	0	rep2	No
25	Cluster36414	Peptide	INYQFYR	806.457	1610.9	1610.9	3.85	2	2.31	0	0.95	iTRAQ8plex[+304.20536] (N-term); iTRAQ8plex[+304.20536] (Y3)	2	2	4.5168e+06	1.25172e+07	1.14388	0.207019	0.648086	0.0222125	rep2	Yes
25	Cluster36414	Peptide	INYQFYR	537.973	1610.9	1610.9	3.35	3	2.41	0	0.95	iTRAQ8plex[+304.20536] (N-term); iTRAQ8plex[+304.20536] (Y6)	2	10	4.9209e+06	9.55879e+07	1.65133	7.48597	0.393133	0.0173118	rep1	Yes
25	Cluster36414	Peptide	INYQFYR	654.356	1306.7	1306.69	2.76	2	2.31	0	0.95	iTRAQ8plex[+304.20536] (N-term)	2	32	2.86512e+07	3.58641e+08	0.565439	0.151511	0.645806	32.5837	rep2	Yes
25	Cluster36414	Peptide	INYQFYR	806.948	1611.88	1611.88	2.61	2	2.31	0	0.95	iTRAQ8plex[+304.20536] (N-term); iTRAQ8plex[+304.20536] (Y6); Deamidated[+0.984016] (N2)	2	2	2.75522e+06	3.08998e+07	116.151	0.0838739	0.669014	5.68249	rep2	Yes
25	Cluster36414	Peptide	INYQFYR	654.844	1307.67	1307.68	2.45	2	2.31	0	0.95	iTRAQ8plex[+304.20536] (N-term); Deamidated[+0.984016] (N2)	2	4	8.05467e+06	7.01319e+07	0.00875473	0.104707	56.3606	14.2279	rep2	Yes
25	Cluster36414	Peptide	KEQCLALGTR	886.999	1771.98	1773.98	2.71	2	2.31	0	0.95	iTRAQ8plex[+304.20536] (N-term); iTRAQ8plex[+304.20536] (K1); Methylthio (C4)	2	23	1.95875e+07	4.27171e+08	1.27346	0.0971685	0.653002	0.01901	rep2	Yes
25	Cluster36414	Peptide	NVSPIEVK	747.457	1492.9	1188.7	10	2	3.84	4.45	0.96	iTRAQ8plex[+304.20536] (K8)	2	38	5.95759e+07	6185418819	0.0102071	0.0881821	0.621179	0.00930266	rep2	Yes
25	Cluster36414	Peptide	NVSPIEVK	899.561	1797.11	1797.11	3.9	2	2.31	0	0.95	iTRAQ8plex[+304.20536] (N-term); iTRAQ8plex[+304.20536] (K8); iTRAQ8plex[+304.20536] (S3)	2	2	2.03127e+06	3.22628e+06	0.970314	0.279787	0.668942	5.71558	rep2	Yes
25	Cluster36414	Peptide	NVSPIEVK	505.968	1514.88	1514.89	2.97	3	2.41	0	0.95	iTRAQ8plex[+304.20536] (N-term); iTRAQ8plex[+304.20536] (K8); Cation:Na[+21.981943] (E6)	2	1	3.54874e+07	3.54874e+07	1.43688	0.12694	0.602884	0.00952369	rep2	Yes
25	Cluster36414	Peptide	NVSPIEVK	747.453	1492.89	1492.9	2.68	2	2.31	0	0.95	iTRAQ8plex[+304.20536] (N-term); iTRAQ8plex[+304.20536] (K8)	2	35	9.68085e+06	3.44607e+08	1.06018	0.0801716	0.638402	3.52967	rep2	Yes
25	Cluster36414	Peptide	NVSPIEVKFTGK	643.051	1926.13	1621.93	10	3	4.1	4.18	1	iTRAQ8plex[+304.20536] (K12)	2	1	1.18683e+07	1.18683e+07	69.6382	0.435862	0.641312	8.17526	rep2	Yes
25	Cluster36414	Peptide	NVSPIEVKFTGK	643.051	1926.13	1926.13	2.34	3	2.41	0	0.95	iTRAQ8plex[+304.20536] (N-term); iTRAQ8plex[+304.20536] (K8); iTRAQ8plex[+304.20536] (K12)	2	1	1.18683e+07	1.18683e+07	69.6381	0.43586	0.641314	8.17526	rep2	Yes
25	Cluster36414	Peptide	SIGKNVSPIEVK	641.059	1920.15	1615.95	10	3	4.72	3.77	0.97	Acetyl[+42.010565] (K4); iTRAQ8plex[+304.20536] (K12)	2	2	2.12023e+07	1.18575e+08	0.864589	0.119987	49.4839	5.14277	rep2	Yes
25	Cluster36414	Peptide	SIGKNVSPIEVK	641.059	1920.15	1920.16	3.12	3	2.41	0	0.95	iTRAQ8plex[+304.20536] (N-term); iTRAQ8plex[+304.20536] (K4); iTRAQ8plex[+304.20536] (K12)	2	1	2.12023e+07	2.12023e+07	0.86459	0.119987	49.4838	5.14278	rep2	Yes
25	Cluster36414	Peptide	VFPNGEVQYLHPK	712.738	2135.19	1830.99	9.5	3	5.07	7.28	1	iTRAQ8plex[+304.20536] (K13)	2	6	6.79511e+07	2.58113e+08	1.45859	1.63552	0.194592	2.33466	rep1	Yes
25	Cluster36414	Peptide	VFPNGEVQYLHPK	720.392	2158.15	2158.16	3.75	3	2.41	0	0.95	iTRAQ8plex[+304.20536] (N-term); iTRAQ8plex[+304.20536] (K13); Deamidated[+0.984016] (N4); Cation:Na[+21.981943] (E6)	2	1	5.44378e+06	5.44378e+06	0.0116363	0.063156	0.696488	15.6737	rep2	Yes
25	Cluster36414	Peptide	VFPNGEVQYLHPK	707.062	2118.16	2118.17	3.12	3	2.41	0	0.95	iTRAQ8plex[+304.20536] (N-term); iTRAQ8plex[+304.20536] (K13); Gln->pyro-Glu[-17.026549] (N4)	2	5	5.04754e+06	6.23246e+07	122.886	9.44061	0.375532	5.14216	rep1	Yes
25	Cluster36414	Peptide	VFPNGEVQYLHPK	712.739	2135.19	2135.17	2.95	3	2.41	0	0.95	iTRAQ8plex[+304.20536] (N-term); iTRAQ8plex[+304.20536] (K13)	2	4	8.63207e+06	4.43249e+07	0.971949	0.599055	142.202	10.5951	rep2	Yes
25	Cluster36414	Peptide	VFPNGEVQYLHPK	707.064	2118.17	2118.18	2.83	3	2.41	0	0.95	iTRAQ8plex[+304.20536] (N-term); iTRAQ8plex[+304.20536] (K13); Deamidated[+0.984016] (N4); Glu->pyro-Glu[-18.010565] (E6)	2	1	1.08377e+07	1.08377e+07	0.560506	7.84938	39.9215	10.8997	rep2	Yes
25	Cluster36414	Peptide	VFPNGEVQYLHPK	814.467	2440.38	2440.38	2.34	3	2.41	0	0.95	iTRAQ8plex[+304.20536] (N-term); iTRAQ8plex[+304.20536] (K13); iTRAQ8plex[+304.20536] (Y9); Deamidated[+0.984016] (N4)	2	1	4.30591e+06	4.30591e+06	1.03816	0.310322	0.592686	0.0624519	rep2	Yes
25	Cluster36414	Peptide	VFPNGEVQYLHPK	930.002	1857.99	1857.99	2.15	2	2.31	0	0.95	Delta:H(2)C(2)[+26.01565] (N-term); Deamidated[+0.984016] (N4); iTRAQ8plex[+304.20536] (K13)	2	1	8.60237e+06	8.60237e+06	0.0163655	5.02796	66.9493	10.7122	rep1	Yes
25	Cluster36414	Peptide	VFPNGEVQYLHPK	1069.1	2136.18	2136.18	1.87	2	2.31	0	0.95	iTRAQ8plex[+304.20536] (N-term); iTRAQ8plex[+304.20536] (K13); Deamidated[+0.984016] (N4)	2	34	7.77707e+06	2.62267e+08	1.20801	2.58196	0.660253	0.0320702	rep2	Yes
25	Cluster36414	Peptide	YKINYQFYR	436.899	1307.68	1307.67	8.06	3	2.49	2.69	0.95	Methyl[+14.01565] (K2)	2	1	1.53938e+07	1.53938e+07	0	0	0	0	rep2	No
26	Cluster19112	Peptide	AAAGPLK	618.398	1234.78	930.581	9.5	2	3.06	4.17	0.95	iTRAQ8plex[+304.20536] (K7)	2	3	2.70188e+08	5.38634e+08	1.07114	3.66135	0.528427	0.313695	rep1	Yes
26	Cluster19112	Peptide	AAAGPLK	618.398	1234.78	1234.78	3.08	2	2.31	0	0.95	iTRAQ8plex[+304.20536] (N-term); iTRAQ8plex[+304.20536] (K7)	2	2	1.8589e+07	3.95562e+07	1.14349	5.41079	59.2593	0.260309	rep2	Yes
26	Cluster19112	Peptide	AAALNIVPTSTGAAK	997.096	1992.18	1687.98	10	2	4.63	5.77	1	iTRAQ8plex[+304.20536] (K15)	2	16	9.56101e+07	1121719232	87.671	0.0362423	0.530522	4.06005	rep2	Yes
26	Cluster19112	Peptide	AAALNIVPTSTGAAK	766.468	2296.38	2296.39	2.61	3	2.41	0	0.95	iTRAQ8plex[+304.20536] (N-term); iTRAQ8plex[+304.20536] (K15); iTRAQ8plex[+304.20536] (T9)	2	1	2.10766e+07	2.10766e+07	0.980875	0.142129	0.553087	0.0123054	rep2	Yes
26	Cluster19112	Peptide	AAALNIVPTSTGAAK	997.096	1992.18	1992.18	2.51	2	2.31	0	0.95	iTRAQ8plex[+304.20536] (N-term); iTRAQ8plex[+304.20536] (K15)	2	8	2.82855e+06	4.92426e+07	56.1925	0.0904863	0.614041	386.303	rep2	Yes
26	Cluster19112	Peptide	AVSLVLPQLK	838.546	1675.08	1370.88	10	2	4.25	6.55	1	iTRAQ8plex[+304.20536] (K10)	2	6	3.81169e+07	5.93273e+08	0.917793	0.070796	0.546183	0.0918474	rep2	Yes
26	Cluster19112	Peptide	AVSLVLPQLK	660.769	1979.28	1979.29	3.03	3	2.41	0	0.95	iTRAQ8plex[+304.20536] (N-term); iTRAQ8plex[+304.20536] (K10); iTRAQ8plex[+304.20536] (S3)	2	2	8.13604e+06	2.81004e+07	1.08704	5.93939	39.9827	0.124949	rep2	Yes
26	Cluster19112	Peptide	AVSLVLPQLK	559.367	1675.08	1675.08	2.87	3	2.41	0	0.95	iTRAQ8plex[+304.20536] (N-term); iTRAQ8plex[+304.20536] (K10)	2	1	1.80287e+07	1.80287e+07	1.06028	0.448036	56.3152	0.0186008	rep2	Yes
26	Cluster19112	Peptide	DSPLEVVVLNDSGGVK	1118.63	2235.25	1931.05	10	2	6.35	7.49	1	iTRAQ8plex[+304.20536] (K16)	2	3	1.0428e+07	1.47051e+08	0.847222	0.103394	0.553778	0.0315584	rep2	Yes
26	Cluster19112	Peptide	DSPLEVVVLNDSGGVK	635.87	2539.45	2539.46	2.52	4	2.61	0	0.95	iTRAQ8plex[+304.20536] (N-term); iTRAQ8plex[+304.20536] (K16); iTRAQ8plex[+304.20536] (S12)	2	1	1.57992e+07	1.57992e+07	1.06507	0.266719	0.601062	0.220238	rep2	Yes
26	Cluster19112	Peptide	DSPLEVVVLNDSGGVK	1118.63	2235.25	2235.26	1.79	2	2.31	0	0.95	iTRAQ8plex[+304.20536] (N-term); iTRAQ8plex[+304.20536] (K16)	2	1	1.0428e+07	1.0428e+07	0.847219	0.103394	0.553778	0.0315584	rep2	Yes
26	Cluster19112	Peptide	DSPLEVVVLNDSGGVK	979.542	1957.07	1957.07	0.41	2	2.31	0	0.95	Delta:H(2)C(2)[+26.01565] (N-term); iTRAQ8plex[+304.20536] (K16)	2	1	3.24962e+06	3.24962e+06	1.3379	0.170858	0.309393	5.29581	rep1	Yes
26	Cluster19112	Peptide	GKLNGIALR	388.5	1549.97	1549.97	3.1	4	2.61	0	0.95	iTRAQ8plex[+304.20536] (N-term); iTRAQ8plex[+304.20536] (K2); Deamidated[+0.984016] (N4)	2	3	1.03183e+07	4.75238e+07	99.9989	0.0452098	51.3892	4.52136	rep2	Yes
26	Cluster19112	Peptide	GLTAEDVNEAFR	813.424	1624.83	1320.63	10	2	4.33	4.71	0.98		2	6	2.52443e+08	4.53729e+08	0	0	0	0	rep1	No
26	Cluster19112	Peptide	GLTAEDVNEAFR	813.425	1624.83	1624.84	2.34	2	2.31	0	0.95	iTRAQ8plex[+304.20536] (N-term)	2	4	1.22374e+07	31392108	0.935673	0.150552	36.3906	0.0799313	rep2	Yes
26	Cluster19112	Peptide	GLTAEDVNEAFR	813.916	1625.82	1625.82	1.35	2	2.31	0	0.95	iTRAQ8plex[+304.20536] (N-term); Deamidated[+0.984016] (N8)	2	2	7.6601e+06	3.84259e+07	70.5136	0.202047	0.60455	16.4475	rep2	Yes
26	Cluster19112	Peptide	GLTAEDVNEAFRK	686.717	2057.13	1752.93	9.5	3	4.71	6	1	iTRAQ8plex[+304.20536] (K13)	2	1	2.56446e+07	2.56446e+07	0.736831	0.621395	0.152621	1.61495	rep1	Yes
26	Cluster19112	Peptide	GTMTTTHSYTGDQR	625.964	1874.87	1570.67	10	3	4.4	6.97	1	Oxidation[+15.994915] (M3)	2	15	3.47603e+07	4.54864e+08	0	0	0	0	rep2	No
26	Cluster19112	Peptide	GTMTTTHSYTGDQR	830.355	1658.69	1658.7	1.45	2	2.31	0	0.95	Acetyl[+42.010565] (N-term)	2	1	4.623e+06	4.623e+06	0	0	0	0	rep2	No
26	Cluster19112	Peptide	GTMTTTHSYTGDQR	930.447	1858.88	1554.67	10	2	5.79	7.09	1		2	12	2.06474e+06	1.93223e+08	0	0	0	0	rep1	No
26	Cluster19112	Peptide	GTMTTTHSYTGDQR	930.445	1858.88	1858.88	2.58	2	2.31	0	0.95	iTRAQ8plex[+304.20536] (N-term)	2	8	3.83179e+06	5.71916e+07	1.19243	0.39482	0.624188	3.80222	rep2	Yes
26	Cluster19112	Peptide	GTMTTTHSYTGDQR	1082.55	2163.08	2163.08	1.85	2	2.31	0	0.95	iTRAQ8plex[+304.20536] (N-term); iTRAQ8plex[+304.20536] (Y9)	2	2	2.11949e+06	3.89171e+06	0.920931	0.14428	0.564416	3.97233	rep2	Yes
26	Cluster19112	Peptide	GVLEVCDTPLVSCDFR	717.007	2148	2148	1.68	3	2.41	0	0.95	iTRAQ8plex[+304.20536] (N-term); Methylthio (C6); Methylthio (C13)	2	4	1.72623e+07	4.79834e+07	0.0321382	0.0638679	0.625255	0.829787	rep2	Yes
26	Cluster19112	Peptide	HIQAGASK	473.954	1418.84	1114.64	9.5	3	4.11	5.19	1	iTRAQ8plex[+304.20536] (K8)	2	5	2.26341e+08	6.94817e+08	142.822	0.0916858	0.345104	0.457199	rep1	Yes
26	Cluster19112	Peptide	HIQAGASK	710.426	1418.84	1418.84	3.66	2	2.31	0	0.95	iTRAQ8plex[+304.20536] (N-term); iTRAQ8plex[+304.20536] (K8)	2	3	2.79909e+06	4.57561e+07	0.0383008	3.14791	20.6603	348.485	rep2	Yes
26	Cluster19112	Peptide	IVDNETISVDGK	949.535	1897.06	1592.86	10	2	5.43	6.33	1	iTRAQ8plex[+304.20536] (K12)	2	4	3.6452e+07	1.08189e+08	0.00635247	0.0677856	0.558107	0.0211756	rep2	Yes
26	Cluster19112	Peptide	IVDNETISVDGK	949.536	1897.06	1592.85	2.13	2	2.31	0	0.95	iTRAQ8plex[+304.20536] (N-term); iTRAQ8plex[+304.20536] (K12)	2	4	9.5593e+06	5.40009e+07	1.00783	0.0926276	62.9367	0.0408897	rep2	Yes
26	Cluster19112	Peptide	IVDNETISVDGK	633.686	1898.03	1898.04	2.05	3	2.41	0	0.95	iTRAQ8plex[+304.20536] (N-term); iTRAQ8plex[+304.20536] (K12); Deamidated[+0.984016] (N4)	2	2	6.30497e+06	1.09398e+07	0.010378	0.134399	0.587011	4.11811	rep2	Yes
26	Cluster19112	Peptide	KDSPLEVVVLNDSGGVK	890.519	2668.53	2668.54	2.59	3	2.41	0	0.95	iTRAQ8plex[+304.20536] (N-term); iTRAQ8plex[+304.20536] (K1); iTRAQ8plex[+304.20536] (K17); Deamidated[+0.984016] (N11)	2	1	8.10613e+06	8.10613e+06	1.07855	0.0664238	18.4701	4.21859	rep2	Yes
26	Cluster19112	Peptide	KDSPLEVVVLNDSGGVK	1334.79	2667.56	2667.56	1.5	2	2.31	0	0.95	iTRAQ8plex[+304.20536] (N-term); iTRAQ8plex[+304.20536] (K1); iTRAQ8plex[+304.20536] (K17)	2	2	1.72311e+06	1.02484e+07	1.19566	6.02715	0.246583	293.979	rep1	Yes
26	Cluster19112	Peptide	KGLTAEDVNEAFR	1029.57	2057.13	1778.94	2.25	2	2.31	0	0.95	iTRAQ8plex[+304.20536] (N-term); iTRAQ8plex[+304.20536] (K1)	2	9	4.00138e+06	1.48169e+08	0.00996364	6.63082	83.6902	0.0842763	rep1	Yes
26	Cluster19112	Peptide	KGLTAEDVNEAFR	1030.07	2058.12	2058.12	1.94	2	2.31	0	0.95	iTRAQ8plex[+304.20536] (N-term); iTRAQ8plex[+304.20536] (K1); Deamidated[+0.984016] (N9)	2	1	622364	622364	1.21081	1.96967	14.6483	5.71235	rep2	Yes
26	Cluster19112	Peptide	LLDASHR	372.553	1114.64	810.435	10	3	2.84	3.17	0.95		2	2	7.10209e+08	1.00049e+09	0	0	0	0	rep1	No
26	Cluster19112	Peptide	LLDASHR	710.427	1418.84	1418.84	2.54	2	2.31	0	0.95	iTRAQ8plex[+304.20536] (N-term); iTRAQ8plex[+304.20536] (H6)	2	1	1.83171e+07	1.83171e+07	2.20279	2.53668	0.423505	128.032	rep1	Yes
26	Cluster19112	Peptide	LLDASHR	558.325	1114.64	1114.64	2.51	2	2.31	0	0.95	iTRAQ8plex[+304.20536] (N-term)	2	4	2.59422e+07	1.02501e+08	1.09586	3.71882	90.6662	1.34114	rep2	Yes
26	Cluster19112	Peptide	LNGIALR	530.842	1059.67	755.465	10	2	2.49	2	0.95		2	1	8.63849e+07	8.63849e+07	0	0	0	0	rep1	No
26	Cluster19112	Peptide	LNGIALR	531.333	1060.65	1060.65	1.7	2	2.31	0	0.95	iTRAQ8plex[+304.20536] (N-term); Deamidated[+0.984016] (N2)	2	7	5.11602e+06	4.28864e+07	1.01913	0.181736	0.62007	0.281756	rep2	Yes
26	Cluster19112	Peptide	NASHLLK	695.933	1389.85	1085.65	9.5	2	3.14	4.32	0.95	iTRAQ8plex[+304.20536] (K7)	2	4	1.20112e+07	1.55218e+08	1.12796	4.44993	21.1092	117.166	rep1	Yes
26	Cluster19112	Peptide	NASHLLK	695.932	1389.85	1389.85	3.74	2	2.31	0	0.95	iTRAQ8plex[+304.20536] (N-term); iTRAQ8plex[+304.20536] (K7)	2	3	1.57673e+07	4.44572e+07	0.786552	4.78027	42.042	590.935	rep2	Yes
26	Cluster19112	Peptide	NASHLLK	464.617	1390.83	1390.83	2.37	3	2.41	0	0.95	iTRAQ8plex[+304.20536] (N-term); iTRAQ8plex[+304.20536] (K7); Deamidated[+0.984016] (N1)	2	2	1.66366e+07	4.59205e+07	63.6236	0.0659626	39.4367	4.09842	rep2	Yes
26	Cluster19112	Peptide	NASHLLK	848.032	1694.05	1694.05	2.24	2	2.31	0	0.95	iTRAQ8plex[+304.20536] (N-term); iTRAQ8plex[+304.20536] (K7); iTRAQ8plex[+304.20536] (S3)	2	1	2.26036e+06	2.26036e+06	1.23339	0.730877	0.6032	141.093	rep2	Yes
26	Cluster19112	Peptide	TNPADEECK	678.806	1355.6	1355.6	1.33	2	2.31	0	0.95	iTRAQ8plex[+304.20536] (N-term); iTRAQ8plex[+304.20536] (K9); Methylthio (C8)	2	2	2.70939e+07	4.99165e+07	1.66019	3.12351	0.144973	1.78886	rep1	Yes
26	Cluster19112	Peptide	TNPADEECK	691.813	1381.61	1381.61	1.3	2	2.31	0	0.95	Delta:H(2)C(2)[+26.01565] (N-term); Methylthio (C8); iTRAQ8plex[+304.20536] (K9)	2	2	2.61547e+07	5.10436e+07	0.0208075	3.59775	0.135141	0.635466	rep1	Yes
26	Cluster19112	Peptide	VAINGFGR	569.829	1137.64	1137.64	2.99	2	2.31	0	0.95	iTRAQ8plex[+304.20536] (N-term); Deamidated[+0.984016] (N4)	2	3	785138	3.17093e+07	0.0494367	0.552327	0.292851	0.065041	rep1	Yes
26	Cluster19112	Peptide	VIITAPAK	710.967	1419.91	1115.72	10	2	3.48	3.9	0.95	iTRAQ8plex[+304.20536] (K8)	2	9	1.00287e+07	1080893067	1.67338	0.294306	0.590143	1.05211	rep2	Yes
26	Cluster19112	Peptide	VIITAPAK	710.967	1419.92	1115.72	3.59	2	2.31	0	0.95	iTRAQ8plex[+304.20536] (N-term); iTRAQ8plex[+304.20536] (K8)	2	2	1.00287e+07	2.72927e+07	1.67339	0.294307	0.590143	1.05211	rep2	Yes
26	Cluster19112	Peptide	VLDEEFGIVK	879.016	1756.02	1451.82	10	2	4.43	5.44	0.99	iTRAQ8plex[+304.20536] (K10)	2	7	2.71938e+07	659644592	0.993439	0.0635479	0.552993	0.010041	rep2	Yes
26	Cluster19112	Peptide	VLDEEFGIVK	879.017	1756.02	1451.82	2.2	2	2.31	0	0.95	iTRAQ8plex[+304.20536] (N-term); iTRAQ8plex[+304.20536] (K10)	2	3	5.00551e+06	3.83993e+07	108.561	0.06776	0.579185	0.146009	rep2	Yes
26	Cluster19112	Peptide	VLDEEFGIVK	739.923	1477.83	1477.83	1.62	2	2.31	0	0.95	Delta:H(2)C(2)[+26.01565] (N-term); iTRAQ8plex[+304.20536] (K10)	2	2	2.3085e+07	2.72887e+07	0.582249	5.62445	46.0551	35.8196	rep2	Yes
26	Cluster19112	Peptide	VPTPNVSVVDLVINVEK	810.816	2429.43	2125.23	10	3	4.12	2.49	0.95	iTRAQ8plex[+304.20536] (K17)	2	2	5.51498e+07	5.65131e+07	0.0194256	0.0562199	0.572353	0.175766	rep2	Yes
26	Cluster19112	Peptide	VVAWYDNEWGYSQR	693.007	2076	1771.8	10	3	4.72	6.01	1		2	4	3.47754e+07	1.0724e+08	0	0	0	0	rep2	No
26	Cluster19112	Peptide	VVAWYDNEWGYSQR	1039.01	2076	2076.01	1.93	2	2.31	0	0.95	iTRAQ8plex[+304.20536] (N-term)	2	1	4.32079e+06	4.32079e+06	1.11862	0.0804212	0.594297	774.304	rep2	Yes
26	Cluster19112	Peptide	VVAWYDNEWGYSQR	794.408	2380.2	2380.2	1.64	3	2.41	0	0.95	iTRAQ8plex[+304.20536] (N-term); iTRAQ8plex[+304.20536] (Y11)	2	5	1.19198e+07	4.7122e+07	1.167	2.00534	0.174414	2.83084	rep1	Yes
26	Cluster19112	Peptide	VVDLAHLVAAK	872.547	1743.08	1438.88	10	2	5.07	6.96	1	iTRAQ8plex[+304.20536] (K11)	2	47	7.01973e+06	1273058822	111.955	0.173707	0.556165	0.107145	rep2	Yes
26	Cluster19112	Peptide	VVDLAHLVAAK	489.306	1464.89	1464.9	3.69	3	2.41	0	0.95	Delta:H(2)C(2)[+26.01565] (N-term); iTRAQ8plex[+304.20536] (K11)	2	1	4.86763e+06	4.86763e+06	0.985062	0.437889	0.57202	29.9499	rep2	Yes
26	Cluster19112	Peptide	VVDLAHLVAAK	586.693	1757.05	1757.06	2.56	3	2.41	0	0.95	iTRAQ8plex[+304.20536] (N-term); iTRAQ8plex[+304.20536] (K11); Pro->pyro-Glu[+13.979265] (H6)	2	3	5.37651e+06	1.21107e+07	1.07798	0.223938	0.559787	0.423567	rep2	Yes
26	Cluster19112	Peptide	VVDLAHLVAAK	589.362	1765.06	1765.07	2.38	3	2.41	0	0.95	iTRAQ8plex[+304.20536] (N-term); iTRAQ8plex[+304.20536] (K11); Cation:Na[+21.981943] (D3)	2	1	1.14083e+07	1.14083e+07	1.10831	0.236003	49.7823	0.317674	rep2	Yes
26	Cluster19112	Peptide	VVDLAHLVAAK	872.548	1743.08	1743	2.07	2	2.31	0	0.95	iTRAQ8plex[+304.20536] (N-term); iTRAQ8plex[+304.20536] (K11)	2	90	5.35667e+06	564144635	1.08787	0.0697137	35.7573	21.1138	rep2	Yes
26	Cluster19112	Peptide	VVSNRDPLK	818.5	1634.99	1330.79	9.5	2	3.03	2.33	0.95	iTRAQ8plex[+304.20536] (K9)	2	2	1.29748e+07	1.92174e+07	1.19763	2.31765	0.354205	1.87249	rep1	Yes
26	Cluster19112	Peptide	VVSNRDPLK	818.5	1634.99	1634.99	2.32	2	2.31	0	0.95	iTRAQ8plex[+304.20536] (N-term); iTRAQ8plex[+304.20536] (K9)	2	3	1.29748e+07	4.76453e+07	1.19763	2.31764	0.354205	1.87249	rep1	Yes
26	Cluster19112	Peptide	VVSNRDPLK	818.991	1635.97	1635.97	2.08	2	2.31	0	0.95	iTRAQ8plex[+304.20536] (N-term); iTRAQ8plex[+304.20536] (K9); Deamidated[+0.984016] (N4)	2	2	3.60159e+06	3.00014e+07	1.4083	0.095759	0.277547	241.661	rep2	Yes
26	Cluster19112	Peptide	WPGEVAAGSGDPLEDFCK	1266.62	2531.22	2531.23	0.79	2	2.31	0	0.95	iTRAQ8plex[+304.20536] (N-term); iTRAQ8plex[+304.20536] (K18); Methylthio (C17)	2	3	7.22424e+06	1.55415e+07	1.49825	5.77696	0.352928	14.5234	rep1	Yes
26	Cluster19112	Peptide	YDSMLGTFK	835.453	1668.89	1364.7	10	2	4.12	5.28	0.99	iTRAQ8plex[+304.20536] (K9)	2	4	1.842e+07	3.2236e+08	1.09563	0.097936	0.561738	0.0962463	rep2	Yes
26	Cluster19112	Peptide	YDSMLGTFK	658.706	1973.09	1973.1	2.58	3	2.41	0	0.95	iTRAQ8plex[+304.20536] (N-term); iTRAQ8plex[+304.20536] (K9); iTRAQ8plex[+304.20536] (Y1)	2	1	1.72864e+07	1.72864e+07	1.01124	0.155526	0.540112	0.105945	rep2	Yes
26	Cluster19112	Peptide	YDSMLGTFK	835.453	1668.89	1668.89	2.28	2	2.31	0	0.95	iTRAQ8plex[+304.20536] (N-term); iTRAQ8plex[+304.20536] (K9)	2	1	1.842e+07	1.842e+07	1.09563	0.097936	0.561739	0.0962466	rep2	Yes
27	Cluster38139	Peptide	AATSFSVA	529.293	1056.57	752.37	10	2	2.31	1.96	0.95		2	2	1.60796e+07	3.91997e+07	0	0	0	0	rep2	No
27	Cluster38139	Peptide	EVEYPGQVLR	747.416	1492.82	1188.61	10	2	3.54	4.24	0.95		2	81	8.50111e+07	7.48691e+09	0	0	0	0	rep1	No
27	Cluster38139	Peptide	NTDFTPYSGDGFQVQVPAK	893.799	2678.37	2374.17	9.5	3	4.75	7.09	1	iTRAQ8plex[+304.20536] (K19)	2	4	7.38412e+07	3.06908e+08	0.943949	0.0799801	7.64821	0.639811	rep2	Yes
27	Cluster38139	Peptide	NTDFTPYSGDGFQVQVPAK	1354.19	2706.37	2678.26	0.75	2	2.31	0	0.95	iTRAQ8plex[+304.20536] (N-term); iTRAQ8plex[+304.20536] (K19)	2	4	6.08072e+06	3.23121e+07	0.0106308	8.80662	0.56697	0.203189	rep2	Yes
28	Cluster22196	Peptide	AENVNAAQTTLLAR	888.498	1774.98	1470.78	10	2	5.25	5.52	1		2	7	2.58729e+08	5.48244e+08	0	0	0	0	rep1	No
28	Cluster22196	Peptide	AENVNAAQTTLLAR	895.509	1789	1789.01	2.57	2	2.31	0	0.95	iTRAQ8plex[+304.20536] (N-term); Pro->pyro-Glu[+13.979265] (E2)	2	1	2.70387e+06	2.70387e+06	41.135	0.224514	0.695122	431.857	rep2	Yes
28	Cluster22196	Peptide	AENVNAAQTTLLAR	694.068	2079.18	2079.19	2.45	3	2.41	0	0.95	iTRAQ8plex[+304.20536] (N-term); iTRAQ8plex[+304.20536] (T10)	2	1	1.22628e+07	1.22628e+07	0.79386	0.111035	57.4487	1.25824	rep2	Yes
28	Cluster22196	Peptide	AENVNAAQTTLLAR	888.498	1774.98	1456.76	2.2	2	2.31	0	0.95	iTRAQ8plex[+304.20536] (N-term)	2	8	2.01799e+07	1.45166e+08	1.10616	0.0789311	0.539949	0.0112952	rep2	Yes
28	Cluster22196	Peptide	AENVNAAQTTLLAR	736.89	1471.76	1471.77	1.49	2	2.31	0	0.95	iTRAQ8plex[+304.20536] (N-term); Deamidated[+0.984016] (N5)	2	2	1.17251e+07	2.32847e+07	0.92973	0.234005	22.6775	0.658973	rep2	Yes
28	Cluster22196	Peptide	AENVNAAQTTLLAR	888.992	1775.97	1775.97	1.35	2	2.31	0	0.95	iTRAQ8plex[+304.20536] (N-term); Deamidated[+0.984016] (N3)	2	3	1.20268e+07	4.72359e+07	1.22171	0.0633563	44.8632	1.52492	rep2	Yes
28	Cluster22196	Peptide	ALQNTCLK	741.954	1481.89	1239.66	3.23	2	2.31	0	0.95	iTRAQ8plex[+304.20536] (N-term); iTRAQ8plex[+304.20536] (K8); Methylthio (C6)	2	4	1.44686e+07	5.95297e+07	1.34778	0.0761359	46.6629	1.68648	rep2	Yes
28	Cluster22196	Peptide	ALQNTCLK	773.431	1544.85	1544.85	2.46	2	2.31	0	0.95	iTRAQ8plex[+304.20536] (N-term); iTRAQ8plex[+304.20536] (K8); Deamidated[+0.984016] (N4); Methylthio (C6)	2	2	1.96185e+07	3.43546e+07	1.22085	0.170621	0.669279	5.2594	rep2	Yes
28	Cluster22196	Peptide	ANSLAQLGK	755.461	1508.91	1204.71	10	2	4.3	5.61	1	iTRAQ8plex[+304.20536] (K9)	2	6	7.1436e+07	1536593359	0.970908	0.0659078	0.57573	0.0111453	rep2	Yes
28	Cluster22196	Peptide	ANSLAQLGK	605.379	1813.11	1813.12	3.47	3	2.41	0	0.95	iTRAQ8plex[+304.20536] (N-term); iTRAQ8plex[+304.20536] (K9); iTRAQ8plex[+304.20536] (S3)	2	1	1.30092e+07	1.30092e+07	1.12917	11.5903	0.578123	4.50694	rep2	Yes
28	Cluster22196	Peptide	ANSLAQLGK	755.46	1508.9	1231.71	3.25	2	2.31	0	0.95	iTRAQ8plex[+304.20536] (N-term); iTRAQ8plex[+304.20536] (K9)	2	5	1.31425e+07	7.15573e+07	100.067	0.200489	0.617578	2.36732	rep2	Yes
28	Cluster22196	Peptide	ANSLAQLGK	603.851	1205.69	1205.69	1.99	2	2.31	0	0.95	iTRAQ8plex[+304.20536] (N-term); iTRAQ8plex[+304.20536] (K9); Deamidated[+0.984016] (N2)	2	1	1.65999e+07	1.65999e+07	70.489	6.83983	51.6139	4.36211	rep2	Yes
28	Cluster22196	Peptide	ATPEQVASYTLK	958.549	1915.08	1610.88	9.5	2	5.29	6	1	iTRAQ8plex[+304.20536] (K12)	2	9	1.55308e+08	8.24157e+08	7.36118	6.35419	0.329992	2.32152	rep1	Yes
28	Cluster22196	Peptide	ATPEQVASYTLK	958.552	1915.09	1610.89	3.1	2	2.31	0	0.95	iTRAQ8plex[+304.20536] (N-term); iTRAQ8plex[+304.20536] (K12)	2	11	2.95186e+06	8.39561e+07	0.00925544	0.13677	0.699455	5.22137	rep2	Yes
28	Cluster22196	Peptide	ATPEQVASYTLK	819.455	1636.89	1636.9	1.83	2	2.31	0	0.95	Delta:H(2)C(2)[+26.01565] (N-term); iTRAQ8plex[+304.20536] (K12)	2	1	1.21143e+07	1.21143e+07	1.02151	0.0799835	0.634295	581.311	rep2	Yes
28	Cluster22196	Peptide	EAAWGLAR	589.335	1176.65	872.451	10	2	3.19	3.47	0.95		2	4	6.82945e+08	9.19765e+08	0	0	0	0	rep1	No
28	Cluster22196	Peptide	EGMFVKGYTY	923.004	1843.99	1844	2.49	2	2.31	0	0.95	iTRAQ8plex[+304.20536] (N-term); iTRAQ8plex[+304.20536] (K6)	2	2	2.39213e+06	6.54154e+06	0.987453	0.129732	0.621704	4.08498	rep2	Yes
28	Cluster22196	Peptide	GILAMDESNATCGK	693.378	2077.11	2077.11	1.73	3	2.41	0	0.95	iTRAQ8plex[+304.20536] (N-term); iTRAQ8plex[+304.20536] (K14); Deamidated[+0.984016] (N9); Methylthio (C12)	2	1	3.03124e+07	3.03124e+07	0.520584	5.32465	53.1084	10.62	rep2	Yes
28	Cluster22196	Peptide	GILAMDESNATCGK	1032.52	2063.02	2058.99	0.97	2	2.31	0	0.95	iTRAQ8plex[+304.20536] (N-term); iTRAQ8plex[+304.20536] (K14); Methylthio (C12)	2	3	1.16927e+07	2.95004e+07	0.841352	0.125152	66.0601	0.0222991	rep2	Yes
28	Cluster22196	Peptide	GLVPLVGSNNESWCQGLDGLSSR	761.393	3041.54	3041.55	2.1	4	2.61	0	0.95	iTRAQ8plex[+304.20536] (N-term); iTRAQ8plex[+304.20536] (S12); Methylthio (C14)	2	1	5.43593e+06	5.43593e+06	1.13662	0.120001	0.641178	0.284161	rep2	Yes
28	Cluster22196	Peptide	GLVPLVGSNNESWCQGLDGLSSR	1014.86	3041.55	3041.55	1.97	3	2.41	0	0.95	iTRAQ8plex[+304.20536] (N-term); iTRAQ8plex[+304.20536] (S8); Methylthio (C14)	2	1	4.32045e+06	4.32045e+06	1.29234	0.0600475	0.663783	486.342	rep2	Yes
28	Cluster22196	Peptide	GLVPLVGSNNESWCQGLDGLSSR	1370.17	2738.33	2738.33	0.73	2	2.31	0	0.95	iTRAQ8plex[+304.20536] (N-term); Deamidated[+0.984016] (N9); Methylthio (C14)	2	3	5.18732e+06	1.42336e+07	60.8085	4.80122	73.7639	4.53382	rep2	Yes
28	Cluster22196	Peptide	GLVPLVGSNNESWCQGLDGLSSR	1369.68	2737.34	2737.35	0.73	2	2.31	0	0.95	iTRAQ8plex[+304.20536] (N-term); Methylthio (C14)	2	3	6.38018e+06	1.5671e+07	4.76909	1.25219	21.9335	1.07794	rep1	Yes
28	Cluster22196	Peptide	LDSIGLENTEANR	579.309	1734.9	1430.7	10	3	4.56	6	1		2	6	1.47645e+08	4.43445e+08	0	0	0	0	rep1	No
28	Cluster22196	Peptide	LDSIGLENTEANR	510.783	2039.1	2039.11	2.75	4	2.61	0	0.95	iTRAQ8plex[+304.20536] (N-term); iTRAQ8plex[+304.20536] (S3)	2	1	2.59094e+07	2.59094e+07	1.12377	5.76005	0.219028	8.15295	rep2	Yes
28	Cluster22196	Peptide	LDSIGLENTEANR	868.457	1734.9	1430.7	2.1	2	2.31	0	0.95	iTRAQ8plex[+304.20536] (N-term)	2	6	1.57939e+07	1.18639e+08	0.0102716	0.159662	0.58462	4.98079	rep2	Yes
28	Cluster22196	Peptide	LDSIGLENTEANR	579.636	1735.89	1735.89	2.07	3	2.41	0	0.95	iTRAQ8plex[+304.20536] (N-term); Deamidated[+0.984016] (N8)	2	2	2.72493e+07	6.02823e+07	0.0320289	0.0592427	0.65986	21.6935	rep2	Yes
28	Cluster22196	Peptide	MVDVLVEQNIVPGIK	754.782	2261.32	1957.12	9.5	3	5.31	8.54	1	iTRAQ8plex[+304.20536] (K15)	2	12	3.9658e+08	7.98236e+08	0.104321	29.1585	0.630318	2.48792	rep1	Yes
28	Cluster22196	Peptide	MVDVLVEQNIVPGIK	1131.67	2261.32	2261.32	2.65	2	2.31	0	0.95	iTRAQ8plex[+304.20536] (N-term); iTRAQ8plex[+304.20536] (K15)	2	8	1.24201e+07	6.90232e+07	1.08967	0.0382096	0.69681	0.0216066	rep2	Yes
28	Cluster22196	Peptide	MVDVLVEQNIVPGIK	762.108	2283.3	2283.31	1.84	3	2.41	0	0.95	iTRAQ8plex[+304.20536] (N-term); iTRAQ8plex[+304.20536] (K15); Cation:Na[+21.981943] (E7)	2	2	2.31095e+07	3.94209e+07	0.00709556	0.0425281	0.624153	0.0135585	rep2	Yes
28	Cluster22196	Peptide	RLDSIGLENTEANR	631.342	1891	1586.8	10	3	6.42	7.41	1		2	24	3.93799e+08	8.45832e+08	0	0	0	0	rep1	No
28	Cluster22196	Peptide	RLDSIGLENTEANR	807.412	1612.81	1612.81	2.6	2	2.31	0	0.95	Delta:H(2)C(2)[+26.01565] (N-term)	2	1	6.4132e+06	6.4132e+06	0	0	0	0	rep2	No
28	Cluster22196	Peptide	RLDSIGLENTEANR	549.809	2195.2	2195.21	3.83	4	2.61	0	0.95	iTRAQ8plex[+304.20536] (N-term); iTRAQ8plex[+304.20536] (S4)	2	1	3.44112e+07	3.44112e+07	1.55856	2.47104	0.374616	3.02665	rep1	Yes
28	Cluster22196	Peptide	RLDSIGLENTEANR	794.409	1586.8	1586.81	2.52	2	2.31	0	0.95	iTRAQ8plex[+304.20536] (N-term)	2	56	9.32264e+06	5.19628e+08	0.0892561	26.9993	45.7677	68.8962	rep2	Yes
28	Cluster22196	Peptide	RLDSIGLENTEANR	947.005	1891.99	1892	2.33	2	2.31	0	0.95	iTRAQ8plex[+304.20536] (N-term); Deamidated[+0.984016] (N9)	2	3	4.55915e+06	4.29972e+07	0.0438846	0.154815	0.019829	4.01363	rep2	Yes
28	Cluster22196	Peptide	RLDSIGLENTEANR	631.669	1891.98	1891.99	1.59	3	2.41	0	0.95	iTRAQ8plex[+304.20536] (N-term); Deamidated[+0.984016] (N13)	2	2	3.11197e+07	5.46517e+07	1.80208	4.7872	0.126289	1.83697	rep1	Yes
28	Cluster22196	Peptide	TAAYYQQGAR	577.782	1153.55	1153.55	1.91	2	2.31	0	0.95	Delta:H(2)C(2)[+26.01565] (N-term)	2	3	2.21626e+07	5.98381e+07	0	0	0	0	rep2	No
28	Cluster22196	Peptide	TAAYYQQGAR	716.877	1431.74	1127.54	10	2	3.89	4.19	0.95		2	8	2.12699e+07	4.751e+08	0	0	0	0	rep1	No
28	Cluster22196	Peptide	TAAYYQQGAR	868.976	1735.94	1735.94	3.92	2	2.31	0	0.95	iTRAQ8plex[+304.20536] (N-term); iTRAQ8plex[+304.20536] (Y4)	2	2	3.48692e+06	9.1093e+06	0.0106031	0.360391	0.537106	3.60446	rep2	Yes
28	Cluster22196	Peptide	TAAYYQQGAR	716.876	1431.74	1431.74	3.77	2	2.31	0	0.95	iTRAQ8plex[+304.20536] (N-term)	2	7	1.73147e+07	8.62658e+07	1.13491	0.238183	0.589468	371.358	rep2	Yes
28	Cluster22196	Peptide	TAAYYQQGAR	579.653	1735.94	1735.94	3.11	3	2.41	0	0.95	iTRAQ8plex[+304.20536] (N-term); iTRAQ8plex[+304.20536] (Y5)	2	1	1.50481e+07	1.50481e+07	1.06096	4.84537	35.8168	0.833336	rep2	Yes
28	Cluster22196	Peptide	TAAYYQQGAR	723.88	1445.74	1445.75	2.77	2	2.31	0	0.95	iTRAQ8plex[+304.20536] (N-term); Pro->pyro-Glu[+13.979265] (T1)	2	1	5.64028e+06	5.64028e+06	38.11	0.517597	37.3519	47.6028	rep2	Yes
28	Cluster22196	Peptide	TAAYYQQGAR	717.37	1432.72	1432.73	1.81	2	2.31	0	0.95	iTRAQ8plex[+304.20536] (N-term); Deamidated[+0.984016] (Q7)	2	1	1.09405e+07	1.09405e+07	0.891128	35.2759	0.687082	161.215	rep2	Yes
28	Cluster22196	Peptide	TIASPGR	503.301	1004.59	1004.59	2.99	2	2.31	0	0.95	iTRAQ8plex[+304.20536] (N-term)	2	6	1.60781e+06	42101879	1.07699	0.117379	0.595547	5.42947	rep2	Yes
28	Cluster22196	Peptide	TVVSIPNGPSALAVK	1031.13	2060.24	1756.04	10	2	4.43	5.55	1	iTRAQ8plex[+304.20536] (K15)	2	4	9.86897e+06	272145433	0.00669775	0.0645428	0.414734	2.65477	rep2	Yes
28	Cluster22196	Peptide	TVVSIPNGPSALAVK	592.117	2364.44	2364.44	2.37	4	2.61	0	0.95	iTRAQ8plex[+304.20536] (N-term); iTRAQ8plex[+304.20536] (K15); iTRAQ8plex[+304.20536] (S10)	2	1	2.25789e+07	2.25789e+07	0.626393	0.0778422	46.873	0.301891	rep2	Yes
28	Cluster22196	Peptide	TVVSIPNGPSALAVK	789.48	2365.42	2365.42	2.28	3	2.41	0	0.95	iTRAQ8plex[+304.20536] (N-term); iTRAQ8plex[+304.20536] (K15); iTRAQ8plex[+304.20536] (S10); Deamidated[+0.984016] (N7)	2	1	1.23597e+07	1.23597e+07	0.770082	0.0892262	0.580825	2.59976	rep2	Yes
28	Cluster22196	Peptide	TVVSIPNGPSALAVK	1031.13	2060.24	2060.22	1.94	2	2.31	0	0.95	iTRAQ8plex[+304.20536] (N-term); iTRAQ8plex[+304.20536] (K15)	2	2	9.86897e+06	2.66984e+07	0.0066977	0.064543	0.414734	2.65477	rep2	Yes
28	Cluster22196	Peptide	TYEVAEK	724.414	1446.81	1142.61	9.5	2	3.28	3.55	0.95	iTRAQ8plex[+304.20536] (K7)	2	5	6.63368e+07	2.9609e+08	0.956128	7.52974	0.417071	2.49948	rep1	Yes
28	Cluster22196	Peptide	TYEVAEK	724.415	1446.81	1142.61	3.85	2	2.31	0	0.95	iTRAQ8plex[+304.20536] (N-term); iTRAQ8plex[+304.20536] (K7)	2	2	3.6416e+06	2.06706e+07	0.355247	11.072	0.670278	195.176	rep2	Yes
28	Cluster22196	Peptide	TYEVAEK	876.511	1751.01	1751.01	2.86	2	2.31	0	0.95	iTRAQ8plex[+304.20536] (N-term); iTRAQ8plex[+304.20536] (K7); iTRAQ8plex[+304.20536] (Y2)	2	1	1.56458e+06	1.56458e+06	0.89142	0.307378	0.567607	4.4424	rep2	Yes
28	Cluster22196	Peptide	TYEVAEK	876.518	1751.02	1751.03	2.51	2	2.31	0	0.95	iTRAQ8plex[+304.20536] (N-term); iTRAQ8plex[+304.20536] (K7); iTRAQ8plex[+304.20536] (T1)	2	1	3.20033e+06	3.20033e+06	0.0136781	2.30268	102.718	300.921	rep1	Yes
28	Cluster22196	Peptide	YAAISQDSGLVPIVEPEILLDGEHDIDR	1123.59	3367.74	3063.54	10	3	6.72	7.17	1		2	26	5.50197e+07	4.2434e+08	0	0	0	0	rep2	No
28	Cluster22196	Peptide	YAAISQDSGLVPIVEPEILLDGEHDIDR	918.993	3671.94	3671.94	2.4	4	2.61	0	0.95	iTRAQ8plex[+304.20536] (N-term); iTRAQ8plex[+304.20536] (S8)	2	3	7.476e+06	2.02905e+07	0.030684	6.6358	0.612733	0.121144	rep2	Yes
28	Cluster22196	Peptide	YAAISQDSGLVPIVEPEILLDGEHDIDR	1123.59	3367.74	3063.54	1.96	3	2.41	0	0.95	iTRAQ8plex[+304.20536] (N-term)	2	44	3.74874e+06	3.20522e+08	1.30198	0.327038	0.285235	2.67848	rep1	Yes
28	Cluster22196	Peptide	YAAISQDSGLVPIVEPEILLDGEHDIDR	682.143	3405.68	3405.68	1.76	5	2.61	0	0.95	iTRAQ8plex[+304.20536] (N-term); Cation:K[+37.955882] (E17)	2	1	1.35232e+07	1.35232e+07	0.0399473	0.0872872	0.677121	0.637655	rep2	Yes
28	Cluster22196	Peptide	YAAISQDSGLVPIVEPEILLDGEHDIDR	918.745	3670.95	3671.95	1.63	4	2.61	0	0.95	iTRAQ8plex[+304.20536] (N-term); iTRAQ8plex[+304.20536] (Y1)	2	39	2.56971e+06	1.26882e+08	0.0667415	5.39049	0.35665	2.00977	rep1	Yes
28	Cluster22196	Peptide	YTGEGESEEAK	904.457	1806.9	1502.7	10	2	5.4	6.66	1	iTRAQ8plex[+304.20536] (K11)	2	7	1.01858e+08	4.28044e+08	0.849159	0.0430806	0.596544	0.011785	rep2	Yes
28	Cluster22196	Peptide	YTGEGESEEAK	603.309	1806.9	1502.7	3.59	3	2.41	0	0.95	iTRAQ8plex[+304.20536] (N-term); iTRAQ8plex[+304.20536] (K11)	2	6	4.50795e+06	6.89772e+07	0.672884	10.6292	0.362774	0.466495	rep2	Yes
29	Cluster25442	Peptide	ADDCIGPEVESLVGSLPEGGVLLLENVR	1077.56	3229.65	3229.65	0.93	3	2.41	0	0.95	iTRAQ8plex[+304.20536] (N-term); Methylthio (C4)	2	1	7.19482e+06	7.19482e+06	0.0315006	7.61702	0.620676	25.6021	rep2	Yes
29	Cluster25442	Peptide	ADLNVPLDDNQTITDDTR	1021.49	2040.96	2040.96	0.98	2	2.31	0	0.95	Delta:H(2)C(2)[+26.01565] (N-term)	2	6	2.19626e+06	7.84009e+06	0	0	0	0	rep1	No
29	Cluster25442	Peptide	ADLNVPLDDNQTITDDTR	1160.58	2319.15	2014.94	10	2	5.21	5.92	1		2	18	3.4939e+07	4.11771e+08	0	0	0	0	rep1	No
29	Cluster25442	Peptide	FSLAPLVPR	513.311	1024.61	1024.61	2.15	2	2.31	0	0.95	Delta:H(2)C(2)[+26.01565] (N-term)	2	2	8.35204e+06	1.42877e+07	0	0	0	0	rep2	No
29	Cluster25442	Peptide	FSLAPLVPR	652.404	1302.79	998.591	10	2	3.1	3.06	0.95		2	22	1.09676e+09	1.81504e+09	0	0	0	0	rep1	No
29	Cluster25442	Peptide	KADDCIGPEVESLVGSLPEGGVLLLENVR	916.492	3661.94	3661.95	2.51	4	2.61	0	0.95	iTRAQ8plex[+304.20536] (N-term); iTRAQ8plex[+304.20536] (K1); Methylthio (C5)	2	1	1.02916e+06	1.02916e+06	1.20498	6.23363	0.684319	4.54187	rep2	Yes
29	Cluster25442	Peptide	LASLADLYVNDAFGTAHR	654.004	1958.99	1958.99	2.76	3	2.42	0	0.95	Delta:H(2)C(2)[+26.01565] (N-term)	2	2	8.70789e+06	2.38349e+07	0	0	0	0	rep2	No
29	Cluster25442	Peptide	LASLADLYVNDAFGTAHR	746.731	2237.17	1932.97	10	3	4.74	5.87	1		2	7	8.17328e+06	3.73977e+07	0	0	0	0	rep2	No
29	Cluster25442	Peptide	YLIDNGAK	599.34	1196.66	1196.67	5.48	2	2.44	2.34	0.95	iTRAQ8plex[+304.20536] (K8)	2	1	1.11905e+07	1.11905e+07	0.501575	3.92084	0.358635	0.608712	rep2	Yes
30	Cluster23128	Peptide	AVALVLPNLK	823.542	1645.07	1340.87	9.5	2	4.07	6.29	1	iTRAQ8plex[+304.20536] (K10)	2	11	1.163e+08	1079495715	3.3511	8.38606	0.160642	0.43198	rep1	Yes
30	Cluster23128	Peptide	CSDVSSTIDSSLTMVMGDDMVK	992.472	2974.39	2974.39	1.41	3	2.41	0	0.95	iTRAQ8plex[+304.20536] (N-term); iTRAQ8plex[+304.20536] (K22); Methylthio (C1)	2	2	8.58804e+06	2.99109e+07	0.0111974	6.07686	0.373052	0.116511	rep1	Yes
30	Cluster23128	Peptide	DSPLDVIAINDTGGVK	1111.63	2221.24	1917.04	10	2	5.91	6.69	1	iTRAQ8plex[+304.20536] (K16)	2	6	9.88741e+06	302609806	0.869463	0.121456	0.523849	0.0317946	rep2	Yes
30	Cluster23128	Peptide	DSPLDVIAINDTGGVK	1111.63	2221.24	2221.23	1.8	2	2.31	0	0.95	iTRAQ8plex[+304.20536] (N-term); iTRAQ8plex[+304.20536] (K16)	2	3	9.88741e+06	2.97692e+07	0.869462	0.121456	0.52385	0.0317945	rep2	Yes
30	Cluster23128	Peptide	DSPLDVIAINDTGGVK	1112.12	2222.22	2222.23	0.9	2	2.31	0	0.95	iTRAQ8plex[+304.20536] (N-term); iTRAQ8plex[+304.20536] (K16); Deamidated[+0.984016] (N10)	2	1	7.45922e+06	7.45922e+06	0.0114968	0.0692437	0.572786	0.048267	rep2	Yes
30	Cluster23128	Peptide	DSPLDVIAINDTGGVK	972.533	1943.05	1943.05	0.41	2	2.31	0	0.95	Delta:H(2)C(2)[+26.01565] (N-term); iTRAQ8plex[+304.20536] (K16)	2	6	2.42575e+06	2.43477e+07	1.17515	0.644832	0.303301	12.6502	rep1	Yes
30	Cluster23128	Peptide	GILDVCDEPLVSVDFR	1064.04	2126.07	2126.07	0.94	2	2.31	0	0.95	iTRAQ8plex[+304.20536] (N-term); Methylthio (C6)	2	6	1.27295e+07	6.68645e+07	7.66195	1.40212	0.181923	2.24865	rep1	Yes
30	Cluster23128	Peptide	GTMTTTHSYTGDQR	625.964	1874.87	1570.67	10	3	4.4	6.97	1	Oxidation[+15.994915] (M3)	2	15	3.47603e+07	4.54864e+08	0	0	0	0	rep2	No
30	Cluster23128	Peptide	GTMTTTHSYTGDQR	830.355	1658.69	1658.7	1.45	2	2.31	0	0.95	Acetyl[+42.010565] (N-term)	2	1	4.623e+06	4.623e+06	0	0	0	0	rep2	No
30	Cluster23128	Peptide	GTMTTTHSYTGDQR	930.447	1858.88	1554.67	10	2	5.79	7.09	1		2	12	2.06474e+06	1.93223e+08	0	0	0	0	rep1	No
30	Cluster23128	Peptide	HIQAGAK	444.943	1331.8	1027.61	10	3	3.13	4.18	1	iTRAQ8plex[+304.20536] (K7)	2	3	3.55865e+08	4.20414e+08	1.08329	0.14052	0.660781	0.00673503	rep2	Yes
30	Cluster23128	Peptide	HIQAGAK	666.913	1331.81	1331.82	3.45	2	2.31	0	0.95	iTRAQ8plex[+304.20536] (N-term); iTRAQ8plex[+304.20536] (K7)	2	1	1.70829e+07	1.70829e+07	0.0139897	20.9432	27.0341	113.787	rep1	Yes
30	Cluster23128	Peptide	KDSPLDVIAINDTGGVK	1327.77	2653.53	2653.53	1.51	2	2.31	0	0.95	iTRAQ8plex[+304.20536] (N-term); iTRAQ8plex[+304.20536] (K1); iTRAQ8plex[+304.20536] (K17)	2	1	840065	840065	0.854973	6.27077	0.530643	4.78751	rep2	Yes
30	Cluster23128	Peptide	LLDASHR	372.553	1114.64	810.435	10	3	2.84	3.17	0.95		2	2	7.10209e+08	1.00049e+09	0	0	0	0	rep1	No
30	Cluster23128	Peptide	LNGIALR	530.842	1059.67	755.465	10	2	2.49	2	0.95		2	1	8.63849e+07	8.63849e+07	0	0	0	0	rep1	No
30	Cluster23128	Peptide	QATHLLK	709.947	1417.88	1113.68	9.5	2	3.3	4.03	0.95	iTRAQ8plex[+304.20536] (K7)	2	1	1.58501e+07	1.58501e+07	1.1144	0.287626	0.29967	0.424981	rep1	Yes
30	Cluster23128	Peptide	QATHLLK	709.946	1417.88	1417.88	3.67	2	2.31	0	0.95	iTRAQ8plex[+304.20536] (N-term); iTRAQ8plex[+304.20536] (K7)	2	2	9985355	2.58355e+07	0.81903	0.433848	0.581762	214.835	rep2	Yes
30	Cluster23128	Peptide	TFAEEVNAAFR	779.91	1557.8	1253.6	10	2	4.22	4.41	0.96		2	9	2.64328e+07	4.95434e+08	0	0	0	0	rep2	No
30	Cluster23128	Peptide	VIAWYDNEWGYSQR	1046.01	2090.02	1785.81	10	2	4.34	3.75	0.95		2	2	3.44505e+06	6.3009e+06	0	0	0	0	rep2	No
30	Cluster23128	Peptide	VLITAPGK	703.96	1405.91	1101.71	9.5	2	3.28	2.48	0.95	iTRAQ8plex[+304.20536] (K8)	2	3	5.24171e+08	7.4498e+08	0.220233	2.59753	0.338109	2.64779	rep1	Yes
30	Cluster23128	Peptide	VPTPNVSVVDLVVQVSK	796.813	2387.42	2083.22	10	3	4.66	6.7	1	iTRAQ8plex[+304.20536] (K17)	2	5	2.27504e+07	1.91498e+08	0.0220358	0.106714	14.0673	0.260793	rep2	Yes
30	Cluster23128	Peptide	VPTPNVSVVDLVVQVSK	796.814	2387.42	2387.42	1.76	3	2.41	0	0.95	iTRAQ8plex[+304.20536] (N-term); iTRAQ8plex[+304.20536] (K17)	2	1	1.51391e+07	1.51391e+07	0.0215054	0.16256	17.7502	0.253952	rep2	Yes
30	Cluster23128	Peptide	YDSTLGIFDADVKPSGDSALSVDGK	867.964	3467.82	3469.85	2.65	4	2.61	0	0.95	iTRAQ8plex[+304.20536] (N-term); iTRAQ8plex[+304.20536] (K13); iTRAQ8plex[+304.20536] (K25)	2	2	2.46856e+07	3.58758e+07	0.0703465	0.0448464	0.564584	0.342893	rep2	Yes
30	Cluster23128	Peptide	YDSTLGIFDADVKPSGDSALSVDGK	755.614	3773.03	3773.04	2.25	5	2.61	0	0.95	iTRAQ8plex[+304.20536] (N-term); iTRAQ8plex[+304.20536] (K13); iTRAQ8plex[+304.20536] (K25); iTRAQ8plex[+304.20536] (S18)	2	1	1.64749e+07	1.64749e+07	0.5228	0.150328	0.59233	22.2736	rep2	Yes
30	Cluster23128	Peptide	YDSTLGIFDADVKPSGDSALSVDGK	944.016	3772.03	3772.02	1.91	4	2.61	0	0.95	iTRAQ8plex[+304.20536] (N-term); iTRAQ8plex[+304.20536] (K13); iTRAQ8plex[+304.20536] (K25); iTRAQ8plex[+304.20536] (S15)	2	3	1.41142e+07	6.17889e+07	0.00852292	0.068967	0.604383	0.0928103	rep2	Yes
31	Cluster42736	Peptide	AWPYVQNDLR	783.419	1564.82	1260.63	10	2	3.62	3.93	0.95		2	34	1.07531e+08	1.60344e+09	0	0	0	0	rep2	No
31	Cluster42736	Peptide	AWPYVQNDLR	935.524	1869.03	1869.04	1.82	2	2.31	0	0.95	iTRAQ8plex[+304.20536] (N-term); iTRAQ8plex[+304.20536] (Y4)	2	6	4.0737e+06	3.64325e+07	1.5129	0.0310447	65.2036	2.31464	rep1	Yes
31	Cluster42736	Peptide	AWPYVQNDLR	783.42	1564.83	1564.81	1.66	2	2.31	0	0.95	iTRAQ8plex[+304.20536] (N-term)	2	42	1.46682e+07	274712821	1.28649	5.84918	0.208185	1.22416	rep1	Yes
31	Cluster42736	Peptide	DFSLKLK	500.982	1499.92	1195.71	9.5	3	3.19	3.05	0.95	Acetyl[+42.010565] (K5); iTRAQ8plex[+304.20536] (K7)	2	1	3.71775e+07	3.71775e+07	1.27988	0.744249	0.098522	2.71672	rep1	Yes
31	Cluster42736	Peptide	EIINVK	662.424	1322.83	1018.63	9.5	2	2.64	2.17	0.95	iTRAQ8plex[+304.20536] (K6)	2	1	4.18753e+07	4.18753e+07	1.26903	4.60681	0.151998	2.27055	rep1	Yes
31	Cluster42736	Peptide	EIINVK	662.424	1322.83	1322.84	2.42	2	2.31	0	0.95	iTRAQ8plex[+304.20536] (N-term); iTRAQ8plex[+304.20536] (K6)	2	2	1.56765e+07	2.93786e+07	0.796981	0.416671	0.649653	1.38069	rep2	Yes
31	Cluster42736	Peptide	ESAKEIINVK	594.361	1780.06	1475.85	9.5	3	4.22	3.61	0.95	Acetyl[+42.010565] (K4); iTRAQ8plex[+304.20536] (K10)	2	2	6.58157e+07	1.08547e+08	0.946598	0.649494	0.195021	2.56746	rep1	Yes
31	Cluster42736	Peptide	FYIQPLSPTEAAAR	795.418	1588.82	1588.82	1.51	2	2.31	0	0.95	Delta:H(2)C(2)[+26.01565] (N-term)	2	9	4.88e+06	4.2759e+07	0	0	0	0	rep2	No
31	Cluster42736	Peptide	FYIQPLSPTEAAAR	820.408	1638.8	1638.8	0.61	2	2.31	0	0.95	Acetyl[+42.010565] (N-term)	2	3	2.98046e+06	8.13446e+06	0	0	0	0	rep1	No
31	Cluster42736	Peptide	FYIQPLSPTEAAAR	934.514	1867.01	1562.81	10	2	4.49	4.74	0.98		2	40	1.51838e+06	3.50768e+09	0	0	0	0	rep1	No
31	Cluster42736	Peptide	FYIQPLSPTEAAAR	934.513	1867.01	1867.01	2.04	2	2.31	0	0.95	iTRAQ8plex[+304.20536] (N-term)	2	60	7.93667e+06	576271775	1.29576	0.0424389	27.4278	0.0643679	rep1	Yes
31	Cluster42736	Peptide	FYIQPLSPTEAAAR	1086.62	2171.22	2171.23	1.84	2	2.31	0	0.95	iTRAQ8plex[+304.20536] (N-term); iTRAQ8plex[+304.20536] (S7)	2	2	1.17457e+06	2.14845e+06	1.11014	7.10703	0.630659	4.44323	rep2	Yes
31	Cluster42736	Peptide	FYIQPLSPTEAAAR	1086.62	2171.21	2171.2	1.84	2	2.31	0	0.95	iTRAQ8plex[+304.20536] (N-term); iTRAQ8plex[+304.20536] (Y2)	2	84	8.61972e+06	704908837	1.93292	0.0297423	0.510452	2.43764	rep1	Yes
31	Cluster42736	Peptide	LFQTIDNLDYAAR	769.877	1537.74	1537.74	0.65	2	2.31	0	0.95	Carbamyl[+43.005814] (N-term)	2	1	2.11874e+06	2.11874e+06	0	0	0	0	rep1	No
31	Cluster42736	Peptide	LFQTIDNLDYAAR	922.495	1842.98	1538.77	10	2	5.03	5.35	0.99		2	77	5.38611e+08	3.22544e+09	0	0	0	0	rep1	No
31	Cluster42736	Peptide	LFQTIDNLDYAAR	717.061	2148.16	2148.16	2.79	3	2.41	0	0.95	iTRAQ8plex[+304.20536] (N-term); iTRAQ8plex[+304.20536] (Y10); Deamidated[+0.984016] (N7)	2	1	2.15264e+07	2.15264e+07	1.09546	0.159201	0.635971	0.015891	rep2	Yes
31	Cluster42736	Peptide	LFQTIDNLDYAAR	537.802	2147.18	2147.18	2.61	4	2.61	0	0.95	iTRAQ8plex[+304.20536] (N-term); iTRAQ8plex[+304.20536] (T4)	2	1	8.15335e+06	8.15335e+06	1.17214	0.336361	0.597918	121.055	rep2	Yes
31	Cluster42736	Peptide	LFQTIDNLDYAAR	922.493	1842.97	1538.78	2.21	2	2.31	0	0.95	iTRAQ8plex[+304.20536] (N-term)	2	170	1.68812e+06	1024411168	1.15387	8.34291	0.640251	0.358033	rep2	Yes
31	Cluster42736	Peptide	LFQTIDNLDYAAR	716.733	2147.17	1842.98	1.95	3	2.41	0	0.95	iTRAQ8plex[+304.20536] (N-term); iTRAQ8plex[+304.20536] (Y10)	2	80	3.72085e+07	779820243	1.92839	1.54085	0.244347	2.43001	rep1	Yes
31	Cluster42736	Peptide	LFQTIDNLDYAAR	929.503	1856.99	1857	1.94	2	2.31	0	0.95	iTRAQ8plex[+304.20536] (N-term); Pro->pyro-Glu[+13.979265] (L1)	2	2	1.0247e+07	2.33327e+07	2.47518	11.0214	35.0603	25.487	rep1	Yes
31	Cluster42736	Peptide	LFQTIDNLDYAAR	622.659	1864.95	1864.96	1.77	3	2.41	0	0.95	iTRAQ8plex[+304.20536] (N-term); Cation:Na[+21.981943] (D6)	2	1	1.12887e+07	1.12887e+07	0.0060881	0.142354	0.626378	0.0306363	rep2	Yes
31	Cluster42736	Peptide	LFQTIDNLDYAAR	922.989	1843.96	1843.96	1.19	2	2.31	0	0.95	iTRAQ8plex[+304.20536] (N-term); Deamidated[+0.984016] (N7)	2	6	2.03379e+07	8.87381e+07	0.0129001	5.28574	189.385	59.1221	rep1	Yes
31	Cluster42736	Peptide	QSLKELTGK	827.505	1652.99	1348.79	9.5	2	3.37	3.71	0.95	Acetyl[+42.010565] (K4); iTRAQ8plex[+304.20536] (K9)	2	1	3.70229e+06	3.70229e+06	0.0246374	4.61104	0.381677	204.11	rep1	Yes
31	Cluster42736	Peptide	SKSSPDAEK	533.631	1597.87	1597.87	2.07	3	2.41	0	0.95	Acetyl[+42.010565] (N-term); iTRAQ8plex[+304.20536] (K2); iTRAQ8plex[+304.20536] (K9)	2	1	1.47113e+07	1.47113e+07	0.00396451	2.53772	0.200204	0.397945	rep1	Yes
31	Cluster42736	Peptide	SKSSPDAEK	519.626	1555.85	1555.86	1.93	3	2.41	0	0.95	iTRAQ8plex[+304.20536] (N-term); iTRAQ8plex[+304.20536] (K2); iTRAQ8plex[+304.20536] (K9)	2	1	1.27359e+07	1.27359e+07	1.91459	1.20808	0.0782099	946.707	rep1	Yes
31	Cluster42736	Peptide	SSPDAEK	671.375	1340.73	1036.53	9.5	2	3.23	3.01	0.95	iTRAQ8plex[+304.20536] (K7)	2	2	4.05669e+08	1263687634	1.61803	5.31683	0.416606	2.11486	rep1	Yes
31	Cluster42736	Peptide	SSPDAEK	671.374	1340.73	1036.53	3.09	2	2.31	0	0.95	iTRAQ8plex[+304.20536] (N-term); iTRAQ8plex[+304.20536] (K7)	2	5	1.85404e+07	3.93844e+07	1.04018	6.46965	39.2697	0.526854	rep2	Yes
31	Cluster42736	Peptide	SSPDAEK	823.476	1644.94	1644.94	3.04	2	2.31	0	0.95	iTRAQ8plex[+304.20536] (N-term); iTRAQ8plex[+304.20536] (K7); iTRAQ8plex[+304.20536] (S2)	2	1	2.25175e+06	2.25175e+06	1.05669	0.0814458	22.7968	4.77685	rep2	Yes
31	Cluster42736	Peptide	SSPDAEK	532.283	1062.55	1062.55	1.69	2	2.31	0	0.95	Delta:H(2)C(2)[+26.01565] (N-term); iTRAQ8plex[+304.20536] (K7)	2	1	2.06941e+07	2.06941e+07	1.4877	0.68955	0.209251	1.45066	rep1	Yes
31	Cluster42736	Peptide	TLIDKK	815.534	1629.05	1629.06	2.82	2	2.31	0	0.95	iTRAQ8plex[+304.20536] (N-term); iTRAQ8plex[+304.20536] (K5); iTRAQ8plex[+304.20536] (K6)	2	1	4.08972e+06	4.08972e+06	3.66232	0.118964	21.4443	213.334	rep1	Yes
31	Cluster42736	Peptide	VGPPPPPSGGLPGTDNSDQAR	1021.5	2040.98	2040.99	0.98	2	2.31	0	0.95	Delta:H(2)C(2)[+26.01565] (N-term)	2	16	4.8388e+06	1.01542e+08	0	0	0	0	rep1	No
31	Cluster42736	Peptide	VGPPPPPSGGLPGTDNSDQAR	1021.99	2041.97	2041.97	0.98	2	2.31	0	0.95	Delta:H(2)C(2)[+26.01565] (N-term); Deamidated[+0.984016] (N16)	2	4	3.58169e+06	1.53609e+07	0	0	0	0	rep1	No
31	Cluster42736	Peptide	VGPPPPPSGGLPGTDNSDQAR	1160.59	2319.17	2014.97	10	2	6.34	6.59	1		2	32	1.00842e+07	3.05733e+09	0	0	0	0	rep1	No
31	Cluster42736	Peptide	VGPPPPPSGGLPGTDNSDQAR	875.794	2624.36	2624.37	2.63	3	2.41	0	0.95	iTRAQ8plex[+304.20536] (N-term); iTRAQ8plex[+304.20536] (S17); Deamidated[+0.984016] (N16)	2	1	8.2118e+06	8.2118e+06	1.04174	0.191417	0.66385	0.0321844	rep2	Yes
31	Cluster42736	Peptide	VGPPPPPSGGLPGTDNSDQAR	1312.69	2623.37	2623.38	2.29	2	2.31	0	0.95	iTRAQ8plex[+304.20536] (N-term); iTRAQ8plex[+304.20536] (S8)	2	1	1.29438e+06	1.29438e+06	1.13993	5.96338	0.58195	4.56391	rep2	Yes
31	Cluster42736	Peptide	VGPPPPPSGGLPGTDNSDQAR	875.467	2623.38	2623.38	2.06	3	2.41	0	0.95	iTRAQ8plex[+304.20536] (N-term); iTRAQ8plex[+304.20536] (S17)	2	2	2.24231e+06	6.60143e+06	0.0224759	0.088518	0.6429	383.229	rep2	Yes
31	Cluster42736	Peptide	VGPPPPPSGGLPGTDNSDQAR	768.064	2301.17	2301.17	1.43	3	2.41	0	0.95	iTRAQ8plex[+304.20536] (N-term); Glu->pyro-Glu[-18.010565] (T14)	2	1	9.99325e+06	9.99325e+06	1.10355	0.145716	0.793715	85.7433	rep2	Yes
31	Cluster42736	Peptide	VGPPPPPSGGLPGTDNSDQAR	1160.59	2319.17	2086.01	0.96	2	2.31	0	0.95	iTRAQ8plex[+304.20536] (N-term)	2	48	7.62736e+06	4.5605e+08	0.012706	0.167185	0.625103	849.071	rep2	Yes
31	Cluster42736	Peptide	VGPPPPPSGGLPGTDNSDQAR	1151.59	2301.16	2301.16	0.87	2	2.31	0	0.95	iTRAQ8plex[+304.20536] (N-term); Glu->pyro-Glu[-18.010565] (S17)	2	1	2.17107e+06	2.17107e+06	0.960852	0.147959	0.628211	4.66184	rep2	Yes
31	Cluster42736	Peptide	VGPPPPPSGGLPGTDNSDQAR	1161.09	2320.16	2320.16	0.86	2	2.31	0	0.95	iTRAQ8plex[+304.20536] (N-term); Deamidated[+0.984016] (N16)	2	13	3.52316e+06	1.04536e+08	0.0211708	0.183582	0.438148	175.318	rep1	Yes
31	Cluster42736	Peptide	YDLNTVISAKPK	667.064	1998.16	1693.96	10	3	5.73	4.64	1	Acetyl[+42.010565] (K10); iTRAQ8plex[+304.20536] (K12)	2	2	2.53571e+07	5.87717e+07	1.20765	5.17495	0.607702	10.6336	rep2	Yes
31	Cluster42736	Peptide	YDLNTVISAKPK	653.056	1956.15	1651.95	9.5	3	3.48	3.55	0.95	iTRAQ8plex[+304.20536] (K12)	2	2	3.03892e+07	4.60594e+07	1.43662	2.06333	0.257928	0.559124	rep1	Yes
31	Cluster42736	Peptide	YDLNTVISAKPK	754.456	2260.34	1956.15	9.5	3	4.52	7.79	1	iTRAQ8plex[+304.20536] (K10); iTRAQ8plex[+304.20536] (K12)	2	4	3.01954e+07	1.42144e+08	3.06738	5.18294	0.584137	0.704168	rep1	Yes
31	Cluster42736	Peptide	YDLNTVISAKPK	667.064	1998.17	1956.15	2.45	3	2.41	0	0.95	iTRAQ8plex[+304.20536] (N-term); iTRAQ8plex[+304.20536] (K10); iTRAQ8plex[+304.20536] (K12)	2	17	2.53571e+07	1.68685e+08	1.20766	5.17492	0.607702	10.6336	rep2	Yes
31	Cluster42736	Peptide	YDLNTVISAKPK	992.088	1982.16	1982.17	1.92	2	2.31	0	0.95	Delta:H(2)C(2)[+26.01565] (N-term); iTRAQ8plex[+304.20536] (K10); iTRAQ8plex[+304.20536] (K12)	2	1	5.00539e+06	5.00539e+06	2.36678	4.89607	71.1196	5.73281	rep1	Yes
31	Cluster42736	Peptide	YYSETVSSLNNVLAK	1148.63	2295.25	1991.05	9.5	2	6.8	6.85	1	iTRAQ8plex[+304.20536] (K15)	2	11	2.74495e+07	3.90107e+08	4.05557	10.711	2.81981	1.86412	rep1	Yes
31	Cluster42736	Peptide	YYSETVSSLNNVLAK	651.115	2600.43	2600.44	3.69	4	2.61	0	0.95	iTRAQ8plex[+304.20536] (N-term); iTRAQ8plex[+304.20536] (K15); iTRAQ8plex[+304.20536] (S8); Deamidated[+0.984016] (N11)	2	1	1.33835e+07	1.33835e+07	73.7605	0.0859415	59.8946	0.159497	rep2	Yes
31	Cluster42736	Peptide	YYSETVSSLNNVLAK	867.492	2599.45	2599.46	2.54	3	2.41	0	0.95	iTRAQ8plex[+304.20536] (N-term); iTRAQ8plex[+304.20536] (K15); iTRAQ8plex[+304.20536] (Y2)	2	4	3.15094e+07	3.71925e+07	0.957317	0.0408424	0.612845	0.0117287	rep2	Yes
31	Cluster42736	Peptide	YYSETVSSLNNVLAK	867.492	2599.45	2599.43	2.54	3	2.41	0	0.95	iTRAQ8plex[+304.20536] (N-term); iTRAQ8plex[+304.20536] (K15); iTRAQ8plex[+304.20536] (S8)	2	7	8.62914e+06	6.29707e+07	1.16731	0.0635582	0.586071	4.34555	rep2	Yes
31	Cluster42736	Peptide	YYSETVSSLNNVLAK	766.418	2296.23	2296.23	2.22	3	2.41	0	0.95	iTRAQ8plex[+304.20536] (N-term); iTRAQ8plex[+304.20536] (K15); Deamidated[+0.984016] (N11)	2	4	1.3831e+07	7.52225e+07	1.03703	11.6008	0.800443	0.130093	rep2	Yes
31	Cluster42736	Peptide	YYSETVSSLNNVLAK	1148.63	2295.25	2295.25	1.74	2	2.31	0	0.95	iTRAQ8plex[+304.20536] (N-term); iTRAQ8plex[+304.20536] (K15)	2	17	1.41268e+07	2.0686e+08	1.42492	6.47706	0.204849	2.08229	rep1	Yes
31	Cluster42736	Peptide	YYSETVSSLNNVLAK	867.82	2600.44	2600.44	1.62	3	2.41	0	0.95	iTRAQ8plex[+304.20536] (N-term); iTRAQ8plex[+304.20536] (K15); iTRAQ8plex[+304.20536] (S8); Deamidated[+0.984016] (N10)	2	1	1.25395e+07	1.25395e+07	2.11342	1.36222	0.268172	1.12411	rep1	Yes
31	Cluster42736	Peptide	YYSETVSSLNNVLAK	867.818	2600.43	2600.44	1.62	3	2.41	0	0.95	iTRAQ8plex[+304.20536] (N-term); iTRAQ8plex[+304.20536] (K15); iTRAQ8plex[+304.20536] (Y2); Deamidated[+0.984016] (N10)	2	2	7.15673e+06	1.61731e+07	1.40214	5.71087	97.0805	2.25554	rep1	Yes
31	Cluster42736	Peptide	YYSETVSSLNNVLAK	1149.12	2296.23	1992.03	1	2	2.31	0	0.95	iTRAQ8plex[+304.20536] (N-term); iTRAQ8plex[+304.20536] (K15); Deamidated[+0.984016] (N10)	2	6	1.31951e+07	4.65234e+07	2.7555	2.03443	0.498162	3.13837	rep1	Yes
32	Cluster14154	Peptide	ALEAFR	505.8	1009.58	1009.59	2.97	2	2.31	0	0.95	iTRAQ8plex[+304.20536] (N-term)	2	2	3.32171e+07	4.59258e+07	1.07736	0.145863	0.616917	77.8413	rep2	Yes
32	Cluster14154	Peptide	AYQEQVLSNSAK	973.542	1945.07	1640.87	10	2	5.61	6.86	1	iTRAQ8plex[+304.20536] (K12)	2	6	2.87651e+07	2.87573e+08	1.09441	0.139139	0.573519	0.0103521	rep2	Yes
32	Cluster14154	Peptide	AYQEQVLSNSAK	750.764	2249.27	2249.28	2.67	3	2.41	0	0.95	iTRAQ8plex[+304.20536] (N-term); iTRAQ8plex[+304.20536] (K12); iTRAQ8plex[+304.20536] (S10)	2	1	1.34795e+07	1.34795e+07	1.05056	6.52069	0.616424	164.597	rep2	Yes
32	Cluster14154	Peptide	AYQEQVLSNSAK	821.439	1640.86	1640.86	1.71	2	2.31	0	0.95	iTRAQ8plex[+304.20536] (N-term); iTRAQ8plex[+304.20536] (K12)	2	2	1.64012e+07	3.12065e+07	0.0126999	4.66438	0.604285	794.412	rep2	Yes
32	Cluster14154	Peptide	AYQEQVLSNSAK	821.931	1641.85	1641.85	1.46	2	2.31	0	0.95	iTRAQ8plex[+304.20536] (N-term); iTRAQ8plex[+304.20536] (K12); Deamidated[+0.984016] (N9)	2	1	4.85824e+06	4.85824e+06	60.4682	43.8421	55.7621	73.8509	rep2	Yes
32	Cluster14154	Peptide	EVLYDFEDK	883.472	1764.93	1460.73	10	2	4.39	5.1	0.99	iTRAQ8plex[+304.20536] (K9)	2	7	9.42777e+06	2.50637e+08	1.13935	0.153691	0.622592	0.0994837	rep2	Yes
32	Cluster14154	Peptide	EVLYDFEDK	883.472	1764.93	1460.73	2.19	2	2.31	0	0.95	iTRAQ8plex[+304.20536] (N-term); iTRAQ8plex[+304.20536] (K9)	2	5	9.42777e+06	4.58469e+07	1.13935	0.153691	0.622592	0.0994835	rep2	Yes
32	Cluster14154	Peptide	EVLYDFEDK	1035.58	2069.13	2069.14	1.93	2	2.31	0	0.95	iTRAQ8plex[+304.20536] (N-term); iTRAQ8plex[+304.20536] (K9); iTRAQ8plex[+304.20536] (Y4)	2	1	657047	657047	24.8342	0.182303	0.611293	3.6869	rep2	Yes
32	Cluster14154	Peptide	FAQTLMEK	788.452	1574.89	1270.69	9.5	2	3.67	4.41	0.96	iTRAQ8plex[+304.20536] (K8)	2	3	9.84173e+07	3.83395e+08	1.83188	6.6147	0.0513086	0.132704	rep1	Yes
32	Cluster14154	Peptide	FAQTLMEK	788.448	1574.88	1574.88	2.67	2	2.31	0	0.95	iTRAQ8plex[+304.20536] (N-term); iTRAQ8plex[+304.20536] (K8)	2	1	1.34855e+07	1.34855e+07	1.25369	0.167667	59.6616	0.0925579	rep2	Yes
32	Cluster14154	Peptide	GAMIFYR	489.285	1464.83	1464.84	3.28	3	2.41	0	0.95	iTRAQ8plex[+304.20536] (N-term); iTRAQ8plex[+304.20536] (Y6)	2	1	2.44435e+07	2.44435e+07	1.38779	0.0623061	53.1433	0.209426	rep2	Yes
32	Cluster14154	Peptide	GFVEEDFAK	825.454	1648.89	1344.69	10	2	4.05	4.81	0.98	iTRAQ8plex[+304.20536] (K9)	2	4	6.8976e+06	3.93885e+08	1.0933	0.2667	0.668254	21.9917	rep2	Yes
32	Cluster14154	Peptide	GFVEEDFAK	825.454	1648.89	1648.9	2.67	2	2.31	0	0.95	iTRAQ8plex[+304.20536] (N-term); iTRAQ8plex[+304.20536] (K9)	2	1	6.8976e+06	6.8976e+06	1.0933	0.266699	0.668255	21.9916	rep2	Yes
32	Cluster14154	Peptide	GLELIPSENFTSVSVMQAVGSVMTNK	1116.27	3345.77	3041.57	10	3	5.26	6.51	1	iTRAQ8plex[+304.20536] (K26)	2	5	1.97206e+07	1.14523e+08	0.0349691	0.112468	47.2785	0.290238	rep2	Yes
32	Cluster14154	Peptide	GLELIPSENFTSVSVMQAVGSVMTNK	1116.27	3345.77	3345.77	1.79	3	2.41	0	0.95	iTRAQ8plex[+304.20536] (N-term); iTRAQ8plex[+304.20536] (K26)	2	3	3.87046e+06	2.57578e+07	1.08855	7.36067	0.657105	0.321747	rep2	Yes
32	Cluster14154	Peptide	GLELIPSENFTSVSVMQAVGSVMTNK	837.701	3346.77	3346.78	1.2	4	2.61	0	0.95	iTRAQ8plex[+304.20536] (N-term); iTRAQ8plex[+304.20536] (K26); Deamidated[+0.984016] (N9)	2	1	2.40397e+06	2.40397e+06	0.0553231	142.258	20.1092	0.335923	rep1	Yes
32	Cluster14154	Peptide	HDVEEFAK	791.935	1581.85	1277.66	9.5	2	3.86	4.58	0.97	iTRAQ8plex[+304.20536] (K8)	2	11	2.25072e+07	6.31643e+08	1.05618	3.29389	0.348311	0.750636	rep1	Yes
32	Cluster14154	Peptide	HDVEEFAK	791.932	1581.85	1581.85	2.53	2	2.31	0	0.95	iTRAQ8plex[+304.20536] (N-term); iTRAQ8plex[+304.20536] (K8)	2	8	5.50715e+06	7.04532e+07	1.0848	0.384182	0.627476	1.93777	rep2	Yes
32	Cluster14154	Peptide	LDESTGFIDYDQMEK	1200.1	2398.18	2093.98	10	2	4.59	5.83	1	iTRAQ8plex[+304.20536] (K15)	2	3	6.05218e+06	1.34368e+08	1.2101	0.171923	0.598888	34.0775	rep2	Yes
32	Cluster14154	Peptide	LDESTGFIDYDQMEK	1200.1	2398.18	2398.18	0.83	2	2.31	0	0.95	iTRAQ8plex[+304.20536] (N-term); iTRAQ8plex[+304.20536] (K15)	2	2	6.05218e+06	1.0265e+07	1.2101	0.171923	0.598889	34.0773	rep2	Yes
32	Cluster14154	Peptide	LIVAGASAYAR	698.414	1394.81	1090.61	10	2	3.17	2.57	0.95		2	1	48649109	48649109	0	0	0	0	rep2	No
32	Cluster14154	Peptide	MGTPALTSR	475.241	948.467	948.47	2.78	2	2.78	3.16	0.95	Oxidation[+15.994915] (M1)	2	2	2.85967e+07	5.25448e+07	0	0	0	0	rep1	No
32	Cluster14154	Peptide	MGTPALTSR	619.346	1236.68	932.475	10	2	2.84	2.98	0.95		2	1	1.35821e+08	1.35821e+08	0	0	0	0	rep1	No
32	Cluster14154	Peptide	NTVPGDVSAMVPGGIR	630.673	1888.99	1584.79	10	3	3.67	3.75	0.97	Oxidation[+15.994915] (M10)	2	2	4.02404e+07	1.98666e+08	0	0	0	0	rep2	No
32	Cluster14154	Peptide	NTVPGDVSAMVPGGIR	937.506	1873	1568.8	10	2	4.56	4.89	0.98		2	2	1.16764e+08	2.23506e+08	0	0	0	0	rep1	No
32	Cluster14154	Peptide	QATTSEYK	768.426	1534.84	1230.64	10	2	3.66	4.07	0.95	iTRAQ8plex[+304.20536] (K8)	2	4	1.66242e+07	1.57824e+08	1.06299	0.132733	0.59663	1.90613	rep2	Yes
32	Cluster14154	Peptide	QATTSEYK	768.426	1534.84	1230.64	3.25	2	2.31	0	0.95	iTRAQ8plex[+304.20536] (N-term); iTRAQ8plex[+304.20536] (K8)	2	2	1.66242e+07	4.10207e+07	1.06299	0.132733	0.596629	1.90613	rep2	Yes
32	Cluster14154	Peptide	QATTSEYK	607.812	1213.61	1213.61	0	2	2.31	0	0.95	Gln->pyro-Glu[-17.026549] (N-term); iTRAQ8plex[+304.20536] (K8)	2	1	6.10925e+06	6.10925e+06	1.43993	73.0133	39.9612	0.419847	rep2	Yes
32	Cluster14154	Peptide	QLNASLEEVDPEIADIIEHEK	1000.87	2999.59	2695.39	9.5	3	6.91	7.96	1	iTRAQ8plex[+304.20536] (K21)	2	5	9.70098e+06	7.57047e+07	2.35386	0.512126	29.3988	42.0414	rep1	Yes
32	Cluster14154	Peptide	QLNASLEEVDPEIADIIEHEK	746.646	2982.55	2982.56	2.68	4	2.61	0	0.95	Gln->pyro-Glu[-17.026549] (N-term); iTRAQ8plex[+304.20536] (K21); iTRAQ8plex[+304.20536] (S5)	2	1	1.24924e+07	1.24924e+07	0.0115896	0.109374	0.646889	43.899	rep2	Yes
32	Cluster14154	Peptide	QLNASLEEVDPEIADIIEHEK	756.396	3021.55	3021.56	2.65	4	2.61	0	0.95	iTRAQ8plex[+304.20536] (N-term); iTRAQ8plex[+304.20536] (K21); Cation:Na[+21.981943] (E12)	2	2	1.73991e+07	3.93019e+07	92.4338	0.151865	0.605265	38.5206	rep2	Yes
32	Cluster14154	Peptide	QLNASLEEVDPEIADIIEHEK	1001.2	3000.57	3000.58	2	3	2.41	0	0.95	iTRAQ8plex[+304.20536] (N-term); iTRAQ8plex[+304.20536] (K21); Deamidated[+0.984016] (N3)	2	4	1.31153e+07	7.49255e+07	1.46885	0.051914	0.677231	0.104146	rep2	Yes
32	Cluster14154	Peptide	QLNASLEEVDPEIADIIEHEK	1000.87	2999.59	2998.59	2	3	2.41	0	0.95	iTRAQ8plex[+304.20536] (N-term); iTRAQ8plex[+304.20536] (K21)	2	18	7.57191e+06	2.0378e+08	2.02319	4.35542	56.3805	12.8595	rep1	Yes
32	Cluster14154	Peptide	QLNASLEEVDPEIADIIEHEK	1340.19	2678.36	2678.36	1.49	2	2.31	0	0.95	Gln->pyro-Glu[-17.026549] (N-term); iTRAQ8plex[+304.20536] (K21)	2	1	3.42827e+06	3.42827e+06	1.21572	8.61154	0.661777	0.0770912	rep2	Yes
32	Cluster14154	Peptide	QLNASLEEVDPEIADIIEHEK	894.123	2679.34	2679.35	0.56	3	2.41	0	0.95	Gln->pyro-Glu[-17.026549] (N-term); Deamidated[+0.984016] (N3); iTRAQ8plex[+304.20536] (K21)	2	3	7.34524e+06	1.30647e+07	1.40961	2.36279	0.171142	0.0682379	rep1	Yes
32	Cluster14154	Peptide	SATLFRPK	509.985	1526.93	1222.73	10	3	3.7	5.06	1	iTRAQ8plex[+304.20536] (K8)	2	3	137056557	9.9119e+08	1.13295	0.068384	56.6258	0.109218	rep2	Yes
32	Cluster14154	Peptide	SATLFRPK	764.473	1526.93	1526.94	3.93	2	2.31	0	0.95	iTRAQ8plex[+304.20536] (N-term); iTRAQ8plex[+304.20536] (K8)	2	1	5.50541e+06	5.50541e+06	108.923	0.266946	0.63288	659.288	rep2	Yes
32	Cluster14154	Peptide	SEAQGTK	664.884	1327.75	1023.55	9.5	2	3.08	3.23	0.95	iTRAQ8plex[+304.20536] (K7)	2	1	1.27976e+07	1.27976e+07	3.92667	0.976038	0.227542	1.62266	rep1	Yes
32	Cluster14154	Peptide	SEAQGTK	664.881	1327.75	1327.75	2.86	2	2.31	0	0.95	iTRAQ8plex[+304.20536] (N-term); iTRAQ8plex[+304.20536] (K7)	2	3	4.28822e+06	2.88742e+07	100.925	0.113037	50.6423	3.17335	rep2	Yes
32	Cluster14154	Peptide	VAEYFDK	740.416	1478.82	1174.62	10	2	3.27	3.77	0.95	iTRAQ8plex[+304.20536] (K7)	2	7	1.70904e+08	5.89394e+08	1.08694	0.039272	0.634624	0.0418371	rep2	Yes
32	Cluster14154	Peptide	VAEYFDK	892.518	1783.02	1783.03	2.92	2	2.31	0	0.95	iTRAQ8plex[+304.20536] (N-term); iTRAQ8plex[+304.20536] (K7); iTRAQ8plex[+304.20536] (Y4)	2	1	1.88131e+06	1.88131e+06	1.09207	0.110142	0.58553	2.95906	rep2	Yes
32	Cluster14154	Peptide	VAEYFDK	740.413	1478.81	1478.81	2.7	2	2.31	0	0.95	iTRAQ8plex[+304.20536] (N-term); iTRAQ8plex[+304.20536] (K7)	2	2	1.39037e+07	2.47148e+07	0.926688	0.102022	58.3947	6.84409	rep2	Yes
32	Cluster14154	Peptide	VKSEAQGTK	620.715	1859.12	1554.92	9.5	3	4.71	7.09	1	iTRAQ8plex[+304.20536] (K2); iTRAQ8plex[+304.20536] (K9)	2	1	3.28415e+07	3.28415e+07	0.0141018	0.077468	0.331664	0.00768695	rep1	Yes
32	Cluster14154	Peptide	VLEAVHIASNK	895.041	1788.07	1483.87	10	2	5.2	6.83	1	iTRAQ8plex[+304.20536] (K11)	2	20	2.2854e+06	4.71781e+08	1.13913	0.2225	44.1148	0.0935632	rep2	Yes
32	Cluster14154	Peptide	VLEAVHIASNK	597.358	1789.05	1789.05	2.52	3	2.41	0	0.95	iTRAQ8plex[+304.20536] (N-term); iTRAQ8plex[+304.20536] (K11); Deamidated[+0.984016] (N10)	2	1	1.75796e+07	1.75796e+07	87.194	0.318121	0.718785	38.2034	rep2	Yes
32	Cluster14154	Peptide	VLEAVHIASNK	601.688	1802.04	1802.05	2.5	3	2.41	0	0.95	iTRAQ8plex[+304.20536] (N-term); iTRAQ8plex[+304.20536] (K11); Pro->pyro-Glu[+13.979265] (H6)	2	1	4.7352e+06	4.7352e+06	1.13326	0.0717953	52.7755	63.8192	rep2	Yes
32	Cluster14154	Peptide	VLEAVHIASNK	895.041	1788.07	1788.07	2.46	2	2.31	0	0.95	iTRAQ8plex[+304.20536] (N-term); iTRAQ8plex[+304.20536] (K11)	2	28	2.2854e+06	2.78711e+08	1.13913	0.222499	44.1151	0.0935633	rep2	Yes
32	Cluster14154	Peptide	VLEAVHIASNK	698.429	2092.26	2092.27	2.44	3	2.41	0	0.95	iTRAQ8plex[+304.20536] (N-term); iTRAQ8plex[+304.20536] (K11); iTRAQ8plex[+304.20536] (S9)	2	1	1.07533e+07	1.07533e+07	0.962696	4.42347	28.8264	8.08544	rep1	Yes
32	Cluster14154	Peptide	VLEAVHIASNK	755.945	1509.87	1509.88	2.12	2	2.31	0	0.95	Delta:H(2)C(2)[+26.01565] (N-term); iTRAQ8plex[+304.20536] (K11)	2	2	1.1432e+07	3.919e+07	55.8499	5.29926	40.5055	7.46363	rep2	Yes
32	Cluster14154	Peptide	YSEGYPGAR	652.331	1302.65	998.446	10	2	3.19	2.81	0.95		2	4	3.62591e+07	1.84563e+08	0	0	0	0	rep2	No
32	Cluster14154	Peptide	YYGGNEYIDMAETLCQK	879.425	2635.25	2635.25	1.82	3	2.41	0	0.95	iTRAQ8plex[+304.20536] (N-term); iTRAQ8plex[+304.20536] (K17); Methylthio (C15)	2	10	1.49217e+07	1.88192e+08	1.17155	0.0460206	22.2084	0.910203	rep2	Yes
33	Cluster22966	Peptide	ANDFDLMYEQVK	1041.04	2080.07	1775.87	9.5	2	4.26	4.11	0.95	iTRAQ8plex[+304.20536] (K12)	2	6	3.39551e+07	3.05694e+08	1.8443	11.7225	2.62855	2.67437	rep1	Yes
33	Cluster22966	Peptide	ANDFDLMYEQVK	1041.54	2081.05	2081.06	1.92	2	2.31	0	0.95	iTRAQ8plex[+304.20536] (N-term); iTRAQ8plex[+304.20536] (K12); Deamidated[+0.984016] (N2)	2	2	6.48902e+06	2.073e+07	0.979994	0.068426	165.57	0.0325194	rep2	Yes
33	Cluster22966	Peptide	ANDFDLMYEQVK	795.766	2384.28	2384.28	1.64	3	2.41	0	0.95	iTRAQ8plex[+304.20536] (N-term); iTRAQ8plex[+304.20536] (K12); iTRAQ8plex[+304.20536] (Y8)	2	1	2.16668e+07	2.16668e+07	1.2616	1.44774	0.522879	2.63634	rep1	Yes
33	Cluster22966	Peptide	ANDFDLMYEQVK	1041.04	2080.07	2080.07	0.96	2	2.31	0	0.95	iTRAQ8plex[+304.20536] (N-term); iTRAQ8plex[+304.20536] (K12)	2	2	1.86571e+07	2.1651e+07	1.03885	2.56296	0.194307	3.5536	rep1	Yes
33	Cluster22966	Peptide	ANDFDLMYEQVK	902.441	1802.87	1802.87	0.55	2	2.31	0	0.95	Delta:H(2)C(2)[+26.01565] (N-term); Deamidated[+0.984016] (N2); iTRAQ8plex[+304.20536] (K12)	2	3	1.07899e+07	2.84642e+07	1.51375	0.255591	63.763	12.5199	rep1	Yes
33	Cluster22966	Peptide	ATAPAEAAK	719.427	1436.84	1132.64	10	2	3.92	5.68	1	iTRAQ8plex[+304.20536] (K9)	2	4	3.80694e+08	1019628579	0.883985	7.17401	0.546297	0.0240119	rep2	Yes
33	Cluster22966	Peptide	ATAPAEAAK	740.45	1478.88	1478.89	2.57	2	2.31	0	0.95	iTRAQ8plex[+304.20536] (N-term); iTRAQ8plex[+304.20536] (K9)	2	5	3.01953e+07	9.81905e+07	109.518	0.137942	0.615709	3.80012	rep2	Yes
33	Cluster22966	Peptide	ATAPAEAAK	588.828	1175.64	1175.64	1.87	2	2.31	0	0.95	Carbamyl[+43.005814] (N-term); iTRAQ8plex[+304.20536] (K9)	2	1	2.32365e+07	2.32365e+07	0.0124761	4.27625	55.1554	0.970977	rep2	Yes
33	Cluster22966	Peptide	DLYEQLIANK	908.023	1814.03	1509.83	10	2	4.54	5.7	1	iTRAQ8plex[+304.20536] (K10)	2	6	3.11549e+07	5.81942e+08	0.690235	0.0831001	0.607992	0.00960013	rep2	Yes
33	Cluster22966	Peptide	DLYEQLIANK	605.686	1814.03	1509.83	3.38	3	2.41	0	0.95	iTRAQ8plex[+304.20536] (N-term); iTRAQ8plex[+304.20536] (K10)	2	3	1.65093e+07	7.5595e+07	0.00587808	0.191003	0.608918	0.020468	rep2	Yes
33	Cluster22966	Peptide	DLYEQLIANK	768.931	1535.85	1535.85	1.69	2	2.31	0	0.95	Delta:H(2)C(2)[+26.01565] (N-term); iTRAQ8plex[+304.20536] (K10)	2	2	4.06889e+06	7.15492e+06	0.859598	0.752549	0.650031	9.62057	rep2	Yes
33	Cluster22966	Peptide	DLYEQLIANKATAPAEAAKA	1072.56	2143.1	2143.12	5.76	2	3.27	1.93	0.95	Acetyl[+42.010565] (Y3); Methyl[+14.01565] (K10)	2	1	9.65906e+06	9.65906e+06	0	0	0	0	rep2	No
33	Cluster22966	Peptide	FNYEPDTYFDHEVSVLEMDGQFDR	806.625	3222.47	3222.48	2.11	4	2.61	0	0.95	iTRAQ8plex[+304.20536] (N-term)	2	1	2.44021e+07	2.44021e+07	0.0261125	9.39252	0.273479	63.3071	rep1	Yes
33	Cluster22966	Peptide	FYGEVTQQMLK	976.541	1951.06	1646.86	10	2	5.15	5.91	1	iTRAQ8plex[+304.20536] (K11)	2	5	1.9988e+07	4.6962e+08	1.07564	0.0694921	0.575858	0.065686	rep2	Yes
33	Cluster22966	Peptide	FYGEVTQQMLK	752.762	2255.26	2255.27	2.66	3	2.41	0	0.95	iTRAQ8plex[+304.20536] (N-term); iTRAQ8plex[+304.20536] (K11); iTRAQ8plex[+304.20536] (Y2)	2	1	1.3665e+07	1.3665e+07	1.04949	0.139947	0.555738	0.0693338	rep2	Yes
33	Cluster22966	Peptide	FYGEVTQQMLK	976.541	1951.07	1951.07	2.15	2	2.31	0	0.95	iTRAQ8plex[+304.20536] (N-term); iTRAQ8plex[+304.20536] (K11)	2	4	1.9988e+07	8.42503e+07	1.07564	0.069492	0.575858	0.065686	rep2	Yes
33	Cluster22966	Peptide	GGNPDSNTLISDMTTVICLDDYHSLDR	826.389	3301.52	3301.53	2.06	4	2.61	0	0.95	iTRAQ8plex[+304.20536] (N-term); Methylthio (C18)	2	1	9.31221e+06	9.31221e+06	1.73317	0.0569896	0.346851	0.24455	rep1	Yes
33	Cluster22966	Peptide	GGNPDSNTLISDMTTVICLDDYHSLDR	902.436	3605.71	3605.72	2	4	2.61	0	0.95	iTRAQ8plex[+304.20536] (N-term); iTRAQ8plex[+304.20536] (Y22); Methylthio (C18)	2	3	1.14779e+06	2.41455e+06	0.9359	0.471439	0.594968	6.41308	rep2	Yes
33	Cluster22966	Peptide	GHSLESIK	493.629	1477.86	1173.67	10	3	3.64	4.7	1	iTRAQ8plex[+304.20536] (K8)	2	5	5.26797e+07	4.53229e+08	1.13776	0.111721	43.8337	0.613627	rep2	Yes
33	Cluster22966	Peptide	GHSLESIK	739.94	1477.86	1477.87	3.79	2	2.31	0	0.95	iTRAQ8plex[+304.20536] (N-term); iTRAQ8plex[+304.20536] (K8)	2	1	2.3266e+07	2.3266e+07	114.739	0.12764	0.558384	1.28022	rep2	Yes
33	Cluster22966	Peptide	GHSLESIK	892.041	1782.07	1782.07	2.13	2	2.31	0	0.95	iTRAQ8plex[+304.20536] (N-term); iTRAQ8plex[+304.20536] (K8); iTRAQ8plex[+304.20536] (S6)	2	2	6.2859e+06	1.18971e+07	0.00916616	0.186618	0.520054	983.006	rep2	Yes
33	Cluster22966	Peptide	GVTALDPR	566.834	1131.65	827.45	10	2	2.68	4.25	0.95		2	7	9.06968e+07	1.17165e+09	0	0	0	0	rep2	No
33	Cluster22966	Peptide	GVTALDPR	566.834	1131.65	1131.66	3	2	2.31	0	0.95	iTRAQ8plex[+304.20536] (N-term)	2	3	1.70601e+06	1.44393e+07	1.82563	1.03912	0.330445	118.811	rep1	Yes
33	Cluster22966	Peptide	HADFPGSNNGTGLFQTIVGLK	928.496	2782.46	2782.47	2.16	3	2.41	0	0.95	iTRAQ8plex[+304.20536] (N-term); iTRAQ8plex[+304.20536] (K21); Deamidated[+0.984016] (N8); Deamidated[+0.984016] (N9)	2	2	1.54315e+07	3.02473e+07	1.114	0.142116	0.666819	0.416795	rep2	Yes
33	Cluster22966	Peptide	HADFPGSNNGTGLFQTIVGLK	928.169	2781.49	2781.49	1.94	3	2.41	0	0.95	iTRAQ8plex[+304.20536] (N-term); iTRAQ8plex[+304.20536] (K21); Deamidated[+0.984016] (N9)	2	18	7.71244e+06	2.54832e+08	1.06726	0.0894006	0.639117	0.469849	rep2	Yes
33	Cluster22966	Peptide	HADFPGSNNGTGLFQTIVGLK	835.441	2503.3	2503.3	1.44	3	2.41	0	0.95	Delta:H(2)C(2)[+26.01565] (N-term); Deamidated[+0.984016] (N9); iTRAQ8plex[+304.20536] (K21)	2	2	2.38889e+07	4.04616e+07	1.10343	0.0794855	0.624863	0.0296266	rep2	Yes
33	Cluster22966	Peptide	ILVIEGLHPMFDER	847.952	1693.89	1693.89	2.6	2	2.31	0	0.95	Delta:H(2)C(2)[+26.01565] (N-term)	2	3	2.70493e+06	1.49212e+07	0	0	0	0	rep2	No
33	Cluster22966	Peptide	ILVIEGLHPMFDER	855.947	1709.88	1709.88	2.11	2	2.31	0	0.95	Delta:H(2)C(2)[+26.01565] (N-term); Oxidation[+15.994915] (M10)	2	5	1.277e+07	5.12453e+07	0	0	0	0	rep1	No
33	Cluster22966	Peptide	ILVIEGLHPMFDER	987.044	1972.07	1667.87	10	2	5.55	5.84	1		2	19	2.37261e+06	1.83735e+08	0	0	0	0	rep2	No
33	Cluster22966	Peptide	ILVIEGLHPMFDER	995.042	1988.07	1683.87	10	2	3.69	4.5	0.97	Oxidation[+15.994915] (M10)	2	26	1.04765e+07	6.24505e+08	0	0	0	0	rep1	No
33	Cluster22966	Peptide	ILVIEGLHPMFDER	658.364	1972.07	1972.07	1.67	3	2.41	0	0.95	iTRAQ8plex[+304.20536] (N-term)	2	47	8.43085e+06	2.02026e+08	1.62056	12.8394	0.335333	0.163837	rep1	Yes
33	Cluster22966	Peptide	IRDLYEQLIANK	695.414	2083.22	1779.02	10	3	4.58	6.03	1	iTRAQ8plex[+304.20536] (K12)	2	10	3.89289e+06	6.96653e+07	1.15326	0.104948	0.632128	0.220307	rep2	Yes
33	Cluster22966	Peptide	IRDLYEQLIANK	695.414	2083.22	1779.02	3.2	3	2.41	0	0.95	iTRAQ8plex[+304.20536] (N-term); iTRAQ8plex[+304.20536] (K12)	2	16	3.89289e+06	9.63106e+07	1.15326	0.104947	0.632128	0.220307	rep2	Yes
33	Cluster22966	Peptide	IRDLYEQLIANK	522.057	2084.19	2084.2	2.69	4	2.61	0	0.95	iTRAQ8plex[+304.20536] (N-term); iTRAQ8plex[+304.20536] (K12); Deamidated[+0.984016] (N11)	2	1	1.07723e+07	1.07723e+07	1.21593	0.470942	0.00372728	17.4205	rep2	Yes
33	Cluster22966	Peptide	IRDLYEQLIANK	602.684	1805.03	1805.03	1.66	3	2.41	0	0.95	Delta:H(2)C(2)[+26.01565] (N-term); iTRAQ8plex[+304.20536] (K12)	2	5	2.58098e+07	1.01808e+08	2.37017	5.65477	0.115033	2.15403	rep1	Yes
33	Cluster22966	Peptide	KLTCSYPGIK	1034.6	2067.19	2067.19	2.9	2	2.31	0	0.95	iTRAQ8plex[+304.20536] (N-term); iTRAQ8plex[+304.20536] (K1); iTRAQ8plex[+304.20536] (K10); Methylthio (C4)	2	1	298371	298371	0.875291	5.95981	0.603552	5.07084	rep2	Yes
33	Cluster22966	Peptide	KPDFDAFIDPQK	1167.16	2332.31	2332.31	1.72	2	2.31	0	0.95	iTRAQ8plex[+304.20536] (N-term); iTRAQ8plex[+304.20536] (K1); iTRAQ8plex[+304.20536] (K12)	2	6	1.35629e+06	2.355e+07	1.21796	4.79825	0.310381	2.17296	rep1	Yes
33	Cluster22966	Peptide	LTCSYPGIK	485.781	1939.09	1939.1	2.06	4	2.61	0	0.95	iTRAQ8plex[+304.20536] (N-term); iTRAQ8plex[+304.20536] (K9); iTRAQ8plex[+304.20536] (Y5); Methylthio (C3)	2	1	1.58119e+07	1.58119e+07	4.5999	2.8116	0.111576	6.08865	rep1	Yes
33	Cluster22966	Peptide	LTSVFGGAAEPPK	941.547	1881.08	1576.88	10	2	4.76	5.8	1	iTRAQ8plex[+304.20536] (K13)	2	5	9.95841e+07	2432343037	0.95653	7.86355	0.561563	0.0127605	rep2	Yes
33	Cluster22966	Peptide	LTSVFGGAAEPPK	941.547	1881.08	1881.08	2.55	2	2.31	0	0.95	iTRAQ8plex[+304.20536] (N-term); iTRAQ8plex[+304.20536] (K13)	2	1	5.27886e+06	5.27886e+06	42.7616	0.196171	0.638813	5.69796	rep2	Yes
33	Cluster22966	Peptide	LTSVFGGAAEPPK	788.928	1575.84	1575.84	2.16	2	2.31	0	0.95	Carbamyl[+43.005814] (N-term); iTRAQ8plex[+304.20536] (K13)	2	1	1.68144e+07	1.68144e+07	0.461072	1.98825	91.7016	87.0396	rep1	Yes
33	Cluster22966	Peptide	QYADAVIEVLPTQLIPDDNEGK	1012.88	3035.62	2731.42	10	3	5.6	6.07	1	iTRAQ8plex[+304.20536] (K22)	2	12	3.57729e+07	2.84996e+08	0.00993451	0.148137	0.554053	0.128792	rep2	Yes
33	Cluster22966	Peptide	QYADAVIEVLPTQLIPDDNEGK	1012.88	3035.6	2731.42	3.29	3	2.41	0	0.95	iTRAQ8plex[+304.20536] (N-term); iTRAQ8plex[+304.20536] (K22)	2	10	2.00577e+06	6.68724e+07	1.48329	0.305625	0.631767	0.234198	rep2	Yes
33	Cluster22966	Peptide	QYADAVIEVLPTQLIPDDNEGK	755.655	3018.59	3018.6	0.8	4	2.61	0	0.95	Gln->pyro-Glu[-17.026549] (N-term); iTRAQ8plex[+304.20536] (K22); iTRAQ8plex[+304.20536] (Y2)	2	2	6.32041e+06	3.11706e+07	0.0172745	14.6519	0.412765	9.0491	rep1	Yes
33	Cluster22966	Peptide	QYADAVIEVLPTQLIPDDNEGK	914.477	2740.41	2714.4	0.55	3	2.41	0	0.95	Gln->pyro-Glu[-17.026549] (N-term); iTRAQ8plex[+304.20536] (K22)	2	9	6.58716e+06	3.55195e+07	0.0534059	145.166	0.326551	1.75229	rep1	Yes
33	Cluster22966	Peptide	QYADAVIEVLPTQLIPDDNEGK	920.153	2757.43	2757.44	0.54	3	2.41	0	0.95	Delta:H(2)C(2)[+26.01565] (N-term); iTRAQ8plex[+304.20536] (K22)	2	7	6.43626e+06	5.45693e+07	0.031096	0.242583	0.0105392	12.3358	rep1	Yes
33	Cluster22966	Peptide	RLTSVFGGAAEPPK	680.066	2037.17	1732.98	10	3	5.19	6	1	iTRAQ8plex[+304.20536] (K14)	2	5	349732106	7.10183e+08	1.00454	0.0410064	0.555259	0.259116	rep2	Yes
33	Cluster22966	Peptide	RLTSVFGGAAEPPK	680.07	2037.19	2037.17	3.09	3	2.41	0	0.95	iTRAQ8plex[+304.20536] (N-term); iTRAQ8plex[+304.20536] (K14)	2	3	6.14885e+06	3.6231e+07	0.514657	2.82512	133.96	24.6808	rep2	Yes
34	Cluster23360	Peptide	DLLDFSIYLDISNEVK	1038.49	2074.96	2074.98	9.45	2	3.12	2.23	0.95	Acetyl[+42.010565] (S6); Acetyl[+42.010565] (S12); Phospho[+79.966331] (Y8); Dimethyl[+28.0313] (K16)	2	1	4.43835e+06	4.43835e+06	0	0	0	0	rep2	No
34	Cluster23360	Peptide	DLYEQLIANKATAPAEAAKA	1072.56	2143.1	2143.12	5.76	2	3.27	1.93	0.95	Acetyl[+42.010565] (Y3); Methyl[+14.01565] (K10)	2	1	9.65906e+06	9.65906e+06	0	0	0	0	rep2	No
34	Cluster23360	Peptide	GVTALDPR	566.834	1131.65	827.45	10	2	2.68	4.25	0.95		2	7	9.06968e+07	1.17165e+09	0	0	0	0	rep2	No
34	Cluster23360	Peptide	ILVIEGLHPMFDER	847.952	1693.89	1693.89	2.6	2	2.31	0	0.95	Delta:H(2)C(2)[+26.01565] (N-term)	2	3	2.70493e+06	1.49212e+07	0	0	0	0	rep2	No
34	Cluster23360	Peptide	ILVIEGLHPMFDER	855.947	1709.88	1709.88	2.11	2	2.31	0	0.95	Delta:H(2)C(2)[+26.01565] (N-term); Oxidation[+15.994915] (M10)	2	5	1.277e+07	5.12453e+07	0	0	0	0	rep1	No
34	Cluster23360	Peptide	ILVIEGLHPMFDER	987.044	1972.07	1667.87	10	2	5.55	5.84	1		2	19	2.37261e+06	1.83735e+08	0	0	0	0	rep2	No
34	Cluster23360	Peptide	ILVIEGLHPMFDER	995.042	1988.07	1683.87	10	2	3.69	4.5	0.97	Oxidation[+15.994915] (M10)	2	26	1.04765e+07	6.24505e+08	0	0	0	0	rep1	No
34	Cluster23360	Peptide	LDELIYVESHLSNLSTK	643.114	2568.42	2264.22	9.5	4	3.73	1.73	1	iTRAQ8plex[+304.20536] (K17)	2	2	4.0313e+06	5.87607e+06	1.29947	0.0966675	0.651722	0.734067	rep2	Yes
34	Cluster23360	Peptide	LDELIYVESHLSNLSTK	643.114	2568.42	2568.43	2.96	4	2.61	0	0.95	iTRAQ8plex[+304.20536] (N-term); iTRAQ8plex[+304.20536] (K17)	2	1	4.0313e+06	4.0313e+06	1.29947	0.0966675	0.651723	0.734067	rep2	Yes
34	Cluster23360	Peptide	SGIAVEKPIYNHVTGLLDAPELIQPPK	686.904	4115.38	4115.39	2.48	6	2.6	0	0.95	iTRAQ8plex[+304.20536] (N-term); iTRAQ8plex[+304.20536] (K7); iTRAQ8plex[+304.20536] (K27); iTRAQ8plex[+304.20536] (Y10)	2	1	2.29571e+06	2.29571e+06	1.44475	0.163686	0.387927	2.24345	rep1	Yes
35	Cluster55361	Peptide	EGPPVFEQPEMTLEK	1170.12	2338.23	2034.03	9.5	2	5.87	4.76	0.98	iTRAQ8plex[+304.20536] (K15)	2	13	6.86474e+07	8.15536e+08	1.30464	3.66392	1.33387	1.40638	rep1	Yes
35	Cluster55361	Peptide	EGPPVFEQPEMTLEK	780.746	2339.21	2339.22	2.31	3	2.42	0	0.95	iTRAQ8plex[+304.20536] (N-term); iTRAQ8plex[+304.20536] (K15); Deamidated[+0.984016] (Q8)	2	1	8.87892e+06	8.87892e+06	0.0115124	4.96752	0.524293	27.9778	rep2	Yes
35	Cluster55361	Peptide	EGPPVFEQPEMTLEK	787.741	2360.2	2360.2	1.78	3	2.42	0	0.95	iTRAQ8plex[+304.20536] (N-term); iTRAQ8plex[+304.20536] (K15); Cation:Na[+21.981943] (E10)	2	1	2.08733e+07	2.08733e+07	1.04394	0.122184	0.598069	0.33532	rep2	Yes
35	Cluster55361	Peptide	EGPPVFEQPEMTLEK	1170.12	2338.23	2034.03	0.98	2	2.31	0	0.95	iTRAQ8plex[+304.20536] (N-term); iTRAQ8plex[+304.20536] (K15)	2	32	1.4517e+07	4.03611e+08	5.25752	4.32816	0.230804	2.23417	rep1	Yes
35	Cluster55361	Peptide	EGPPVFEQPEMTLEK	1161.12	2320.22	2320.22	0.86	2	2.31	0	0.95	iTRAQ8plex[+304.20536] (N-term); iTRAQ8plex[+304.20536] (K15); Glu->pyro-Glu[-18.010565] (E10)	2	1	6.11582e+06	6.11582e+06	5.79225	1.20205	0.144748	10.9253	rep1	Yes
35	Cluster55361	Peptide	EGPPVFEQPEMTLEK	687.687	2060.04	2060.04	0.73	3	2.41	0	0.95	Delta:H(2)C(2)[+26.01565] (N-term); iTRAQ8plex[+304.20536] (K15)	2	6	1.02918e+07	7.96212e+07	0.899958	2.24514	28.3827	9.84896	rep1	Yes
35	Cluster55361	Peptide	VYDDEVR	600.313	1198.61	894.408	10	2	3.13	2.96	0.95		2	18	1.02948e+08	1.36512e+09	0	0	0	0	rep2	No
36	Cluster26276	Peptide	AEQWNVEVY	721.361	1440.71	1440.71	0.83	2	2.31	0	0.95	iTRAQ8plex[+304.20536] (N-term)	2	2	8.91926e+06	1.8558e+07	1.01109	1.08883	7.93797	2.21865	rep1	Yes
36	Cluster26276	Peptide	DPNATVIMLATGTGIAPFR	755.743	2264.21	1960.01	10	3	5.38	6.47	1	Oxidation[+15.994915] (M8)	2	13	9.79105e+07	4.91765e+08	0	0	0	0	rep2	No
36	Cluster26276	Peptide	DPNATVIMLATGTGIAPFR	1125.12	2248.22	1944.01	10	2	6.12	5.98	1		2	8	4.91041e+07	6.08048e+08	0	0	0	0	rep1	No
36	Cluster26276	Peptide	EQANDKGEK	966.05	1930.08	1625.88	9.5	2	3.73	4.59	0.97	iTRAQ8plex[+304.20536] (K6); iTRAQ8plex[+304.20536] (K9)	2	1	2.85408e+06	2.85408e+06	1.37569	0.0262077	0.351729	2.29539	rep1	Yes
36	Cluster26276	Peptide	EQANDKGEK	542.966	1625.87	1321.68	9.5	3	3.76	4.07	0.99	iTRAQ8plex[+304.20536] (K9)	2	2	3.87823e+06	9.82896e+06	2.24124	0.654929	26.5799	105.082	rep1	Yes
36	Cluster26276	Peptide	EQANDKGEK	644.697	1931.07	1931.07	2.49	3	2.42	0	0.95	iTRAQ8plex[+304.20536] (N-term); iTRAQ8plex[+304.20536] (K6); iTRAQ8plex[+304.20536] (K9); Deamidated[+0.984016] (N4)	2	3	1.54778e+07	3.28835e+07	0.805019	5.15794	136.557	316.71	rep2	Yes
36	Cluster26276	Peptide	EQANDKGEK	966.05	1930.08	1930.07	1.87	2	2.31	0	0.95	iTRAQ8plex[+304.20536] (N-term); iTRAQ8plex[+304.20536] (K6); iTRAQ8plex[+304.20536] (K9)	2	5	2.85408e+06	4.30593e+07	1.37569	0.0262077	0.351729	2.29538	rep1	Yes
36	Cluster26276	Peptide	ITADDAPGETWHMVFSHQGEIPYR	770.122	3076.46	2772.26	10	4	4.07	0.66	0.95	Oxidation[+15.994915] (M13)	2	1	2.59783e+07	2.59783e+07	0	0	0	0	rep2	No
36	Cluster26276	Peptide	MASTLNAAVSLTASK	747.891	1493.76	1493.78	10	2	3.38	1.93	0.95	Oxidation[+15.994915] (M1); Methyl[+14.01565] (K15)	2	1	9.85304e+06	9.85304e+06	0	0	0	0	rep2	No
36	Cluster26276	Peptide	MASTLNAAVSLTASK	768.9	1535.78	1535.79	1.87	2	3.61	2.11	0.95	Oxidation[+15.994915] (M1); Acetyl[+42.010565] (S10); Methyl[+14.01565] (K15)	2	1	3.71753e+07	3.71753e+07	0	0	0	0	rep2	No
36	Cluster26276	Peptide	MASTLNAAVSLTASK	775.904	1549.79	1549.8	5.89	2	3.6	2.2	0.95	Oxidation[+15.994915] (M1); Acetyl[+42.010565] (S10); Dimethyl[+28.0313] (K15)	2	1	6.28662e+06	6.28662e+06	0	0	0	0	rep2	No
36	Cluster26276	Peptide	VDYAISR	564.321	1126.63	822.424	10	2	2.85	3.33	0.95		2	6	6.68138e+08	9.22887e+08	0	0	0	0	rep1	No
37	Cluster23040	Peptide	AVALVLPNLK	823.541	1645.07	1645.06	2.31	2	2.31	0	0.95	iTRAQ8plex[+304.20536] (N-term); iTRAQ8plex[+304.20536] (K10)	2	7	1.10364e+07	7.20812e+07	1.15436	0.165706	0.578717	0.155885	rep2	Yes
37	Cluster23040	Peptide	GILEVCDEPLVSVDFR	1071.05	2140.08	2140.09	0.93	2	2.31	0	0.95	iTRAQ8plex[+304.20536] (N-term); Methylthio (C6)	2	1	1.18751e+07	1.18751e+07	0.0136922	0.128447	0.70342	0.292805	rep2	Yes
37	Cluster23040	Peptide	GTMTTTHSYTGDQR	625.964	1874.87	1570.67	10	3	4.4	6.97	1	Oxidation[+15.994915] (M3)	2	15	3.47603e+07	4.54864e+08	0	0	0	0	rep2	No
37	Cluster23040	Peptide	GTMTTTHSYTGDQR	830.355	1658.69	1658.7	1.45	2	2.31	0	0.95	Acetyl[+42.010565] (N-term)	2	1	4.623e+06	4.623e+06	0	0	0	0	rep2	No
37	Cluster23040	Peptide	GTMTTTHSYTGDQR	930.447	1858.88	1554.67	10	2	5.79	7.09	1		2	12	2.06474e+06	1.93223e+08	0	0	0	0	rep1	No
37	Cluster23040	Peptide	HIEAGAK	667.405	1332.79	1028.59	10	2	2.74	2.09	0.95	iTRAQ8plex[+304.20536] (K7)	2	1	6.0441e+06	6.0441e+06	0.791824	4.17123	33.3898	171.218	rep2	Yes
37	Cluster23040	Peptide	HIEAGAK	667.405	1332.8	1332.8	3.6	2	2.31	0	0.95	iTRAQ8plex[+304.20536] (N-term); iTRAQ8plex[+304.20536] (K7)	2	1	6.0441e+06	6.0441e+06	0.791826	4.17122	33.3897	171.218	rep2	Yes
37	Cluster23040	Peptide	KTFAEEVNAAFR	664.703	1991.09	1991.09	2.41	3	2.41	0	0.95	iTRAQ8plex[+304.20536] (N-term); iTRAQ8plex[+304.20536] (K1); Deamidated[+0.984016] (N8)	2	2	2.00687e+07	2.82743e+07	1.10216	0.083753	48.1413	0.476335	rep2	Yes
37	Cluster23040	Peptide	KTFAEEVNAAFR	996.06	1990.11	1990.11	1.91	2	2.31	0	0.95	iTRAQ8plex[+304.20536] (N-term); iTRAQ8plex[+304.20536] (K1)	2	30	1.48175e+06	2.38037e+08	0.0205619	0.0910696	0.293181	0.0825092	rep1	Yes
37	Cluster23040	Peptide	KTFAEEVNAAFR	576.982	1727.92	1727.91	0.83	3	5.3	3	0.95	iTRAQ8plex[+304.20536] (K1); Acetyl[+42.010565] (T2)	2	2	5.62343e+06	1.78638e+07	1.07052	0.241804	0.589689	92.4187	rep2	Yes
37	Cluster23040	Peptide	KVIITAPGK	613.741	1838.2	1838.21	3.59	3	2.41	0	0.95	iTRAQ8plex[+304.20536] (N-term); iTRAQ8plex[+304.20536] (K1); iTRAQ8plex[+304.20536] (K9)	2	2	1.40047e+07	4.10432e+07	0.665158	0.0932765	0.639992	2.84682	rep2	Yes
37	Cluster23040	Peptide	LLDASHR	372.553	1114.64	810.435	10	3	2.84	3.17	0.95		2	2	7.10209e+08	1.00049e+09	0	0	0	0	rep1	No
37	Cluster23040	Peptide	LNGIALR	530.842	1059.67	755.465	10	2	2.49	2	0.95		2	1	8.63849e+07	8.63849e+07	0	0	0	0	rep1	No
37	Cluster23040	Peptide	LNGIALR	531.333	1060.65	1060.65	1.7	2	2.31	0	0.95	iTRAQ8plex[+304.20536] (N-term); Deamidated[+0.984016] (N2)	2	7	5.11602e+06	4.28864e+07	1.01913	0.181736	0.62007	0.281756	rep2	Yes
37	Cluster23040	Peptide	NPSLLPWK	781.975	1561.93	1257.74	10	2	3.73	5.37	0.99	iTRAQ8plex[+304.20536] (K8)	2	4	2.71757e+07	1.75893e+08	0.984776	0.0684883	63.0821	0.0672011	rep2	Yes
37	Cluster23040	Peptide	NPSLLPWK	781.978	1561.94	1561.94	2.18	2	2.31	0	0.95	iTRAQ8plex[+304.20536] (N-term); iTRAQ8plex[+304.20536] (K8)	2	1	2.05172e+07	2.05172e+07	1.14233	4.72101	0.118381	2.21442	rep1	Yes
37	Cluster23040	Peptide	QASHLLK	702.94	1403.86	1099.67	9.5	2	3.22	3.68	0.95	iTRAQ8plex[+304.20536] (K7)	2	3	1.89227e+07	198261945	1.2279	0.210251	0.321828	0.00751061	rep1	Yes
37	Cluster23040	Peptide	QASHLLK	702.938	1403.86	1403.86	3.7	2	2.31	0	0.95	iTRAQ8plex[+304.20536] (N-term); iTRAQ8plex[+304.20536] (K7)	2	3	1.00697e+07	3.8972e+07	0.735804	0.0982406	0.59144	802.467	rep2	Yes
37	Cluster23040	Peptide	QASHLLK	570.836	1139.66	1139.66	2.28	2	2.31	0	0.95	Gln->pyro-Glu[-17.026549] (N-term); iTRAQ8plex[+304.20536] (K7)	2	1	2.49911e+07	2.49911e+07	0.778261	4.37106	45.0968	4.48359	rep2	Yes
37	Cluster23040	Peptide	TFAEEVNAAFR	779.91	1557.8	1253.6	10	2	4.22	4.41	0.96		2	9	2.64328e+07	4.95434e+08	0	0	0	0	rep2	No
37	Cluster23040	Peptide	TFAEEVNAAFR	779.91	1557.8	1557.81	2.44	2	2.31	0	0.95	iTRAQ8plex[+304.20536] (N-term)	2	4	2.64328e+07	6.62774e+07	0.973843	0.120422	0.546254	0.214518	rep2	Yes
37	Cluster23040	Peptide	TFAEEVNAAFR	780.403	1558.79	1558.79	1.8	2	2.31	0	0.95	iTRAQ8plex[+304.20536] (N-term); Deamidated[+0.984016] (N7)	2	2	1.16961e+07	2.85663e+07	1.33053	0.189539	0.550669	0.28603	rep2	Yes
37	Cluster23040	Peptide	VIAWYDNEWGYSQR	1046.01	2090.02	1785.81	10	2	4.34	3.75	0.95		2	2	3.44505e+06	6.3009e+06	0	0	0	0	rep2	No
37	Cluster23040	Peptide	VIAWYDNEWGYSQR	599.563	2394.22	2394.22	2.34	4	2.61	0	0.95	iTRAQ8plex[+304.20536] (N-term); iTRAQ8plex[+304.20536] (Y5)	2	2	1.60715e+07	1.62007e+07	1.10588	0.101859	0.633736	60.6845	rep2	Yes
37	Cluster23040	Peptide	VIAWYDNEWGYSQR	799.08	2394.22	2394.22	2.26	3	2.41	0	0.95	iTRAQ8plex[+304.20536] (N-term); iTRAQ8plex[+304.20536] (Y11)	2	3	7.98636e+06	1.67341e+07	1.04384	0.158742	0.555601	20.7008	rep2	Yes
37	Cluster23040	Peptide	VIAWYDNEWGYSQR	1046.01	2090.01	2090.01	1.91	2	2.31	0	0.95	iTRAQ8plex[+304.20536] (N-term)	2	3	2.85585e+06	3.33486e+07	0.0131304	6.65759	0.576771	0.0633009	rep2	Yes
37	Cluster23040	Peptide	VIITAPGK	703.96	1405.9	1101.71	10	2	3.38	2.58	0.95	iTRAQ8plex[+304.20536] (K8)	2	2	1.54571e+07	2.139e+08	0.0134429	0.0618176	50.2182	9.299	rep2	Yes
37	Cluster23040	Peptide	VIITAPGK	703.96	1405.9	1405.85	2.85	2	2.31	0	0.95	iTRAQ8plex[+304.20536] (N-term); iTRAQ8plex[+304.20536] (K8)	2	1	1.54571e+07	1.54571e+07	0.0134428	0.0618176	50.2182	9.299	rep2	Yes
37	Cluster23040	Peptide	VLDQKFGIIK	453.539	1810.12	1505.91	9.5	4	2.65	1.3	0.98	Acetyl[+42.010565] (K5); iTRAQ8plex[+304.20536] (K10)	2	1	5.71793e+06	5.71793e+06	5.62136	0.116531	80.5077	5.73884	rep1	Yes
37	Cluster23040	Peptide	VPTPNVSVVDLVVQVTK	801.484	2401.43	2097.24	10	3	4.01	6.45	1	iTRAQ8plex[+304.20536] (K17)	2	2	1.83507e+07	6.44452e+07	0.0286092	0.0484861	15.9938	0.239656	rep2	Yes
37	Cluster23040	Peptide	VVDLADIVANNWK	1033.1	2064.18	1759.98	9.5	2	6.17	7.23	1	iTRAQ8plex[+304.20536] (K13)	2	17	1.02396e+07	9.95947e+08	1.39662	1.00947	59.1866	5.70539	rep1	Yes
37	Cluster23040	Peptide	VVDLADIVANNWK	596.337	1785.99	1785.99	2.02	3	2.41	0	0.95	Delta:H(2)C(2)[+26.01565] (N-term); iTRAQ8plex[+304.20536] (K13)	2	2	1.30268e+07	1.92668e+07	0.793273	0.0812806	0.502586	35.6568	rep2	Yes
37	Cluster23040	Peptide	VVDLADIVANNWK	1033.1	2064.18	2064.16	1.94	2	2.31	0	0.95	iTRAQ8plex[+304.20536] (N-term); iTRAQ8plex[+304.20536] (K13)	2	23	7008770	2.00861e+08	1.39663	4.82927	76.5725	9.75784	rep1	Yes
37	Cluster23040	Peptide	VVDLADIVANNWK	1033.59	2065.16	2065.16	1.94	2	2.31	0	0.95	iTRAQ8plex[+304.20536] (N-term); iTRAQ8plex[+304.20536] (K13); Deamidated[+0.984016] (N10)	2	5	8.94121e+06	5.12167e+07	1.82909	2.92037	0.27953	7.81691	rep1	Yes
37	Cluster23040	Peptide	VVDLADIVANNWK	696.394	2086.16	2086.16	1.73	3	2.41	0	0.95	iTRAQ8plex[+304.20536] (N-term); iTRAQ8plex[+304.20536] (K13); Cation:Na[+21.981943] (D6)	2	1	1.95676e+07	1.95676e+07	0.970695	0.0395264	0.536476	0.194803	rep2	Yes
37	Cluster23040	Peptide	VVDLADIVANNWK	1033.59	2065.15	2065.16	0.97	2	2.31	0	0.95	iTRAQ8plex[+304.20536] (N-term); iTRAQ8plex[+304.20536] (K13); Deamidated[+0.984016] (N11)	2	2	2.99153e+06	1.06972e+07	82.2436	0.112634	43.848	0.0778443	rep2	Yes
37	Cluster23040	Peptide	YDSTLGIFDADVKPSGDAALSVDGK	1151.62	3451.84	3451.85	1.74	3	2.41	0	0.95	iTRAQ8plex[+304.20536] (N-term); iTRAQ8plex[+304.20536] (K13); iTRAQ8plex[+304.20536] (K25)	2	3	6.74762e+06	5.09235e+07	0.802922	5.89193	0.62031	0.0659221	rep2	Yes
38	Cluster25016	Peptide	DPNATVIMLATGTGIAPFR	755.743	2264.21	1960.01	10	3	5.38	6.47	1	Oxidation[+15.994915] (M8)	2	13	9.79105e+07	4.91765e+08	0	0	0	0	rep2	No
38	Cluster25016	Peptide	DPNATVIMLATGTGIAPFR	1125.12	2248.22	1944.01	10	2	6.12	5.98	1		2	8	4.91041e+07	6.08048e+08	0	0	0	0	rep1	No
38	Cluster25016	Peptide	DPNATVIMLATGTGIAPFR	750.411	2248.21	2248.21	1.6	3	2.41	0	0.95	iTRAQ8plex[+304.20536] (N-term)	2	3	3.32825e+07	6.38461e+07	0.0270194	0.20201	0.687629	0.697376	rep2	Yes
38	Cluster25016	Peptide	DPNATVIMLATGTGIAPFR	750.74	2249.2	2249.2	1.2	3	2.41	0	0.95	iTRAQ8plex[+304.20536] (N-term); Deamidated[+0.984016] (N3)	2	2	3.51459e+07	4.29818e+07	0.0392577	0.0891191	35.3531	121.828	rep1	Yes
38	Cluster25016	Peptide	EETNDK	672.363	1342.71	1342.71	2.68	2	2.31	0	0.95	iTRAQ8plex[+304.20536] (N-term); iTRAQ8plex[+304.20536] (K6)	2	1	3.33091e+06	3.33091e+06	0.0119497	2.57301	0.532713	5.41995	rep2	Yes
38	Cluster25016	Peptide	EETNDKGEK	553.298	1656.87	1352.67	9.5	3	4.02	3.52	0.95	iTRAQ8plex[+304.20536] (K9)	2	1	6.22382e+06	6.22382e+06	1.63397	1.03232	0.121444	0.460189	rep1	Yes
38	Cluster25016	Peptide	EETNDKGEK	553.298	1656.87	1961.07	1.22	3	2.41	0	0.95	iTRAQ8plex[+304.20536] (N-term); iTRAQ8plex[+304.20536] (K6); iTRAQ8plex[+304.20536] (K9)	2	3	6.22381e+06	2.60988e+07	1.634	1.03231	0.121444	0.460192	rep1	Yes
38	Cluster25016	Peptide	EGQSVGVIADGIDK	998.559	1995.1	1690.9	10	2	6.24	7.01	1	iTRAQ8plex[+304.20536] (K14)	2	2	3.01876e+07	8.18054e+07	0.00618918	0.0740652	0.507021	0.010759	rep2	Yes
38	Cluster25016	Peptide	EGQSVGVIADGIDK	767.444	2299.31	2299.31	2.22	3	2.41	0	0.95	iTRAQ8plex[+304.20536] (N-term); iTRAQ8plex[+304.20536] (K14); iTRAQ8plex[+304.20536] (S4)	2	1	2.73561e+07	2.73561e+07	1.11811	8.54072	0.612926	1.53859	rep2	Yes
38	Cluster25016	Peptide	EGQSVGVIADGIDK	866.477	1730.94	1730.94	1.39	2	2.31	0	0.95	iTRAQ8plex[+304.20536] (N-term); iTRAQ8plex[+304.20536] (K14)	2	1	1.90913e+07	1.90913e+07	0.0152115	3.62961	30.1361	5.51749	rep2	Yes
38	Cluster25016	Peptide	EGQSVGVIADGIDK	859.466	1716.92	1716.91	0.58	2	2.31	0	0.95	Delta:H(2)C(2)[+26.01565] (N-term); iTRAQ8plex[+304.20536] (K14)	2	4	9.50123e+06	5.12284e+07	0.0133343	0.0636147	0.315998	33.3613	rep1	Yes
38	Cluster25016	Peptide	EGQSVGVIADGIDKNGKPHK	811.467	3241.84	3241.86	2.71	4	2.61	0	0.95	iTRAQ8plex[+304.20536] (N-term); iTRAQ8plex[+304.20536] (K14); iTRAQ8plex[+304.20536] (K17); iTRAQ8plex[+304.20536] (K20)	2	3	1.84776e+07	7.40182e+07	0.0255227	0.0908659	0.567868	5.62111	rep2	Yes
38	Cluster25016	Peptide	EPYTGK	651.876	1301.74	1301.74	3.69	2	2.31	0	0.95	iTRAQ8plex[+304.20536] (N-term); iTRAQ8plex[+304.20536] (K6)	2	1	1.9913e+07	1.9913e+07	0.0106771	0.224544	0.549062	1.65038	rep2	Yes
38	Cluster25016	Peptide	GIDDIMVSLAANDGIDWFDYK	989.506	2965.49	2661.29	9.5	3	4.89	5.78	1	iTRAQ8plex[+304.20536] (K21)	2	3	5.15923e+07	1.38655e+08	0.005523	0.0147809	0.00134949	19.9432	rep1	Yes
38	Cluster25016	Peptide	GIDDIMVSLAANDGIDWFDYK	742.38	2965.49	2965.49	1.89	4	2.61	0	0.95	iTRAQ8plex[+304.20536] (N-term); iTRAQ8plex[+304.20536] (K21)	2	1	5.0902e+06	5.0902e+06	0.0195384	6.30163	0.585097	0.645213	rep2	Yes
38	Cluster25016	Peptide	GVCSNFLCDLKPGSDVK	697.609	2786.41	2786.41	2.87	4	2.61	0	0.95	iTRAQ8plex[+304.20536] (N-term); iTRAQ8plex[+304.20536] (K11); iTRAQ8plex[+304.20536] (K17); Methylthio (C3); Methylthio (C8); Deamidated[+0.984016] (N5)	2	2	1.61025e+07	4.53802e+07	1.03424	0.0367699	0.679819	0.866621	rep2	Yes
38	Cluster25016	Peptide	GVCSNFLCDLKPGSDVK	558.093	2785.42	2707.47	2.59	5	2.61	0	0.95	iTRAQ8plex[+304.20536] (N-term); iTRAQ8plex[+304.20536] (K11); iTRAQ8plex[+304.20536] (K17); Methylthio (C3); Methylthio (C8)	2	17	1.26145e+07	6.68902e+07	1.07135	0.0563197	24.8384	1.63596	rep2	Yes
38	Cluster25016	Peptide	ITADDAPGETWHMVFSHQGEIPYR	770.122	3076.46	2772.26	10	4	4.07	0.66	0.95	Oxidation[+15.994915] (M13)	2	1	2.59783e+07	2.59783e+07	0	0	0	0	rep2	No
38	Cluster25016	Peptide	KAEQWNVEVY	1089.62	2177.21	2177.22	2.76	2	2.31	0	0.95	iTRAQ8plex[+304.20536] (N-term); iTRAQ8plex[+304.20536] (K1); iTRAQ8plex[+304.20536] (Y10)	2	1	1.77752e+06	1.77752e+06	1.10472	6.66356	0.650972	4.68575	rep2	Yes
38	Cluster25016	Peptide	KNEEGVITNK	682.404	2044.19	2044.19	2.35	3	2.41	0	0.95	iTRAQ8plex[+304.20536] (N-term); iTRAQ8plex[+304.20536] (K1); iTRAQ8plex[+304.20536] (K10); Deamidated[+0.984016] (N2)	2	1	5.43629e+06	5.43629e+06	113.399	0.0820604	0.47035	241.133	rep2	Yes
38	Cluster25016	Peptide	KNEEGVITNK	870.511	1739.01	1739.01	1.96	2	2.31	0	0.95	iTRAQ8plex[+304.20536] (N-term); iTRAQ8plex[+304.20536] (K1); iTRAQ8plex[+304.20536] (K10)	2	7	7.20721e+06	9.50292e+07	0.839441	0.678024	0.525975	244.476	rep2	Yes
38	Cluster25016	Peptide	LVYTNDAGEVVK	958.552	1915.08	1610.88	10	2	5	4.61	0.97	iTRAQ8plex[+304.20536] (K12)	2	4	2.95186e+06	1.52187e+08	0.00925552	0.136769	0.699455	5.22137	rep2	Yes
38	Cluster25016	Peptide	LVYTNDAGEVVK	644.039	1929.09	1929.1	2.8	3	2.41	0	0.95	iTRAQ8plex[+304.20536] (N-term); iTRAQ8plex[+304.20536] (K12)	2	1	1.52011e+07	1.52011e+07	111.804	0.0626621	0.674244	1.07037	rep2	Yes
38	Cluster25016	Peptide	LVYTNDAGEVVK	1110.65	2219.29	2219.29	1.8	2	2.31	0	0.95	iTRAQ8plex[+304.20536] (N-term); iTRAQ8plex[+304.20536] (K12); iTRAQ8plex[+304.20536] (Y3)	2	1	4.98356e+06	4.98356e+06	0.00854711	0.0674886	117.98	0.00881427	rep1	Yes
38	Cluster25016	Peptide	LVYTNDAGEVVK	959.04	1916.07	1916.07	1.25	2	2.31	0	0.95	iTRAQ8plex[+304.20536] (N-term); iTRAQ8plex[+304.20536] (K12); Deamidated[+0.984016] (N5)	2	3	1.06683e+07	3.16831e+07	1.13275	0.228264	0.630853	0.029904	rep2	Yes
38	Cluster25016	Peptide	MAQYAPELWELLK	1100.62	2199.22	1895.02	9.5	2	5.33	6.7	1	iTRAQ8plex[+304.20536] (K13)	2	12	8.22988e+06	2.14731e+08	1.58661	3.42909	1.05526	2.34344	rep1	Yes
38	Cluster25016	Peptide	MAQYAPELWELLK	738.736	2213.19	2213.19	2.3	3	2.41	0	0.95	iTRAQ8plex[+304.20536] (N-term); iTRAQ8plex[+304.20536] (K13); Pro->pyro-Glu[+13.979265] (P6)	2	1	1.23051e+07	1.23051e+07	0.0072043	3.99884	114.564	0.0865524	rep1	Yes
38	Cluster25016	Peptide	MAQYAPELWELLK	741.407	2221.2	2221.2	2.16	3	2.41	0	0.95	iTRAQ8plex[+304.20536] (N-term); iTRAQ8plex[+304.20536] (K13); Cation:Na[+21.981943] (E10)	2	1	6.68091e+06	6.68091e+06	1.69765	0.0250709	0.00188822	2.38557	rep1	Yes
38	Cluster25016	Peptide	MAQYAPELWELLK	1100.62	2199.21	1911.01	2.09	2	2.31	0	0.95	iTRAQ8plex[+304.20536] (N-term); iTRAQ8plex[+304.20536] (K13)	2	24	4.71137e+06	1.73094e+08	1.64466	6.00918	19.906	441.621	rep1	Yes
38	Cluster25016	Peptide	MAQYAPELWELLK	641.353	1921.04	1921.04	1.41	3	2.41	0	0.95	Delta:H(2)C(2)[+26.01565] (N-term); iTRAQ8plex[+304.20536] (K13)	2	1	2.09443e+07	2.09443e+07	0.0240898	0.0246412	92.415	0.135805	rep1	Yes
38	Cluster25016	Peptide	MAQYAPELWELLK	969.52	1937.03	1937.03	1.24	2	2.31	0	0.95	Acetyl[+42.010565] (N-term); iTRAQ8plex[+304.20536] (K13)	2	2	1.07789e+07	2.16664e+07	1.18858	0.119523	0.629343	0.334973	rep2	Yes
38	Cluster25016	Peptide	MAQYAPELWELLK	969.52	1937.03	1937.03	1.14	2	2.52	2	0.95	Acetyl[+42.010565] (Y4); iTRAQ8plex[+304.20536] (K13)	2	1	1.07789e+07	1.07789e+07	1.18858	0.119523	0.629343	0.334974	rep2	Yes
38	Cluster25016	Peptide	MATALNAAVSLTSSK	768.902	1535.79	1535.79	1.26	2	2.85	1.75	0.95	Oxidation[+15.994915] (M1); Acetyl[+42.010565] (T3); Methyl[+14.01565] (K15)	2	1	9.713e+06	9.713e+06	0	0	0	0	rep2	No
38	Cluster25016	Peptide	NEEGVITNK	806.46	1610.9	1306.7	9.5	2	4.09	5.26	0.99	iTRAQ8plex[+304.20536] (K9)	2	2	6.49651e+07	1.7901e+08	1.39013	4.8142	0.343707	0.139704	rep1	Yes
38	Cluster25016	Peptide	RLVYTNDAGEVVK	691.403	2071.19	1766.98	10	3	6.19	7.78	1	iTRAQ8plex[+304.20536] (K13)	2	3	1.25518e+07	4.26789e+07	1.69477	5.46605	23.1518	203.56	rep2	Yes
38	Cluster25016	Peptide	RLVYTNDAGEVVK	691.403	2071.19	2071.19	2.46	3	2.41	0	0.95	iTRAQ8plex[+304.20536] (N-term); iTRAQ8plex[+304.20536] (K13)	2	2	1.25518e+07	1.32504e+07	1.69476	5.46605	23.1518	203.56	rep2	Yes
38	Cluster25016	Peptide	RLVYTNDAGEVVK	691.73	2072.17	2072.17	2.32	3	2.41	0	0.95	iTRAQ8plex[+304.20536] (N-term); iTRAQ8plex[+304.20536] (K13); Deamidated[+0.984016] (N6)	2	1	1.2136e+07	1.2136e+07	69.1409	0.114652	30.9604	253.418	rep2	Yes
38	Cluster25016	Peptide	VDYAISR	564.321	1126.63	822.424	10	2	2.85	3.33	0.95		2	6	6.68138e+08	9.22887e+08	0	0	0	0	rep1	No
38	Cluster25016	Peptide	VDYAISR	716.422	1430.83	1430.83	2.66	2	2.31	0	0.95	iTRAQ8plex[+304.20536] (N-term); iTRAQ8plex[+304.20536] (S6)	2	1	1.76045e+07	1.76045e+07	0.640378	4.67083	55.2242	1.53884	rep2	Yes
38	Cluster25016	Peptide	VDYAISR	376.549	1126.62	1126.63	2.4	3	2.41	0	0.95	iTRAQ8plex[+304.20536] (N-term)	2	4	2.05938e+07	6.79976e+07	1.19243	4.62121	24.8671	0.854119	rep2	Yes
38	Cluster25016	Peptide	VDYAISR	716.424	1430.83	1430.83	1.68	2	2.31	0	0.95	iTRAQ8plex[+304.20536] (N-term); iTRAQ8plex[+304.20536] (Y3)	2	2	1.4688e+07	4.29856e+07	2.07686	1.16196	0.14258	1.48073	rep1	Yes
38	Cluster25016	Peptide	VLLNTK	648.426	1294.84	990.638	10	2	2.76	2.38	0.95	iTRAQ8plex[+304.20536] (K6)	2	5	6.25283e+07	9.1282e+08	1.07552	0.123609	0.557124	1.66996	rep2	Yes
38	Cluster25016	Peptide	VLLNTK	648.425	1294.83	1294.84	2.47	2	2.31	0	0.95	iTRAQ8plex[+304.20536] (N-term); iTRAQ8plex[+304.20536] (K6)	2	1	1.08845e+07	1.08845e+07	89.9443	0.0640967	0.0929594	1.8132	rep2	Yes
39	Cluster25063	Peptide	DSPFDVIAINDTGGVK	1128.62	2255.23	1951.02	9.5	2	4.99	5.84	1	iTRAQ8plex[+304.20536] (K16)	2	2	4.9547e+06	5.57786e+07	0.96176	3.08032	0.698047	0.0271464	rep2	Yes
39	Cluster25063	Peptide	DSPFDVIAINDTGGVK	1128.62	2255.23	2255.23	1.77	2	2.31	0	0.95	iTRAQ8plex[+304.20536] (N-term); iTRAQ8plex[+304.20536] (K16)	2	1	4.9547e+06	4.9547e+06	0.961763	3.0803	0.698048	0.0271465	rep2	Yes
39	Cluster25063	Peptide	GTMTTTHSYTGDQR	625.964	1874.87	1570.67	10	3	4.4	6.97	1	Oxidation[+15.994915] (M3)	2	15	3.47603e+07	4.54864e+08	0	0	0	0	rep2	No
39	Cluster25063	Peptide	GTMTTTHSYTGDQR	830.355	1658.69	1658.7	1.45	2	2.31	0	0.95	Acetyl[+42.010565] (N-term)	2	1	4.623e+06	4.623e+06	0	0	0	0	rep2	No
39	Cluster25063	Peptide	GTMTTTHSYTGDQR	930.447	1858.88	1554.67	10	2	5.79	7.09	1		2	12	2.06474e+06	1.93223e+08	0	0	0	0	rep1	No
39	Cluster25063	Peptide	LLDASHR	372.553	1114.64	810.435	10	3	2.84	3.17	0.95		2	2	7.10209e+08	1.00049e+09	0	0	0	0	rep1	No
39	Cluster25063	Peptide	LNGIALR	530.842	1059.67	755.465	10	2	2.49	2	0.95		2	1	8.63849e+07	8.63849e+07	0	0	0	0	rep1	No
39	Cluster25063	Peptide	TFAEEVNAAFR	779.91	1557.8	1253.6	10	2	4.22	4.41	0.96		2	9	2.64328e+07	4.95434e+08	0	0	0	0	rep2	No
39	Cluster25063	Peptide	VIAWYDNEWGYSQR	1046.01	2090.02	1785.81	10	2	4.34	3.75	0.95		2	2	3.44505e+06	6.3009e+06	0	0	0	0	rep2	No
40	Cluster20640	Peptide	ALDSVER	547.31	1092.61	788.403	10	2	2.95	3.15	0.95		2	2	1.64226e+08	7.01047e+08	0	0	0	0	rep2	No
40	Cluster20640	Peptide	AQVMLPFNAFGTMAMAR	720.705	2159.09	1854.89	10	3	4.48	4.52	1		2	2	4.70118e+07	5.60034e+07	0	0	0	0	rep1	No
40	Cluster20640	Peptide	AQVMLPFNAFGTMAMAR	1080.55	2159.09	2159.09	0.93	2	2.31	0	0.95	iTRAQ8plex[+304.20536] (N-term)	2	4	1.05151e+07	6.24674e+07	1.33519	4.61834	0.667469	2.07087	rep1	Yes
40	Cluster20640	Peptide	DNPNLEDCVFR	836.388	1670.76	1670.76	1.8	2	2.31	0	0.95	iTRAQ8plex[+304.20536] (N-term); Methylthio (C8)	2	1	1.54076e+07	1.54076e+07	1.16867	0.23333	0.595346	2.96767	rep2	Yes
40	Cluster20640	Peptide	HFYDGMEIQR	533.934	1598.78	1294.58	10	3	3.6	4.8	1		2	5	4.87569e+07	1.63337e+08	0	0	0	0	rep2	No
40	Cluster20640	Peptide	IKDNPNLEDCVFR	646.994	1937.96	1937.96	2.17	3	2.41	0	0.95	Delta:H(2)C(2)[+26.01565] (N-term); iTRAQ8plex[+304.20536] (K2); Methylthio (C10)	2	3	3.20864e+07	8.43778e+07	2.25046	4.54938	0.304305	0.66186	rep1	Yes
40	Cluster20640	Peptide	IKDNPNLEDCVFR	1109.08	2216.14	2216.15	1.8	2	2.31	0	0.95	iTRAQ8plex[+304.20536] (N-term); iTRAQ8plex[+304.20536] (K2); Methylthio (C10)	2	19	1.88421e+06	2.91178e+08	2.30898	0.0440689	0.569702	0.0462008	rep1	Yes
40	Cluster20640	Peptide	IVLDGYNAPVTAGNFVDLVER	856.132	2565.37	2261.17	10	3	5.72	7.43	1		2	10	4.33252e+07	4.35696e+08	0	0	0	0	rep2	No
40	Cluster20640	Peptide	LEAGMQDMLQIVEDR	690.015	2067.02	1762.82	10	3	4.44	5.09	1	Oxidation[+15.994915] (M8)	2	3	2.84032e+07	5.76607e+07	0	0	0	0	rep1	No
40	Cluster20640	Peptide	LEAGMQDMLQIVEDR	690.016	2067.03	1762.82	10	3	5.05	5.49	1	Oxidation[+15.994915] (M5)	2	4	4.6388e+07	1.10664e+08	0	0	0	0	rep1	No
40	Cluster20640	Peptide	LEAGMQDMLQIVEDR	695.347	2083.02	1778.82	10	3	4.86	7	1	Oxidation[+15.994915] (M5); Oxidation[+15.994915] (M8)	2	5	8.11203e+07	1.47287e+08	0	0	0	0	rep1	No
40	Cluster20640	Peptide	LEAGMQDMLQIVEDR	1026.52	2051.03	1746.83	10	2	6.71	6.78	1		2	10	3.89239e+07	2.98327e+08	0	0	0	0	rep1	No
40	Cluster20640	Peptide	LEAGMQDMLQIVEDR	692.013	2073.02	2073.02	1.3	3	2.41	0	0.95	iTRAQ8plex[+304.20536] (N-term); Cation:Na[+21.981943] (D7)	2	1	1.49439e+07	1.49439e+07	0.00885731	7.33882	0.376361	0.011673	rep1	Yes
40	Cluster20640	Peptide	LEAGMQDMLQIVEDR	1026.52	2051.03	2051.02	0.98	2	2.31	0	0.95	iTRAQ8plex[+304.20536] (N-term)	2	12	1.76802e+07	1.11476e+08	1.80624	1.81124	0.489706	1.36678	rep1	Yes
40	Cluster20640	Peptide	TVPLEIMVEGNK	969.564	1937.11	1632.91	10	2	5.16	6.45	1	iTRAQ8plex[+304.20536] (K12)	2	3	7.87351e+06	1.55125e+08	1.36219	0.126742	0.568926	1068.32	rep2	Yes
40	Cluster20640	Peptide	TVPLEIMVEGNK	969.564	1937.11	1937.11	2.17	2	2.31	0	0.95	iTRAQ8plex[+304.20536] (N-term); iTRAQ8plex[+304.20536] (K12)	2	2	7.87351e+06	3.37745e+07	1.36219	0.126742	0.568925	1068.32	rep2	Yes
40	Cluster20640	Peptide	YALPIDNKPIR	636.722	1907.14	1602.94	10	3	4.23	4.75	1	iTRAQ8plex[+304.20536] (K8)	2	10	2.67341e+07	4.38075e+08	0.0111779	0.158206	0.506199	1.93513	rep2	Yes
40	Cluster20640	Peptide	YALPIDNKPIR	954.578	1907.14	1907.14	2.52	2	2.31	0	0.95	iTRAQ8plex[+304.20536] (N-term); iTRAQ8plex[+304.20536] (K8)	2	6	7.4504e+06	9.86281e+07	1.59448	0.0790733	0.546971	7.77187	rep2	Yes
41	Cluster39409	Peptide	ASDVMAILS	605.835	1209.65	905.453	10	2	2.31	2.93	0.95		2	2	5.58364e+06	1.3834e+07	0	0	0	0	rep2	No
41	Cluster39409	Peptide	ASDVMAILS	613.833	1225.65	921.448	10	2	2.58	2.93	0.95	Oxidation[+15.994915] (M5)	2	2	1.59853e+07	4.4331e+07	0	0	0	0	rep1	No
41	Cluster39409	Peptide	ASDVMAILS	605.828	1209.64	1209.66	0	2	2.31	0	0.95	iTRAQ8plex[+304.20536] (N-term)	2	8	1.2698e+07	6.07341e+07	0.0867309	59.556	0.0676963	3.1548	rep1	Yes
41	Cluster39409	Peptide	DGSNYIALR	517.766	1033.52	1033.52	2.13	2	2.31	0	0.95	Delta:H(2)C(2)[+26.01565] (N-term)	2	3	2.31048e+07	7.84606e+07	0	0	0	0	rep2	No
41	Cluster39409	Peptide	DGSNYIALR	656.861	1311.71	1007.5	10	2	3.35	3.84	0.95		2	3	2.79846e+08	3.38126e+08	0	0	0	0	rep1	No
41	Cluster39409	Peptide	DGSNYIALR	808.962	1615.91	1615.91	2.1	2	2.31	0	0.95	iTRAQ8plex[+304.20536] (N-term); iTRAQ8plex[+304.20536] (Y5)	2	3	1.74966e+07	4.0634e+07	1.69718	2.0253	0.226392	729.125	rep1	Yes
41	Cluster39409	Peptide	DGSNYIALR	657.351	1312.69	1312.69	1.83	2	2.31	0	0.95	iTRAQ8plex[+304.20536] (N-term); Deamidated[+0.984016] (N4)	2	1	3.52454e+07	3.52454e+07	1.16227	0.272975	0.667032	23.5465	rep2	Yes
41	Cluster39409	Peptide	DGSNYIALR	809.455	1616.89	1616.9	1.61	2	2.31	0	0.95	iTRAQ8plex[+304.20536] (N-term); iTRAQ8plex[+304.20536] (Y5); Deamidated[+0.984016] (N4)	2	1	8.73034e+06	8.73034e+06	1.14427	2.39533	0.256534	1.44376	rep1	Yes
41	Cluster39409	Peptide	DGSNYIALR	524.774	1047.53	1311.71	0.91	2	2.31	0	0.95	iTRAQ8plex[+304.20536] (N-term)	2	6	1.88174e+07	141409021	0.403209	2.46516	0.20122	10.0175	rep1	Yes
41	Cluster39409	Peptide	DLKPLNDR	789.971	1577.93	1273.73	10	2	2.87	2.88	0.95	iTRAQ8plex[+304.20536] (K3)	2	2	1.4368e+07	3.51498e+07	0.990227	17.4707	0.64345	275.805	rep2	Yes
41	Cluster39409	Peptide	DLKPLNDR	789.971	1577.93	1577.93	2.53	2	2.31	0	0.95	iTRAQ8plex[+304.20536] (N-term); iTRAQ8plex[+304.20536] (K3)	2	3	1.4368e+07	6.80069e+07	0.99023	17.4707	0.64345	275.805	rep2	Yes
41	Cluster39409	Peptide	DLKPLNDR	790.464	1578.91	1578.91	2.28	2	2.31	0	0.95	iTRAQ8plex[+304.20536] (N-term); iTRAQ8plex[+304.20536] (K3); Deamidated[+0.984016] (N6)	2	4	4.17043e+06	4.1017e+07	0.0202229	0.108777	77.1491	100.075	rep2	Yes
41	Cluster39409	Peptide	EDDIVGLLETEDIK	1099.11	2196.19	1891.99	10	2	5.94	6.28	1	iTRAQ8plex[+304.20536] (K14)	2	24	6.01563e+07	3.95434e+08	0.914894	10.3576	0.638666	0.0161584	rep2	Yes
41	Cluster39409	Peptide	EDDIVGLLETEDIK	1099.11	2196.19	1890.96	1.06	2	2.31	0	0.95	iTRAQ8plex[+304.20536] (N-term); iTRAQ8plex[+304.20536] (K14)	2	39	8.68033e+06	2.07597e+08	1.91839	0.025733	0.344561	6.25526	rep1	Yes
41	Cluster39409	Peptide	EDDIVGLLETEDIK	960.012	1918.01	1918.01	0.52	2	2.31	0	0.95	Delta:H(2)C(2)[+26.01565] (N-term); iTRAQ8plex[+304.20536] (K14)	2	6	4.34294e+06	3.68869e+07	0.029905	0.135513	0.34504	0.238952	rep1	Yes
41	Cluster39409	Peptide	EDDIVGLLETEDIK	951.005	1900	1899.99	0.42	2	2.31	0	0.95	Delta:H(2)C(2)[+26.01565] (N-term); Glu->pyro-Glu[-18.010565] (D3); iTRAQ8plex[+304.20536] (K14)	2	3	1.62133e+06	4.70784e+06	1.82377	7.41776	0.25234	2.87562	rep1	Yes
41	Cluster39409	Peptide	EDDIVGLLETEDIKDLKPLNDR	863.987	3451.92	3147.71	9.5	4	4.77	2.42	1	iTRAQ8plex[+304.20536] (K14); iTRAQ8plex[+304.20536] (K17)	2	6	1.78416e+06	1.82821e+07	1.58374	0.0431601	0.437912	0.14011	rep1	Yes
41	Cluster39409	Peptide	EDDIVGLLETEDIKDLKPLNDR	863.734	3450.9	3450.91	1.62	4	2.61	0	0.95	iTRAQ8plex[+304.20536] (N-term); iTRAQ8plex[+304.20536] (K14); iTRAQ8plex[+304.20536] (K17)	2	26	1.58612e+06	1.14914e+08	1.64778	5.49984	0.435018	0.0495008	rep1	Yes
41	Cluster39409	Peptide	EKPSIGTVIAVGPGTLDEEGK	602.748	3008.71	2704.51	10	5	4.98	2.57	1	iTRAQ8plex[+304.20536] (K2); iTRAQ8plex[+304.20536] (K21)	2	1	2.52821e+07	2.52821e+07	0.0176889	9.61018	0.530618	0.241111	rep2	Yes
41	Cluster39409	Peptide	GKDGSNYIALR	601.351	1801.03	1801.03	2.33	3	2.41	0	0.95	iTRAQ8plex[+304.20536] (N-term); iTRAQ8plex[+304.20536] (K2)	2	1	2.89394e+07	2.89394e+07	1.52775	2.47296	0.20347	2.18472	rep1	Yes
41	Cluster39409	Peptide	IDITVPTGAQIIYSK	743.108	2226.3	1922.1	9.5	3	4.41	6.44	1	iTRAQ8plex[+304.20536] (K15)	2	5	2.18805e+08	3.7589e+08	1.33704	4.62022	0.370278	1.74678	rep1	Yes
41	Cluster39409	Peptide	IDITVPTGAQIIYSK	743.109	2226.3	2226.31	1.75	3	2.41	0	0.95	iTRAQ8plex[+304.20536] (N-term); iTRAQ8plex[+304.20536] (K15)	2	2	3.08429e+07	4.65465e+07	0.00754378	0.115615	0.625582	0.015249	rep2	Yes
41	Cluster39409	Peptide	IDITVPTGAQIIYSK	1266.26	2530.5	2530.5	1.58	2	2.31	0	0.95	iTRAQ8plex[+304.20536] (N-term); iTRAQ8plex[+304.20536] (K15); iTRAQ8plex[+304.20536] (Y13)	2	1	266171	266171	1.08231	6.63375	0.63294	3.90186	rep2	Yes
41	Cluster39409	Peptide	IKEAEEK	880.035	1758.06	1758.06	2.84	2	2.31	0	0.95	iTRAQ8plex[+304.20536] (N-term); iTRAQ8plex[+304.20536] (K2); iTRAQ8plex[+304.20536] (K7)	2	2	1.87424e+07	3.64141e+07	0.964239	0.073253	0.746044	2.55581	rep2	Yes
41	Cluster39409	Peptide	NKIDITVPTGAQIIYSK	694.167	2772.64	2468.45	10	4	4.73	2.86	1	iTRAQ8plex[+304.20536] (K2); iTRAQ8plex[+304.20536] (K17)	2	1	2.05706e+07	2.05706e+07	1.02478	0.184495	0.703136	0.159088	rep2	Yes
41	Cluster39409	Peptide	TAGGLLLTETTK	907.045	1812.07	1507.88	10	2	5.69	6.91	1	iTRAQ8plex[+304.20536] (K12)	2	4	7.06524e+06	3.94469e+08	1.05865	0.254713	0.617172	0.0187823	rep2	Yes
41	Cluster39409	Peptide	TAGGLLLTETTK	907.045	1812.07	1812.08	2.54	2	2.31	0	0.95	iTRAQ8plex[+304.20536] (N-term); iTRAQ8plex[+304.20536] (K12)	2	3	7.06524e+06	6.44525e+07	1.05865	0.254713	0.617171	0.0187823	rep2	Yes
41	Cluster39409	Peptide	TAGGLLLTETTK	767.937	1533.86	1533.86	0	2	2.31	0	0.95	Delta:H(2)C(2)[+26.01565] (N-term); iTRAQ8plex[+304.20536] (K12)	2	1	5.66114e+06	5.66114e+06	1.10744	7.42462	39.8716	165.199	rep2	Yes
41	Cluster39409	Peptide	TAGGLLLTETTK	804.954	1607.89	1607.89	0	2	2.31	0	0.95	Carbamyl[+43.005814] (N-term); iTRAQ8plex[+304.20536] (K12)	2	1	1.39552e+07	1.39552e+07	1.73657	3.17709	18.5773	0.96415	rep1	Yes
41	Cluster39409	Peptide	TMGGILLPSTAQSKPQGGEVVAVGEGR	1493.29	2984.56	2984.59	10	2	3.02	4.23	0.95	Acetyl[+42.010565] (T1); iTRAQ8plex[+304.20536] (K14)	2	1	1.16093e+06	1.16093e+06	0.725466	5.98438	0.62912	0.133568	rep2	Yes
41	Cluster39409	Peptide	TMGGILLPSTAQSKPQGGEVVAVGEGR	1083.27	3246.79	2942.58	9.5	3	5.9	7.89	1	iTRAQ8plex[+304.20536] (K14)	2	5	2.06822e+07	9.02986e+07	0.00652659	4.93261	0.411874	1.6889	rep1	Yes
41	Cluster39409	Peptide	TMGGILLPSTAQSKPQGGEVVAVGEGR	888.754	3550.99	3551	2.93	4	2.61	0	0.95	iTRAQ8plex[+304.20536] (N-term); iTRAQ8plex[+304.20536] (K14); iTRAQ8plex[+304.20536] (S13)	2	1	3.15983e+06	3.15983e+06	1.14735	0.150202	0.651246	3.59934	rep2	Yes
41	Cluster39409	Peptide	TMGGILLPSTAQSKPQGGEVVAVGEGR	990.54	2968.6	2968.6	2.22	3	2.41	0	0.95	Delta:H(2)C(2)[+26.01565] (N-term); iTRAQ8plex[+304.20536] (K14)	2	1	5.85768e+06	5.85768e+06	79.2052	0.19357	0.708172	4.17098	rep2	Yes
41	Cluster39409	Peptide	TMGGILLPSTAQSKPQGGEVVAVGEGR	1083.27	3246.78	3246.78	1.85	3	2.41	0	0.95	iTRAQ8plex[+304.20536] (N-term); iTRAQ8plex[+304.20536] (K14)	2	4	2.06822e+07	5.87814e+07	0.00652658	4.93257	0.411873	1.6889	rep1	Yes
41	Cluster39409	Peptide	TMGGILLPSTAQSKPQGGEVVAVGEGR	899.243	3592.94	3592.95	1.78	4	2.61	0	0.95	iTRAQ8plex[+304.20536] (N-term); iTRAQ8plex[+304.20536] (K14); Deamidated[+0.984016] (Q12)	2	1	6.93688e+06	6.93688e+06	1.72466	0.168307	21.9304	118.486	rep1	Yes
41	Cluster39409	Peptide	VAEAEEK	692.398	1382.78	1078.58	9.5	2	3.12	2.82	0.95	iTRAQ8plex[+304.20536] (K7)	2	5	4.35736e+08	4.78849e+08	1.42043	5.23672	0.135546	0.330729	rep1	Yes
41	Cluster39409	Peptide	VAEAEEK	692.397	1382.78	1078.58	3.71	2	2.31	0	0.95	iTRAQ8plex[+304.20536] (N-term); iTRAQ8plex[+304.20536] (K7)	2	9	1.46969e+07	8.35171e+07	1.13068	0.294228	26.8028	0.363303	rep2	Yes
41	Cluster39409	Peptide	VQPLSISTGSTVLYSK	1144.67	2287.32	1983.12	10	2	6.64	7.66	1	iTRAQ8plex[+304.20536] (K16)	2	5	1.22419e+07	3.34679e+08	0.974757	0.0447229	0.708668	3.29861	rep2	Yes
41	Cluster39409	Peptide	VQPLSISTGSTVLYSK	648.888	2591.52	2591.52	2.16	4	2.61	0	0.95	iTRAQ8plex[+304.20536] (N-term); iTRAQ8plex[+304.20536] (K16); iTRAQ8plex[+304.20536] (S10)	2	3	1.99382e+07	4.06029e+07	5.15695	2.61416	0.130217	2.02766	rep1	Yes
41	Cluster39409	Peptide	VQPLSISTGSTVLYSK	864.849	2591.52	2591.53	2.08	3	2.41	0	0.95	iTRAQ8plex[+304.20536] (N-term); iTRAQ8plex[+304.20536] (K16); iTRAQ8plex[+304.20536] (Y14)	2	1	2.21184e+06	2.21184e+06	1.10391	0.52811	0.668555	406.763	rep2	Yes
41	Cluster39409	Peptide	VQPLSISTGSTVLYSK	1144.67	2287.32	2287.32	1.75	2	2.31	0	0.95	iTRAQ8plex[+304.20536] (N-term); iTRAQ8plex[+304.20536] (K16)	2	2	12241880	2.79852e+07	0.974757	0.0447229	0.708669	3.29861	rep2	Yes
41	Cluster39409	Peptide	YAGNDFK	711.892	1421.77	1117.57	10	2	3.16	3.07	0.95	iTRAQ8plex[+304.20536] (K7)	2	8	8.59858e+06	5.69349e+08	0.992508	0.367078	39.5184	2.19049	rep2	Yes
41	Cluster39409	Peptide	YAGNDFK	711.894	1421.77	1421.77	2.53	2	2.31	0	0.95	iTRAQ8plex[+304.20536] (N-term); iTRAQ8plex[+304.20536] (K7)	2	7	825601	5.82869e+07	1.56356	0.541931	0.375489	2.26961	rep1	Yes
41	Cluster39409	Peptide	YAGTEVEFNDEK	1005.51	2009.01	1704.81	10	2	5.98	6.89	1	iTRAQ8plex[+304.20536] (K12)	2	8	8.78455e+06	3.21695e+08	0.948752	0.0516365	0.718982	0.0735347	rep2	Yes
41	Cluster39409	Peptide	YAGTEVEFNDEK	1157.62	2313.22	2313.22	2.59	2	2.31	0	0.95	iTRAQ8plex[+304.20536] (N-term); iTRAQ8plex[+304.20536] (K12); iTRAQ8plex[+304.20536] (Y1)	2	1	734278	734278	1.69245	5.64881	28.5771	2.31384	rep1	Yes
41	Cluster39409	Peptide	YAGTEVEFNDEK	1005.51	2009.01	1704.81	2.35	2	2.31	0	0.95	iTRAQ8plex[+304.20536] (N-term); iTRAQ8plex[+304.20536] (K12)	2	7	8.78455e+06	1.02827e+08	0.948749	0.0516366	0.718982	0.0735348	rep2	Yes
41	Cluster39409	Peptide	YAGTEVEFNDEK	772.406	2314.19	2314.2	2.2	3	2.41	0	0.95	iTRAQ8plex[+304.20536] (N-term); iTRAQ8plex[+304.20536] (K12); iTRAQ8plex[+304.20536] (T4); Deamidated[+0.984016] (N9)	2	1	8.33554e+06	8.33554e+06	85.825	22.8702	150.117	0.901547	rep2	Yes
41	Cluster39409	Peptide	YAGTEVEFNDEK	866.425	1730.83	1730.84	1.39	2	2.31	0	0.95	Delta:H(2)C(2)[+26.01565] (N-term); iTRAQ8plex[+304.20536] (K12)	2	1	1.39695e+07	1.39695e+07	1.10029	0.096437	0.688832	6.10998	rep2	Yes
41	Cluster39409	Peptide	YAGTEVEFNDEK	1006.01	2010	2010	1	2	2.31	0	0.95	iTRAQ8plex[+304.20536] (N-term); iTRAQ8plex[+304.20536] (K12); Deamidated[+0.984016] (N9)	2	2	4.10812e+06	1.93938e+07	94.5305	0.264473	54.5634	0.0527135	rep2	Yes
41	Cluster39409	Peptide	YAGTEVEFNDEKHLILK	644.108	2572.4	2572.41	2.18	4	2.61	0	0.95	iTRAQ8plex[+304.20536] (N-term); iTRAQ8plex[+304.20536] (K12); iTRAQ8plex[+304.20536] (K17)	2	1	2.5097e+06	2.5097e+06	1.59779	0.111433	0.374491	0.0432888	rep1	Yes
41	Cluster39409	Peptide	YTSIKPLGDR	879.523	1757.03	1452.82	9.5	2	3.45	4.59	0.95	iTRAQ8plex[+304.20536] (K5)	2	4	6.9231e+06	8.20214e+07	1.662	1.65799	167.852	2.60487	rep1	Yes
41	Cluster39409	Peptide	YTSIKPLGDR	879.52	1757.02	1757.02	2.5	2	2.31	0	0.95	iTRAQ8plex[+304.20536] (N-term); iTRAQ8plex[+304.20536] (K5)	2	41	1.2756e+07	1.91315e+08	0.0113495	0.140987	0.708144	3.24155	rep2	Yes
42	Cluster22703	Peptide	AADNIAANLYAVK	971.564	1941.11	1636.91	9.5	2	5.67	6.96	1	iTRAQ8plex[+304.20536] (K13)	2	6	3.36162e+07	4.02393e+08	1.22055	10.1853	0.555683	1.92602	rep1	Yes
42	Cluster22703	Peptide	AADNIAANLYAVK	749.446	2245.31	2245.32	2.41	3	2.41	0	0.95	iTRAQ8plex[+304.20536] (N-term); iTRAQ8plex[+304.20536] (K13); iTRAQ8plex[+304.20536] (Y10)	2	1	8.32593e+06	8.32593e+06	1.09405	0.24744	50.3318	21.756	rep2	Yes
42	Cluster22703	Peptide	AADNIAANLYAVK	971.564	1941.11	1636.9	2.2	2	2.31	0	0.95	iTRAQ8plex[+304.20536] (N-term); iTRAQ8plex[+304.20536] (K13)	2	4	2.09667e+07	5.26108e+07	2.20002	4.94119	0.342655	2.73702	rep1	Yes
42	Cluster22703	Peptide	AAIQETVSATLNR	839.474	1676.93	1372.73	10	2	4.5	4.68	0.98		2	7	1.36113e+08	4.62689e+08	0	0	0	0	rep1	No
42	Cluster22703	Peptide	AAIQETVSATLNR	661.384	1981.13	1981.13	2.42	3	2.41	0	0.95	iTRAQ8plex[+304.20536] (N-term); iTRAQ8plex[+304.20536] (S8)	2	2	2.26587e+07	3.69639e+07	0.0192128	0.164705	0.617866	7.08341	rep2	Yes
42	Cluster22703	Peptide	AAIQETVSATLNR	839.474	1676.93	1372.73	2.04	2	2.31	0	0.95	iTRAQ8plex[+304.20536] (N-term)	2	7	2.03274e+07	1.16459e+08	1.11092	0.0733785	0.572255	0.103239	rep2	Yes
42	Cluster22703	Peptide	ADGGLWLLVR	702.417	1402.82	1098.62	10	2	3.45	3.9	0.95		2	5	4.232e+07	1.42296e+08	0	0	0	0	rep1	No
42	Cluster22703	Peptide	ADGGLWLLVR	702.419	1402.82	1098.62	3.28	2	2.31	0	0.95	iTRAQ8plex[+304.20536] (N-term)	2	4	2.35815e+07	8.57888e+07	1.11786	0.114389	0.677965	0.233743	rep2	Yes
42	Cluster22703	Peptide	DGGNTWAPR	500.236	998.455	998.458	2.2	2	2.31	0	0.95	Delta:H(2)C(2)[+26.01565] (N-term)	2	2	3.32264e+07	7.05055e+07	0	0	0	0	rep2	No
42	Cluster22703	Peptide	DGGNTWAPR	639.329	1276.64	972.441	10	2	3.03	3.28	0.95		2	3	1.70855e+08	2.39319e+08	0	0	0	0	rep1	No
42	Cluster22703	Peptide	DGGNTWAPR	507.243	1012.47	1012.47	2.17	2	2.31	0	0.95	iTRAQ8plex[+304.20536] (N-term)	2	5	29428990	171748122	2.73961	8.22661	0.243306	0.398731	rep2	Yes
42	Cluster22703	Peptide	DGGNTWAPR	639.82	1277.63	1277.63	1.72	2	2.31	0	0.95	iTRAQ8plex[+304.20536] (N-term); Deamidated[+0.984016] (N4)	2	2	1.50762e+07	3.69108e+07	2.42915	4.31702	46.0991	0.866982	rep2	Yes
42	Cluster22703	Peptide	DKAADNIAANLYAVK	557.57	2226.25	1922.04	9.5	4	4.14	1.86	1	Acetyl[+42.010565] (K2); iTRAQ8plex[+304.20536] (K15)	2	1	2.07011e+07	2.07011e+07	0.00513467	4.41507	0.128706	50.4771	rep1	Yes
42	Cluster22703	Peptide	FNSISFK	725.927	1449.84	1145.64	9.5	2	3.49	4.19	0.95	iTRAQ8plex[+304.20536] (K7)	2	2	1.19163e+08	1.44325e+08	0.511279	1.47532	0.23459	3.55812	rep1	Yes
42	Cluster22703	Peptide	FVDDKK	832.507	1663	1663	2.65	2	2.31	0	0.95	iTRAQ8plex[+304.20536] (N-term); iTRAQ8plex[+304.20536] (K5); iTRAQ8plex[+304.20536] (K6)	2	3	7.6981e+06	1.67103e+07	1.06747	0.125728	0.627322	0.0541564	rep2	Yes
42	Cluster22703	Peptide	GFGILDVGYR	700.894	1399.77	1095.57	10	2	3.64	4.52	0.97		2	5	2.44567e+08	4.20024e+08	0	0	0	0	rep1	No
42	Cluster22703	Peptide	GFGILDVGYR	467.599	1399.77	1399.78	3.43	3	2.41	0	0.95	iTRAQ8plex[+304.20536] (N-term)	2	2	9.87225e+06	1.40227e+07	0.0375565	0.0768945	0.641084	0.966321	rep2	Yes
42	Cluster22703	Peptide	GFGILDVGYR	852.993	1703.97	1703.98	2.46	2	2.31	0	0.95	iTRAQ8plex[+304.20536] (N-term); iTRAQ8plex[+304.20536] (Y9)	2	14	5.33595e+06	1.88543e+08	1.07913	0.14367	0.586701	0.0441215	rep2	Yes
42	Cluster22703	Peptide	GFLLGTR	534.329	1066.64	1066.64	2.81	2	2.31	0	0.95	iTRAQ8plex[+304.20536] (N-term)	2	1	2.63892e+07	2.63892e+07	1.07057	0.145857	0.619308	0.128365	rep2	Yes
42	Cluster22703	Peptide	GFVLGNDGVLLR	782.46	1562.91	1258.7	10	2	4.55	5.5	1		2	7	1.52446e+08	3.68549e+08	0	0	0	0	rep1	No
42	Cluster22703	Peptide	GFVLGNDGVLLR	521.977	1562.91	1562.91	1.73	3	2.41	0	0.95	iTRAQ8plex[+304.20536] (N-term)	2	1	1.23878e+07	1.23878e+07	0.0420407	0.111734	0.553027	0.797623	rep2	Yes
42	Cluster22703	Peptide	GFVLGNDGVLLR	782.951	1563.89	1563.89	1.41	2	2.31	0	0.95	iTRAQ8plex[+304.20536] (N-term); Deamidated[+0.984016] (N6)	2	2	4.85876e+06	3.6759e+07	1.4617	0.14714	0.572003	20.6683	rep2	Yes
42	Cluster22703	Peptide	GGGLYLSK	701.927	1401.84	1097.64	9.5	2	3.1	3.85	0.95	iTRAQ8plex[+304.20536] (K8)	2	3	1.94118e+08	2.78481e+08	0.870246	3.45789	0.231353	1.1009	rep1	Yes
42	Cluster22703	Peptide	GGGLYLSK	701.929	1401.84	1401.85	2.85	2	2.31	0	0.95	iTRAQ8plex[+304.20536] (N-term); iTRAQ8plex[+304.20536] (K8)	2	1	1.26582e+07	1.26582e+07	79.3924	0.440614	0.618875	0.879626	rep2	Yes
42	Cluster22703	Peptide	GTGISEEFDEVPVQSR	1027.52	2053.03	1748.82	10	2	6.04	6.64	1		2	11	7.96133e+07	4.41142e+08	0	0	0	0	rep1	No
42	Cluster22703	Peptide	GTGISEEFDEVPVQSR	786.75	2357.23	2357.23	2.04	3	2.41	0	0.95	iTRAQ8plex[+304.20536] (N-term); iTRAQ8plex[+304.20536] (S5)	2	2	1.91286e+07	1.93877e+07	1.33077	0.281542	0.638997	6.87776	rep2	Yes
42	Cluster22703	Peptide	GTGISEEFDEVPVQSR	1027.52	2053.03	2053.03	0.97	2	2.31	0	0.95	iTRAQ8plex[+304.20536] (N-term)	2	12	5.17491e+06	7.96823e+07	0.883004	4.56346	27.4071	0.121868	rep2	Yes
42	Cluster22703	Peptide	IPLSSQLPGDMVFIEATGEK	1370.76	2739.49	2435.29	9.5	2	4.77	6.19	1	iTRAQ8plex[+304.20536] (K20)	2	7	4.59956e+06	3.07363e+08	3.19219	0.0327069	80.8529	0.0138766	rep1	Yes
42	Cluster22703	Peptide	IPLSSQLPGDMVFIEATGEK	761.931	3043.69	3043.7	2.1	4	2.61	0	0.95	iTRAQ8plex[+304.20536] (N-term); iTRAQ8plex[+304.20536] (K20); iTRAQ8plex[+304.20536] (S5)	2	1	1.88794e+07	1.88794e+07	0.00670729	0.161964	0.630333	0.977573	rep2	Yes
42	Cluster22703	Peptide	IPLSSQLPGDMVFIEATGEK	1370.76	2739.5	2739.5	1.46	2	2.31	0	0.95	iTRAQ8plex[+304.20536] (N-term); iTRAQ8plex[+304.20536] (K20)	2	3	4.59956e+06	1.20767e+07	3.19216	0.0327068	80.853	0.0138766	rep1	Yes
42	Cluster22703	Peptide	IQNMGWR	604.828	1207.64	1207.64	3.15	2	2.31	0	0.95	iTRAQ8plex[+304.20536] (N-term)	2	1	2.14811e+07	2.14811e+07	0.915275	0.0881092	48.3863	3.35039	rep2	Yes
42	Cluster22703	Peptide	ISHRLIPK	662.422	1322.83	1322.83	4.73	2	2.78	1.94	0.95	Acetyl[+42.010565] (H3); Methyl[+14.01565] (R4); iTRAQ8plex[+304.20536] (K8)	2	1	2.66711e+06	2.66711e+06	81.5195	6.80216	0.638837	0.119686	rep2	Yes
42	Cluster22703	Peptide	KGFVLGNDGVLLR	998.606	1995.2	1995.2	2.61	2	2.31	0	0.95	iTRAQ8plex[+304.20536] (N-term); iTRAQ8plex[+304.20536] (K1)	2	6	1.11712e+06	5.57619e+07	0.921333	0.174844	0.597906	4.80397	rep2	Yes
42	Cluster22703	Peptide	QTLLETK	720.944	1439.87	1135.68	10	2	3.38	3.32	0.95	iTRAQ8plex[+304.20536] (K7)	2	3	1.15931e+08	4.05934e+08	0.905154	0.0645472	0.615108	0.00830972	rep2	Yes
42	Cluster22703	Peptide	QTLLETK	568.844	1135.67	1135.67	1.76	2	2.31	0	0.95	iTRAQ8plex[+304.20536] (N-term); iTRAQ8plex[+304.20536] (K7)	2	1	2.04529e+07	2.04529e+07	1.00269	6.56054	41.4948	3.51757	rep2	Yes
42	Cluster22703	Peptide	SAEMVTDEGAIYVTSNK	808.42	2422.24	2118.05	10	3	5.42	7	1	iTRAQ8plex[+304.20536] (K17)	2	1	4.60455e+07	4.60455e+07	0.0129015	0.0892284	57.9498	0.00996134	rep2	Yes
42	Cluster22703	Peptide	SEEEAWAAGGSGILLR	836.417	1670.82	1670.82	1.32	2	2.31	0	0.95	Delta:H(2)C(2)[+26.01565] (N-term)	2	1	3.263e+06	3.263e+06	0	0	0	0	rep2	No
42	Cluster22703	Peptide	SEEEAWAAGGSGILLR	975.514	1949.01	1644.81	10	2	6.28	6.98	1		2	12	7.57452e+07	3.36806e+08	0	0	0	0	rep1	No
42	Cluster22703	Peptide	SEEEAWAAGGSGILLR	564.311	2253.21	2253.22	2.66	4	2.61	0	0.95	iTRAQ8plex[+304.20536] (N-term); iTRAQ8plex[+304.20536] (S1)	2	1	3.27235e+07	3.27235e+07	1.14004	0.376152	0.609095	39.7385	rep2	Yes
[truncated: 13,843 more rows]
